# Supplementary material for: Key regulators of lipid metabolism drive endocrine resistance in invasive lobular breast cancer
Source: Breast Cancer Res. 2018 Sep 4;20:106. doi: 10.1186/s13058-018-1041-8 (PMC6124012; doi:10.1186/s13058-018-1041-8)
Supplement: Supplementary file 2 — Table S1. Sequences of primers and small interfering RNAs (siRNAs). (XLSX 9 kb) [file 13058_2018_1041_MOESM2_ESM.xlsx]

## Sheet: Sheet1
Primer Sequences
Gene	Species	Source	Forward Primer Sequence	Reverse Primer Sequence
RPLP0	Human	IDT	TAAACCCTGCGTGGCAATC	TTGTCTGCTCCCACAATGAAA
SREBF1a	Human	IDT	CTGACCGACATCGAAGGTG	GGGAAGTCACTGTCTTGGTTG
SREBF1c	Human	IDT	AACGGCTTCAAAAATCCGCC	AAGTGCAATCCATGGCTCCG
SREBF2	Human	IDT	TTCCTGTGCCTCTCCTTTAAC	TCATCCAGTCAAACCAGCC
ACACA	human	IDT	AAGAATCGGACTGGCAGAAG	AATGGACAGAGTTGAGAGCAC
ACLY	Human	IDT	AGACTATCCTCTCCCTCATGAC	CGTTGGTGAAGTTTGCGATG
FASN	Human	IDT	CAAGCTGAAGGACCTGTCTAG	CGGAGTGAATCTGGGTTGATG
SCD	Human	IDT	AGTTCTACACCTGGCTTTGG	GTTGGCAATGATCAGAAAGAGC
ESR1	Human	IDT	GAGTATGATCCTACCAGACCCTTC	CCTGATCATGGAGGGTCAAATC
siRNA Sequences
Target Gene	Species	Type (pool/invidual)		Sequences (different siRNAs in a pool are seperated by comma)
SREBF1	Human	Pool	Dharmacon M-006891-01-0005	UGACUUCCCUGGCCUAUUU,ACAUUGAGCUCCUCUCUUG,GCGCACUGCUGUCCACAAA,ACACAGACGUGCUCAUGGA
SREBF2	Human	Pool	Dharmacon M-009549-00-0005	GAGCGGAGCUGGUCUGUGA,GAAGAGAGCUGUGAAUUCU,GCACAAGUCUGGCGUUCUG,AAACUCAGCUGCAACAACA
Non-target	Human	Pool	Dharmacon D-001206-14-05	UAAGGCUAUGAAGAGAUAC,AUGUAUUGGCCUGUAUUAG,AUGAACGUGAAUUGCUCAA,UGGUUUACAUGUCGACUAA
