# Supplementary material for: Key regulators of lipid metabolism drive endocrine resistance in invasive lobular breast cancer
Source: Breast Cancer Res. 2018 Sep 4;20:106. doi: 10.1186/s13058-018-1041-8 (PMC6124012; doi:10.1186/s13058-018-1041-8)
Supplement: Supplementary file 3 — Table S2. Mapping rate of Salmon. (XLSX 9 kb) [file 13058_2018_1041_MOESM3_ESM.xlsx]

## Sheet: Sheet1
Note: RNA-Seq was done on MM134 and SUM44 parental (P) and LTED cells (triplicates). Parental cells were hormone deprived before RNA colelction. SUM44F was used as parental cell lines for SUM44 LTED cells. 1, 2, 3 stand for different replicates of samples.
	MM134 parenta LTED-.1	MM134 parenta LTED-.2	MM134 parenta LTED-.3	MM134 LTED-A.1	MM134 LTED-A.2	MM134 LTED-A.3	MM134 LTED-B.1	MM134 LTED-B.2	MM134 LTED-B.3	MM134 LTED-D.1	MM134 LTED-D.2	MM134 LTED-D.3	MM134 LTED-E.1	MM134 LTED-E.2	MM134 LTED-E.3	SUM44PE.1	SUM44PE.2	SUM44PE.3	SUM44 parental (F).1	SUM44 parental (F).2	SUM44 parental (F).3	SUM44 LTED-A.1	SUM44 LTED-A.2	SUM44 LTED-A.3	SUM44 LTED-B.1	SUM44 LTED-B.2	SUM44 LTED-B.3
observed fragments	40970497	43178775	28583557	101378770	73832619	73173039	57018597	55031475	51991610	40632904	45280629	55245856	51127425	66904591	68798135	49063321	60225387	50544494	57741027	64255076	107768628	52222499	166423510	139049373	43023968	51643037	126016252
mapping rate	0.782445	0.783051	0.587225	0.782636	0.744692	0.779791	0.769103	0.799877	0.808807	0.794533	0.817079	0.820312	0.791364	0.704141	0.763134	0.725896	0.782212	0.768556	0.770464	0.767172	0.707539	0.764841	0.810475	0.803238	0.804007	0.82451	0.775277
