# Supplementary material for: Key regulators of lipid metabolism drive endocrine resistance in invasive lobular breast cancer
Source: Breast Cancer Res. 2018 Sep 4;20:106. doi: 10.1186/s13058-018-1041-8 (PMC6124012; doi:10.1186/s13058-018-1041-8)
Supplement: Supplementary file 4 — Table S3. Differentially expressed genes in MM134 and SUM44 long-term estrogen deprivation (LTED) cells and SUM44 tamoxifen-resistant cell (SUM44 TamR) cells. (XLSX 3466 kb) [file 13058_2018_1041_MOESM4_ESM.xlsx]

## Sheet: MM134 LTED-A DE gene
	log2FoldChange	p-value	adjusted p-value	gene_symbol
ENSG00000282164	-0.703616	1.27605e-06	5.58051e-06	PEG13
ENSG00000282012	1.84882	6.28872e-07	2.81722e-06	LL22NC03-N95F10.1
ENSG00000281909	2.07071	6.48263e-13	4.01582e-12	RP11-439M15.1
ENSG00000281406	-2.71369	2.13086e-12	1.28822e-11	BLACAT1
ENSG00000281404	-0.859497	9.8374e-06	3.99102e-05	LINC01176
ENSG00000281332	-0.800228	2.9413e-05	0.000114909	LINC00997
ENSG00000280987	-0.76573	4.12505e-17	3.02254e-16	MATR3
ENSG00000280604	-1.55875	1.05594e-06	4.65042e-06	PCBP3-OT1
ENSG00000280404	0.964388	2.39772e-08	1.17451e-07	AC005086.3
ENSG00000280389	1.32919	4.85823e-10	2.6226e-09	RP11-512M8.11
ENSG00000280339	-1.16817	3.79688e-08	1.83737e-07	RP11-736K20.4
ENSG00000280237	-1.05806	3.19058e-08	1.55205e-07	MIR4697HG
ENSG00000280222	-1.59532	7.8042e-05	0.000293261	RP11-174G17.3
ENSG00000280217	2.62371	1.41281e-41	1.8933e-40	RP11-638F5.2
ENSG00000280202	1.16575	5.1651e-06	2.14751e-05	RP5-1180D12.1
ENSG00000280153	0.954016	3.71844e-06	1.56526e-05	RP11-876N24.3
ENSG00000280120	-0.668107	2.953e-12	1.77092e-11	RP11-546D6.3
ENSG00000280073	-1.78741	8.24471e-14	5.31915e-13	CTD-2525P14.5
ENSG00000280055	-2.47503	7.94439e-10	4.24528e-09	TMEM75
ENSG00000280043	1.02242	6.84728e-05	0.000258944	RP11-1281K21.8
ENSG00000279805	-1.89771	2.10866e-06	9.06495e-06	CTA-212A2.1
ENSG00000281881	1.88511	3.16303e-19	2.46973e-18	SPRY4-IT1
ENSG00000279769	-1.37728	1.64685e-05	6.55898e-05	CH507-42P11.3
ENSG00000279713	-2.36716	5.12925e-09	2.61963e-08	CTD-3035K23.3
ENSG00000279708	-1.46182	0.000157948	0.000576453	CTD-2335A18.2
ENSG00000279694	0.764469	7.45247e-09	3.76588e-08	RP11-5O23.2
ENSG00000279673	2.44963	3.7085e-10	2.01206e-09	RP11-185E8.2
ENSG00000279605	0.829668	1.17661e-09	6.2294e-09	RP11-661A12.8
ENSG00000279377	0.646008	3.90219e-07	1.76792e-06	AC003973.3
ENSG00000279302	0.995641	5.7197e-05	0.000218149	RP11-16P20.4
ENSG00000279117	-0.807787	2.75589e-140	1.1149e-138	CTD-2562J17.6
ENSG00000278971	4.19067	2.11332e-39	2.68952e-38	RP11-644A7.2
ENSG00000278962	-2.46228	7.66588e-10	4.099e-09	RP11-399B17.1
ENSG00000278948	-2.15817	8.65636e-35	1.0087e-33	RP5-1039K5.12
ENSG00000278915	1.60867	1.64288e-07	7.62499e-07	AC005609.18
ENSG00000278912	-2.20143	1.15343e-08	5.76499e-08	CTD-2196E14.8
ENSG00000278882	1.22868	3.06123e-11	1.75532e-10	AC253572.1
ENSG00000278817	1.41822	1.19804e-67	2.40356e-66	AC007325.4
ENSG00000278743	1.2982	2.19496e-08	1.07749e-07	RP11-707G18.1
ENSG00000278231	-1.64372	1.81659e-05	7.21496e-05	RP5-906C1.1
ENSG00000278200	-2.75743	3.85748e-15	2.63085e-14	RP13-766D20.4
ENSG00000277632	-1.76113	1.29024e-11	7.51357e-11	CCL3
ENSG00000279390	-0.874177	9.40982e-08	4.44167e-07	AF127577.13
ENSG00000277232	-0.630221	1.26844e-06	5.55005e-06	GTSE1-AS1
ENSG00000277200	-1.85797	1.39604e-26	1.33758e-25	RP11-74E22.8
ENSG00000277053	-0.871266	1.17971e-54	1.98466e-53	GTF2IP1
ENSG00000277010	-1.3436	2.55578e-06	1.09269e-05	RP11-616M22.12
ENSG00000276740	1.3751	8.17603e-06	3.34781e-05	RP11-381O6.1
ENSG00000279512	-1.22667	6.46002e-05	0.000245026	RP11-575M22.1
ENSG00000276345	0.740129	7.43319e-46	1.07623e-44	AC004556.1
ENSG00000279174	3.44679	2.26908e-25	2.10827e-24	RP11-1099M24.9
ENSG00000276216	0.715059	3.69576e-24	3.31904e-23	CH17-373J23.1
ENSG00000276171	0.742382	2.41608e-21	2.00923e-20	AC114498.1
ENSG00000276168	0.822079	1.47276e-14	9.82043e-14	RN7SL1
ENSG00000276116	1.28854	1.36486e-20	1.10875e-19	FUT8-AS1
ENSG00000276047	0.660625	1.17695e-07	5.51463e-07	RN7SL711P
ENSG00000276045	0.639247	7.68554e-21	6.28496e-20	ORAI1
ENSG00000275993	-1.60857	1.17281e-47	1.74135e-46	CH507-42P11.8
ENSG00000275793	-0.742443	8.22442e-06	3.36722e-05	RIMBP3
ENSG00000275484	-1.03144	0.000201608	0.000726316	CTC-1337H24.4
ENSG00000275395	6.58623	0	0	FCGBP
ENSG00000275337	0.727283	7.28848e-07	3.24775e-06	RN7SL680P
ENSG00000275318	-0.843507	2.13959e-05	8.4461e-05	RP11-526D8.11
ENSG00000275223	-0.976238	8.30732e-09	4.18862e-08	RP1-63M2.7
ENSG00000274897	1.10473	6.11834e-17	4.4565e-16	PANO1
ENSG00000274810	-0.977467	0.000114759	0.000425057	NPHP3-ACAD11
ENSG00000274767	-1.67413	4.3055e-75	9.43014e-74	AC131056.3
ENSG00000274340	1.38338	1.60715e-17	1.19311e-16	RP11-435J9.2
ENSG00000274269	2.1461	1.90319e-08	9.38413e-08	RP4-545L17.12
ENSG00000274266	0.626682	1.27231e-05	5.1135e-05	SNORA73A
ENSG00000277619	1.21716	1.92418e-08	9.48625e-08	CTC-276P9.4
ENSG00000274020	-1.62265	1.10249e-12	6.75539e-12	LINC01138
ENSG00000274012	0.739833	1.65351e-15	1.14336e-14	Metazoa_SRP
ENSG00000273604	-0.87059	1.93097e-33	2.1936e-32	C17orf96
ENSG00000273456	-1.08884	3.66537e-10	1.98929e-09	RP11-686O6.2
ENSG00000273373	-0.643576	1.59443e-05	6.35977e-05	RP5-1074L1.4
ENSG00000273320	1.36998	1.25101e-20	1.01723e-19	RP11-22N19.2
ENSG00000273259	1.91265	6.57452e-287	6.45937e-285	SERPINA3
ENSG00000273209	-1.52654	1.89961e-05	7.53424e-05	RP11-107N15.1
ENSG00000273179	3.34256	1.53518e-20	1.24446e-19	RP11-20I20.4
ENSG00000273136	0.696531	1.30989e-33	1.49298e-32	NBPF26
ENSG00000273063	-0.964439	0.000249804	0.000892284	RP11-334G22.1
ENSG00000273015	-0.776394	8.63179e-36	1.02564e-34	RP11-352M15.2
ENSG00000273004	-1.66202	1.28751e-08	6.41832e-08	GS1-279B7.2
ENSG00000272949	-0.970409	2.84079e-08	1.38601e-07	RP11-514P8.8
ENSG00000272870	-0.874096	2.29415e-08	1.12473e-07	RP11-798M19.6
ENSG00000272750	1.09951	1.00365e-07	4.72645e-07	RP11-378J18.8
ENSG00000272568	-1.15759	1.24496e-15	8.63812e-15	CTB-113D17.1
ENSG00000272516	-5.37821	5.53531e-89	1.41729e-87	RP11-573G6.9
ENSG00000272514	-0.823036	2.50678e-10	1.37328e-09	CFAP206
ENSG00000272508	1.09875	0.000179657	0.000650781	RP11-96C23.14
ENSG00000272485	-2.14877	1.29129e-12	7.89118e-12	RP11-284J1.1
ENSG00000272414	0.774751	3.80424e-30	4.01277e-29	FAM47E-STBD1
ENSG00000272412	1.00423	3.92866e-08	1.89954e-07	RN7SL778P
ENSG00000272398	1.05939	0	0	CD24
ENSG00000272366	-2.31864	2.06684e-09	1.07931e-08	RP11-573G6.10
ENSG00000272341	2.01407	5.50976e-61	1.01535e-59	RP1-151F17.2
ENSG00000272320	1.02242	3.75638e-06	1.58065e-05	RP11-506K6.4
ENSG00000272196	-0.671515	7.71589e-06	3.16543e-05	HIST2H2AA4
ENSG00000272168	-1.77996	1.07019e-38	1.34505e-37	CASC15
ENSG00000272162	-1.42779	0.000230825	0.000827499	RP11-637O19.3
ENSG00000272159	-0.891465	2.38007e-13	1.50808e-12	RP11-350N15.6
ENSG00000272129	0.81357	2.13373e-05	8.42491e-05	RP11-250B2.6
ENSG00000273008	-0.732739	1.50777e-05	6.02459e-05	RP11-351D16.3
ENSG00000271931	-1.79207	3.11434e-08	1.51668e-07	RP11-63L7.5
ENSG00000271895	-0.69439	0.000247715	0.00088519	RP4-635E18.8
ENSG00000271824	-2.33269	4.98816e-28	4.98917e-27	AC009014.3
ENSG00000271821	-1.6713	2.51907e-05	9.89866e-05	XXbac-BPG299F13.14
ENSG00000271784	0.987351	6.27071e-06	2.5914e-05	RP1-28H20.3
ENSG00000271781	-1.04707	1.53742e-07	7.14714e-07	CTD-2589H19.6
ENSG00000271698	-1.64395	2.48245e-07	1.14032e-06	GS1-393G12.13
ENSG00000271503	0.897493	5.67048e-05	0.000216392	CCL5
ENSG00000271275	-1.54502	6.48049e-05	0.000245694	AC007326.9
ENSG00000271155	1.6897	8.06113e-06	3.30273e-05	RP11-435O5.5
ENSG00000270959	-0.862666	5.76369e-21	4.73474e-20	LPP-AS2
ENSG00000270885	-2.24549	7.11446e-77	1.58449e-75	RASL10B
ENSG00000270607	-1.26045	9.39191e-07	4.15008e-06	RP11-359E10.1
ENSG00000270604	1.10373	0.000278841	0.000989834	HCG17
ENSG00000270390	1.96189	7.73527e-07	3.43971e-06	RP11-470B22.1
ENSG00000270362	0.612144	6.63715e-05	0.000251356	HMGN3-AS1
ENSG00000270181	1.72344	3.61061e-13	2.26566e-12	BIVM-ERCC5
ENSG00000270164	2.36252	2.00362e-20	1.61924e-19	LINC01480
ENSG00000270157	0.923344	3.83756e-16	2.71919e-15	RP5-894A10.6
ENSG00000272732	1.0076	5.70329e-05	0.000217547	RP5-1159O4.2
ENSG00000269911	-1.88928	2.27725e-11	1.31301e-10	RP1-172N19.5
ENSG00000269893	1.12878	1.11965e-58	1.99488e-57	SNHG8
ENSG00000269516	-1.38493	1.15666e-39	1.48079e-38	CYP4F23P
ENSG00000276564	-0.669875	0.000166683	0.000605891	CTA-276F8.1
ENSG00000269226	-1.35469	4.76735e-10	2.57436e-09	RP11-722G7.1
ENSG00000275538	1.79304	9.04016e-10	4.81512e-09	RNVU1-19
ENSG00000268869	-1.35379	4.76264e-07	2.14643e-06	ESPNP
ENSG00000268654	-2.69202	2.02198e-12	1.22347e-11	MIMT1
ENSG00000268628	1.17755	1.29384e-16	9.3234e-16	RP1-122P22.4
ENSG00000277879	-1.13639	5.2803e-05	0.000202085	RP11-129M16.4
ENSG00000268531	1.85704	1.84038e-08	9.08485e-08	RP11-32B5.8
ENSG00000268355	2.71537	2.43118e-24	2.19714e-23	AC006129.1
ENSG00000267809	0.602358	7.21904e-06	2.96691e-05	NDUFV2P1
ENSG00000267801	1.25684	7.02657e-15	4.75167e-14	RP11-552F3.9
ENSG00000267784	-1.57714	3.88998e-06	1.63506e-05	RP11-171I2.1
ENSG00000267751	0.885237	3.49269e-06	1.47366e-05	AC009005.2
ENSG00000267701	-2.71752	3.65234e-13	2.291e-12	NA
ENSG00000267649	-1.35334	7.24969e-07	3.23172e-06	CTD-2587H24.10
ENSG00000267424	-2.011	2.01033e-07	9.28158e-07	CTD-2265O21.3
ENSG00000267414	-1.6029	1.06979e-08	5.36015e-08	RP11-456K23.1
ENSG00000267322	-0.676978	9.80759e-15	6.596e-14	SNHG22
ENSG00000267280	0.844213	2.06921e-06	8.90315e-06	TBX2-AS1
ENSG00000267265	0.702079	4.03589e-06	1.69412e-05	CTC-550B14.7
ENSG00000267259	-0.73121	7.60515e-17	5.52659e-16	CTD-2008P7.9
ENSG00000267234	-0.927193	2.07224e-09	1.08196e-08	CTB-184G21.3
ENSG00000267077	1.98935	5.1614e-11	2.9259e-10	RP11-127I20.5
ENSG00000267070	0.777246	6.11559e-05	0.000232372	RP11-10K17.6
ENSG00000267040	0.825271	2.41324e-05	9.4969e-05	RP11-35G9.3
ENSG00000267034	-3.24262	1.0971e-15	7.63681e-15	RP11-384O8.1
ENSG00000266970	-1.65966	1.23312e-06	5.40171e-06	RP11-806H10.4
ENSG00000266875	0.719208	0.000267575	0.00095161	RN7SL408P
ENSG00000277630	1.61914	6.95288e-09	3.52015e-08	BX072566.1
ENSG00000266420	0.714538	9.32962e-10	4.96161e-09	RN7SL118P
ENSG00000266338	0.599258	5.55644e-53	9.06401e-52	NBPF15
ENSG00000266028	-1.16572	1.65529e-81	3.89068e-80	SRGAP2
ENSG00000265918	0.7086	2.71229e-12	1.63112e-11	RN7SL543P
ENSG00000265778	-1.97218	6.79018e-13	4.20081e-12	RP11-17M16.2
ENSG00000265766	3.0691	2.30385e-23	2.03187e-22	CXADRP3
ENSG00000265763	-1.40803	8.35522e-06	3.41874e-05	ZNF488
ENSG00000265690	1.43984	7.06892e-05	0.000266944	RP11-5A19.5
ENSG00000282390	-1.78339	1.25967e-07	5.88455e-07	RP11-29A19.2
ENSG00000265519	0.985352	0.00010985	0.000407575	CTD-3157E16.1
ENSG00000264964	1.32134	1.20032e-05	4.83434e-05	RP11-888D10.3
ENSG00000264916	0.928436	2.25005e-06	9.65226e-06	RN7SL230P
ENSG00000264885	-0.885006	5.48921e-05	0.000209754	RP11-815I9.4
ENSG00000264833	0.988481	1.75251e-06	7.57935e-06	RN7SL468P
ENSG00000264714	-2.23428	8.68574e-09	4.37301e-08	RP11-21G15.1
ENSG00000264630	1.53976	0.000115536	0.00042784	PRKCA-AS1
ENSG00000270249	-1.68298	4.09725e-09	2.10318e-08	RP11-514P8.7
ENSG00000271254	-1.13217	3.40455e-143	1.40712e-141	AC240274.1
ENSG00000264364	-0.628697	3.91044e-33	4.40736e-32	DYNLL2
ENSG00000264357	1.13369	0.000249891	0.000892502	MIR4648
ENSG00000272143	0.871571	3.14841e-07	1.43682e-06	FGF14-AS2
ENSG00000264229	-1.06349	3.63532e-05	0.000141029	RNU4ATAC
ENSG00000264222	1.0355	0.000102121	0.000380295	RP11-757O6.1
ENSG00000263969	1.12438	1.54083e-09	8.11278e-09	RN7SL678P
ENSG00000275077	1.62131	3.67175e-08	1.77782e-07	AC012363.1
ENSG00000263812	-1.21455	6.57249e-08	3.13291e-07	LINC00908
ENSG00000277147	-1.57971	7.11879e-26	6.68471e-25	LINC00869
ENSG00000263535	-2.0535	1.20523e-21	1.01132e-20	AK4P1
ENSG00000273032	-1.81723	1.87262e-11	1.08334e-10	DGCR9
ENSG00000263429	2.24123	1.85228e-12	1.12237e-11	LINC00675
ENSG00000263427	3.5242	6.68817e-27	6.46392e-26	RP11-599B13.3
ENSG00000263327	0.838238	2.61472e-07	1.19947e-06	TAPT1-AS1
ENSG00000263155	-2.66344	2.40934e-11	1.38847e-10	MYZAP
ENSG00000262823	1.26363	5.41414e-05	0.000207046	RP13-580F15.2
ENSG00000261889	0.708968	4.59969e-12	2.7346e-11	RP11-473M20.16
ENSG00000261762	-1.03418	3.23763e-07	1.47597e-06	RP11-650L12.2
ENSG00000261685	4.83251	1.56881e-72	3.35281e-71	RP11-401P9.4
ENSG00000261684	1.11771	0.000131193	0.000482856	RP11-265N6.1
ENSG00000261678	-2.88621	2.70074e-61	4.99841e-60	SCRT1
ENSG00000261520	-1.07497	2.04341e-05	8.0813e-05	DLGAP1-AS5
ENSG00000261460	0.819515	0.000252943	0.000902745	RP11-106M3.3
ENSG00000261439	-2.61936	1.85788e-11	1.07536e-10	DKFZP434H168
ENSG00000261409	-0.927264	3.54002e-06	1.49253e-05	RP6-24A23.7
ENSG00000261385	1.37044	1.04546e-05	4.23142e-05	RP11-388M20.2
ENSG00000261379	-1.95259	1.43085e-06	6.23923e-06	RP11-395N3.1
ENSG00000261335	-0.888428	1.59922e-13	1.0216e-12	RP11-318A15.2
ENSG00000261226	-1.99439	1.31144e-11	7.63442e-11	RP11-830F9.7
ENSG00000261202	-0.904321	6.91209e-06	2.8462e-05	RP3-496C20.1
ENSG00000261189	-1.12257	2.33108e-09	1.21453e-08	RP3-512B11.3
ENSG00000269113	-2.657	5.16653e-11	2.92832e-10	TRABD2B
ENSG00000261115	4.94589	0	0	TMEM178B
ENSG00000261064	1.24265	5.9693e-05	0.000227165	RP11-1000B6.3
ENSG00000261051	-2.11495	1.03474e-07	4.86753e-07	RP11-274H2.5
ENSG00000261026	-1.89494	2.56475e-06	1.09626e-05	CTD-3247F14.2
ENSG00000260955	1.37759	8.61263e-06	3.5182e-05	RP11-30L15.6
ENSG00000260916	0.844746	4.33859e-123	1.53647e-121	CCPG1
ENSG00000260903	-5.09486	5.76196e-288	5.67726e-286	XKR7
ENSG00000260886	1.81726	4.71923e-10	2.54957e-09	TAT-AS1
ENSG00000260855	0.873408	2.09806e-06	9.02276e-06	RP11-439E19.10
ENSG00000260788	2.82369	2.43583e-16	1.73742e-15	RP11-298D21.1
ENSG00000260711	1.01836	2.79269e-32	3.08885e-31	RP11-747H7.3
ENSG00000260691	1.4406	3.0128e-05	0.000117622	ANKRD20A1
ENSG00000260653	2.37507	2.61366e-09	1.35703e-08	RP11-114G11.5
ENSG00000260469	-4.81886	3.08727e-69	6.3154e-68	C15orf59-AS1
ENSG00000260455	-1.29989	0.000182382	0.000659955	NBAT1
ENSG00000260404	0.785556	1.43824e-07	6.6951e-07	RP11-384K6.6
ENSG00000260401	-0.929089	5.6675e-12	3.35378e-11	RP11-800A3.4
ENSG00000260400	-1.31666	2.43128e-09	1.26539e-08	RP11-119F7.5
ENSG00000260296	-1.39187	3.20407e-12	1.91982e-11	RP11-395I6.3
ENSG00000260293	-0.608177	1.30286e-05	5.23094e-05	RP11-715J22.6
ENSG00000260246	1.77227	1.44998e-07	6.74883e-07	AC000032.2
ENSG00000260231	2.28606	5.43953e-120	1.86862e-118	JHDM1D-AS1
ENSG00000260228	0.977489	8.32152e-07	3.69181e-06	RP11-483P21.2
ENSG00000272153	0.807398	4.54033e-05	0.00017464	RP1-286D6.5
ENSG00000260081	-0.928228	2.65048e-05	0.000103948	RP11-66N11.8
ENSG00000260029	1.82659	4.21357e-06	1.76611e-05	RP11-401P9.1
ENSG00000260009	-1.87321	3.58859e-06	1.51189e-05	RP11-65J21.1
ENSG00000259985	-1.12636	0.000123999	0.000457702	RP11-549B18.1
ENSG00000259725	0.861607	1.98827e-09	1.0386e-08	CTD-3032H12.1
ENSG00000259674	3.15429	9.77273e-31	1.0443e-29	RP11-356M20.1
ENSG00000259669	1.77437	3.87599e-06	1.62958e-05	RP11-643A5.2
ENSG00000259644	1.80523	3.52932e-06	1.48838e-05	RP11-680F8.4
ENSG00000259605	-1.13143	9.22912e-10	4.90968e-09	AC074212.5
ENSG00000276855	0.691157	9.19033e-08	4.33985e-07	CTD-3157E16.2
ENSG00000259448	-1.39912	2.8484e-06	1.21373e-05	RP11-16E12.1
ENSG00000260253	1.04991	0.000164862	0.000599905	RP4-676L2.1
ENSG00000259394	-1.18966	0.000275983	0.000980397	RP11-244F12.1
ENSG00000259171	0.670383	9.95349e-11	5.56267e-10	RP11-903H12.5
ENSG00000267503	-1.69212	2.06272e-05	8.15388e-05	RP11-53B2.4
ENSG00000259153	0.786969	5.70435e-12	3.37501e-11	RP6-65G23.3
ENSG00000259124	1.71328	1.34521e-05	5.39388e-05	RP11-187O7.3
ENSG00000259120	2.85477	2.29675e-33	2.60654e-32	SMIM6
ENSG00000259091	-1.1848	1.22092e-06	5.35098e-06	LINC00517
ENSG00000259070	1.71207	1.88116e-14	1.24807e-13	LINC00639
ENSG00000259049	0.686963	0.000139967	0.000513171	RP11-589M4.1
ENSG00000259024	0.856892	4.9503e-12	2.93645e-11	TVP23C-CDRT4
ENSG00000265000	-1.14792	6.63129e-05	0.000251162	RP11-453A12.1
ENSG00000258941	3.45528	1.50459e-29	1.56783e-28	RP11-407N17.3
ENSG00000268439	1.05011	5.87706e-15	3.98923e-14	RP3-461F17.3
ENSG00000272631	-0.776068	6.21956e-08	2.97045e-07	RP11-359E3.4
ENSG00000258818	0.658036	3.32748e-29	3.4361e-28	RNASE4
ENSG00000258689	2.73305	2.15531e-16	1.54021e-15	LINC01269
ENSG00000258656	-1.75375	7.79344e-07	3.46423e-06	RP11-193F5.4
ENSG00000258616	3.37137	2.74454e-31	2.97436e-30	RP11-369C8.1
ENSG00000268119	0.926284	3.65298e-28	3.66332e-27	CTD-2561J22.5
ENSG00000261371	2.10456	3.27418e-33	3.69872e-32	PECAM1
ENSG00000258441	-0.655011	5.47061e-19	4.24837e-18	LINC00641
ENSG00000270276	-1.30725	6.6893e-21	5.48723e-20	HIST2H4B
ENSG00000258334	-1.92578	1.29304e-30	1.37915e-29	RP11-161H23.9
ENSG00000258297	-0.895508	8.95619e-10	4.77113e-09	RP11-658F2.8
ENSG00000258215	-1.335	0.000140808	0.000516035	RP11-299A16.1
ENSG00000258135	-1.86735	3.90721e-06	1.64191e-05	RP11-70F11.11
ENSG00000258056	0.695445	7.93027e-14	5.12109e-13	RP11-644F5.11
ENSG00000257950	-0.664118	4.05959e-08	1.96091e-07	P2RX5-TAX1BP3
ENSG00000257891	0.705931	7.07204e-05	0.000267032	CTD-2311B13.1
ENSG00000257817	-0.595321	0.000281926	0.00099965	RP4-601P9.2
ENSG00000266176	-1.81258	5.03715e-08	2.41917e-07	RP11-855A2.5
ENSG00000257704	-0.895478	1.5849e-07	7.36189e-07	INAFM1
ENSG00000265787	1.23679	5.93628e-18	4.4697e-17	CYP4F35P
ENSG00000257542	-2.03418	2.55943e-07	1.1751e-06	OR7E47P
ENSG00000257456	2.24667	7.03379e-09	3.55954e-08	RP11-310I24.1
ENSG00000257342	0.920697	1.81903e-06	7.85619e-06	RP11-571M6.7
ENSG00000275719	1.13491	1.51669e-09	7.98689e-09	CTB-147N14.6
ENSG00000257108	-4.22852	8.24665e-61	1.51403e-59	NHLRC4
ENSG00000279196	1.57861	8.01171e-18	5.99823e-17	RP11-1072A3.3
ENSG00000257093	1.23859	1.66247e-281	1.57486e-279	KIAA1147
ENSG00000257002	1.76307	1.43953e-09	7.58756e-09	AP000438.2
ENSG00000275371	1.33928	8.4101e-06	3.43956e-05	RP11-455F5.6
ENSG00000256594	-0.758065	1.76888e-23	1.56406e-22	RP11-705C15.2
ENSG00000256574	-1.55301	0.000130976	0.000482108	OR13A1
ENSG00000256463	-2.87751	2.41829e-19	1.89685e-18	SALL3
ENSG00000273175	0.6245	5.68872e-05	0.000217041	RP11-11N7.4
ENSG00000256196	0.929331	0.00022052	0.00079229	RP11-881M11.4
ENSG00000256013	1.07001	7.96443e-06	3.26428e-05	RP11-27M24.1
ENSG00000273305	-1.55767	1.01382e-05	4.10722e-05	RP11-440D17.4
ENSG00000255864	-2.38399	3.08965e-09	1.59861e-08	RP11-444D3.1
ENSG00000255860	2.54367	3.35562e-12	2.00923e-11	RP11-807H22.6
ENSG00000268357	-1.11408	1.39155e-23	1.23455e-22	VN1R81P
ENSG00000270168	4.91611	1.71644e-180	9.22235e-179	LA16c-380H5.3
ENSG00000274349	1.0818	4.97711e-28	4.98013e-27	ZNF658
ENSG00000255571	-1.30642	2.99352e-44	4.22396e-43	MIR9-3HG
ENSG00000255523	1.19791	1.07436e-05	4.3448e-05	RP11-780O24.2
ENSG00000255408	-1.76769	1.95484e-13	1.24391e-12	PCDHA3
ENSG00000258072	-1.12142	3.40204e-07	1.54846e-06	RP11-554D14.2
ENSG00000255240	1.85233	8.77034e-80	2.00923e-78	RP11-142C4.6
ENSG00000255129	-1.5358	7.11815e-14	4.61138e-13	RP11-839D17.3
ENSG00000255071	3.37185	2.30404e-18	1.75674e-17	SAA2-SAA4
ENSG00000254981	-1.29402	1.78808e-18	1.36819e-17	RP11-350N15.3
ENSG00000254864	-0.646132	3.85025e-06	1.61916e-05	CTD-2516F10.4
ENSG00000254837	-0.585569	7.5922e-26	7.12536e-25	AP001372.2
ENSG00000254786	1.48685	6.25103e-10	3.35708e-09	RP11-142C4.5
ENSG00000254717	1.0928	6.71938e-14	4.35796e-13	GLYATL1P2
ENSG00000274718	2.20654	4.98028e-11	2.82602e-10	RP11-346C4.3
ENSG00000254429	-1.07485	1.34507e-07	6.27498e-07	CTD-2562J17.7
ENSG00000254399	1.23174	1.02928e-05	4.16691e-05	GLYATL1P4
ENSG00000254343	2.12183	4.35484e-32	4.79199e-31	RP11-760H22.2
ENSG00000254278	2.18907	3.33866e-09	1.7233e-08	RP11-278I4.2
ENSG00000254233	2.80656	2.83888e-15	1.9458e-14	RP11-242J7.1
ENSG00000280583	0.667696	0.000123214	0.000455051	AC138645.1
ENSG00000254111	1.31307	0.000130745	0.000481309	RP11-150O12.5
ENSG00000254057	0.99747	0.000168963	0.000613789	RP3-388N13.3
ENSG00000254054	3.35438	2.21627e-22	1.90527e-21	RP11-156K13.3
ENSG00000253978	-1.29319	0.000237089	0.000848719	CTB-178M22.2
ENSG00000253972	3.23936	1.60705e-88	4.0965e-87	RP11-4K16.2
ENSG00000253944	1.53461	8.12089e-05	0.000304462	RP11-156K13.1
ENSG00000265802	1.10986	5.65395e-09	2.87948e-08	RN7SL49P
ENSG00000281991	1.18924	1.80228e-19	1.41981e-18	TMEM265
ENSG00000272638	-1.99667	4.92352e-07	2.21778e-06	GS1-114I9.1
ENSG00000253671	2.15507	3.24896e-10	1.76747e-09	RP11-806O11.1
ENSG00000253632	2.87977	3.2408e-16	2.30108e-15	RP11-486M23.1
ENSG00000253593	1.73487	1.17316e-05	4.72938e-05	RP11-157E21.1
ENSG00000253506	3.43747	7.03162e-40	9.05265e-39	NACA2
ENSG00000255201	-1.12156	8.22276e-24	7.32908e-23	RP11-350N15.4
ENSG00000262075	-1.69401	3.37759e-06	1.42807e-05	DKFZP434A062
ENSG00000253276	-0.652091	1.20465e-29	1.25871e-28	CCDC71L
ENSG00000272636	1.05163	2.07143e-26	1.97697e-25	DOC2B
ENSG00000268204	-1.11787	1.69827e-07	7.87043e-07	CTD-3214H19.6
ENSG00000251685	1.80308	7.11396e-06	2.92617e-05	UGT2B27P
ENSG00000251664	-0.782201	3.75329e-12	2.24322e-11	PCDHA12
ENSG00000251567	0.791612	7.63532e-05	0.000287229	RP11-775H9.2
ENSG00000251201	1.04542	6.46181e-18	4.85901e-17	TMED7-TICAM2
ENSG00000251191	4.61996	2.37409e-52	3.83097e-51	LINC00589
ENSG00000251090	1.36147	0.000168624	0.000612624	OR5AC4P
ENSG00000250966	-1.44826	0.000101438	0.000377833	RP11-402J6.3
ENSG00000250942	-1.51145	8.94321e-13	5.49947e-12	ENPP7P11
ENSG00000250903	0.661617	7.78745e-13	4.80336e-12	GMDS-AS1
ENSG00000261687	2.02245	2.56644e-08	1.25483e-07	RP11-473C18.3
ENSG00000250722	0.76233	4.65812e-120	1.60179e-118	SEPP1
ENSG00000273749	1.37079	0	0	CYFIP1
ENSG00000250685	-0.909691	8.54879e-06	3.49379e-05	RP11-486L19.2
ENSG00000250588	0.686022	0.000232484	0.000833185	IQCJ-SCHIP1
ENSG00000250366	-0.959476	6.42786e-06	2.65412e-05	TUNAR
ENSG00000250303	-2.45317	1.28878e-21	1.08038e-20	RP11-356J5.12
ENSG00000250266	2.81541	9.86495e-14	6.34779e-13	LINC01612
ENSG00000272727	2.1208	2.50302e-08	1.22469e-07	RP11-142A22.4
ENSG00000269699	-0.779343	1.64681e-05	6.55898e-05	ZIM2
ENSG00000250230	1.21591	1.79367e-10	9.90348e-10	RP11-855O10.2
ENSG00000279312	1.71228	1.41958e-16	1.02102e-15	RP3-331H24.7
ENSG00000250159	-1.93165	1.69588e-06	7.34183e-06	RP11-381K20.2
ENSG00000250120	-1.2115	6.04299e-116	2.00193e-114	PCDHA10
ENSG00000250067	0.73144	1.79517e-06	7.75607e-06	YJEFN3
ENSG00000250021	0.62027	8.70329e-11	4.88301e-10	C15orf38-AP3S2
ENSG00000268635	-0.756518	8.76384e-11	4.91619e-10	RP11-739B23.1
ENSG00000249885	1.58952	6.94976e-05	0.000262617	ARHGEF38-IT1
ENSG00000261275	1.49456	6.96538e-05	0.000263178	RP11-760D2.11
ENSG00000249784	-1.07908	5.19702e-05	0.000199009	SCARNA22
ENSG00000256940	1.28352	5.62097e-05	0.000214574	RP11-783K16.5
ENSG00000249464	4.42387	4.1374e-185	2.28734e-183	LINC01091
ENSG00000249409	0.603808	3.64434e-07	1.65545e-06	RP11-501E14.1
ENSG00000255545	4.29525	1.27987e-83	3.08631e-82	RP11-627G23.1
ENSG00000261488	-3.6354	3.88907e-25	3.58727e-24	RP11-757F18.5
ENSG00000249014	-0.938954	2.53947e-05	9.97429e-05	HMGN2P4
ENSG00000281864	0.667696	0.000123214	0.000455051	AC068152.1
ENSG00000250413	3.14373	7.2568e-24	6.47987e-23	RP11-448G15.1
ENSG00000248527	0.857452	5.37855e-06	2.23345e-05	MTATP6P1
ENSG00000248485	6.65208	8.09059e-97	2.26372e-95	PCP4L1
ENSG00000248383	-0.728866	9.69285e-16	6.75807e-15	PCDHAC1
ENSG00000275011	3.90398	1.57378e-32	1.75081e-31	RP11-599B13.9
ENSG00000279773	2.07406	4.99937e-21	4.11473e-20	AL050303.10
ENSG00000248050	1.66737	1.95827e-05	7.75705e-05	RP11-422N16.3
ENSG00000248015	-1.12504	2.75854e-07	1.26326e-06	AC005329.7
ENSG00000247746	-1.87962	9.33799e-63	1.76238e-61	USP51
ENSG00000247317	1.6588	1.51522e-35	1.79359e-34	RP11-273G15.2
ENSG00000246379	-1.28544	1.43761e-06	6.26677e-06	RP11-461O7.1
ENSG00000246223	-1.04441	1.43236e-09	7.55324e-09	LINC01550
ENSG00000245904	1.39502	1.42758e-13	9.14499e-13	RP11-796E2.4
ENSG00000245848	1.14885	1.88592e-109	5.89554e-108	CEBPA
ENSG00000245532	1.19546	1.02277e-39	1.31085e-38	NEAT1
ENSG00000261594	-1.69228	2.7856e-05	0.000109074	TPBGL
ENSG00000244757	-2.41983	3.94476e-11	2.25031e-10	RP11-45A16.4
ENSG00000244671	0.942776	1.7854e-07	8.26527e-07	RN7SL280P
ENSG00000282221	1.34673	0.000164568	0.000598963	RP11-27G14.4
ENSG00000244588	6.07852	3.88234e-115	1.27875e-113	RAD21L1
ENSG00000244567	-0.983759	0.000255329	0.000910789	AC096772.6
ENSG00000244514	1.23733	2.88124e-09	1.4928e-08	RN7SL125P
ENSG00000244457	-1.52112	0.000135645	0.000498334	ENO1P1
ENSG00000244405	4.95237	2.29028e-163	1.09688e-161	ETV5
ENSG00000276043	-0.865004	1.8115e-141	7.38057e-140	UHRF1
ENSG00000244270	-1.16203	8.34963e-12	4.90466e-11	RPL32P29
ENSG00000277925	0.660304	1.16422e-16	8.39994e-16	Telomerase-vert
ENSG00000244219	0.89703	4.38359e-07	1.98106e-06	GS1-259H13.2
ENSG00000244176	2.39967	1.87974e-10	1.0367e-09	RP11-810P12.1
ENSG00000244091	0.826248	5.6095e-08	2.68804e-07	RN7SL483P
ENSG00000243989	1.19298	7.219e-81	1.68184e-79	ACY1
ENSG00000243978	-1.3812	0.000150643	0.000550773	RGAG1
ENSG00000243789	0.917096	5.89128e-11	3.33361e-10	JMJD7
ENSG00000243742	0.88603	3.35491e-17	2.4656e-16	RPLP0P2
ENSG00000262768	-1.33604	4.47797e-05	0.000172318	RP11-353N14.1
ENSG00000243554	0.833499	4.73378e-05	0.000181736	AC004967.7
ENSG00000243544	0.81324	4.94632e-06	2.05869e-05	RN7SL172P
ENSG00000243446	0.83411	2.88466e-07	1.31978e-06	RN7SL284P
ENSG00000260257	-0.619028	4.40441e-11	2.50545e-10	RP5-1085F17.3
ENSG00000243420	0.846972	1.97512e-05	7.82111e-05	RN7SL734P
ENSG00000243267	1.34808	3.97901e-07	1.80201e-06	RN7SL614P
ENSG00000279154	0.838116	0.00015628	0.000570671	RP11-345K9.2
ENSG00000242861	0.973343	2.38437e-09	1.24154e-08	RP11-285F7.2
ENSG00000242575	4.366	1.50085e-49	2.2958e-48	AC012501.3
ENSG00000278709	-1.60065	1.62368e-24	1.4763e-23	NKILA
ENSG00000242267	-0.878532	0.000130602	0.000480835	SKINTL
ENSG00000250423	-1.31037	0.00010492	0.000390168	KIAA1210
ENSG00000242265	2.26277	0	0	PEG10
ENSG00000272841	1.22759	6.86123e-18	5.15146e-17	RP3-428L16.2
ENSG00000242113	1.05406	1.0156e-07	4.78207e-07	RN7SL124P
ENSG00000242111	2.43535	2.39685e-10	1.31389e-09	TOPORSLP1
ENSG00000242028	1.13364	1.29548e-36	1.56583e-35	HYPK
ENSG00000241839	-1.13584	6.0024e-10	3.22709e-09	PLEKHO2
ENSG00000253741	1.04833	9.52046e-16	6.64057e-15	CTD-2292P10.4
ENSG00000241679	1.51365	0.000130282	0.000479814	RP11-80H8.4
ENSG00000241529	0.657706	1.10059e-06	4.8409e-06	RN7SL767P
ENSG00000241484	-1.02398	1.19003e-93	3.2247e-92	ARHGAP8
ENSG00000267152	0.604768	0.000214575	0.000771417	CTD-2528L19.6
ENSG00000241322	1.40938	1.78258e-05	7.08234e-05	CDRT1
ENSG00000272323	-1.06792	7.90297e-11	4.44415e-10	CTD-2517O10.6
ENSG00000272622	-2.30871	1.03213e-10	5.76166e-10	RP11-395N3.2
ENSG00000244968	-2.79756	1.71131e-48	2.57987e-47	LIFR-AS1
ENSG00000240809	1.08521	4.97202e-05	0.000190584	RP11-550F7.1
ENSG00000240771	-0.616811	2.54636e-13	1.61018e-12	ARHGEF25
ENSG00000280064	0.649909	7.33091e-27	7.08311e-26	RP11-205M5.3
ENSG00000240499	1.65554	1.45565e-06	6.34257e-06	RP5-1101C3.1
ENSG00000240481	0.964294	6.50337e-06	2.68427e-05	RN7SL38P
ENSG00000240280	-1.12883	1.24675e-10	6.93272e-10	TCAM1P
ENSG00000240253	-1.48704	5.38411e-06	2.23522e-05	FAR2P3
ENSG00000275183	1.48133	6.8817e-38	8.53376e-37	LENG9
ENSG00000271367	-2.80723	1.57431e-15	1.08947e-14	RP3-483K16.4
ENSG00000239677	-1.82423	2.71875e-07	1.2457e-06	PDZRN3-AS1
ENSG00000239523	0.729409	0.000195501	0.000705423	MYLK-AS1
ENSG00000239440	-2.33119	1.44258e-10	8.00096e-10	RP11-260O18.1
ENSG00000239316	1.22774	1.65677e-07	7.68534e-07	RN7SL11P
ENSG00000239268	-1.53715	5.31409e-05	0.000203311	RP11-384F7.2
ENSG00000239264	1.21512	0	0	TXNDC5
ENSG00000239219	1.01441	0.000159432	0.000581562	RP11-379K17.4
ENSG00000239218	-0.793811	1.65505e-23	1.46567e-22	RPS20P22
ENSG00000239211	1.04765	4.5621e-14	2.97849e-13	RN7SL563P
ENSG00000258203	-2.8354	3.03575e-39	3.85205e-38	RP1-228P16.3
ENSG00000244642	0.661416	1.88597e-07	8.71795e-07	RN7SL396P
ENSG00000262294	1.6222	7.42006e-06	3.04697e-05	RP11-1260E13.2
ENSG00000238622	-0.833051	7.21458e-06	2.96543e-05	SNORD97
ENSG00000259780	1.20129	0.000218756	0.000786201	RP11-304L19.12
ENSG00000238197	-0.696844	1.57752e-12	9.58754e-12	PAXBP1-AS1
ENSG00000261587	-1.65358	2.62804e-07	1.20542e-06	TMEM249
ENSG00000238145	4.29883	3.15868e-49	4.80183e-48	RP11-346M5.1
ENSG00000238117	3.95503	1.56382e-34	1.81182e-33	AP004372.1
ENSG00000238045	-0.660597	6.66196e-32	7.30267e-31	AC009133.12
ENSG00000238034	-2.00449	7.5384e-07	3.35434e-06	RP5-1185K9.1
ENSG00000261664	1.54412	5.40422e-27	5.23922e-26	TTC39A-AS1
ENSG00000237943	1.58665	4.50586e-08	2.1719e-07	PRKCQ-AS1
ENSG00000237863	-1.40906	3.01179e-06	1.2786e-05	RP6-24A23.3
ENSG00000237807	2.50561	2.74036e-26	2.60744e-25	RP11-400K9.4
ENSG00000237750	-3.00103	7.50331e-15	5.06709e-14	AC007740.1
ENSG00000279406	-1.34117	1.54008e-16	1.10515e-15	RP11-327E2.5
ENSG00000237742	-3.61936	9.3612e-52	1.48754e-50	RP11-624M8.1
ENSG00000237541	2.97765	1.02505e-250	8.31329e-249	HLA-DQA2
ENSG00000237517	-1.25067	1.38917e-34	1.61166e-33	DGCR5
ENSG00000242855	1.25467	6.93014e-06	2.85295e-05	RN7SL496P
ENSG00000237476	-1.99272	6.73075e-07	3.00858e-06	XXbac-B135H6.15
ENSG00000242173	-2.58239	2.32192e-22	1.99311e-21	ARHGDIG
ENSG00000237440	-0.646858	2.71212e-35	3.19389e-34	ZNF737
ENSG00000237379	1.84357	3.53068e-07	1.60552e-06	CBX1P3
ENSG00000260303	1.54689	9.21e-05	0.000344019	RP11-203B7.2
ENSG00000271727	-1.7723	1.74912e-19	1.37857e-18	RP11-532F6.4
ENSG00000256663	-0.913087	2.60976e-08	1.2751e-07	RP11-424C20.2
ENSG00000237172	-0.637229	1.94409e-06	8.37738e-06	B3GNT9
ENSG00000237021	-1.42154	5.59659e-12	3.31353e-11	RP3-486I3.7
ENSG00000236989	0.853604	6.88563e-05	0.000260336	AC142119.1
ENSG00000236901	-1.10837	3.3961e-52	5.45709e-51	MIR600HG
ENSG00000236882	1.11297	0.000135464	0.000497725	LINC01554
ENSG00000236830	0.784752	2.63948e-22	2.26118e-21	CBR3-AS1
ENSG00000236824	0.76573	1.67986e-38	2.10669e-37	BCYRN1
ENSG00000274026	0.617664	1.00232e-05	4.06305e-05	FAM27E3
ENSG00000236699	4.58694	2.81615e-193	1.66105e-191	ARHGEF38
ENSG00000236609	-0.899303	5.1826e-23	4.53933e-22	ZNF853
ENSG00000236581	-2.14542	3.57197e-10	1.93921e-09	STARD13-AS
ENSG00000236536	-1.37226	5.20032e-05	0.000199113	AC003986.7
ENSG00000236514	-0.714203	7.80933e-05	0.00029339	RP11-162G10.5
ENSG00000236431	-1.69721	1.26728e-06	5.5457e-06	AC009237.11
ENSG00000236385	1.73228	2.9936e-08	1.45933e-07	RP11-114M1.2
ENSG00000236289	3.58006	2.51661e-34	2.90594e-33	GACAT3
ENSG00000236200	-0.710744	5.98591e-05	0.000227747	KDM4A-AS1
ENSG00000273319	1.20517	0.000114591	0.000424478	RP11-138A9.2
ENSG00000235961	2.51966	4.13425e-12	2.46428e-11	PNMA6A
ENSG00000235944	0.849776	6.65802e-07	2.97762e-06	ZNF815P
ENSG00000235823	1.12073	1.24637e-35	1.47739e-34	OLMALINC
ENSG00000235713	1.95851	3.77693e-07	1.71297e-06	RP4-604G5.3
ENSG00000235631	1.53203	3.59938e-05	0.000139729	RNF148
ENSG00000235584	-1.82592	1.30999e-189	7.52033e-188	AC008268.1
ENSG00000235568	1.55073	5.46049e-32	5.99904e-31	NFAM1
ENSG00000235478	-1.95518	1.8964e-08	9.35201e-08	AC006946.15
ENSG00000235501	1.16049	1.77787e-16	1.27419e-15	RP4-639F20.1
ENSG00000235343	5.08791	2.24589e-69	4.61071e-68	AC005301.8
ENSG00000235295	1.32758	0.000191144	0.000690502	FLJ41941
ENSG00000274370	-1.31093	6.01678e-05	0.000228845	AC144831.3
ENSG00000235209	-1.57914	1.05131e-12	6.44753e-12	CTA-150C2.13
ENSG00000253882	-0.654414	4.01872e-12	2.39749e-11	RP11-61L23.2
ENSG00000235169	1.52651	5.06994e-41	6.71831e-40	SMIM1
ENSG00000235123	4.14103	2.16221e-99	6.17541e-98	DSCAM-AS1
ENSG00000235092	-0.661208	0.00015996	0.000583301	ID2-AS1
ENSG00000235091	-2.13585	2.78912e-76	6.16385e-75	WI2-85898F10.1
ENSG00000235027	1.34901	9.10199e-17	6.59066e-16	AC068580.6
ENSG00000235007	-2.20516	4.52325e-09	2.31874e-08	RP11-344B5.4
ENSG00000235996	-1.67186	4.74031e-06	1.97774e-05	RP11-97N19.2
ENSG00000234752	-1.68299	9.16567e-11	5.13072e-10	RP11-428L9.1
ENSG00000234684	0.60336	8.26527e-06	3.38355e-05	SDCBP2-AS1
ENSG00000260963	1.53794	0.000123288	0.000455274	RP11-297L17.2
ENSG00000234604	1.16448	3.43218e-05	0.000133555	RP1-206D15.5
ENSG00000234518	1.48109	0.000207692	0.000747685	PTGES3P1
ENSG00000234484	1.98136	3.79658e-07	1.7212e-06	RP1-55C23.7
ENSG00000241388	2.46347	8.45611e-68	1.70146e-66	HNF1A-AS1
ENSG00000243709	2.48323	1.03532e-38	1.30218e-37	LEFTY1
ENSG00000240541	-2.87162	2.53639e-17	1.87044e-16	TM4SF1-AS1
ENSG00000250644	1.4435	5.30931e-11	3.00826e-10	RP11-295K3.1
ENSG00000234115	-1.32321	5.42094e-05	0.000207283	RP11-288G3.4
ENSG00000234085	2.87255	1.13205e-16	8.17468e-16	RP11-368M16.7
ENSG00000238113	-0.98524	4.30504e-07	1.94658e-06	LINC01410
ENSG00000234062	-0.634576	5.95506e-05	0.000226648	RP11-308D16.2
ENSG00000233966	-0.594408	4.98414e-07	2.24391e-06	UBE2SP1
ENSG00000233901	0.999276	9.08163e-11	5.08533e-10	LINC01503
ENSG00000233895	0.968525	7.42198e-05	0.000279631	RP1-122P22.2
ENSG00000233871	0.729463	1.27782e-06	5.58753e-06	DLG5-AS1
ENSG00000233834	1.29253	1.37437e-12	8.37652e-12	AC005083.1
ENSG00000233728	-1.48237	1.31485e-05	5.27704e-05	RP11-109P14.9
ENSG00000250522	1.80866	2.64191e-06	1.1284e-05	AC004066.3
ENSG00000233718	1.11441	5.26168e-16	3.70631e-15	MYCNOS
ENSG00000233396	0.799645	2.4294e-09	1.26461e-08	RP11-458D21.1
ENSG00000253426	0.952437	4.41601e-06	1.84691e-05	RP11-10A14.4
ENSG00000233255	3.39768	2.00535e-28	2.02401e-27	AC019181.2
ENSG00000233237	2.25274	2.70068e-85	6.61926e-84	LINC00472
ENSG00000233198	-0.862434	6.22955e-05	0.000236519	RNF224
ENSG00000233154	-0.975952	1.34673e-06	5.88213e-06	RP4-655J12.4
ENSG00000233028	-3.45014	7.8859e-19	6.10748e-18	RP4-725G10.4
ENSG00000280587	2.89036	7.39051e-46	1.0705e-44	LINC01348
ENSG00000232956	0.9382	1.09699e-70	2.28896e-69	SNHG15
ENSG00000232767	-1.00622	1.87178e-13	1.1915e-12	RP11-498B4.5
ENSG00000242101	0.973773	7.14764e-05	0.000269709	RN7SL416P
ENSG00000232675	-1.65816	5.76623e-06	2.38867e-05	RP4-718D20.3
ENSG00000232653	1.95016	7.71533e-39	9.71821e-38	GOLGA8N
ENSG00000232633	-1.3115	6.71064e-05	0.000253972	CTD-2201G3.1
ENSG00000232504	2.14001	8.76583e-16	6.12789e-15	ST3GAL5-AS1
ENSG00000272189	0.900041	1.01622e-13	6.53663e-13	RP3-325F22.5
ENSG00000232433	1.78194	1.69502e-06	7.33906e-06	GXYLT1P3
ENSG00000232354	1.30837	6.93408e-25	6.3483e-24	VIPR1-AS1
ENSG00000272695	-1.38554	4.49854e-07	2.0306e-06	GAS6-AS2
ENSG00000232300	-1.24834	1.7958e-23	1.58664e-22	FAM215B
ENSG00000232233	1.55853	2.57594e-33	2.91761e-32	RP11-573D15.2
ENSG00000232124	0.685127	4.06898e-18	3.08126e-17	AP001057.1
ENSG00000244187	0.941259	6.04588e-53	9.85307e-52	TMEM141
ENSG00000265148	-0.733527	3.93419e-05	0.000152091	BZRAP1-AS1
ENSG00000279286	1.39487	1.2704e-07	5.93149e-07	RP11-248B24.1
ENSG00000231982	2.27507	1.12535e-27	1.11456e-26	RP11-573D15.1
ENSG00000231918	1.18118	3.97695e-05	0.000153658	AC007682.1
ENSG00000231863	1.87284	2.4985e-06	1.06834e-05	RP3-428L16.1
ENSG00000231789	-1.18745	1.88067e-07	8.6958e-07	PIK3CD-AS2
ENSG00000231764	-2.64376	1.91511e-39	2.43997e-38	DLX6-AS1
ENSG00000245466	1.83645	2.95955e-06	1.25766e-05	CTD-2540L5.6
ENSG00000231551	-1.25995	0.000120615	0.000445978	RP11-495P10.1
ENSG00000233723	-2.14456	3.06674e-28	3.08351e-27	LINC01122
ENSG00000231483	2.84272	6.05147e-20	4.8416e-19	RP11-336A10.5
ENSG00000231439	-0.8777	4.54695e-12	2.70419e-11	WASIR2
ENSG00000231434	-1.18225	0.000258283	0.000920752	RP11-144L1.8
ENSG00000231312	0.917505	1.44123e-21	1.20671e-20	AC007246.3
ENSG00000238249	-0.775124	1.59814e-05	6.37383e-05	HMGN2P17
ENSG00000273654	1.25498	0.000192802	0.000696123	CTB-52I2.4
ENSG00000231188	1.51343	4.33579e-05	0.000167016	RP11-34D15.2
ENSG00000254793	1.44437	9.05624e-06	3.68977e-05	FDPSP4
ENSG00000231156	-2.17475	7.74403e-08	3.67353e-07	AC093702.1
ENSG00000139613	-0.61453	1.39546e-42	1.90797e-41	SMARCC2
ENSG00000126803	0.625214	2.4001e-18	1.82796e-17	HSPA2
ENSG00000181885	0.855857	1.42587e-85	3.51479e-84	CLDN7
ENSG00000181773	0.735653	3.74913e-07	1.70103e-06	GPR3
ENSG00000181523	0.741279	2.73977e-34	3.15937e-33	SGSH
ENSG00000181444	-0.781962	7.92494e-17	5.75412e-16	ZNF467
ENSG00000223764	-4.25764	6.50264e-184	3.56629e-182	RP11-54O7.3
ENSG00000137965	3.46577	1.80707e-21	1.50861e-20	IFI44
ENSG00000224805	-0.813244	4.75233e-07	2.14235e-06	LINC00853
ENSG00000150637	0.711079	7.09114e-05	0.000267694	CD226
ENSG00000181135	0.68154	1.1859e-13	7.61667e-13	ZNF707
ENSG00000230563	-1.47223	0.000114142	0.000422952	RP5-828H9.1
ENSG00000180964	1.41256	2.27247e-137	8.98201e-136	TCEAL8
ENSG00000180902	0.71789	2.06666e-14	1.36824e-13	D2HGDH
ENSG00000180879	1.39128	0	0	SSR4
ENSG00000169704	1.49534	0.000109757	0.000407318	GP9
ENSG00000138642	-1.7822	2.00821e-19	1.57951e-18	HERC6
ENSG00000169047	-1.83083	4.81204e-258	4.00658e-256	IRS1
ENSG00000145103	0.959313	0.000158474	0.000578191	ILDR1
ENSG00000148935	1.22574	2.24716e-13	1.42571e-12	GAS2
ENSG00000108852	-1.79598	6.73019e-208	4.32582e-206	MPP2
ENSG00000186094	-0.830535	1.03367e-09	5.48447e-09	AGBL4
ENSG00000180488	0.608399	2.03673e-48	3.06105e-47	FAM73A
ENSG00000085831	0.732447	2.71982e-116	9.05385e-115	TTC39A
ENSG00000223802	-1.07376	2.29254e-32	2.53892e-31	CERS1
ENSG00000180178	-2.00801	2.74517e-33	3.10623e-32	FAR2P1
ENSG00000125734	0.676824	2.35941e-45	3.38195e-44	GPR108
ENSG00000112245	0.593471	7.18721e-10	3.84784e-09	PTP4A1
ENSG00000180071	1.51121	3.80385e-05	0.000147268	ANKRD18A
ENSG00000184897	-0.70312	5.89844e-39	7.44876e-38	H1FX
ENSG00000114315	2.18435	0	0	HES1
ENSG00000103942	-1.44309	0	0	HOMER2
ENSG00000255189	1.70848	3.70252e-10	2.00913e-09	GLYATL1P1
ENSG00000173621	-1.52874	1.65711e-85	4.07313e-84	LRFN4
ENSG00000231240	-2.72938	7.43344e-15	5.02089e-14	KLF2P1
ENSG00000179841	-1.05417	7.73149e-14	4.99742e-13	AKAP5
ENSG00000233184	1.24974	1.74045e-19	1.37205e-18	RP11-421L21.3
ENSG00000102221	-0.890165	1.64826e-59	2.97682e-58	JADE3
ENSG00000168505	-1.55027	0.000113611	0.000421168	GBX2
ENSG00000179477	2.48631	7.07865e-12	4.16947e-11	ALOX12B
ENSG00000179456	3.11385	7.76906e-189	4.43043e-187	ZBTB18
ENSG00000179403	1.64196	1.58422e-127	5.82014e-126	VWA1
ENSG00000179222	1.7478	7.86536e-264	6.82996e-262	MAGED1
ENSG00000164985	-0.931073	1.82026e-194	1.0848e-192	PSIP1
ENSG00000186704	0.980863	0.000213037	0.000766127	DTX2P1
ENSG00000229619	1.27565	1.45198e-05	5.8125e-05	MBNL1-AS1
ENSG00000179104	-0.768149	1.7351e-36	2.09131e-35	TMTC2
ENSG00000179051	-0.796136	8.53871e-138	3.38663e-136	RCC2
ENSG00000196748	-1.74347	3.27611e-06	1.38704e-05	CLPSL2
ENSG00000179023	-1.68267	1.1324e-14	7.59062e-14	KLHDC7A
ENSG00000178922	-0.620969	2.93687e-17	2.16299e-16	HYI
ENSG00000178882	-2.02933	1.21899e-13	7.82623e-13	FAM101A
ENSG00000178726	0.736708	1.79528e-05	7.13114e-05	THBD
ENSG00000170965	-1.28308	6.4196e-18	4.82832e-17	PLAC1
ENSG00000178607	1.84185	1.42122e-178	7.53029e-177	ERN1
ENSG00000178538	5.18802	4.0758e-92	1.07977e-90	CA8
ENSG00000178537	0.610834	6.26267e-17	4.55873e-16	SLC25A20
ENSG00000110104	0.733675	9.99586e-20	7.93462e-19	CCDC86
ENSG00000126215	0.805182	5.01759e-63	9.52207e-62	XRCC3
ENSG00000226777	-2.76269	1.13461e-28	1.15534e-27	KIAA0125
ENSG00000178209	0.625288	4.37005e-21	3.60712e-20	PLEC
ENSG00000207205	2.57707	2.65684e-15	1.82284e-14	RNVU1-15
ENSG00000096060	0.961574	2.57175e-46	3.7552e-45	FKBP5
ENSG00000178162	-2.28031	3.28692e-37	4.01803e-36	FAR2P2
ENSG00000178149	1.06903	6.9228e-150	3.00194e-148	DALRD3
ENSG00000276203	0.841342	6.11429e-10	3.28416e-09	ANKRD20A3
ENSG00000200314	-1.39931	1.42455e-05	5.70535e-05	Y_RNA
ENSG00000077157	-0.816861	8.20562e-32	8.98334e-31	PPP1R12B
ENSG00000124507	-0.752057	8.60921e-08	4.07214e-07	PACSIN1
ENSG00000214128	2.52673	2.42816e-68	4.91448e-67	TMEM213
ENSG00000177951	0.602232	2.6517e-29	2.74651e-28	BET1L
ENSG00000177830	0.682437	9.96159e-60	1.80194e-58	CHID1
ENSG00000177700	0.701941	5.10854e-41	6.76685e-40	POLR2L
ENSG00000143079	-0.96896	3.5358e-36	4.23791e-35	CTTNBP2NL
ENSG00000177685	0.739701	5.60117e-30	5.89555e-29	CRACR2B
ENSG00000171631	-1.47509	4.38895e-23	3.84909e-22	P2RY6
ENSG00000167552	-1.51715	0	0	TUBA1A
ENSG00000048342	-0.9818	7.62607e-34	8.73834e-33	CC2D2A
ENSG00000226124	1.61286	7.47377e-21	6.12052e-20	FTCDNL1
ENSG00000167131	-0.643611	0.000124055	0.00045786	CCDC103
ENSG00000177335	-0.859343	0.000136356	0.000500733	C8orf31
ENSG00000109466	3.4114	1.99135e-127	7.30807e-126	KLHL2
ENSG00000108861	0.812799	5.41949e-97	1.52255e-95	DUSP3
ENSG00000205002	-2.4618	3.70208e-40	4.79485e-39	AARD
ENSG00000177156	0.809172	4.32541e-137	1.70571e-135	TALDO1
ENSG00000177058	0.604757	9.99145e-22	8.41274e-21	SLC38A9
ENSG00000049860	1.97456	0	0	HEXB
ENSG00000140545	-1.74864	1.78172e-53	2.93009e-52	MFGE8
ENSG00000266903	-0.773069	8.72023e-09	4.38973e-08	CTB-171A8.1
ENSG00000176890	-0.668183	6.70321e-25	6.1402e-24	TYMS
ENSG00000159176	-1.54586	0	0	CSRP1
ENSG00000176788	-1.33166	1.96505e-46	2.87418e-45	BASP1
ENSG00000176749	-2.29997	3.93772e-105	1.18466e-103	CDK5R1
ENSG00000176563	1.01993	1.14017e-15	7.92544e-15	CNTD1
ENSG00000182718	-0.851313	2.99254e-67	5.97587e-66	ANXA2
ENSG00000176531	-0.906217	2.85289e-52	4.5971e-51	PHLDB3
ENSG00000176490	-3.66612	7.77256e-259	6.5189e-257	DIRAS1
ENSG00000176371	-0.844688	7.06104e-28	7.03383e-27	ZSCAN2
ENSG00000176273	-0.741004	7.55147e-08	3.58663e-07	SLC35G1
ENSG00000176170	1.07445	1.8766e-06	8.09366e-06	SPHK1
ENSG00000197253	-1.11538	0.000224995	0.000807693	TPSB2
ENSG00000176148	0.586778	1.53395e-23	1.35984e-22	TCP11L1
ENSG00000176125	0.725102	2.10494e-05	8.31603e-05	UFSP1
ENSG00000176046	4.5824	0	0	NUPR1
ENSG00000175899	-1.79984	5.24154e-12	3.10653e-11	A2M
ENSG00000167085	0.652901	2.32852e-67	4.65799e-66	PHB
ENSG00000204140	-2.40385	1.48767e-10	8.24574e-10	CLPSL1
ENSG00000133424	-1.37026	1.5531e-254	1.27767e-252	LARGE
ENSG00000136436	1.30047	0	0	CALCOCO2
ENSG00000253051	-2.05149	2.88211e-07	1.31879e-06	SNORA31
ENSG00000175591	-0.879304	1.33011e-12	8.11396e-12	P2RY2
ENSG00000175556	-1.59855	5.36888e-06	2.22971e-05	LONRF3
ENSG00000175471	2.98659	1.12758e-137	4.46706e-136	MCTP1
ENSG00000176406	-0.60778	7.84835e-37	9.51626e-36	RIMS2
ENSG00000175318	2.25774	2.42358e-12	1.46056e-11	GRAMD2
ENSG00000188993	-1.74181	2.93275e-06	1.24725e-05	LRRC66
ENSG00000175198	0.842127	4.15842e-43	5.74279e-42	PCCA
ENSG00000182013	-0.922892	1.64685e-109	5.1529e-108	PNMAL1
ENSG00000175175	-2.63529	2.99845e-58	5.30117e-57	PPM1E
ENSG00000196421	-1.51567	1.03422e-33	1.18191e-32	LINC00176
ENSG00000163808	-0.595715	9.47939e-55	1.59788e-53	KIF15
ENSG00000174951	-0.807525	2.75968e-43	3.8265e-42	FUT1
ENSG00000174599	0.594433	1.84074e-13	1.17196e-12	TRAM1L1
ENSG00000174500	-3.77084	2.33137e-31	2.53058e-30	GCSAM
ENSG00000174405	0.652005	1.82836e-10	1.00885e-09	LIG4
ENSG00000280753	-1.0684	2.62363e-05	0.000102942	AC044907.1
ENSG00000177731	0.744774	4.20971e-83	1.00878e-81	FLII
ENSG00000101695	0.747232	4.51673e-15	3.07132e-14	RNF125
ENSG00000063015	-3.48184	1.05693e-60	1.93834e-59	SEZ6
ENSG00000112306	1.32154	4.02275e-297	4.11698e-295	RPS12
ENSG00000169599	1.00259	3.21248e-66	6.33779e-65	NFU1
ENSG00000174007	-0.596368	1.23116e-08	6.14545e-08	CEP19
ENSG00000108639	1.40809	1.15291e-280	1.0832e-278	SYNGR2
ENSG00000173890	0.672553	7.63554e-68	1.53726e-66	GPR160
ENSG00000173868	2.64897	2.64559e-25	2.4508e-24	PHOSPHO1
ENSG00000173846	0.706923	5.05426e-09	2.58325e-08	PLK3
ENSG00000132692	-1.85288	4.57605e-06	1.91152e-05	BCAN
ENSG00000002933	0.600641	7.43368e-20	5.9254e-19	TMEM176A
ENSG00000173641	1.24751	3.39388e-06	1.43426e-05	HSPB7
ENSG00000173511	-0.640499	5.85879e-07	2.62805e-06	VEGFB
ENSG00000124786	0.682477	6.92438e-21	5.67601e-20	SLC35B3
ENSG00000173457	0.727886	4.21081e-38	5.24437e-37	PPP1R14B
ENSG00000173409	0.618773	1.04541e-21	8.79367e-21	ARV1
ENSG00000243350	-1.18971	2.49503e-16	1.7778e-15	RP11-379F12.3
ENSG00000173334	1.09333	1.48682e-74	3.23591e-73	TRIB1
ENSG00000173267	-1.38089	2.91246e-07	1.33215e-06	SNCG
ENSG00000146666	-1.68247	4.48774e-06	1.87555e-05	LINC00525
ENSG00000173088	1.15453	5.84612e-08	2.79831e-07	C10orf131
ENSG00000225953	-1.79493	7.59082e-09	3.83466e-08	SATB2-AS1
ENSG00000172935	-1.14008	7.85302e-19	6.0834e-18	MRGPRF
ENSG00000172927	1.5406	5.48806e-12	3.24984e-11	MYEOV
ENSG00000172819	-0.66004	1.38493e-26	1.32767e-25	RARG
ENSG00000180304	-0.631519	9.40654e-32	1.02915e-30	OAZ2
ENSG00000172731	-0.770331	1.62181e-15	1.12189e-14	LRRC20
ENSG00000152217	-3.21906	0	0	SETBP1
ENSG00000172725	0.813037	7.3734e-112	2.36299e-110	CORO1B
ENSG00000172551	3.37243	1.78155e-152	7.84407e-151	MUCL1
ENSG00000104419	-2.54068	5.86955e-47	8.64024e-46	NDRG1
ENSG00000163281	0.880891	1.13661e-21	9.55149e-21	GNPDA2
ENSG00000177868	-1.47777	1.39363e-70	2.90265e-69	SVBP
ENSG00000165644	1.84686	3.78707e-120	1.30487e-118	COMTD1
ENSG00000172269	0.74793	1.53945e-22	1.32941e-21	DPAGT1
ENSG00000172232	-2.18762	3.05586e-15	2.09077e-14	AZU1
ENSG00000172216	0.994946	3.02111e-48	4.53062e-47	CEBPB
ENSG00000176884	-1.63591	2.69578e-37	3.30245e-36	GRIN1
ENSG00000105993	-0.64257	5.93173e-57	1.03017e-55	DNAJB6
ENSG00000172197	-1.81399	3.82192e-138	1.52288e-136	MBOAT1
ENSG00000151623	0.810974	4.33106e-78	9.74687e-77	NR3C2
ENSG00000143409	-0.672162	5.08878e-40	6.57108e-39	FAM63A
ENSG00000077063	0.844635	3.423e-190	1.96834e-188	CTTNBP2
ENSG00000137547	0.77565	8.61764e-42	1.15711e-40	MRPL15
ENSG00000171877	-0.905722	7.02639e-10	3.76408e-09	FRMD5
ENSG00000139438	0.642923	1.93435e-22	1.66582e-21	FAM222A
ENSG00000163939	-0.852688	1.1097e-85	2.73739e-84	PBRM1
ENSG00000171735	-0.785385	4.4867e-43	6.1887e-42	CAMTA1
ENSG00000171700	-0.612971	2.07638e-10	1.14277e-09	RGS19
ENSG00000171649	-0.72536	2.43918e-19	1.9128e-18	ZIK1
ENSG00000171617	0.641305	1.89542e-51	3.00081e-50	ENC1
ENSG00000271911	-1.86924	6.77864e-13	4.19541e-12	RP11-532F6.5
ENSG00000140450	0.736224	7.26726e-17	5.28216e-16	ARRDC4
ENSG00000171503	1.51075	2.69135e-120	9.28258e-119	ETFDH
ENSG00000171488	-2.72981	1.50812e-69	3.10722e-68	LRRC8C
ENSG00000163840	-0.940983	5.17496e-97	1.45504e-95	DTX3L
ENSG00000171451	-1.20828	4.08865e-129	1.52325e-127	DSEL
ENSG00000171448	-0.674708	1.79068e-19	1.411e-18	ZBTB26
ENSG00000171435	-1.52901	1.72265e-21	1.43988e-20	KSR2
ENSG00000171368	-0.620776	1.23496e-06	5.40905e-06	TPPP
ENSG00000171345	0.843023	2.18127e-152	9.59175e-151	KRT19
ENSG00000171298	0.852198	1.06842e-70	2.23071e-69	GAA
ENSG00000205542	-1.54901	0	0	TMSB4X
ENSG00000171262	-0.702046	6.77718e-24	6.05789e-23	FAM98B
ENSG00000139144	-2.56764	3.02695e-40	3.9308e-39	PIK3C2G
ENSG00000261359	1.73459	6.71006e-16	4.71184e-15	PYCARD-AS1
ENSG00000171223	0.768004	1.6498e-36	1.98988e-35	JUNB
ENSG00000168539	4.11154	1.35638e-128	5.03148e-127	CHRM1
ENSG00000171208	-0.598414	1.31504e-62	2.47918e-61	NETO2
ENSG00000171119	-1.92895	4.21133e-21	3.47946e-20	NRTN
ENSG00000171084	0.655395	2.78212e-06	1.18694e-05	FAM86JP
ENSG00000171017	0.594517	4.59366e-18	3.47169e-17	LRRC8E
ENSG00000101144	-2.58853	4.36051e-194	2.58526e-192	BMP7
ENSG00000115307	0.910593	3.92665e-104	1.17007e-102	AUP1
ENSG00000170791	2.61192	1.67706e-191	9.74142e-190	CHCHD7
ENSG00000176225	0.910409	1.72045e-104	5.13997e-103	RTTN
ENSG00000170779	-0.611112	8.5032e-31	9.10902e-30	CDCA4
ENSG00000011258	-0.767165	4.62092e-38	5.74889e-37	MBTD1
ENSG00000182600	-1.71717	5.345e-19	4.15176e-18	C2orf82
ENSG00000170745	1.89035	1.59308e-278	1.48057e-276	KCNS3
ENSG00000170629	-1.67755	3.2525e-91	8.57698e-90	DPY19L2P2
ENSG00000170624	-1.63433	3.68134e-05	0.000142685	SGCD
ENSG00000250305	0.779485	5.15114e-35	6.03723e-34	KIAA1456
ENSG00000271880	1.66068	8.11606e-31	8.70515e-30	AGAP11
ENSG00000170577	0.641791	5.13495e-12	3.04441e-11	SIX2
ENSG00000170558	-2.6132	0	0	CDH2
ENSG00000155906	-0.967822	9.56209e-62	1.78025e-60	RMND1
ENSG00000179528	2.16531	4.06866e-45	5.81017e-44	LBX2
ENSG00000170430	0.590677	5.66798e-22	4.80297e-21	MGMT
ENSG00000279095	0.657719	4.96162e-11	2.81636e-10	AC092066.1
ENSG00000171202	0.61296	4.04818e-12	2.41382e-11	TMEM126A
ENSG00000170425	1.28176	4.4369e-07	2.00357e-06	ADORA2B
ENSG00000170421	1.05508	2.25857e-194	1.34369e-192	KRT8
ENSG00000170390	-2.02887	1.10954e-09	5.88067e-09	DCLK2
ENSG00000004777	-0.805726	6.96035e-23	6.07322e-22	ARHGAP33
ENSG00000170271	-1.4156	4.82603e-13	3.00639e-12	FAXDC2
ENSG00000125826	1.03959	5.30181e-102	1.55957e-100	RBCK1
ENSG00000104611	0.936285	0.000203275	0.000732247	SH2D4A
ENSG00000048471	0.916789	1.10179e-48	1.66391e-47	SNX29
ENSG00000177679	-5.07682	2.27752e-93	6.11853e-92	SRRM3
ENSG00000170142	-0.970027	9.0607e-86	2.23669e-84	UBE2E1
ENSG00000205336	0.908899	1.50935e-55	2.57706e-54	ADGRG1
ENSG00000270761	0.805119	6.24902e-05	0.000237206	RP11-385F7.1
ENSG00000178796	-1.60122	1.39402e-06	6.08174e-06	RIIAD1
ENSG00000171714	1.47981	9.81099e-262	8.37148e-260	ANO5
ENSG00000170099	2.1455	5.51332e-13	3.42833e-12	SERPINA6
ENSG00000170011	-2.81988	8.30779e-192	4.84204e-190	MYRIP
ENSG00000169972	0.592458	7.75803e-14	5.01363e-13	PUSL1
ENSG00000130035	-1.2041	7.80552e-09	3.94139e-08	GALNT8
ENSG00000169918	-0.759014	8.49635e-07	3.76452e-06	OTUD7A
ENSG00000162591	-0.588375	5.56966e-24	4.98371e-23	MEGF6
ENSG00000169851	1.41045	0.00024442	0.00087405	PCDH7
ENSG00000169783	-1.71596	1.41717e-72	3.0306e-71	LINGO1
ENSG00000160460	-2.30723	4.25494e-100	1.22439e-98	SPTBN4
ENSG00000169738	1.06145	9.67093e-76	2.13176e-74	DCXR
ENSG00000230393	-1.77247	4.23778e-150	1.83995e-148	AC092667.2
ENSG00000003402	0.846141	1.29938e-119	4.44596e-118	CFLAR
ENSG00000169682	0.722583	3.87039e-43	5.34932e-42	SPNS1
ENSG00000169679	-0.750306	2.78843e-119	9.51246e-118	BUB1
ENSG00000169627	0.6454	3.71381e-21	3.07431e-20	BOLA2B
ENSG00000010404	-0.808757	1.21649e-42	1.66526e-41	IDS
ENSG00000233642	-1.80748	2.2762e-07	1.04823e-06	GPR158-AS1
ENSG00000188483	1.29531	1.37124e-89	3.53735e-88	IER5L
ENSG00000260804	-1.47531	1.96756e-93	5.28996e-92	PKI55
ENSG00000170873	3.29206	0	0	MTSS1
ENSG00000169418	2.0345	2.25253e-10	1.23655e-09	NPR1
ENSG00000169403	3.27621	8.03908e-115	2.64031e-113	PTAFR
ENSG00000182489	1.02437	5.04284e-09	2.57779e-08	XKRX
ENSG00000174485	0.783919	7.05509e-63	1.33666e-61	DENND4A
ENSG00000175336	0.824058	6.04744e-05	0.000229859	APOF
ENSG00000111252	-0.96841	2.31572e-24	2.09589e-23	SH2B3
ENSG00000115318	-0.698125	3.961e-13	2.47965e-12	LOXL3
ENSG00000169193	0.94795	3.75584e-14	2.46238e-13	CCDC126
ENSG00000169071	2.66973	7.27607e-26	6.83053e-25	ROR2
ENSG00000168913	-2.54733	1.49739e-190	8.63936e-189	ENHO
ENSG00000237310	0.769058	3.66169e-08	1.77344e-07	GS1-124K5.4
ENSG00000168743	1.99794	1.91012e-248	1.53108e-246	NPNT
ENSG00000168679	-0.681596	4.31821e-10	2.33732e-09	SLC16A4
ENSG00000106299	0.883902	3.61095e-95	9.98952e-94	WASL
ENSG00000168566	-0.691245	5.84165e-49	8.83752e-48	SNRNP48
ENSG00000180354	-0.846648	1.54775e-160	7.28079e-159	MTURN
ENSG00000196562	-4.04188	0	0	SULF2
ENSG00000240891	1.54641	3.57545e-05	0.000138863	PLCXD2
ENSG00000168487	-2.08718	1.00305e-38	1.26251e-37	BMP1
ENSG00000197670	0.698174	3.07121e-09	1.58931e-08	RP4-724E16.2
ENSG00000179593	1.88362	8.50844e-07	3.76938e-06	ALOX15B
ENSG00000168461	1.90623	8.81494e-14	5.68065e-13	RAB31
ENSG00000168447	-1.999	1.1721e-14	7.85365e-14	SCNN1B
ENSG00000251322	-1.21351	3.2974e-20	2.65482e-19	SHANK3
ENSG00000168421	-0.922305	4.57798e-19	3.56403e-18	RHOH
ENSG00000168283	-2.70256	0	0	BMI1
ENSG00000178038	2.93619	1.80623e-137	7.14739e-136	ALS2CL
ENSG00000170035	2.5202	3.02352e-29	3.12597e-28	UBE2E3
ENSG00000143556	3.23464	1.42648e-19	1.12764e-18	S100A7
ENSG00000159712	2.49116	8.72611e-35	1.01648e-33	ANKRD18CP
ENSG00000168079	1.60566	1.98355e-05	7.85356e-05	SCARA5
ENSG00000136770	-0.680879	3.33776e-110	1.05299e-108	DNAJC1
ENSG00000130477	-0.884716	2.33671e-77	5.23469e-76	UNC13A
ENSG00000130038	1.73395	6.20477e-24	5.54911e-23	CRACR2A
ENSG00000174808	1.20261	6.36785e-08	3.03873e-07	BTC
ENSG00000170091	1.18273	3.86926e-46	5.63303e-45	HMP19
ENSG00000168003	1.65463	0	0	SLC3A2
ENSG00000168000	0.823827	2.91622e-67	5.82685e-66	BSCL2
ENSG00000169330	1.84551	3.74314e-60	6.80313e-59	KIAA1024
ENSG00000030582	0.895038	5.34899e-74	1.15828e-72	GRN
ENSG00000167910	1.97453	7.10769e-07	3.16965e-06	CYP7A1
ENSG00000177565	0.60714	1.4861e-114	4.86691e-113	TBL1XR1
ENSG00000174788	-1.21519	1.10537e-07	5.19478e-07	PCP2
ENSG00000177103	-4.49299	1.08073e-35	1.28192e-34	DSCAML1
ENSG00000167800	-1.69993	1.68138e-07	7.7932e-07	TBX10
ENSG00000167778	1.08708	1.64215e-66	3.25093e-65	SPRYD3
ENSG00000167775	0.929655	3.56374e-72	7.57863e-71	CD320
ENSG00000167769	1.49645	1.1729e-30	1.25295e-29	ACER1
ENSG00000265141	1.12355	4.85225e-07	2.18648e-06	RN7SL451P
ENSG00000186007	-1.67949	3.5013e-05	0.000136091	LEMD1
ENSG00000265813	0.804492	2.28355e-07	1.05134e-06	RN7SL300P
ENSG00000005379	-1.32791	5.40319e-235	4.01295e-233	BZRAP1
ENSG00000167700	0.695676	3.33093e-20	2.68119e-19	MFSD3
ENSG00000167676	-1.24796	4.69518e-10	2.53698e-09	PLIN4
ENSG00000167653	2.37504	5.03604e-27	4.88779e-26	PSCA
ENSG00000169862	-1.72368	1.62444e-164	7.83446e-163	CTNND2
ENSG00000167617	3.52526	2.13462e-41	2.85282e-40	CDC42EP5
ENSG00000211455	0.892079	1.19205e-50	1.86153e-49	STK38L
ENSG00000198855	0.76589	2.45393e-25	2.27694e-24	FICD
ENSG00000078018	-5.27328	2.3606e-145	9.92346e-144	MAP2
ENSG00000162366	6.60971	1.05224e-142	4.32815e-141	PDZK1IP1
ENSG00000134531	1.66764	3.51098e-17	2.57864e-16	EMP1
ENSG00000236283	3.6814	1.34148e-32	1.49431e-31	AC013463.2
ENSG00000167525	-0.654199	1.80855e-06	7.81291e-06	PROCA1
ENSG00000185442	0.610851	1.72296e-42	2.35109e-41	FAM174B
ENSG00000173914	-1.08855	3.29406e-46	4.80377e-45	RBM4B
ENSG00000167264	0.745535	1.09036e-11	6.37007e-11	DUS2
ENSG00000167123	0.857012	7.99181e-46	1.15614e-44	CERCAM
ENSG00000075426	0.643324	1.16036e-43	1.62003e-42	FOSL2
ENSG00000167105	2.68604	6.89415e-24	6.16084e-23	TMEM92
ENSG00000106689	-1.90147	5.26194e-16	3.70631e-15	LHX2
ENSG00000177076	-1.35692	1.00404e-36	1.21485e-35	ACER2
ENSG00000167081	-0.701644	3.03575e-19	2.37143e-18	PBX3
ENSG00000167037	1.38542	4.51547e-24	4.05096e-23	SGSM1
ENSG00000243137	2.08523	8.62649e-08	4.07919e-07	PSG4
ENSG00000167186	-0.638066	4.58236e-27	4.45626e-26	COQ7
ENSG00000167004	0.767779	2.85916e-205	1.81399e-203	PDIA3
ENSG00000088808	0.917973	7.0531e-48	1.04903e-46	PPP1R13B
ENSG00000166961	-4.00224	7.28083e-44	1.01858e-42	MS4A15
ENSG00000166902	0.702896	1.31915e-43	1.83873e-42	MRPL16
ENSG00000172201	2.55903	4.48702e-18	3.39409e-17	ID4
ENSG00000166828	-1.41627	1.14911e-07	5.39079e-07	SCNN1G
ENSG00000131236	1.19573	0	0	CAP1
ENSG00000166821	1.53845	4.62273e-122	1.62206e-120	PEX11A
ENSG00000179314	1.61456	4.07296e-05	0.000157191	WSCD1
ENSG00000108797	-1.8191	1.23954e-80	2.87806e-79	CNTNAP1
ENSG00000101605	-0.61892	0.00022179	0.000796437	MYOM1
ENSG00000166743	-0.799962	7.88461e-05	0.000296056	ACSM1
ENSG00000087253	1.66398	2.58615e-66	5.11091e-65	LPCAT2
ENSG00000152229	-0.766139	4.78878e-43	6.60007e-42	PSTPIP2
ENSG00000172345	-1.93593	2.89693e-48	4.34628e-47	STARD5
ENSG00000114784	-0.595316	1.43834e-08	7.14639e-08	EIF1B
ENSG00000243649	2.75716	0	0	CFB
ENSG00000166557	1.75604	0	0	TMED3
ENSG00000131050	1.59307	4.06545e-05	0.000156918	BPIFA2
ENSG00000166471	0.641723	3.05935e-26	2.90372e-25	TMEM41B
ENSG00000166455	-1.0135	0.00010435	0.000388174	C16orf46
ENSG00000166450	-1.24887	4.56089e-08	2.19781e-07	PRTG
ENSG00000166402	-3.13991	4.0136e-150	1.74483e-148	TUB
ENSG00000137760	0.601298	9.10657e-09	4.57952e-08	ALKBH8
ENSG00000166347	0.937764	1.24149e-195	7.43746e-194	CYB5A
ENSG00000024526	-0.787763	2.12268e-57	3.71464e-56	DEPDC1
ENSG00000166317	0.684823	0.00011288	0.000418592	SYNPO2L
ENSG00000180611	-0.605921	2.17534e-30	2.30377e-29	MB21D2
ENSG00000196839	-1.33481	4.75942e-07	2.14526e-06	ADA
ENSG00000166206	-5.10928	2.93679e-225	2.01572e-223	GABRB3
ENSG00000179846	-0.63483	0.000124952	0.000460972	NKPD1
ENSG00000166147	-1.07081	1.8687e-14	1.24028e-13	FBN1
ENSG00000131849	-0.695053	0.000175029	0.000634953	ZNF132
ENSG00000166130	1.00258	6.89428e-62	1.28774e-60	IKBIP
ENSG00000183760	-0.789965	2.46498e-07	1.13259e-06	PAPL
ENSG00000186594	0.977397	3.03539e-06	1.28814e-05	MIR22HG
ENSG00000249550	1.78471	4.74249e-27	4.60808e-26	LINC01234
ENSG00000165895	2.52556	2.63143e-24	2.37312e-23	ARHGAP42
ENSG00000165879	-0.722348	9.1678e-16	6.39848e-15	FRAT1
ENSG00000168496	-0.658794	1.23889e-98	3.53247e-97	FEN1
ENSG00000165863	-1.77164	5.52387e-200	3.37988e-198	C10orf82
ENSG00000187527	1.99799	1.16614e-07	5.46545e-07	ATP13A5
ENSG00000155324	1.17015	4.41947e-42	5.96906e-41	GRAMD3
ENSG00000125378	1.10794	1.40656e-46	2.05906e-45	BMP4
ENSG00000160360	-1.88346	5.58889e-215	3.72452e-213	GPSM1
ENSG00000112699	1.08024	4.51083e-44	6.33895e-43	GMDS
ENSG00000165929	1.27834	1.31191e-260	1.11115e-258	TC2N
ENSG00000198598	2.17745	1.1428e-21	9.59882e-21	MMP17
ENSG00000165512	1.39791	1.11888e-135	4.37215e-134	ZNF22
ENSG00000165507	-2.7681	1.83646e-30	1.95028e-29	C10orf10
ENSG00000165443	-3.79374	5.23424e-23	4.58339e-22	PHYHIPL
ENSG00000165434	-2.09366	0	0	PGM2L1
ENSG00000168491	0.712746	1.7636e-05	7.00773e-05	CCDC110
ENSG00000165275	-0.986509	7.48977e-83	1.78483e-81	TRMT10B
ENSG00000165238	-1.98022	2.81635e-29	2.91529e-28	WNK2
ENSG00000172318	2.84416	7.42914e-91	1.9531e-89	B3GALT1
ENSG00000170522	1.06526	1.05361e-100	3.05227e-99	ELOVL6
ENSG00000180447	-2.81323	3.81216e-13	2.38821e-12	GAS1
ENSG00000165124	-1.73273	2.22915e-10	1.2243e-09	SVEP1
ENSG00000054793	-0.805323	1.33405e-155	6.04401e-154	ATP9A
ENSG00000165029	1.54464	3.57523e-71	7.51016e-70	ABCA1
ENSG00000164989	-0.859109	1.82304e-31	1.98132e-30	CCDC171
ENSG00000164951	0.997655	2.65334e-136	1.04275e-134	PDP1
ENSG00000164938	-3.16375	1.15043e-93	3.11987e-92	TP53INP1
ENSG00000153208	1.60767	9.44321e-27	9.0959e-26	MERTK
ENSG00000164855	0.907892	2.0752e-66	4.1035e-65	TMEM184A
ENSG00000151882	1.49506	1.07769e-19	8.54871e-19	CCL28
ENSG00000179331	-1.21406	1.08768e-27	1.07786e-26	RAB39A
ENSG00000176978	-0.779851	6.06068e-89	1.54951e-87	DPP7
ENSG00000237732	-1.97428	4.55415e-12	2.708e-11	AC010980.2
ENSG00000164591	-2.13132	4.56641e-18	3.45186e-17	MYOZ3
ENSG00000251247	-0.624175	5.30251e-08	2.54306e-07	ZNF345
ENSG00000164574	1.47492	1.65382e-280	1.54959e-278	GALNT10
ENSG00000164442	0.972668	4.15328e-104	1.23546e-102	CITED2
ENSG00000166866	-1.18522	0.00010042	0.000374161	MYO1A
ENSG00000164430	2.68882	2.1934e-49	3.34773e-48	MB21D1
ENSG00000166228	1.26057	1.39122e-147	5.95023e-146	PCBD1
ENSG00000164318	-2.41239	4.51914e-17	3.30286e-16	EGFLAM
ENSG00000164306	-0.700882	2.06831e-30	2.19312e-29	PRIMPOL
ENSG00000169432	-0.818634	0.000123554	0.000456109	SCN9A
ENSG00000101460	0.71818	8.06218e-15	5.43917e-14	MAP1LC3A
ENSG00000164414	1.34611	5.07021e-247	4.03587e-245	SLC35A1
ENSG00000164236	-1.38739	4.45752e-15	3.03346e-14	ANKRD33B
ENSG00000164181	0.596629	9.07083e-28	9.00718e-27	ELOVL7
ENSG00000196517	1.24278	8.0111e-54	1.32441e-52	SLC6A9
ENSG00000115652	1.53666	2.45128e-63	4.67769e-62	UXS1
ENSG00000164125	1.80096	1.08748e-08	5.44643e-08	FAM198B
ENSG00000164078	-1.28142	1.19528e-10	6.653e-10	MST1R
ENSG00000135116	1.68612	2.58963e-41	3.45556e-40	HRK
ENSG00000163931	0.926254	1.58573e-114	5.18825e-113	TKT
ENSG00000227646	2.3187	2.18894e-10	1.20357e-09	STEAP2-AS1
ENSG00000163900	0.674857	9.596e-49	1.45045e-47	TMEM41A
ENSG00000163898	3.63529	0	0	LIPH
ENSG00000163874	1.07446	2.68311e-87	6.73952e-86	ZC3H12A
ENSG00000139410	0.853433	4.67865e-23	4.10106e-22	SDSL
ENSG00000135540	0.72577	6.31991e-15	4.28476e-14	NHSL1
ENSG00000153157	-1.25834	1.85528e-05	7.36097e-05	SYCP2L
ENSG00000188112	1.32107	8.52091e-41	1.12006e-39	C6orf132
ENSG00000241361	-0.786991	2.28174e-21	1.89981e-20	SLC25A24P1
ENSG00000174804	-0.773396	3.90766e-80	8.97613e-79	FZD4
ENSG00000163697	-1.35555	1.48847e-283	1.42973e-281	APBB2
ENSG00000163694	0.937535	4.32707e-212	2.8288e-210	RBM47
ENSG00000235978	-1.38039	7.92755e-52	1.26089e-50	AC018816.3
ENSG00000126821	-1.16578	1.0363e-39	1.32769e-38	SGPP1
ENSG00000163683	0.723136	2.68593e-121	9.34827e-120	SMIM14
ENSG00000104140	2.31611	2.50262e-154	1.122e-152	RHOV
ENSG00000118194	1.56795	1.77732e-09	9.31513e-09	TNNT2
ENSG00000187231	-1.02219	4.20145e-103	1.24548e-101	SESTD1
ENSG00000167645	0.629551	5.91666e-26	5.57261e-25	YIF1B
ENSG00000163623	-5.41339	2.77113e-160	1.30179e-158	NKX6-1
ENSG00000126262	4.10082	0	0	FFAR2
ENSG00000108001	1.51912	1.72257e-09	9.03786e-09	EBF3
ENSG00000163596	-0.625342	7.3739e-18	5.53035e-17	ICA1L
ENSG00000163541	0.603044	1.94121e-50	3.01774e-49	SUCLG1
ENSG00000272913	-1.8829	1.0699e-33	1.22228e-32	RP11-440D17.3
ENSG00000163864	-1.69288	3.54969e-262	3.04397e-260	NMNAT3
ENSG00000163517	-0.664934	3.87814e-29	3.99274e-28	HDAC11
ENSG00000067057	3.49272	4.74763e-157	2.18258e-155	PFKP
ENSG00000172795	-0.645585	1.47858e-58	2.62488e-57	DCP2
ENSG00000163435	1.64028	6.20602e-175	3.2188e-173	ELF3
ENSG00000232810	1.55788	4.65257e-10	2.51435e-09	TNF
ENSG00000143013	-2.56044	0	0	LMO4
ENSG00000175920	-3.01746	1.1132e-124	4.01253e-123	DOK7
ENSG00000165186	-0.907625	3.69329e-05	0.0001431	PTCHD1
ENSG00000163347	-2.04984	2.55953e-07	1.1751e-06	CLDN1
ENSG00000130733	0.720924	2.07692e-32	2.30162e-31	YIPF2
ENSG00000163257	-0.586183	1.11835e-58	1.99361e-57	DCAF16
ENSG00000163235	-0.835346	4.14298e-23	3.6343e-22	TGFA
ENSG00000257702	1.85944	1.40823e-30	1.50061e-29	LBX2-AS1
ENSG00000163220	9.45837	0	0	S100A9
ENSG00000172260	1.12541	3.0938e-34	3.56285e-33	NEGR1
ENSG00000166922	1.90879	2.37857e-18	1.81196e-17	SCG5
ENSG00000163171	-1.97514	1.7982e-89	4.63529e-88	CDC42EP3
ENSG00000085552	-2.20239	3.57022e-202	2.22811e-200	IGSF9
ENSG00000203635	1.19044	8.14016e-12	4.78325e-11	AC144450.2
ENSG00000277117	0.645944	6.13546e-06	2.53765e-05	CH507-9B2.1
ENSG00000205086	-0.852081	0.00020539	0.000739632	C2orf91
ENSG00000186510	1.50995	1.89362e-12	1.14681e-11	CLCNKA
ENSG00000166006	-7.64388	2.23612e-248	1.78822e-246	KCNC2
ENSG00000158427	-2.02658	4.43015e-16	3.12812e-15	TMSB15B
ENSG00000115041	-0.667393	1.41105e-08	7.01589e-08	KCNIP3
ENSG00000166816	1.36281	1.55908e-19	1.23105e-18	LDHD
ENSG00000162894	-2.24678	8.64264e-11	4.84978e-10	FCMR
ENSG00000162892	-1.79631	3.55074e-06	1.49668e-05	IL24
ENSG00000012779	-1.6516	3.97902e-05	0.000153721	ALOX5
ENSG00000135824	2.24923	4.7593e-13	2.96697e-12	RGS8
ENSG00000102265	-6.95718	3.84412e-128	1.42291e-126	TIMP1
ENSG00000162782	-4.34027	2.92312e-40	3.80028e-39	TDRD5
ENSG00000151025	-7.30812	7.76815e-203	4.85679e-201	GPR158
ENSG00000162746	-0.860393	5.36669e-11	3.03977e-10	FCRLB
ENSG00000162745	-6.01028	1.83351e-125	6.64371e-124	OLFML2B
ENSG00000238290	-0.858204	0.000103638	0.000385693	RP11-431K24.1
ENSG00000178409	2.29614	0	0	BEND3
ENSG00000124429	-1.78035	1.0477e-48	1.58292e-47	POF1B
ENSG00000157693	1.04076	1.56143e-88	3.98315e-87	C9orf91
ENSG00000184160	-2.05921	1.28872e-121	4.48989e-120	ADRA2C
ENSG00000162552	1.16583	3.25506e-38	4.06434e-37	WNT4
ENSG00000177628	0.945626	1.85771e-84	4.51776e-83	GBA
ENSG00000170525	-0.951442	4.59653e-24	4.12261e-23	PFKFB3
ENSG00000162434	-1.1321	0	0	JAK1
ENSG00000162426	-1.06124	3.66675e-08	1.77564e-07	SLC45A1
ENSG00000251602	-0.937699	8.97439e-21	7.32674e-20	RP11-521B24.3
ENSG00000162298	0.769784	1.01658e-21	8.55533e-21	SYVN1
ENSG00000162104	-0.777342	7.6828e-42	1.03199e-40	ADCY9
ENSG00000167680	-3.72514	6.84096e-105	2.0545e-103	SEMA6B
ENSG00000136944	-0.688142	1.40183e-16	1.0091e-15	LMX1B
ENSG00000160963	-2.0405	2.01305e-15	1.38918e-14	COL26A1
ENSG00000161939	-1.12987	0.000187962	0.00067922	RNASEK-C17orf49
ENSG00000161912	-1.00213	1.53848e-05	6.14232e-05	ADCY10P1
ENSG00000161682	-1.09688	1.80641e-28	1.82536e-27	FAM171A2
ENSG00000161647	-0.606982	1.75859e-23	1.55537e-22	MPP3
ENSG00000177542	1.04859	4.47983e-95	1.23733e-93	SLC25A22
ENSG00000261888	-1.44307	8.52379e-08	4.0323e-07	AC144831.1
ENSG00000177173	-1.23004	2.16271e-13	1.37314e-12	NAP1L4P1
ENSG00000161328	-1.23359	6.96943e-41	9.19286e-40	LRRC56
ENSG00000205838	-0.851365	3.74646e-05	0.000145078	TTC23L
ENSG00000261538	2.45612	1.83534e-18	1.40342e-17	RP11-3M1.1
ENSG00000161016	0.746427	3.77182e-80	8.67569e-79	RPL8
ENSG00000121900	-0.675045	1.00897e-33	1.15343e-32	TMEM54
ENSG00000082397	3.30953	6.59968e-299	6.83564e-297	EPB41L3
ENSG00000136531	1.6454	2.05221e-06	8.83333e-06	SCN2A
ENSG00000160867	2.13475	0	0	FGFR4
ENSG00000160862	9.4786	0	0	AZGP1
ENSG00000162599	2.61504	2.46569e-189	1.41313e-187	NFIA
ENSG00000160746	1.31082	1.03704e-164	5.02262e-163	ANO10
ENSG00000149115	1.30204	1.83827e-242	1.43992e-240	TNKS1BP1
ENSG00000160716	-1.45503	5.28848e-122	1.85377e-120	CHRNB2
ENSG00000160678	1.38336	7.03142e-13	4.34639e-12	S100A1
ENSG00000160584	-1.04291	3.81254e-38	4.75179e-37	SIK3
ENSG00000158089	-1.52844	1.08085e-168	5.36325e-167	GALNT14
ENSG00000164403	-0.831265	8.58848e-13	5.28701e-12	SHROOM1
ENSG00000230695	-1.58358	7.27875e-05	0.000274476	AC012462.1
ENSG00000160439	0.598454	7.83427e-26	7.34853e-25	RDH13
ENSG00000157110	0.932834	1.94565e-12	1.1779e-11	RBPMS
ENSG00000160321	0.631514	8.74899e-17	6.34173e-16	ZNF208
ENSG00000166833	-1.26768	1.81379e-32	2.01521e-31	NAV2
ENSG00000160285	0.840121	1.86221e-100	5.37214e-99	LSS
ENSG00000167799	-1.1485	7.29557e-41	9.6083e-40	NUDT8
ENSG00000160213	0.853897	1.39194e-34	1.61432e-33	CSTB
ENSG00000183336	0.925584	1.51484e-07	7.04404e-07	BOLA2
ENSG00000214216	-2.29114	1.60435e-08	7.9517e-08	IQCJ
ENSG00000160180	4.50986	0	0	TFF3
ENSG00000160094	-0.852878	2.74923e-30	2.90617e-29	ZNF362
ENSG00000186951	-1.05392	2.00359e-76	4.43641e-75	PPARA
ENSG00000160072	0.617362	5.27462e-45	7.50739e-44	ATAD3B
ENSG00000117480	-0.80399	3.73014e-80	8.58557e-79	FAAH
ENSG00000159784	-2.63479	2.46654e-13	1.56114e-12	FAM131B
ENSG00000165389	0.694725	6.95786e-51	1.09151e-49	SPTSSA
ENSG00000159423	0.632915	3.47013e-48	5.19719e-47	ALDH4A1
ENSG00000159409	-3.22292	8.81117e-100	2.52702e-98	CELF3
ENSG00000159388	-0.789936	2.25546e-37	2.76896e-36	BTG2
ENSG00000132561	1.24928	2.3143e-157	1.06678e-155	MATN2
ENSG00000165533	-0.732738	6.28982e-59	1.1265e-57	TTC8
ENSG00000008323	0.76638	2.03424e-12	1.23067e-11	PLEKHG6
ENSG00000159239	-0.925884	3.62646e-14	2.37938e-13	C2orf81
ENSG00000205181	-2.15178	4.80258e-31	5.17537e-30	LINC00654
ENSG00000159200	4.16273	0	0	RCAN1
ENSG00000159167	-2.72249	2.96098e-146	1.25239e-144	STC1
ENSG00000262814	0.782587	4.93978e-18	3.72836e-17	MRPL12
ENSG00000158859	-0.780901	7.78849e-10	4.16326e-09	ADAMTS4
ENSG00000166128	1.32957	3.00279e-42	4.07647e-41	RAB8B
ENSG00000145014	-0.62429	3.7425e-15	2.55395e-14	TMEM44
ENSG00000158555	1.54152	1.7153e-15	1.18561e-14	GDPD5
ENSG00000052344	1.21657	4.2244e-139	1.699e-137	PRSS8
ENSG00000075223	2.02663	0	0	SEMA3C
ENSG00000161921	0.783844	1.70636e-08	8.44391e-08	CXCL16
ENSG00000158470	-0.628491	1.81995e-68	3.68785e-67	B4GALT5
ENSG00000158423	-0.714925	5.89535e-05	0.000224425	RIBC1
ENSG00000182492	-2.68568	6.75953e-17	4.91624e-16	BGN
ENSG00000158296	1.16649	6.09761e-09	3.099e-08	SLC13A3
ENSG00000186260	-1.02395	2.23932e-117	7.53458e-116	MKL2
ENSG00000223969	1.4569	1.16429e-06	5.11191e-06	AC002456.2
ENSG00000100206	-1.05081	2.21034e-12	1.33509e-11	DMC1
ENSG00000158220	-0.823587	3.84457e-06	1.61717e-05	ESYT3
ENSG00000171813	0.714163	4.00827e-31	4.33027e-30	PWWP2B
ENSG00000158050	-3.43684	4.89857e-184	2.69515e-182	DUSP2
ENSG00000168546	-1.1425	1.00633e-09	5.34185e-09	GFRA2
ENSG00000157927	-2.22492	8.51842e-62	1.58852e-60	RADIL
ENSG00000174307	-0.59536	8.09468e-14	5.22628e-13	PHLDA3
ENSG00000109472	3.52251	0	0	CPE
ENSG00000249430	-3.5383	7.32316e-19	5.67421e-18	CTD-2231H16.1
ENSG00000157617	-1.38491	1.49716e-05	5.98637e-05	C2CD2
ENSG00000172830	0.772255	4.50709e-83	1.07853e-81	SSH3
ENSG00000141101	0.705402	1.5308e-12	9.31015e-12	NOB1
ENSG00000116260	0.776617	7.33069e-73	1.57255e-71	QSOX1
ENSG00000158286	-0.892075	1.81436e-09	9.5035e-09	RNF207
ENSG00000157483	1.64517	0	0	MYO1E
ENSG00000158815	-0.638258	1.2448e-07	5.81825e-07	FGF17
ENSG00000175197	1.20247	2.71098e-55	4.61497e-54	DDIT3
ENSG00000157216	-0.597129	3.76836e-14	2.46965e-13	SSBP3
ENSG00000244701	1.12268	1.29464e-13	8.30263e-13	RP5-894A10.2
ENSG00000157181	0.602497	1.05747e-60	1.93834e-59	C1orf27
ENSG00000177182	0.977339	6.15107e-06	2.5438e-05	CLVS1
ENSG00000237424	-0.977664	0.000279042	0.000990443	FOXD2-AS1
ENSG00000272502	3.19177	3.91281e-17	2.86764e-16	RP11-713M15.2
ENSG00000125089	1.4285	7.19257e-222	4.86872e-220	SH3TC1
ENSG00000156958	0.586005	3.64808e-23	3.20425e-22	GALK2
ENSG00000156804	-1.3093	5.1827e-86	1.28306e-84	FBXO32
ENSG00000152127	-0.962798	4.18219e-152	1.83435e-150	MGAT5
ENSG00000156709	0.789343	4.70989e-45	6.71194e-44	AIFM1
ENSG00000156689	0.65475	6.73984e-17	4.90296e-16	GLYATL2
ENSG00000156675	0.587701	8.2406e-141	3.34162e-139	RAB11FIP1
ENSG00000105329	-1.32961	1.85164e-18	1.41557e-17	TGFB1
ENSG00000257767	2.17655	2.05646e-24	1.86339e-23	RP11-162P23.2
ENSG00000156535	-3.12471	2.17445e-157	1.00366e-155	CD109
ENSG00000261963	-2.16886	1.88929e-09	9.88542e-09	RP11-74E22.4
ENSG00000155961	-0.681423	2.75061e-27	2.6932e-26	RAB39B
ENSG00000277186	-1.62752	1.3021e-06	5.69009e-06	RP13-554M15.8
ENSG00000156453	-0.960903	4.74834e-96	1.31998e-94	PCDH1
ENSG00000177398	-0.80378	4.1522e-05	0.000160159	UMODL1
ENSG00000156299	-0.728868	1.44291e-92	3.84632e-91	TIAM1
ENSG00000179388	-3.8938	3.59767e-80	8.2862e-79	EGR3
ENSG00000128011	-1.95131	4.40003e-22	3.74052e-21	LRFN1
ENSG00000156239	-0.597984	5.88611e-31	6.32715e-30	N6AMT1
ENSG00000156194	1.08074	2.99245e-05	0.00011688	PPEF2
ENSG00000156218	1.84366	4.35175e-217	2.91136e-215	ADAMTSL3
ENSG00000156103	-5.44851	0	0	MMP16
ENSG00000156096	7.23508	0	0	UGT2B4
ENSG00000144893	-2.74994	6.39419e-100	1.83844e-98	MED12L
ENSG00000155980	-1.85063	2.00934e-39	2.55814e-38	KIF5A
ENSG00000171365	1.43609	7.15982e-51	1.12269e-49	CLCN5
ENSG00000174928	0.944525	1.92202e-33	2.18415e-32	C3orf33
ENSG00000135480	0.921177	6.19659e-132	2.34672e-130	KRT7
ENSG00000165424	-1.0554	4.51558e-14	2.94867e-13	ZCCHC24
ENSG00000155849	3.35587	1.71753e-93	4.63221e-92	ELMO1
ENSG00000151725	-0.872045	8.70707e-102	2.54817e-100	CENPU
ENSG00000140548	0.615862	2.30909e-27	2.26477e-26	ZNF710
ENSG00000168386	1.08199	3.21247e-07	1.46566e-06	FILIP1L
ENSG00000155158	1.75598	1.07158e-201	6.63933e-200	TTC39B
ENSG00000155093	-0.988831	1.33605e-110	4.23437e-109	PTPRN2
ENSG00000178462	6.64534	5.45568e-128	2.01509e-126	TUBAL3
ENSG00000143153	-0.998864	4.26743e-135	1.66188e-133	ATP1B1
ENSG00000266050	1.12123	0.000178047	0.000645221	RP11-822E23.6
ENSG00000176920	0.743008	3.6733e-07	1.66795e-06	FUT2
ENSG00000088340	-0.706095	2.46353e-30	2.60577e-29	FER1L4
ENSG00000157303	-0.821589	2.96692e-21	2.46136e-20	SUSD3
ENSG00000154537	1.32558	1.40933e-19	1.11434e-18	FAM27C
ENSG00000164104	-0.756761	4.88322e-212	3.18632e-210	HMGB2
ENSG00000154447	-0.8288	3.35857e-95	9.2988e-94	SH3RF1
ENSG00000154358	-0.692044	1.17583e-35	1.39425e-34	OBSCN
ENSG00000154310	2.32968	9.6916e-12	5.67743e-11	TNIK
ENSG00000070778	-1.36392	1.88127e-06	8.11276e-06	PTPN21
ENSG00000130768	-1.00596	5.60956e-51	8.82819e-50	SMPDL3B
ENSG00000154153	0.907766	6.80408e-59	1.2167e-57	FAM134B
ENSG00000171444	-2.64818	0	0	MCC
ENSG00000148841	-1.50701	3.58852e-06	1.51189e-05	ITPRIP
ENSG00000154040	-1.7623	4.81172e-46	6.99326e-45	CABYR
ENSG00000279427	3.00323	2.1545e-26	2.05511e-25	RP11-132F7.2
ENSG00000153956	2.54551	1.31499e-43	1.83368e-42	CACNA2D1
ENSG00000153922	0.61408	4.70601e-64	9.06079e-63	CHD1
ENSG00000153832	0.708872	1.73347e-09	9.09088e-09	FBXO36
ENSG00000074211	-1.15065	9.16447e-102	2.67975e-100	PPP2R2C
ENSG00000174227	0.690651	1.28394e-46	1.88036e-45	PIGG
ENSG00000153531	-0.60919	1.4299e-05	5.72542e-05	ADPRHL1
ENSG00000280441	-0.686428	8.98832e-06	3.6634e-05	CH507-528H12.1
ENSG00000153487	-0.616577	5.71087e-19	4.43195e-18	ING1
ENSG00000181449	-2.61496	2.64527e-20	2.13227e-19	SOX2
ENSG00000215105	0.617741	4.8068e-17	3.50937e-16	TTC3P1
ENSG00000104432	0.923388	1.39588e-14	9.31677e-14	IL7
ENSG00000064666	-0.753971	1.50303e-19	1.18788e-18	CNN2
ENSG00000278272	5.77756	2.86175e-204	1.80563e-202	HIST1H3C
ENSG00000241490	1.0725	0.000116385	0.000430801	RP11-553L6.2
ENSG00000153132	3.92101	9.28522e-229	6.55628e-227	CLGN
ENSG00000153130	0.877177	3.61886e-132	1.37505e-130	SCOC
ENSG00000185052	-5.24146	0	0	SLC24A3
ENSG00000153094	-1.63875	2.67152e-155	1.20558e-153	BCL2L11
ENSG00000153066	0.904742	2.21873e-47	3.28435e-46	TXNDC11
ENSG00000152954	-3.14639	4.64398e-21	3.82864e-20	NRSN1
ENSG00000152953	-1.44564	0	0	STK32B
ENSG00000116001	-0.841776	5.57927e-81	1.30071e-79	TIA1
ENSG00000132275	0.586463	9.50301e-38	1.17462e-36	RRP8
ENSG00000268100	2.05798	2.49779e-14	1.64701e-13	ZNF725P
ENSG00000152642	0.982827	1.05036e-130	3.95603e-129	GPD1L
ENSG00000152556	-0.62921	3.71294e-42	5.02269e-41	PFKM
ENSG00000152492	-3.83608	8.68822e-122	3.03928e-120	CCDC50
ENSG00000149328	3.04262	8.0522e-153	3.57279e-151	GLB1L2
ENSG00000152413	1.63133	2.93302e-138	1.17004e-136	HOMER1
ENSG00000152377	-4.70399	1.02646e-71	2.16812e-70	SPOCK1
ENSG00000165731	-1.33989	1.35109e-192	7.91482e-191	RET
ENSG00000152253	-0.856557	1.20669e-66	2.39437e-65	SPC25
ENSG00000141469	-0.838705	6.40297e-13	3.9679e-12	SLC14A1
ENSG00000197565	-2.46434	7.74781e-35	9.03744e-34	COL4A6
ENSG00000168301	-1.54373	1.43166e-133	5.50676e-132	KCTD6
ENSG00000159459	0.853933	1.18864e-164	5.74068e-163	UBR1
ENSG00000101343	-0.602772	6.70505e-72	1.4215e-70	CRNKL1
ENSG00000151790	6.31997	5.47661e-121	1.90035e-119	TDO2
ENSG00000151746	-1.18296	6.75632e-21	5.53957e-20	BICD1
ENSG00000151689	-2.32185	1.10058e-19	8.72421e-19	INPP1
ENSG00000136574	-3.18894	2.09804e-54	3.51072e-53	GATA4
ENSG00000165288	-0.64208	9.97418e-35	1.16108e-33	BRWD3
ENSG00000151655	4.87366	7.7896e-80	1.78574e-78	ITIH2
ENSG00000162511	-1.69056	1.11065e-05	4.48523e-05	LAPTM5
ENSG00000151640	-2.97838	3.10334e-142	1.27344e-140	DPYSL4
ENSG00000169239	0.631336	5.79126e-21	4.75625e-20	CA5B
ENSG00000151632	5.95368	3.12886e-117	1.04968e-115	AKR1C2
ENSG00000151575	-0.937226	1.16568e-39	1.49179e-38	TEX9
ENSG00000151552	-1.36302	6.19749e-48	9.23767e-47	QDPR
ENSG00000226007	0.857902	0.000238583	0.000853799	RP11-211N8.2
ENSG00000158985	0.978529	1.10813e-143	4.60764e-142	CDC42SE2
ENSG00000151466	-0.586627	1.73143e-46	2.53357e-45	SCLT1
ENSG00000127483	-0.836752	2.59061e-230	1.85205e-228	HP1BP3
ENSG00000127249	3.15054	6.21141e-77	1.38426e-75	ATP13A4
ENSG00000151388	-2.77577	1.68182e-45	2.41877e-44	ADAMTS12
ENSG00000151365	-0.978291	4.3495e-08	2.09859e-07	THRSP
ENSG00000169129	-3.22037	1.35421e-207	8.67172e-206	AFAP1L2
ENSG00000175785	-2.45844	4.2368e-11	2.4109e-10	PRIMA1
ENSG00000218357	3.84721	3.72912e-34	4.29018e-33	LL22NC03-75H12.2
ENSG00000151117	2.85843	0	0	TMEM86A
ENSG00000151033	2.023	3.16348e-08	1.53952e-07	LYZL2
ENSG00000151012	0.762334	8.6832e-21	7.0907e-20	SLC7A11
ENSG00000150961	1.75518	3.94169e-242	3.07353e-240	SEC24D
ENSG00000150938	-0.683727	1.70656e-59	3.08049e-58	CRIM1
ENSG00000276644	0.605615	2.97378e-09	1.54005e-08	DACH1
ENSG00000150712	0.902009	1.20641e-73	2.5993e-72	MTMR12
ENSG00000150687	1.10552	4.93352e-180	2.6384e-178	PRSS23
ENSG00000013588	-1.38974	6.79137e-78	1.52537e-76	GPRC5A
ENSG00000150526	3.11758	8.02106e-69	1.63401e-67	MIA2
ENSG00000150281	0.756661	0.000122264	0.000451832	CTF1
ENSG00000174469	-1.25439	0	0	CNTNAP2
ENSG00000169689	0.606106	2.72655e-39	3.46098e-38	STRA13
ENSG00000131238	1.51771	0	0	PPT1
ENSG00000150093	-0.712523	1.10722e-122	3.90102e-121	ITGB1
ENSG00000149782	0.82049	5.51531e-38	6.85417e-37	PLCB3
ENSG00000163873	-3.02246	0	0	GRIK3
ENSG00000167889	-4.42045	1.24436e-83	3.0028e-82	MGAT5B
ENSG00000196090	-1.79807	4.45193e-06	1.86126e-05	PTPRT
ENSG00000158008	-1.78072	4.69885e-82	1.11204e-80	EXTL1
ENSG00000197070	1.56633	7.40542e-279	6.90109e-277	ARRDC1
ENSG00000127824	2.91131	0	0	TUBA4A
ENSG00000281593	-0.687279	0.000243764	0.000871885	GS1-114I9.3
ENSG00000065485	1.45437	3.04038e-61	5.62095e-60	PDIA5
ENSG00000109654	-2.80324	1.43136e-40	1.8722e-39	TRIM2
ENSG00000112297	0.907792	5.45896e-170	2.7404e-168	AIM1
ENSG00000149295	-5.25216	1.86096e-235	1.38813e-233	DRD2
ENSG00000149294	-3.45212	4.09312e-243	3.21347e-241	NCAM1
ENSG00000149292	-0.682061	8.89577e-23	7.73058e-22	TTC12
ENSG00000274270	-1.00921	2.7658e-10	1.51084e-09	RP11-34F20.7
ENSG00000149260	-1.43251	1.95459e-99	5.59173e-98	CAPN5
ENSG00000149256	-3.20397	2.06951e-118	7.01124e-117	TENM4
ENSG00000149212	-2.76664	1.66677e-201	1.03085e-199	SESN3
ENSG00000153250	0.602592	2.36671e-41	3.16177e-40	RBMS1
ENSG00000149089	0.733612	1.17985e-58	2.10106e-57	APIP
ENSG00000175497	-0.804318	1.15972e-23	1.02994e-22	DPP10
ENSG00000124299	-0.628269	2.24499e-27	2.20316e-26	PEPD
ENSG00000171722	-2.76897	2.35267e-13	1.49127e-12	C1orf111
ENSG00000174032	-0.846492	2.6419e-22	2.26269e-21	SLC25A30
ENSG00000148702	5.38481	0	0	HABP2
ENSG00000148671	1.82592	0	0	ADIRF
ENSG00000146205	3.24466	1.43807e-120	4.97494e-119	ANO7
ENSG00000253182	2.23489	1.13636e-08	5.68215e-08	RP11-486M23.2
ENSG00000148498	-1.3039	1.57986e-241	1.22357e-239	PARD3
ENSG00000100105	-0.603668	4.10195e-54	6.82408e-53	PATZ1
ENSG00000148444	-1.12081	5.6994e-117	1.90833e-115	COMMD3
ENSG00000148429	0.887398	2.1765e-53	3.57248e-52	USP6NL
ENSG00000232400	3.33546	1.32237e-21	1.10827e-20	RAD17P1
ENSG00000148411	-0.868792	3.832e-49	5.81771e-48	NACC2
ENSG00000110400	-0.727652	5.01318e-24	4.49045e-23	PVRL1
ENSG00000148290	0.65553	3.66832e-27	3.57952e-26	SURF1
ENSG00000164211	2.5587	9.45028e-122	3.30251e-120	STARD4
ENSG00000179476	0.940593	3.77093e-14	2.47087e-13	C14orf28
ENSG00000169223	0.665127	1.55721e-69	3.20646e-68	LMAN2
ENSG00000148123	3.15908	6.88276e-52	1.09929e-50	PLPPR1
ENSG00000148057	1.01865	2.40839e-13	1.52546e-12	IDNK
ENSG00000148053	-1.64505	4.10739e-07	1.85868e-06	NTRK2
ENSG00000147889	-0.932888	3.66696e-33	4.13662e-32	CDKN2A
ENSG00000141622	-2.83104	2.88294e-109	8.99596e-108	RNF165
ENSG00000147813	0.70799	1.69371e-30	1.80092e-29	NAPRT
ENSG00000007174	-2.04375	4.21818e-16	2.98212e-15	DNAH9
ENSG00000104412	1.03996	1.38569e-110	4.38764e-109	EMC2
ENSG00000147654	0.857646	5.77961e-50	8.91227e-49	EBAG9
ENSG00000120137	-0.628079	5.1512e-153	2.29449e-151	PANK3
ENSG00000147535	1.24184	0	0	PLPP5
ENSG00000141449	-1.44546	2.58096e-54	4.31251e-53	GREB1L
ENSG00000143369	1.09133	1.52785e-06	6.64536e-06	ECM1
ENSG00000147457	-0.756129	6.05918e-50	9.32246e-49	CHMP7
ENSG00000152270	1.73603	2.19059e-302	2.29658e-300	PDE3B
ENSG00000147394	-1.86202	8.67242e-67	1.72281e-65	ZNF185
ENSG00000258929	1.59184	2.33537e-13	1.48112e-12	NA
ENSG00000173567	4.0737	5.41499e-197	3.26104e-195	ADGRF3
ENSG00000147274	-0.638734	4.44885e-201	2.74162e-199	RBMX
ENSG00000147251	1.04543	1.55819e-05	6.2203e-05	DOCK11
ENSG00000147234	-1.73822	2.40381e-14	1.58717e-13	FRMPD3
ENSG00000147180	-1.48705	5.30125e-73	1.13934e-71	ZNF711
ENSG00000065413	-0.589478	9.43309e-09	4.74026e-08	ANKRD44
ENSG00000147100	-3.68836	0	0	SLC16A2
ENSG00000265753	0.641595	6.01544e-06	2.4889e-05	RN7SL444P
ENSG00000140403	-1.11713	2.05005e-113	6.6442e-112	DNAJA4
ENSG00000146955	0.693166	0.000147545	0.000540037	RAB19
ENSG00000149577	0.851266	4.09236e-45	5.84159e-44	SIDT2
ENSG00000055163	-0.892658	5.74507e-35	6.72645e-34	CYFIP2
ENSG00000183049	-2.5549	3.16521e-125	1.1433e-123	CAMK1D
ENSG00000151743	-0.600252	1.54835e-15	1.07172e-14	AMN1
ENSG00000146038	1.66195	4.95737e-13	3.08709e-12	DCDC2
ENSG00000146757	-1.09436	4.13454e-107	1.26265e-105	ZNF92
ENSG00000214922	-1.16239	5.06589e-09	2.58881e-08	HLA-F-AS1
ENSG00000158445	-2.6997	4.38811e-111	1.39716e-109	KCNB1
ENSG00000146530	-2.46295	4.49779e-39	5.6967e-38	VWDE
ENSG00000168214	-0.694139	2.47115e-49	3.76497e-48	RBPJ
ENSG00000101665	-1.47493	1.2636e-108	3.91807e-107	SMAD7
ENSG00000197208	-1.64631	8.50014e-35	9.90828e-34	SLC22A4
ENSG00000128266	-2.75336	4.51044e-172	2.29779e-170	GNAZ
ENSG00000131398	-1.91336	1.99499e-13	1.26876e-12	KCNC3
ENSG00000164077	1.07995	1.33787e-27	1.32123e-26	MON1A
ENSG00000146242	-0.845414	1.45238e-105	4.39638e-104	TPBG
ENSG00000146122	-0.662246	0.000180625	0.000654012	DAAM2
ENSG00000148143	-1.92438	7.5198e-235	5.56093e-233	ZNF462
ENSG00000122912	1.06005	1.00721e-119	3.45312e-118	SLC25A16
ENSG00000146021	-2.39722	4.00893e-23	3.51761e-22	KLHL3
ENSG00000145990	-0.623233	2.95319e-30	3.11985e-29	GFOD1
ENSG00000154122	-3.01484	0	0	ANKH
ENSG00000145920	-4.0247	0	0	CPLX2
ENSG00000100344	0.806337	9.37504e-10	4.98391e-09	PNPLA3
ENSG00000103066	0.84066	1.60267e-21	1.34025e-20	PLA2G15
ENSG00000166997	0.907315	1.40004e-54	2.35304e-53	CNPY4
ENSG00000187391	-1.00089	7.1447e-38	8.85032e-37	MAGI2
ENSG00000133056	-0.811477	2.84687e-42	3.86786e-41	PIK3C2B
ENSG00000181031	0.64313	2.21269e-13	1.40409e-12	RPH3AL
ENSG00000183186	-1.18326	2.85922e-41	3.81233e-40	C2CD4C
ENSG00000249859	-2.54442	1.02772e-54	1.73067e-53	PVT1
ENSG00000204568	0.618968	6.98664e-38	8.66077e-37	MRPS18B
ENSG00000182118	1.6895	1.61599e-06	7.01363e-06	FAM89A
ENSG00000108846	1.68569	1.62277e-239	1.24281e-237	ABCC3
ENSG00000187510	4.40644	1.43777e-58	2.55507e-57	PLEKHG7
ENSG00000145687	-0.723864	2.37245e-119	8.10143e-118	SSBP2
ENSG00000145685	1.10645	6.42022e-263	5.53314e-261	LHFPL2
ENSG00000079308	-2.03565	5.64289e-143	2.32664e-141	TNS1
ENSG00000145569	-3.53145	7.63746e-86	1.8867e-84	FAM105A
ENSG00000133124	-1.22436	1.26406e-13	8.10953e-13	IRS4
ENSG00000119698	1.10613	2.73342e-07	1.25192e-06	PPP4R4
ENSG00000145476	0.920663	3.17449e-85	7.77502e-84	CYP4V2
ENSG00000145439	-0.762606	1.57051e-75	3.45744e-74	CBR4
ENSG00000264573	0.950865	8.74137e-06	3.56825e-05	RN7SL15P
ENSG00000163803	1.93662	5.08901e-08	2.44271e-07	PLB1
ENSG00000212195	0.769987	2.98593e-26	2.83601e-25	U3
ENSG00000145365	-1.07486	2.43845e-36	2.93391e-35	TIFA
ENSG00000145349	1.79531	1.0932e-254	9.01486e-253	CAMK2D
ENSG00000158055	-0.918179	5.86262e-07	2.62942e-06	GRHL3
ENSG00000161040	-0.882445	4.3327e-06	1.81362e-05	FBXL13
ENSG00000170153	-2.32189	2.40228e-65	4.68029e-64	RNF150
ENSG00000163376	1.47662	5.14409e-52	8.23126e-51	KBTBD8
ENSG00000067167	0.844711	3.47752e-161	1.64713e-159	TRAM1
ENSG00000188488	-1.42457	9.80376e-47	1.43885e-45	SERPINA5
ENSG00000111671	0.838352	7.25145e-17	5.27179e-16	SPSB2
ENSG00000149289	4.24255	5.12151e-48	7.65378e-47	ZC3H12C
ENSG00000169122	-0.954129	1.35596e-109	4.24659e-108	FAM110B
ENSG00000023902	-3.49651	9.47716e-202	5.88251e-200	PLEKHO1
ENSG00000137975	4.81116	0	0	CLCA2
ENSG00000144959	1.53482	2.87176e-165	1.39479e-163	NCEH1
ENSG00000144867	1.35112	1.4039e-236	1.05406e-234	SRPRB
ENSG00000151881	1.23707	3.09696e-55	5.26682e-54	C5orf28
ENSG00000144857	-1.02681	1.75084e-20	1.41629e-19	BOC
ENSG00000144837	2.2191	2.58116e-36	3.10127e-35	PLA1A
ENSG00000144824	5.52653	3.89015e-264	3.3866e-262	PHLDB2
ENSG00000144821	-1.19214	0.000181933	0.000658401	MYH15
ENSG00000144820	1.57771	7.87378e-05	0.000295714	ADGRG7
ENSG00000144791	0.681953	5.11363e-89	1.31226e-87	LIMD1
ENSG00000144785	0.664122	0.000270608	0.000961797	RP11-977G19.10
ENSG00000207611	-1.75112	2.02579e-06	8.72176e-06	MIR149
ENSG00000170412	2.25208	0	0	GPRC5C
ENSG00000115685	0.596945	6.94765e-53	1.13013e-51	PPP1R7
ENSG00000144668	1.15542	1.06891e-27	1.05957e-26	ITGA9
ENSG00000159763	4.47283	4.93699e-60	8.95875e-59	PIP
ENSG00000177383	-0.667572	9.39189e-69	1.91213e-67	MAGEF1
ENSG00000167173	0.612343	1.45246e-10	8.05318e-10	C15orf39
ENSG00000144476	-2.58108	4.41928e-135	1.71907e-133	ACKR3
ENSG00000144452	3.69356	3.29691e-134	1.27526e-132	ABCA12
ENSG00000144369	-1.23055	1.97345e-110	6.23149e-109	FAM171B
ENSG00000261342	-1.30868	4.16168e-29	4.2821e-28	AC006538.1
ENSG00000175264	2.10043	6.81192e-19	5.28284e-18	CHST1
ENSG00000166986	0.616979	4.59779e-96	1.27916e-94	MARS
ENSG00000170190	0.874962	0.00017976	0.000651085	SLC16A5
ENSG00000144278	1.6944	1.35784e-90	3.55884e-89	GALNT13
ENSG00000144191	3.34187	4.31865e-42	5.83748e-41	CNGA3
ENSG00000134588	-1.21333	4.40983e-05	0.000169735	USP26
ENSG00000145934	-1.13938	2.59365e-101	7.5583e-100	TENM2
ENSG00000143257	0.945287	6.84026e-09	3.46466e-08	NR1I3
ENSG00000143845	-0.99926	5.41745e-123	1.91656e-121	ETNK2
ENSG00000120729	-1.75039	2.48964e-06	1.06468e-05	MYOT
ENSG00000143816	-1.81289	9.84939e-30	1.03197e-28	WNT9A
ENSG00000143811	0.609283	2.91721e-54	4.87198e-53	PYCR2
ENSG00000108684	-2.81084	5.92912e-32	6.50972e-31	ASIC2
ENSG00000143774	1.09857	3.06085e-186	1.71983e-184	GUK1
ENSG00000143753	1.2194	2.00903e-154	9.01887e-153	DEGS1
ENSG00000261584	-0.928291	5.3702e-07	2.41297e-06	RP11-457M11.5
ENSG00000144649	-1.1768	1.32759e-152	5.86032e-151	FAM198A
ENSG00000143669	1.0729	4.81473e-81	1.12476e-79	LYST
ENSG00000146215	-1.56822	0.000110156	0.000408579	CRIP3
ENSG00000143641	-0.714787	1.3726e-49	2.10431e-48	GALNT2
ENSG00000131650	-1.34919	6.82839e-110	2.14829e-108	KREMEN2
ENSG00000176973	-0.785291	2.96213e-10	1.61578e-09	FAM89B
ENSG00000143570	1.37041	0	0	SLC39A1
ENSG00000143536	2.12513	1.9968e-10	1.09985e-09	CRNN
ENSG00000143512	4.3442	0	0	HHIPL2
ENSG00000143507	0.658465	5.77283e-29	5.92214e-28	DUSP10
ENSG00000269069	1.00713	3.24228e-08	1.57586e-07	CTC-471F3.5
ENSG00000143499	-1.1628	1.01614e-59	1.83712e-58	SMYD2
ENSG00000050165	-2.93628	2.19087e-14	1.44824e-13	DKK3
ENSG00000143473	-1.46405	3.75548e-44	5.28828e-43	KCNH1
ENSG00000143401	-1.31596	7.88644e-166	3.84668e-164	ANP32E
ENSG00000159674	4.8778	0	0	SPON2
ENSG00000164638	0.723745	4.05557e-20	3.25762e-19	SLC29A4
ENSG00000118096	-1.00224	3.85984e-43	5.33688e-42	IFT46
ENSG00000171357	-1.12973	6.40619e-05	0.000243065	LURAP1
ENSG00000159761	-1.20515	5.53538e-07	2.48557e-06	C16orf86
ENSG00000174871	-1.9717	4.9177e-29	5.05243e-28	CNIH2
ENSG00000146072	1.61883	5.68267e-225	3.89263e-223	TNFRSF21
ENSG00000172172	0.697526	3.32151e-63	6.3173e-62	MRPL13
ENSG00000142973	-1.45074	6.0075e-22	5.08441e-21	CYP4B1
ENSG00000142798	-0.628111	1.52675e-19	1.20608e-18	HSPG2
ENSG00000181690	1.8086	6.46128e-12	3.81105e-11	PLAG1
ENSG00000154864	-1.48999	0	0	PIEZO2
ENSG00000142621	1.02396	5.73816e-13	3.56363e-12	FHAD1
ENSG00000104852	-0.630046	4.32904e-58	7.63398e-57	SNRNP70
ENSG00000188001	-2.6993	3.71787e-43	5.14265e-42	TPRG1
ENSG00000142449	-3.20288	9.09819e-31	9.73124e-30	FBN3
ENSG00000159199	0.865721	1.42579e-69	2.93937e-68	ATP5G1
ENSG00000214215	4.03716	1.06578e-37	1.31594e-36	C12orf74
ENSG00000103978	0.925783	1.58336e-175	8.2246e-174	TMEM87A
ENSG00000163218	3.63816	1.09912e-22	9.52988e-22	PGLYRP4
ENSG00000142224	1.59493	6.44688e-05	0.000244555	IL19
ENSG00000142192	0.606113	7.41469e-87	1.85028e-85	APP
ENSG00000197457	-1.92591	0	0	STMN3
ENSG00000142185	0.803609	3.83306e-29	3.9487e-28	TRPM2
ENSG00000142089	-1.6204	2.78825e-60	5.07568e-59	IFITM3
ENSG00000198715	0.800762	2.01058e-32	2.22953e-31	GLMP
ENSG00000170266	1.36826	1.03816e-160	4.89031e-159	GLB1
ENSG00000151092	0.685754	9.07005e-41	1.19179e-39	NGLY1
ENSG00000141873	-0.637055	2.05736e-24	1.86371e-23	SLC39A3
ENSG00000141753	0.968462	1.29284e-120	4.47701e-119	IGFBP4
ENSG00000141744	1.06612	1.41187e-24	1.28439e-23	PNMT
ENSG00000165775	-1.24278	4.16783e-149	1.79823e-147	FUNDC2
ENSG00000214274	1.08925	2.57102e-60	4.68272e-59	ANG
ENSG00000141582	0.753867	3.92647e-40	5.07974e-39	CBX4
ENSG00000141569	0.825776	2.00653e-54	3.3625e-53	TRIM65
ENSG00000138413	0.611143	1.15786e-65	2.26867e-64	IDH1
ENSG00000213347	-0.912035	9.56077e-68	1.92261e-66	MXD3
ENSG00000125170	-0.934736	2.48834e-29	2.57963e-28	DOK4
ENSG00000149177	0.703042	1.74053e-52	2.81391e-51	PTPRJ
ENSG00000141542	1.00962	6.05571e-75	1.32382e-73	RAB40B
ENSG00000214530	1.15573	1.53306e-173	7.86824e-172	STARD10
ENSG00000141447	-0.776082	3.35027e-80	7.72674e-79	OSBPL1A
ENSG00000166165	-1.97369	2.36628e-172	1.20726e-170	CKB
ENSG00000141404	2.59982	4.62593e-164	2.22478e-162	GNAL
ENSG00000141401	1.34611	7.46246e-92	1.9709e-90	IMPA2
ENSG00000140374	0.905931	1.61892e-85	3.98496e-84	ETFA
ENSG00000169562	4.68494	1.46789e-70	3.05361e-69	GJB1
ENSG00000267056	-2.30978	7.14674e-10	3.82677e-09	AC005336.4
ENSG00000126391	-0.720809	6.16584e-26	5.80412e-25	FRMD8
ENSG00000141179	0.588136	8.72147e-24	7.76956e-23	PCTP
ENSG00000239390	0.876597	1.45313e-05	5.81642e-05	RN7SL87P
ENSG00000198910	-3.7654	5.88037e-123	2.07606e-121	L1CAM
ENSG00000089356	2.17105	0	0	FXYD3
ENSG00000140990	0.590487	4.42641e-52	7.0994e-51	NDUFB10
ENSG00000230157	-1.59951	5.77232e-05	0.000219961	ATP5G1P1
ENSG00000140961	1.32247	4.50658e-18	3.40813e-17	OSGIN1
ENSG00000156504	-1.14204	1.1687e-53	1.92656e-52	FAM122B
ENSG00000164694	-3.45573	6.55273e-18	4.92522e-17	FNDC1
ENSG00000172915	-1.71468	1.76983e-260	1.49531e-258	NBEA
ENSG00000140853	-0.879373	5.97342e-06	2.47211e-05	NLRC5
ENSG00000140682	0.613547	4.98964e-05	0.000191238	TGFB1I1
ENSG00000140650	1.58577	1.5437e-177	8.1291e-176	PMM2
ENSG00000140526	-0.8265	3.87289e-224	2.6424e-222	ABHD2
ENSG00000140488	-3.79892	5.02568e-28	5.02378e-27	CELF6
ENSG00000140474	-0.777782	1.7622e-97	4.96695e-96	ULK3
ENSG00000140463	-0.665198	8.72794e-17	6.3278e-16	BBS4
ENSG00000140451	-0.932539	4.4941e-29	4.61861e-28	PIF1
ENSG00000140443	-1.31684	8.8017e-116	2.90465e-114	IGF1R
ENSG00000140332	-0.600499	1.81375e-38	2.27211e-37	TLE3
ENSG00000140323	-1.70336	1.5167e-61	2.81918e-60	DISP2
ENSG00000140297	3.03686	1.38572e-135	5.40256e-134	GCNT3
ENSG00000264448	0.760603	2.08376e-05	8.23516e-05	RP3-388N13.5
ENSG00000156463	-4.23293	2.00569e-74	4.35965e-73	SH3RF2
ENSG00000140264	1.34811	0	0	SERF2
ENSG00000140092	1.5302	1.40296e-11	8.15478e-11	FBLN5
ENSG00000077585	-1.07995	6.6432e-65	1.29062e-63	GPR137B
ENSG00000179958	0.809725	9.14444e-54	1.51033e-52	DCTPP1
ENSG00000188886	-2.03101	3.60396e-18	2.73334e-17	ASTL
ENSG00000176029	3.20387	2.05641e-59	3.70229e-58	C11orf16
ENSG00000103316	4.58479	2.33086e-295	2.37134e-293	CRYM
ENSG00000128268	-1.31367	4.1505e-125	1.49762e-123	MGAT3
ENSG00000139985	1.15329	1.46148e-12	8.90113e-12	ADAM21
ENSG00000181652	-1.75558	2.43584e-28	2.45418e-27	ATG9B
ENSG00000198513	0.924893	1.83541e-09	9.61083e-09	ATL1
ENSG00000139974	0.600875	4.16925e-12	2.48385e-11	SLC38A6
ENSG00000035862	-1.02099	1.92753e-59	3.47208e-58	TIMP2
ENSG00000139970	-4.81515	1.67749e-117	5.66083e-116	RTN1
ENSG00000139926	0.994858	7.7054e-119	2.62083e-117	FRMD6
ENSG00000144711	-0.667383	2.13993e-24	1.938e-23	IQSEC1
ENSG00000153046	0.676825	2.08613e-43	2.89725e-42	CDYL
ENSG00000235204	1.82002	4.10215e-06	1.72109e-05	RP11-121A14.2
ENSG00000141522	0.622434	4.82613e-12	2.86576e-11	ARHGDIA
ENSG00000078900	-2.03444	2.06247e-108	6.3779e-107	TP73
ENSG00000104760	3.08792	7.77824e-20	6.19574e-19	FGL1
ENSG00000136098	-2.49106	1.89521e-49	2.89647e-48	NEK3
ENSG00000169715	-2.08084	3.14455e-08	1.53074e-07	MT1E
ENSG00000139679	-1.00707	4.5927e-26	4.34468e-25	LPAR6
ENSG00000231721	2.22369	6.64429e-51	1.04327e-49	LINC-PINT
ENSG00000139547	1.41618	2.72207e-57	4.74906e-56	RDH16
ENSG00000139445	1.52445	5.1325e-06	2.13437e-05	FOXN4
ENSG00000179698	-0.772652	9.2544e-10	4.92237e-09	WDR97
ENSG00000196705	-1.40064	0	0	ZNF431
ENSG00000213612	1.40907	0.000228457	0.000819353	FAM220CP
ENSG00000139352	1.59597	4.25055e-05	0.000163879	ASCL1
ENSG00000100027	-1.31792	4.36707e-77	9.75132e-76	YPEL1
ENSG00000139318	0.692657	4.1115e-90	1.07189e-88	DUSP6
ENSG00000144355	0.615519	2.68095e-09	1.39133e-08	DLX1
ENSG00000139289	0.915172	3.11328e-29	3.21683e-28	PHLDA1
ENSG00000234851	0.659365	2.88792e-32	3.19315e-31	RPL23AP42
ENSG00000161267	0.889725	1.25775e-66	2.49281e-65	BDH1
ENSG00000189120	1.28459	3.06853e-15	2.09902e-14	SP6
ENSG00000154473	-0.890388	2.63963e-187	1.49291e-185	BUB3
ENSG00000177875	-1.90831	1.13487e-17	8.46706e-17	CCDC184
ENSG00000139112	1.47588	6.41166e-47	9.43421e-46	GABARAPL1
ENSG00000139083	-0.644483	1.02901e-20	8.38694e-20	ETV6
ENSG00000164171	-0.917596	2.35662e-05	9.27992e-05	ITGA2
ENSG00000177169	-1.1544	2.74742e-83	6.60207e-82	ULK1
ENSG00000157851	-3.66776	0	0	DPYSL5
ENSG00000138829	-6.46509	1.38973e-152	6.12674e-151	FBN2
ENSG00000138821	-3.01988	2.4089e-52	3.88532e-51	SLC39A8
ENSG00000130956	1.2254	9.38942e-45	1.33199e-43	HABP4
ENSG00000157036	-1.21135	5.77419e-09	2.93897e-08	EXOG
ENSG00000163331	1.66812	2.40307e-06	1.02894e-05	DAPL1
ENSG00000138764	-1.02146	1.06685e-100	3.08804e-99	CCNG2
ENSG00000242498	1.22651	8.63099e-17	6.25884e-16	ARPIN
ENSG00000138756	0.649632	2.69322e-57	4.7011e-56	BMP2K
ENSG00000148488	-1.42248	3.35693e-233	2.4613e-231	ST8SIA6
ENSG00000158292	-1.17859	7.36127e-38	9.11531e-37	GPR153
ENSG00000198948	1.20085	2.20549e-80	5.09679e-79	MFAP3L
ENSG00000138696	4.65618	1.07912e-92	2.88328e-91	BMPR1B
ENSG00000138678	-0.670657	2.38046e-09	1.2398e-08	GPAT3
ENSG00000167216	-0.600998	2.45331e-19	1.92343e-18	KATNAL2
ENSG00000118508	-0.679998	8.3816e-23	7.28743e-22	RAB32
ENSG00000050628	-1.59953	1.41071e-16	1.01528e-15	PTGER3
ENSG00000157211	1.71983	8.33087e-06	3.40918e-05	CDCP2
ENSG00000138613	-0.923774	3.48557e-29	3.59719e-28	APH1B
ENSG00000155368	1.58201	0	0	DBI
ENSG00000254902	1.78177	8.11742e-06	3.32461e-05	ANO1-AS1
ENSG00000168394	1.11305	5.9809e-27	5.79175e-26	TAP1
ENSG00000271826	1.51689	1.56607e-06	6.8047e-06	PLS3-AS1
ENSG00000278934	-1.68808	1.6111e-06	6.99505e-06	CTD-2006M22.2
ENSG00000138363	0.588701	1.50585e-05	6.01902e-05	ATIC
ENSG00000138172	-1.0026	6.10313e-53	9.94165e-52	CALHM2
ENSG00000082196	-1.31428	1.35705e-20	1.10293e-19	C1QTNF3
ENSG00000104324	-2.0839	1.14882e-60	2.10465e-59	CPQ
ENSG00000138074	0.782624	1.52383e-86	3.79159e-85	SLC5A6
ENSG00000181458	1.38234	3.82698e-166	1.87462e-164	TMEM45A
ENSG00000165868	-1.12327	1.22627e-53	2.01952e-52	HSPA12A
ENSG00000099956	-0.71689	2.74965e-37	3.36604e-36	SMARCB1
ENSG00000138028	0.629878	4.57694e-07	2.06464e-06	CGREF1
ENSG00000137968	2.22804	4.54787e-79	1.03431e-77	SLC44A5
ENSG00000189433	1.90391	5.28313e-07	2.37509e-06	GJB4
ENSG00000161714	-0.731313	3.55171e-18	2.69549e-17	PLCD3
ENSG00000260902	-1.55036	4.03611e-05	0.000155821	RP11-95M5.1
ENSG00000158769	0.68902	6.60869e-117	2.20848e-115	F11R
ENSG00000137878	-2.11163	1.02551e-11	6.00039e-11	GCOM1
ENSG00000137877	0.756137	5.39612e-09	2.75062e-08	SPTBN5
ENSG00000158856	-1.24811	2.37078e-08	1.16181e-07	DMTN
ENSG00000137842	2.65763	0	0	TMEM62
ENSG00000137834	2.04377	2.91512e-227	2.03744e-225	SMAD6
ENSG00000140299	-1.03637	4.65675e-129	1.73303e-127	BNIP2
ENSG00000137825	-0.772656	0.000102653	0.000382151	ITPKA
ENSG00000137821	-1.53245	1.85953e-99	5.32421e-98	LRRC49
ENSG00000137817	-1.04615	1.41333e-100	4.08405e-99	PARP6
ENSG00000181026	0.759176	3.19779e-52	5.14083e-51	AEN
ENSG00000137710	1.32687	2.23243e-173	1.14406e-171	RDX
ENSG00000224973	-1.34998	2.02303e-05	8.00253e-05	LARGE-AS1
ENSG00000123685	1.05473	7.65117e-06	3.13925e-05	BATF3
ENSG00000119640	-0.894814	8.13028e-37	9.85463e-36	ACYP1
ENSG00000197308	-0.721149	4.00501e-32	4.41129e-31	GATA3-AS1
ENSG00000165752	-1.7673	1.5432e-120	5.33328e-119	STK32C
ENSG00000226200	0.682674	5.61031e-12	3.32109e-11	SGMS1-AS1
ENSG00000181097	0.793106	1.24551e-05	5.00869e-05	RP11-429J17.2
ENSG00000109917	0.746891	5.12417e-52	8.2032e-51	ZPR1
ENSG00000166575	0.984954	5.19499e-89	1.33214e-87	TMEM135
ENSG00000109670	-1.34367	0	0	FBXW7
ENSG00000169429	2.09352	1.69964e-09	8.91892e-09	CXCL8
ENSG00000102996	0.610479	8.74932e-20	6.95958e-19	MMP15
ENSG00000130695	-0.679471	1.64612e-78	3.71913e-77	CEP85
ENSG00000166819	1.11741	3.67195e-06	1.54607e-05	PLIN1
ENSG00000117054	0.947824	3.7305e-127	1.3676e-125	ACADM
ENSG00000164291	0.857627	4.28521e-42	5.79456e-41	ARSK
ENSG00000115084	1.05832	1.50503e-193	8.90767e-192	SLC35F5
ENSG00000067113	1.21728	7.4158e-51	1.16176e-49	PLPP1
ENSG00000171943	-0.688652	8.72032e-25	7.97727e-24	SRGAP2C
ENSG00000124783	0.747254	2.58219e-185	1.43447e-183	SSR1
ENSG00000109066	0.845805	6.12056e-31	6.57712e-30	TMEM104
ENSG00000131771	-1.61916	1.26451e-89	3.26693e-88	PPP1R1B
ENSG00000116977	-0.714995	2.97584e-102	8.76866e-101	LGALS8
ENSG00000183340	0.637196	0.000235306	0.000842863	JRKL
ENSG00000133104	1.17338	3.35706e-56	5.78353e-55	SPG20
ENSG00000106537	1.3988	0	0	TSPAN13
ENSG00000112294	-2.5579	6.40927e-154	2.866e-152	ALDH5A1
ENSG00000108551	2.78234	2.50878e-60	4.57419e-59	RASD1
ENSG00000136689	-2.92719	1.04167e-26	1.00139e-25	IL1RN
ENSG00000130635	-0.808192	9.32536e-13	5.73241e-12	COL5A1
ENSG00000145431	5.96729	1.5172e-97	4.28692e-96	PDGFC
ENSG00000134440	0.631839	1.41103e-93	3.80857e-92	NARS
ENSG00000004399	1.02048	8.88307e-112	2.84151e-110	PLXND1
ENSG00000145194	0.665178	5.11414e-13	3.18183e-12	ECE2
ENSG00000279289	1.86173	1.6467e-17	1.22195e-16	RP3-331H24.6
ENSG00000112706	1.09063	0.000130475	0.000480421	IMPG1
ENSG00000251580	-0.653986	0.000159491	0.000581716	RP11-539L10.3
ENSG00000117791	1.78622	6.56763e-66	1.29126e-64	2017-03-02
ENSG00000160111	1.23788	5.23318e-66	1.03125e-64	CPAMD8
ENSG00000117479	1.28021	5.9154e-241	4.57108e-239	SLC19A2
ENSG00000103811	-1.53415	9.2839e-27	8.94746e-26	CTSH
ENSG00000161082	-1.20133	1.07283e-31	1.17041e-30	CELF5
ENSG00000121691	0.658908	2.05726e-69	4.22599e-68	CAT
ENSG00000146555	1.62356	2.26238e-19	1.77537e-18	SDK1
ENSG00000107742	-1.19484	4.3991e-06	1.84029e-05	SPOCK2
ENSG00000106799	1.34828	0	0	TGFBR1
ENSG00000169855	1.26955	3.89406e-94	1.06697e-92	ROBO1
ENSG00000185532	-4.75656	8.23731e-201	5.0672e-199	PRKG1
ENSG00000169247	1.83067	8.8204e-40	1.13217e-38	SH3TC2
ENSG00000107679	2.97393	1.02704e-229	7.29689e-228	PLEKHA1
ENSG00000198818	1.84822	2.28194e-176	1.19073e-174	SFT2D1
ENSG00000155099	-0.81971	2.80045e-25	2.59356e-24	TMEM55A
ENSG00000136161	-0.627808	1.63686e-07	7.5981e-07	RCBTB2
ENSG00000181817	0.946174	1.03844e-24	9.47182e-24	LSM10
ENSG00000107485	-0.635841	1.23386e-10	6.86218e-10	GATA3
ENSG00000125844	1.90065	0	0	RRBP1
ENSG00000169991	-1.099	1.71261e-58	3.03635e-57	IFFO2
ENSG00000060140	0.761459	1.418e-16	1.0201e-15	STYK1
ENSG00000240606	0.998239	5.68065e-10	3.05841e-09	RN7SL564P
ENSG00000111912	0.706646	6.87485e-43	9.45279e-42	NCOA7
ENSG00000177426	-0.959195	9.25207e-64	1.77639e-62	TGIF1
ENSG00000148175	1.17696	2.78254e-237	2.10293e-235	STOM
ENSG00000118137	-1.64467	6.11895e-06	2.53112e-05	APOA1
ENSG00000135406	-2.52878	1.48955e-62	2.80665e-61	PRPH
ENSG00000176909	-0.788753	2.8682e-05	0.000112218	MAMSTR
ENSG00000084710	-1.54927	2.89052e-114	9.44832e-113	EFR3B
ENSG00000107105	-1.14935	4.27511e-50	6.61008e-49	ELAVL2
ENSG00000149218	0.884734	1.10915e-63	2.12718e-62	ENDOD1
ENSG00000128596	-2.46284	1.51657e-44	2.14787e-43	CCDC136
ENSG00000103495	-0.812969	4.60587e-86	1.14108e-84	MAZ
ENSG00000106829	2.78349	2.05873e-90	5.37944e-89	TLE4
ENSG00000224557	1.72658	1.82563e-08	9.01594e-08	HLA-DPB2
ENSG00000187240	-0.790738	2.5184e-58	4.45704e-57	DYNC2H1
ENSG00000230699	-3.98013	7.02181e-52	1.12098e-50	RP11-54O7.1
ENSG00000106804	2.73799	0	0	C5
ENSG00000172159	-2.71668	1.00608e-167	4.96356e-166	FRMD3
ENSG00000107854	-0.596092	1.19324e-33	1.36138e-32	TNKS2
ENSG00000007062	5.27393	1.58391e-123	5.64412e-122	PROM1
ENSG00000100441	0.601552	7.79553e-102	2.28529e-100	KHNYN
ENSG00000267519	0.983181	1.01794e-10	5.68614e-10	CTD-3252C9.4
ENSG00000164056	6.10039	0	0	SPRY1
ENSG00000181019	3.11777	0	0	NQO1
ENSG00000132669	1.13686	5.9928e-42	8.06554e-41	RIN2
ENSG00000267565	-0.785671	6.92626e-06	2.85169e-05	CTC-559E9.8
ENSG00000072422	-1.64252	5.50449e-112	1.76735e-110	RHOBTB1
ENSG00000106415	-1.63126	2.70125e-189	1.54556e-187	GLCCI1
ENSG00000106266	0.674359	4.01559e-22	3.41877e-21	SNX8
ENSG00000197385	-0.967952	9.02416e-09	4.54073e-08	ZNF860
ENSG00000183230	1.54536	7.26916e-07	3.23956e-06	CTNNA3
ENSG00000174705	-0.916953	2.43091e-39	3.09027e-38	SH3PXD2B
ENSG00000106144	-0.827036	3.37271e-63	6.41113e-62	CASP2
ENSG00000170703	1.74265	4.95518e-94	1.35664e-92	TTLL6
ENSG00000112902	-1.76105	4.93964e-57	8.59178e-56	SEMA5A
ENSG00000114739	-0.619775	7.35885e-35	8.58957e-34	ACVR2B
ENSG00000150672	-1.19865	1.36836e-29	1.42847e-28	DLG2
ENSG00000106066	-1.69705	5.29299e-07	2.3789e-06	CPVL
ENSG00000124140	-1.0527	2.88843e-27	2.82654e-26	SLC12A5
ENSG00000103642	1.01243	3.13047e-40	4.0637e-39	LACTB
ENSG00000121753	-0.91303	3.82652e-27	3.73096e-26	ADGRB2
ENSG00000135052	1.81251	0	0	GOLM1
ENSG00000146476	-0.81733	2.12861e-87	5.35845e-86	ARMT1
ENSG00000105835	1.82091	0	0	NAMPT
ENSG00000159884	0.604427	1.2485e-10	6.94131e-10	CCDC107
ENSG00000105808	-1.33636	3.1984e-151	1.3975e-149	RASA4
ENSG00000105755	0.785143	1.42598e-37	1.75565e-36	ETHE1
ENSG00000135519	-1.40379	3.91437e-40	5.06599e-39	KCNH3
ENSG00000073008	0.924773	1.86688e-83	4.48927e-82	PVR
ENSG00000259479	1.40269	1.58064e-59	2.8562e-58	SORD2P
ENSG00000066629	-2.34818	1.5891e-178	8.39392e-177	EML1
ENSG00000064726	-0.64396	2.99015e-54	4.99137e-53	BTBD1
ENSG00000183444	1.30023	2.5882e-10	1.41698e-09	OR7E38P
ENSG00000244307	1.19403	3.55882e-06	1.4999e-05	RN7SL395P
ENSG00000105662	-0.725054	1.6763e-18	1.28466e-17	CRTC1
ENSG00000105613	-2.40142	8.07716e-97	2.26365e-95	MAST1
ENSG00000135362	-1.94556	3.78286e-14	2.47821e-13	PRR5L
ENSG00000136147	0.791717	1.63661e-14	1.08982e-13	PHF11
ENSG00000198075	0.750922	6.08957e-10	3.2719e-09	SULT1C4
ENSG00000146700	-2.38414	2.95945e-65	5.7593e-64	SSC4D
ENSG00000108106	-0.59599	1.31771e-26	1.26394e-25	UBE2S
ENSG00000011478	0.852617	1.41394e-29	1.47471e-28	QPCTL
ENSG00000105523	4.56234	3.59677e-263	3.11542e-261	FAM83E
ENSG00000113231	-0.715395	1.9429e-08	9.57446e-08	PDE8B
ENSG00000168269	3.67761	1.08242e-22	9.38742e-22	FOXI1
ENSG00000107371	-0.947896	4.95209e-82	1.17117e-80	EXOSC3
ENSG00000168993	-0.673588	1.94369e-14	1.28856e-13	CPLX1
ENSG00000105419	-2.01362	5.40546e-185	2.98359e-183	MEIS3
ENSG00000116176	-1.10893	8.13516e-09	4.10362e-08	TPSG1
ENSG00000143147	1.89089	3.61272e-74	7.83788e-73	GPR161
ENSG00000173548	-1.04844	4.75082e-24	4.25877e-23	SNX33
ENSG00000173209	-0.600127	6.29528e-35	7.36062e-34	AHSA2
ENSG00000173193	-1.01917	4.80642e-109	1.49573e-107	PARP14
ENSG00000239467	1.01034	5.03685e-07	2.26645e-06	AC007405.6
ENSG00000187037	5.78078	1.62388e-92	4.32202e-91	GPR141
ENSG00000267100	-0.594466	2.75442e-16	1.95938e-15	ILF3-AS1
ENSG00000181544	-0.606352	8.75464e-23	7.60986e-22	FANCB
ENSG00000088298	0.972883	1.40071e-44	1.9846e-43	EDEM2
ENSG00000180730	-6.615	0	0	SHISA2
ENSG00000069712	-1.0054	2.36123e-32	2.61416e-31	KIAA1107
ENSG00000167460	-0.821215	7.61824e-63	1.44256e-61	TPM4
ENSG00000213231	1.77633	5.46969e-10	2.9476e-09	TCL1B
ENSG00000234231	-0.975817	3.07391e-07	1.40412e-06	AC093616.4
ENSG00000105186	0.830432	3.50382e-106	1.06625e-104	ANKRD27
ENSG00000117114	1.31477	2.34568e-294	2.37238e-292	ADGRL2
ENSG00000173852	-1.83918	1.07474e-127	3.95262e-126	DPY19L1
ENSG00000146426	-0.709104	2.79331e-11	1.60437e-10	TIAM2
ENSG00000160211	2.31986	0	0	G6PD
ENSG00000173221	4.14782	0	0	GLRX
ENSG00000119782	-3.11506	1.22347e-64	2.3689e-63	FKBP1B
ENSG00000115009	3.34327	1.56811e-24	1.42614e-23	CCL20
ENSG00000262904	-0.885391	0.000121106	0.000447744	TMPOP2
ENSG00000281851	-1.35182	8.84597e-05	0.000330817	Z98744.3
ENSG00000276956	1.18	1.13486e-07	5.32759e-07	RN7SL769P
ENSG00000126259	-1.3835	1.04962e-24	9.5713e-24	KIRREL2
ENSG00000171502	0.940635	5.84074e-14	3.79814e-13	COL24A1
ENSG00000104823	1.48739	1.25964e-175	6.55297e-174	ECH1
ENSG00000008056	-1.84813	2.45325e-17	1.80991e-16	SYN1
ENSG00000144406	-1.60643	6.1581e-77	1.37327e-75	UNC80
ENSG00000131044	-0.880303	2.66017e-05	0.000104317	TTLL9
ENSG00000100368	2.5169	1.12197e-11	6.55031e-11	CSF2RB
ENSG00000090013	1.21302	9.34099e-109	2.90161e-107	BLVRB
ENSG00000008282	1.29113	3.94732e-185	2.18577e-183	SYPL1
ENSG00000131732	0.680675	5.50209e-28	5.49682e-27	ZCCHC9
ENSG00000168348	1.97495	9.14562e-10	4.86752e-09	INSM2
ENSG00000170185	1.46758	0	0	USP38
ENSG00000133454	1.8365	1.71952e-11	9.96781e-11	MYO18B
ENSG00000251493	1.00564	2.04863e-10	1.12768e-09	FOXD1
ENSG00000104524	0.743766	2.95789e-52	4.76184e-51	PYCRL
ENSG00000104518	-3.27007	0	0	GSDMD
ENSG00000070731	0.939627	2.33822e-227	1.64091e-225	ST6GALNAC2
ENSG00000169385	1.45698	0.00022772	0.000816793	RNASE2
ENSG00000125347	-0.887288	8.94765e-20	7.11241e-19	IRF1
ENSG00000244239	1.17289	2.52647e-13	1.59819e-12	AC007009.1
ENSG00000196834	0.788974	8.84076e-20	7.02907e-19	POTEI
ENSG00000226054	2.57557	2.3965e-17	1.76994e-16	MEMO1P1
ENSG00000105559	-4.71899	5.33807e-191	3.08505e-189	PLEKHA4
ENSG00000179532	0.834697	4.73945e-25	4.36113e-24	DNHD1
ENSG00000143869	2.91628	1.53e-32	1.70265e-31	GDF7
ENSG00000181191	-2.50466	4.34487e-273	3.93177e-271	PJA1
ENSG00000137449	-0.617873	3.31053e-35	3.8946e-34	CPEB2
ENSG00000103966	1.0068	3.0925e-67	6.17189e-66	EHD4
ENSG00000176697	4.19819	5.98133e-72	1.26963e-70	BDNF
ENSG00000061337	-2.08019	8.9084e-22	7.51001e-21	LZTS1
ENSG00000124181	-0.628765	2.8389e-88	7.1886e-87	PLCG1
ENSG00000133134	-1.00395	5.79329e-89	1.48225e-87	BEX2
ENSG00000166598	0.707237	6.11789e-172	3.10747e-170	HSP90B1
ENSG00000163249	0.843632	5.46058e-25	5.01933e-24	CCNYL1
ENSG00000103710	-4.44998	3.94834e-37	4.81801e-36	RASL12
ENSG00000135373	2.93554	0	0	EHF
ENSG00000168758	-1.58356	2.59971e-265	2.29221e-263	SEMA4C
ENSG00000125820	-2.1944	8.12322e-10	4.33882e-09	NKX2-2
ENSG00000124302	-3.16993	5.01704e-67	9.98385e-66	CHST8
ENSG00000163293	2.4623	6.25661e-284	6.0265e-282	NIPAL1
ENSG00000103512	0.878246	1.40707e-149	6.09384e-148	NOMO1
ENSG00000040608	-1.04823	1.72278e-22	1.48549e-21	RTN4R
ENSG00000103485	0.603813	1.27483e-25	1.19157e-24	QPRT
ENSG00000114279	-2.85147	3.49979e-261	2.9789e-259	FGF12
ENSG00000180066	1.71925	1.18572e-09	6.2757e-09	C10orf91
ENSG00000213853	0.886196	9.79496e-198	5.90911e-196	EMP2
ENSG00000179915	-5.66215	0	0	NRXN1
ENSG00000136240	0.711166	3.44764e-142	1.41136e-140	KDELR2
ENSG00000105289	0.750564	1.32718e-43	1.84918e-42	TJP3
ENSG00000125999	1.62907	1.27992e-248	1.03074e-246	BPIFB1
ENSG00000118094	-1.82225	3.76014e-07	1.7058e-06	TREH
ENSG00000206052	-3.04901	3.51498e-86	8.72075e-85	DOK6
ENSG00000144152	-1.86681	8.5162e-15	5.74096e-14	FBLN7
ENSG00000105655	-1.31876	1.15989e-195	6.96078e-194	ISYNA1
ENSG00000237649	-0.633917	1.35609e-65	2.65406e-64	KIFC1
ENSG00000103154	-1.86555	2.87248e-06	1.22293e-05	NECAB2
ENSG00000133216	-2.68488	6.55296e-102	1.92431e-100	EPHB2
ENSG00000103089	2.33165	9.79554e-51	1.53109e-49	FA2H
ENSG00000103056	-2.12975	9.19073e-71	1.92006e-69	SMPD3
ENSG00000200534	0.760211	8.46824e-06	3.4621e-05	SNORA33
ENSG00000216490	3.05418	0	0	IFI30
ENSG00000116661	-1.85922	8.50895e-147	3.62125e-145	FBXO2
ENSG00000100219	1.10251	0	0	XBP1
ENSG00000102924	-3.45675	1.11933e-230	8.0356e-229	CBLN1
ENSG00000176641	1.84064	0	0	RNF152
ENSG00000101746	-1.64004	3.9543e-10	2.1444e-09	NOL4
ENSG00000107159	4.48797	2.5545e-47	3.7765e-46	CA9
ENSG00000083642	-0.657315	3.34555e-23	2.94078e-22	PDS5B
ENSG00000130294	-1.34427	2.68517e-88	6.80434e-87	KIF1A
ENSG00000138336	-0.827382	5.06793e-46	7.36252e-45	TET1
ENSG00000167971	-1.18232	4.35417e-34	5.00257e-33	CASKIN1
ENSG00000179588	-0.7564	3.23628e-09	1.67222e-08	ZFPM1
ENSG00000102575	1.63946	2.49763e-08	1.22223e-07	ACP5
ENSG00000225871	-1.5969	3.95657e-05	0.000152922	RP11-495P10.10
ENSG00000178623	1.50691	8.38112e-33	9.37546e-32	GPR35
ENSG00000146233	-1.43255	9.81518e-17	7.10108e-16	CYP39A1
ENSG00000271133	-1.56352	2.69414e-05	0.000105588	CTA-293F17.1
ENSG00000148735	2.69982	2.23214e-42	3.03746e-41	PLEKHS1
ENSG00000137648	1.98326	8.94003e-109	2.77957e-107	TMPRSS4
ENSG00000122852	2.36965	2.12352e-15	1.46424e-14	SFTPA1
ENSG00000165617	-1.63272	5.99381e-06	2.48025e-05	DACT1
ENSG00000170085	-1.11352	1.47656e-16	1.0609e-15	SIMC1
ENSG00000106665	-1.70703	7.6898e-62	1.43478e-60	CLIP2
ENSG00000102312	0.650258	3.45184e-10	1.87606e-09	PORCN
ENSG00000155265	-5.52254	1.07255e-285	1.04186e-283	GOLGA7B
ENSG00000122565	-0.645898	2.194e-105	6.61218e-104	CBX3
ENSG00000162627	-5.00487	2.79381e-55	4.75362e-54	SNX7
ENSG00000140832	0.763057	1.92282e-45	2.7619e-44	MARVELD3
ENSG00000077279	-5.39706	3.65311e-234	2.68992e-232	DCX
ENSG00000176153	1.03223	1.35443e-06	5.915e-06	GPX2
ENSG00000151692	-0.964585	4.95032e-26	4.67784e-25	RNF144A
ENSG00000102100	1.03679	1.66026e-78	3.74861e-77	SLC35A2
ENSG00000248771	2.67376	1.49017e-52	2.41028e-51	LINC01207
ENSG00000104936	-0.682962	1.84812e-21	1.54213e-20	DMPK
ENSG00000108798	1.57013	6.85992e-05	0.000259393	ABI3
ENSG00000102032	2.10969	3.48462e-31	3.7681e-30	RENBP
ENSG00000023909	0.689265	3.79208e-45	5.41746e-44	GCLM
ENSG00000131873	-0.716067	3.2839e-53	5.385e-52	CHSY1
ENSG00000101955	1.07672	0.000174014	0.000631473	SRPX
ENSG00000260219	0.782917	7.47987e-07	3.32958e-06	RP11-347C12.10
ENSG00000180777	1.9626	1.17314e-182	6.37297e-181	ANKRD30B
ENSG00000106049	0.944357	8.25976e-73	1.77075e-71	HIBADH
ENSG00000135046	4.71832	3.05583e-102	8.99665e-101	ANXA1
ENSG00000127948	0.592659	2.51599e-50	3.90422e-49	POR
ENSG00000101981	2.39143	2.95021e-10	1.60953e-09	F9
ENSG00000139508	0.678989	1.78097e-13	1.13453e-12	SLC46A3
ENSG00000112378	5.80534	0	0	PERP
ENSG00000178826	-0.616183	2.18311e-05	8.61395e-05	TMEM139
ENSG00000137331	1.29124	4.54661e-75	9.9519e-74	IER3
ENSG00000089876	1.36013	2.26183e-69	4.6379e-68	DHX32
ENSG00000108932	1.1844	2.37134e-52	3.82832e-51	SLC16A6
ENSG00000116678	-0.878111	1.92555e-50	2.99474e-49	LEPR
ENSG00000134308	-0.646123	3.02838e-144	1.2638e-142	YWHAQ
ENSG00000138759	0.987782	2.07759e-06	8.93584e-06	FRAS1
ENSG00000275763	-1.40678	6.03326e-05	0.000229447	C18orf65
ENSG00000116014	-5.75515	7.04927e-220	4.73444e-218	KISS1R
ENSG00000227039	1.224	9.13859e-10	4.86453e-09	ITGB2-AS1
ENSG00000160190	1.27709	6.0147e-196	3.61586e-194	SLC37A1
ENSG00000185361	-0.718267	7.26615e-18	5.45072e-17	TNFAIP8L1
ENSG00000101439	-1.01004	2.5198e-84	6.11924e-83	CST3
ENSG00000185950	-0.899039	4.11555e-16	2.91077e-15	IRS2
ENSG00000101435	-2.41633	2.21132e-09	1.15318e-08	CST9L
ENSG00000266412	-0.593835	1.65047e-65	3.22653e-64	NCOA4
ENSG00000125864	1.32241	7.46546e-22	6.30439e-21	BFSP1
ENSG00000162512	-1.83578	1.34985e-89	3.48479e-88	SDC3
ENSG00000246596	-1.31603	5.73135e-05	0.000218497	RP11-1277A3.2
ENSG00000167183	1.21747	3.7348e-110	1.17716e-108	PRR15L
ENSG00000184845	-3.23997	3.55266e-16	2.51991e-15	DRD1
ENSG00000101347	1.03896	8.69626e-33	9.72166e-32	SAMHD1
ENSG00000064195	-3.9614	7.52397e-32	8.23971e-31	DLX3
ENSG00000101180	-3.03556	6.62809e-94	1.81033e-92	HRH3
ENSG00000152778	1.10971	5.74693e-22	4.86868e-21	IFIT5
ENSG00000067141	-1.08819	3.92398e-174	2.01997e-172	NEO1
ENSG00000269293	-0.642677	2.13906e-05	8.445e-05	ZSCAN16-AS1
ENSG00000276281	0.785438	6.17182e-07	2.76558e-06	RN7SL126P
ENSG00000162878	-2.33317	0	0	PKDCC
ENSG00000167333	1.1231	9.85853e-68	1.98133e-66	TRIM68
ENSG00000107821	1.41255	4.05893e-177	2.12766e-175	KAZALD1
ENSG00000163412	0.735566	1.3889e-12	8.46362e-12	EIF4E3
ENSG00000101160	-1.07507	9.01017e-33	1.00693e-31	CTSZ
ENSG00000101098	-6.00351	3.39581e-142	1.3918e-140	RIMS4
ENSG00000163933	0.636158	6.65196e-15	4.50455e-14	RFT1
ENSG00000124766	-2.45789	0	0	SOX4
ENSG00000142156	0.801747	7.63742e-05	0.000287276	COL6A1
ENSG00000260614	-1.61278	6.42611e-05	0.000243794	RP11-491F9.1
ENSG00000109736	0.79362	2.55205e-76	5.64355e-75	MFSD10
ENSG00000064601	1.13431	7.88934e-122	2.76263e-120	CTSA
ENSG00000101844	0.806168	1.77408e-33	2.01871e-32	ATG4A
ENSG00000104312	1.12413	1.09759e-43	1.53302e-42	RIPK2
ENSG00000102879	3.05417	1.2191e-134	4.72087e-133	CORO1A
ENSG00000171067	1.06011	6.14275e-75	1.342e-73	C11orf24
ENSG00000242574	5.42028	1.99045e-171	1.00952e-169	HLA-DMB
ENSG00000166946	-0.694361	2.35318e-42	3.19963e-41	CCNDBP1
ENSG00000081051	-1.56532	8.84729e-11	4.96057e-10	AFP
ENSG00000152931	-1.03188	3.21758e-41	4.28516e-40	PART1
ENSG00000108679	1.08601	3.50085e-220	2.35585e-218	LGALS3BP
ENSG00000146278	-1.34904	4.49964e-206	2.86535e-204	PNRC1
ENSG00000265972	-1.12794	2.5161e-207	1.60522e-205	TXNIP
ENSG00000145819	4.37792	3.91269e-296	3.99245e-294	ARHGAP26
ENSG00000124466	1.07236	5.99037e-37	7.27625e-36	LYPD3
ENSG00000139055	2.61955	4.3585e-37	5.31097e-36	ERP27
ENSG00000152952	-4.67692	8.19245e-230	5.83258e-228	PLOD2
ENSG00000137491	-1.57286	1.37586e-09	7.26198e-09	SLCO2B1
ENSG00000136059	-1.38892	3.96806e-08	1.91831e-07	VILL
ENSG00000100234	3.04382	0	0	TIMP3
ENSG00000198416	0.603874	1.12486e-05	4.53982e-05	ZNF658B
ENSG00000162817	2.30532	0	0	C1orf115
ENSG00000138346	-0.614356	6.4061e-48	9.54448e-47	DNA2
ENSG00000137193	-1.18519	1.10219e-24	1.00453e-23	PIM1
ENSG00000123607	-0.887076	6.68406e-110	2.10481e-108	TTC21B
ENSG00000100564	0.810472	7.44565e-43	1.02332e-41	PIGH
ENSG00000102781	-1.13724	1.51842e-68	3.08047e-67	KATNAL1
ENSG00000137727	-3.41602	1.59774e-22	1.3794e-21	ARHGAP20
ENSG00000163362	5.56368	0	0	C1orf106
ENSG00000073711	1.08755	5.62031e-61	1.03517e-59	PPP2R3A
ENSG00000086548	3.85577	1.06452e-94	2.93551e-93	CEACAM6
ENSG00000263968	0.669437	1.48518e-05	5.93986e-05	RN7SL381P
ENSG00000188672	1.49075	2.12583e-09	1.10961e-08	RHCE
ENSG00000101213	2.07676	1.27553e-124	4.58803e-123	PTK6
ENSG00000100417	0.709021	1.56538e-28	1.58599e-27	PMM1
ENSG00000167371	-1.95232	7.16676e-60	1.29912e-58	PRRT2
ENSG00000196227	-1.01495	8.57994e-147	3.64695e-145	FAM217B
ENSG00000178184	-1.53638	2.54392e-88	6.45591e-87	PARD6G
ENSG00000099282	1.78405	0	0	TSPAN15
ENSG00000204442	0.943299	2.62386e-19	2.05435e-18	FAM155A
ENSG00000173638	-0.644708	5.50526e-26	5.19082e-25	SLC19A1
ENSG00000228901	-1.83212	5.17821e-08	2.48448e-07	HMGN2P36
ENSG00000112893	0.732141	5.44717e-94	1.49015e-92	MAN2A1
ENSG00000115525	2.80725	0	0	ST3GAL5
ENSG00000110047	0.612932	1.21887e-14	8.16228e-14	EHD1
ENSG00000101977	-2.95067	1.75432e-13	1.11839e-12	MCF2
ENSG00000167815	-0.964805	1.48717e-122	5.22895e-121	PRDX2
ENSG00000115507	1.02532	3.02674e-10	1.6505e-09	OTX1
ENSG00000146151	-2.42633	5.06107e-19	3.9321e-18	HMGCLL1
ENSG00000004799	0.709919	7.34507e-32	8.04891e-31	PDK4
ENSG00000240694	3.53972	6.59467e-157	3.02361e-155	PNMA2
ENSG00000102003	-1.93101	6.99082e-222	4.74148e-220	SYP
ENSG00000181381	-0.671632	1.13547e-31	1.23836e-30	DDX60L
ENSG00000115963	-2.66755	0	0	RND3
ENSG00000227953	1.09405	6.14294e-05	0.000233386	LINC01341
ENSG00000100218	-1.41236	6.75354e-05	0.000255511	RSPH14
ENSG00000109756	1.82176	1.7032e-87	4.29068e-86	RAPGEF2
ENSG00000162433	-3.02375	0	0	AK4
ENSG00000072310	1.42066	2.51061e-251	2.04095e-249	SREBF1
ENSG00000196139	2.15318	3.58136e-09	1.84443e-08	AKR1C3
ENSG00000171450	-3.15448	2.04462e-20	1.65125e-19	CDK5R2
ENSG00000171385	-3.50778	9.32812e-72	1.97395e-70	KCND3
ENSG00000112562	1.25364	3.93387e-36	4.70518e-35	SMOC2
ENSG00000125508	1.01446	1.04096e-14	6.98991e-14	SRMS
ENSG00000106688	-3.33282	7.93794e-74	1.71351e-72	SLC1A1
ENSG00000184058	-2.58428	7.5128e-46	1.0873e-44	TBX1
ENSG00000100290	-0.738283	3.82505e-17	2.80572e-16	BIK
ENSG00000154978	-2.43999	2.30759e-294	2.34074e-292	VOPP1
ENSG00000010270	0.609982	2.34104e-39	2.97711e-38	STARD3NL
[truncated: 3,098 more rows]

## Sheet: MM134 LTED-B DE genes
	log2FoldChange	p-value	adjusted p-value	gene_symbol
ENSG00000282164	-0.605796	5.86595e-05	0.000243004	PEG13
ENSG00000282012	1.50866	6.39301e-05	0.000263983	LL22NC03-N95F10.1
ENSG00000281909	1.69634	1.03612e-08	5.94368e-08	RP11-439M15.1
ENSG00000281406	-2.84553	4.62251e-13	3.40314e-12	BLACAT1
ENSG00000280987	-0.652123	1.24706e-12	8.96635e-12	MATR3
ENSG00000280721	-1.84841	1.04367e-06	5.09739e-06	AC133644.2
ENSG00000280614	-1.36418	0.000204511	0.000793842	CH507-513H4.4
ENSG00000280404	1.08105	7.88626e-10	4.87835e-09	AC005086.3
ENSG00000280389	1.4583	1.81138e-11	1.22525e-10	RP11-512M8.11
ENSG00000280355	-0.618274	4.81771e-05	0.000201406	RP11-119F19.5
ENSG00000280339	-0.98657	6.78732e-06	3.08069e-05	RP11-736K20.4
ENSG00000280237	-0.730866	0.000196438	0.000764548	MIR4697HG
ENSG00000280222	-1.58874	6.85191e-05	0.000281768	RP11-174G17.3
ENSG00000280217	1.55857	3.43939e-14	2.67889e-13	RP11-638F5.2
ENSG00000280202	1.21177	3.50123e-06	1.6344e-05	RP5-1180D12.1
ENSG00000280120	-0.790606	8.58356e-15	6.88687e-14	RP11-546D6.3
ENSG00000280055	-2.18491	5.97686e-08	3.22773e-07	TMEM75
ENSG00000280043	2.24547	5.4093e-19	5.22959e-18	RP11-1281K21.8
ENSG00000279998	1.43786	3.98948e-06	1.85447e-05	CH507-210P18.1
ENSG00000281881	1.15039	2.17351e-07	1.12151e-06	SPRY4-IT1
ENSG00000279713	-2.69147	2.1298e-11	1.43699e-10	CTD-3035K23.3
ENSG00000279708	-1.65962	9.46143e-06	4.24087e-05	CTD-2335A18.2
ENSG00000279605	0.779378	3.1636e-08	1.7465e-07	RP11-661A12.8
ENSG00000279377	0.927373	7.80618e-13	5.67901e-12	AC003973.3
ENSG00000279302	1.00937	7.15498e-05	0.000293533	RP11-16P20.4
ENSG00000279192	6.54387	1.24685e-96	4.98442e-95	PWAR5
ENSG00000279117	-0.878018	1.29678e-153	9.25723e-152	CTD-2562J17.6
ENSG00000278971	2.05061	2.05575e-09	1.23627e-08	RP11-644A7.2
ENSG00000278962	-2.2866	6.58554e-09	3.81337e-08	RP11-399B17.1
ENSG00000278948	-1.78893	4.3501e-23	4.86096e-22	RP5-1039K5.12
ENSG00000278915	1.84759	2.60904e-09	1.55845e-08	AC005609.18
ENSG00000278912	-1.46564	0.000140807	0.00055725	CTD-2196E14.8
ENSG00000278817	1.37564	2.31711e-61	5.76682e-60	AC007325.4
ENSG00000278743	1.02943	2.03286e-05	8.83329e-05	RP11-707G18.1
ENSG00000278616	-0.673714	0.000241512	0.000929458	BEND3P3
ENSG00000278231	-1.43348	0.000216195	0.000836859	RP5-906C1.1
ENSG00000278200	-2.56148	1.09863e-12	7.91868e-12	RP13-766D20.4
ENSG00000278163	0.87415	0.000252716	0.000969193	AL592188.9
ENSG00000277877	1.09483	1.4306e-06	6.90908e-06	RP11-11N7.5
ENSG00000277632	-1.11899	1.72342e-05	7.53682e-05	CCL3
ENSG00000279390	-0.727443	1.74108e-05	7.61091e-05	AF127577.13
ENSG00000277200	-1.73315	1.1432e-21	1.22113e-20	RP11-74E22.8
ENSG00000277053	-0.617494	6.23523e-28	8.06018e-27	GTF2IP1
ENSG00000276888	2.23884	1.57676e-11	1.07062e-10	RP11-244H18.1
ENSG00000276737	0.87415	0.000252716	0.000969193	FP236383.7
ENSG00000276588	0.863928	0.000218499	0.000845062	RN7SL322P
ENSG00000279174	2.33977	1.09076e-11	7.47293e-11	RP11-1099M24.9
ENSG00000276168	1.07332	1.017e-23	1.16159e-22	RN7SL1
ENSG00000276116	0.933557	9.20906e-11	6.00928e-10	FUT8-AS1
ENSG00000276107	-1.68616	5.48599e-09	3.1981e-08	CTD-2033D15.2
ENSG00000276047	0.829412	5.08876e-11	3.36664e-10	RN7SL711P
ENSG00000275993	-1.16253	5.55831e-25	6.58371e-24	CH507-42P11.8
ENSG00000275793	-0.883256	3.57918e-07	1.81375e-06	RIMBP3
ENSG00000275395	4.94184	2.03753e-298	3.62013e-296	FCGBP
ENSG00000275337	0.753716	4.70792e-07	2.36364e-06	RN7SL680P
ENSG00000274897	0.817664	2.80654e-09	1.67237e-08	PANO1
ENSG00000274767	-1.07691	1.07251e-31	1.53949e-30	AC131056.3
ENSG00000274269	1.80091	3.70018e-06	1.725e-05	RP4-545L17.12
ENSG00000274265	-1.19743	7.78663e-06	3.51431e-05	CH17-189H20.1
ENSG00000274020	-1.18106	3.11758e-07	1.58992e-06	LINC01138
ENSG00000274012	0.872609	5.76013e-21	5.99052e-20	Metazoa_SRP
ENSG00000274030	0.87415	0.000252716	0.000969193	AL592188.2
ENSG00000273706	-2.16357	4.89893e-70	1.37553e-68	LHX1
ENSG00000273604	-1.33473	7.21755e-64	1.86149e-62	C17orf96
ENSG00000273456	-0.708196	6.74104e-05	0.000277494	RP11-686O6.2
ENSG00000273320	0.972024	2.29711e-10	1.46663e-09	RP11-22N19.2
ENSG00000273259	2.87044	0	0	SERPINA3
ENSG00000273179	1.62576	1.62852e-05	7.14525e-05	RP11-20I20.4
ENSG00000273143	-1.58879	3.79141e-05	0.000160329	RP11-525A16.4
ENSG00000273082	-1.37618	0.000218437	0.000844925	LL22NC03-32F9.1
ENSG00000273015	-1.08346	4.35236e-61	1.07985e-59	RP11-352M15.2
ENSG00000272750	0.87426	3.43331e-05	0.000145798	RP11-378J18.8
ENSG00000272568	-2.0564	2.24158e-35	3.50896e-34	CTB-113D17.1
ENSG00000272516	-5.80992	4.41866e-78	1.41454e-76	RP11-573G6.9
ENSG00000272514	-0.699456	1.93122e-07	1.00133e-06	CFAP206
ENSG00000272508	1.29624	1.29178e-05	5.71877e-05	RP11-96C23.14
ENSG00000272485	-1.68311	4.1123e-08	2.25005e-07	RP11-284J1.1
ENSG00000272412	0.803233	1.37037e-05	6.05243e-05	RN7SL778P
ENSG00000272398	0.830965	6.61472e-258	9.40202e-256	CD24
ENSG00000272366	-2.09361	8.56838e-08	4.56785e-07	RP11-573G6.10
ENSG00000272341	1.97305	1.44886e-56	3.37726e-55	RP1-151F17.2
ENSG00000272320	1.0742	2.22855e-06	1.05807e-05	RP11-506K6.4
ENSG00000272301	-0.587384	1.09526e-05	4.87782e-05	RP11-111M22.4
ENSG00000272192	1.56833	2.80716e-05	0.000120262	CTD-2532N20.1
ENSG00000272168	-1.61505	2.73641e-29	3.67393e-28	CASC15
ENSG00000272159	-0.729044	4.5828e-09	2.68626e-08	RP11-350N15.6
ENSG00000271931	-1.81495	7.29033e-08	3.90736e-07	RP11-63L7.5
ENSG00000271824	-0.868177	7.35692e-06	3.32647e-05	AC009014.3
ENSG00000271781	-0.763938	0.000199692	0.00077636	CTD-2589H19.6
ENSG00000271698	-1.20593	0.000177515	0.00069514	GS1-393G12.13
ENSG00000271425	0.715968	5.76181e-21	5.99052e-20	NBPF10
ENSG00000271275	-1.84611	7.5598e-07	3.74837e-06	AC007326.9
ENSG00000271155	1.69501	9.8722e-06	4.41385e-05	RP11-435O5.5
ENSG00000270959	-0.90798	1.28661e-20	1.32263e-19	LPP-AS2
ENSG00000270885	-1.9003	3.98464e-51	8.4673e-50	RASL10B
ENSG00000270751	-1.34153	0.000142143	0.000562259	DEAR
ENSG00000274827	0.628512	1.5524e-07	8.10438e-07	LINC01297
ENSG00000270181	1.67655	1.90393e-12	1.35611e-11	BIVM-ERCC5
ENSG00000270164	1.42589	8.90676e-08	4.74113e-07	LINC01480
ENSG00000270141	0.766138	9.29065e-10	5.71063e-09	TERC
ENSG00000269911	-2.17938	6.84488e-13	4.9933e-12	RP1-172N19.5
ENSG00000269893	1.02121	8.90156e-46	1.71701e-44	SNHG8
ENSG00000269516	-0.820096	9.34525e-15	7.48861e-14	CYP4F23P
ENSG00000269226	-1.20881	1.16381e-07	6.13783e-07	RP11-722G7.1
ENSG00000268654	-1.88065	8.01375e-07	3.96117e-06	MIMT1
ENSG00000268628	0.714792	1.78712e-06	8.56109e-06	RP1-122P22.4
ENSG00000277879	-1.43408	1.62078e-06	7.79815e-06	RP11-129M16.4
ENSG00000268531	3.17383	1.92177e-22	2.10768e-21	RP11-32B5.8
ENSG00000268355	1.86483	1.7588e-11	1.19069e-10	AC006129.1
ENSG00000267751	0.974314	5.35884e-07	2.6816e-06	AC009005.2
ENSG00000267701	-2.30779	1.00257e-09	6.14236e-09	NA
ENSG00000267649	-1.61456	2.84292e-08	1.57655e-07	CTD-2587H24.10
ENSG00000267520	0.73594	2.46936e-11	1.66048e-10	RP11-373L24.1
ENSG00000267424	-1.56688	4.53956e-05	0.000190499	CTD-2265O21.3
ENSG00000267414	-1.54044	1.49405e-07	7.80993e-07	RP11-456K23.1
ENSG00000267322	-0.831273	1.76714e-20	1.81196e-19	SNHG22
ENSG00000267080	-0.83281	4.88672e-17	4.35448e-16	ASB16-AS1
ENSG00000267077	1.54458	9.06139e-07	4.4515e-06	RP11-127I20.5
ENSG00000267053	0.679237	0.000245207	0.000942884	CTD-3162L10.1
ENSG00000267040	0.743683	0.000222904	0.000861163	RP11-35G9.3
ENSG00000267034	-3.02518	5.42952e-14	4.18817e-13	RP11-384O8.1
ENSG00000266970	-1.57771	7.52375e-06	3.39903e-05	RP11-806H10.4
ENSG00000279508	2.47529	5.16656e-13	3.79494e-12	AL589743.1
ENSG00000266820	1.09793	4.08532e-05	0.000172228	RP13-104F24.1
ENSG00000277630	2.67285	4.47729e-22	4.83907e-21	BX072566.1
ENSG00000266420	0.889086	3.6538e-14	2.84243e-13	RN7SL118P
ENSG00000266028	-0.873257	2.54535e-45	4.85118e-44	SRGAP2
ENSG00000265918	0.835623	4.69786e-16	3.99687e-15	RN7SL543P
ENSG00000265766	4.91922	3.1121e-59	7.5343e-58	CXADRP3
ENSG00000282390	-1.69004	1.16902e-06	5.68615e-06	RP11-29A19.2
ENSG00000264916	1.04891	9.52582e-08	5.05887e-07	RN7SL230P
ENSG00000264833	1.08826	2.67324e-07	1.37052e-06	RN7SL468P
ENSG00000277017	-0.691514	6.57534e-05	0.000271057	XXbac-B33L19.6
ENSG00000264714	-1.91746	9.70839e-07	4.75692e-06	RP11-21G15.1
ENSG00000264364	-0.603742	6.19147e-30	8.48005e-29	DYNLL2
ENSG00000272143	0.966859	3.02741e-08	1.67392e-07	FGF14-AS2
ENSG00000264222	2.56532	3.65506e-23	4.09718e-22	RP11-757O6.1
ENSG00000263969	0.914327	1.03395e-06	5.0522e-06	RN7SL678P
ENSG00000263812	-1.36803	4.28085e-09	2.51665e-08	LINC00908
ENSG00000263612	1.46194	9.04451e-08	4.81205e-07	AF186192.6
ENSG00000263535	-1.52926	1.9755e-12	1.40584e-11	AK4P1
ENSG00000273032	-1.69356	1.88906e-09	1.1386e-08	DGCR9
ENSG00000263427	1.78474	3.20561e-07	1.63102e-06	RP11-599B13.3
ENSG00000263327	0.798046	1.98769e-06	9.47934e-06	TAPT1-AS1
ENSG00000263155	-2.16538	4.88844e-08	2.65789e-07	MYZAP
ENSG00000262292	-1.53426	0.000144719	0.000572024	RP11-160E2.11
ENSG00000261685	2.28963	1.04332e-15	8.75299e-15	RP11-401P9.4
ENSG00000261678	-2.80453	7.05508e-52	1.51836e-50	SCRT1
ENSG00000261643	-1.12281	1.67106e-05	7.31984e-05	RP11-529E10.6
ENSG00000269891	-1.94224	1.3501e-06	6.53119e-06	ARHGAP19-SLIT1
ENSG00000261439	-2.24448	1.08277e-08	6.20242e-08	DKFZP434H168
ENSG00000261385	1.31782	3.49266e-05	0.000148181	RP11-388M20.2
ENSG00000261379	-1.92939	1.52459e-06	7.34639e-06	RP11-395N3.1
ENSG00000261226	-1.52328	3.55545e-07	1.80235e-06	RP11-830F9.7
ENSG00000261189	-0.729789	0.000136631	0.000541781	RP3-512B11.3
ENSG00000269113	-2.38904	3.15814e-09	1.8735e-08	TRABD2B
ENSG00000261115	4.69074	0	0	TMEM178B
ENSG00000261064	1.49286	1.9373e-06	9.24865e-06	RP11-1000B6.3
ENSG00000261051	-2.04117	1.54294e-07	8.05631e-07	RP11-274H2.5
ENSG00000274214	1.98864	1.54316e-08	8.74569e-08	RP11-757O6.6
ENSG00000261026	-1.67632	2.71078e-05	0.00011638	CTD-3247F14.2
ENSG00000260955	1.25128	8.37745e-05	0.000341342	RP11-30L15.6
ENSG00000260903	-4.16823	5.04675e-212	5.66316e-210	XKR7
ENSG00000260788	1.45993	5.23479e-05	0.000218072	RP11-298D21.1
ENSG00000260691	1.60992	3.9694e-06	1.84541e-05	ANKRD20A1
ENSG00000260682	0.647817	1.361e-09	8.26863e-09	RN7SKP176
ENSG00000260469	-4.5882	4.45796e-56	1.0279e-54	C15orf59-AS1
ENSG00000260404	0.780077	4.22694e-07	2.13052e-06	RP11-384K6.6
ENSG00000260401	-0.642833	3.308e-06	1.54781e-05	RP11-800A3.4
ENSG00000260400	-1.19288	1.64309e-07	8.56524e-07	RP11-119F7.5
ENSG00000260296	-0.982793	1.35188e-06	6.53881e-06	RP11-395I6.3
ENSG00000260246	1.27595	0.000234014	0.000901906	AC000032.2
ENSG00000260231	0.869541	3.98862e-16	3.40523e-15	JHDM1D-AS1
ENSG00000260228	0.960276	2.3275e-06	1.10243e-05	RP11-483P21.2
ENSG00000260009	-1.57262	0.000100204	0.000403504	RP11-65J21.1
ENSG00000259867	1.38314	6.33807e-07	3.16024e-06	RP11-525K10.3
ENSG00000259725	1.30191	2.12402e-19	2.08177e-18	CTD-3032H12.1
ENSG00000259674	2.45644	3.68524e-18	3.45117e-17	RP11-356M20.1
ENSG00000259448	-1.24422	5.15095e-05	0.000214747	RP11-16E12.1
ENSG00000260253	2.09188	2.76066e-14	2.15759e-13	RP4-676L2.1
ENSG00000259319	-1.44325	3.04888e-09	1.8107e-08	RP11-293M10.6
ENSG00000259171	0.998045	8.78254e-22	9.419e-21	RP11-903H12.5
ENSG00000259120	2.63276	1.32722e-27	1.69783e-26	SMIM6
ENSG00000259070	1.29346	3.01105e-08	1.66574e-07	LINC00639
ENSG00000259024	0.758599	2.6872e-09	1.60424e-08	TVP23C-CDRT4
ENSG00000258941	3.44923	2.01726e-29	2.7221e-28	RP11-407N17.3
ENSG00000268439	0.597586	1.65606e-05	7.25713e-05	RP3-461F17.3
ENSG00000272631	-0.781083	2.12233e-07	1.09616e-06	RP11-359E3.4
ENSG00000258818	0.849467	1.08074e-46	2.11138e-45	RNASE4
ENSG00000258689	1.87996	3.95303e-08	2.16513e-07	LINC01269
ENSG00000258647	1.1753	7.6039e-07	3.76849e-06	LINC00930
ENSG00000258616	1.65455	6.64017e-08	3.57387e-07	RP11-369C8.1
ENSG00000258441	-0.621208	5.14218e-16	4.3656e-15	LINC00641
ENSG00000270276	-0.823699	3.8617e-09	2.2782e-08	HIST2H4B
ENSG00000258334	-1.36968	5.35768e-16	4.54614e-15	RP11-161H23.9
ENSG00000258314	1.50906	0.000186547	0.000728623	CTD-2314B22.1
ENSG00000258301	0.820872	4.09749e-08	2.24271e-07	RP11-488C13.5
ENSG00000258297	-1.14156	3.0076e-13	2.24105e-12	RP11-658F2.8
ENSG00000258056	0.684597	1.19061e-12	8.56627e-12	RP11-644F5.11
ENSG00000257950	-0.742126	6.06337e-09	3.51929e-08	P2RX5-TAX1BP3
ENSG00000257913	-0.711981	6.25615e-06	2.84808e-05	RP11-386G11.5
ENSG00000257891	1.27611	7.80347e-13	5.67833e-12	CTD-2311B13.1
ENSG00000266176	-1.61608	2.22755e-06	1.05775e-05	RP11-855A2.5
ENSG00000265787	2.95722	1.16464e-101	4.93983e-100	CYP4F35P
ENSG00000257542	-1.73805	1.21235e-05	5.38054e-05	OR7E47P
ENSG00000257503	-2.45364	9.52268e-10	5.84988e-09	CYB5AP5
ENSG00000275719	0.775055	7.4243e-05	0.000304133	CTB-147N14.6
ENSG00000257108	-1.80836	1.39085e-17	1.26618e-16	NHLRC4
ENSG00000279196	1.56478	9.53023e-17	8.37724e-16	RP11-1072A3.3
ENSG00000257093	0.765307	2.40594e-104	1.04261e-102	KIAA1147
ENSG00000257002	1.29839	1.62197e-05	7.11844e-05	AP000438.2
ENSG00000256594	-0.651131	1.09337e-16	9.58261e-16	RP11-705C15.2
ENSG00000256463	-2.58882	3.67754e-15	3.01258e-14	SALL3
ENSG00000273175	0.762582	1.68674e-06	8.10208e-06	RP11-11N7.4
ENSG00000256229	-1.7146	7.07321e-109	3.25012e-107	ZNF486
ENSG00000273305	-1.79615	1.02638e-06	5.01598e-06	RP11-440D17.4
ENSG00000255874	-0.646826	1.13202e-05	5.0359e-05	LINC00346
ENSG00000255864	-2.48981	5.8551e-10	3.65085e-09	RP11-444D3.1
ENSG00000268357	-0.834644	3.38982e-13	2.51823e-12	VN1R81P
ENSG00000270168	3.79338	9.7183e-105	4.24591e-103	LA16c-380H5.3
ENSG00000274349	1.06498	6.49799e-26	7.95301e-25	ZNF658
ENSG00000255571	-1.47121	1.59575e-48	3.24435e-47	MIR9-3HG
ENSG00000255408	-2.39878	1.0141e-19	1.01003e-18	PCDHA3
ENSG00000255240	1.07777	9.75077e-26	1.18615e-24	RP11-142C4.6
ENSG00000255135	-0.592496	6.66203e-39	1.12729e-37	RP11-111M22.3
ENSG00000255129	-1.1289	6.46864e-08	3.48507e-07	RP11-839D17.3
ENSG00000255100	-0.693968	2.07165e-08	1.16173e-07	RP11-21L23.3
ENSG00000254981	-1.11362	3.51539e-13	2.60848e-12	RP11-350N15.3
ENSG00000254837	-0.615396	1.0722e-25	1.30232e-24	AP001372.2
ENSG00000254692	0.990846	1.80704e-06	8.65004e-06	RP11-468E2.1
ENSG00000254531	-0.917572	3.09486e-06	1.45127e-05	FLJ20021
ENSG00000254429	-1.15982	5.8615e-08	3.16917e-07	CTD-2562J17.7
ENSG00000254402	-1.11372	2.37048e-08	1.3235e-07	LRRC24
ENSG00000254343	1.46439	6.9733e-15	5.6288e-14	RP11-760H22.2
ENSG00000254278	1.41281	0.000249474	0.000958368	RP11-278I4.2
ENSG00000254233	1.85644	5.49244e-07	2.74588e-06	RP11-242J7.1
ENSG00000280583	0.865182	1.16432e-06	5.66502e-06	AC138645.1
ENSG00000254057	2.14426	1.91864e-16	1.66152e-15	RP3-388N13.3
ENSG00000254054	1.5589	2.45764e-05	0.000105941	RP11-156K13.3
ENSG00000253972	3.53176	1.31972e-103	5.68049e-102	RP11-4K16.2
ENSG00000265802	1.01646	1.21867e-07	6.41128e-07	RN7SL49P
ENSG00000281991	0.829125	1.16967e-09	7.13879e-09	TMEM265
ENSG00000253632	1.40061	0.00019479	0.000758225	RP11-486M23.1
ENSG00000255201	-1.11911	3.37182e-22	3.66658e-21	RP11-350N15.4
ENSG00000253320	0.638209	1.21164e-06	5.88453e-06	AZIN1-AS1
ENSG00000272636	-2.211	1.43293e-55	3.26399e-54	DOC2B
ENSG00000272904	1.85848	3.48024e-07	1.76669e-06	RP11-392E22.11
ENSG00000268204	-0.812259	0.000197334	0.000767661	CTD-3214H19.6
ENSG00000277268	-2.28958	2.37589e-24	2.76605e-23	RP11-445F12.1
ENSG00000258366	-0.941679	3.46632e-78	1.11638e-76	RTEL1
ENSG00000251364	0.649287	5.73807e-05	0.000238015	CTD-2516F10.2
ENSG00000251348	-1.58724	2.77346e-05	0.000118914	HSPD1P11
ENSG00000251201	1.08012	5.68162e-18	5.26831e-17	TMED7-TICAM2
ENSG00000251191	3.61047	1.80508e-31	2.57831e-30	LINC00589
ENSG00000251061	0.819908	0.00013425	0.000532883	RP11-789C1.2
ENSG00000250942	-0.890407	2.6238e-05	0.00011283	ENPP7P11
ENSG00000250903	0.824746	3.07509e-18	2.88994e-17	GMDS-AS1
ENSG00000261687	1.65869	7.80608e-06	3.52259e-05	RP11-473C18.3
ENSG00000250696	1.72259	1.77919e-05	7.77007e-05	RP11-704M14.1
ENSG00000273749	1.28478	9.18355e-308	1.70755e-305	CYFIP1
ENSG00000250685	-1.43077	1.45688e-10	9.4145e-10	RP11-486L19.2
ENSG00000250588	0.755098	7.75105e-05	0.00031695	IQCJ-SCHIP1
ENSG00000250366	-1.08857	1.45571e-06	7.02189e-06	TUNAR
ENSG00000250303	-2.21552	6.18533e-17	5.48262e-16	RP11-356J5.12
ENSG00000250230	1.49242	1.2315e-14	9.79232e-14	RP11-855O10.2
ENSG00000279312	1.13812	1.69726e-07	8.83321e-07	RP3-331H24.7
ENSG00000250167	1.6537	6.58529e-10	4.09576e-09	CTC-321K16.1
ENSG00000250159	-2.28532	6.3466e-09	3.679e-08	RP11-381K20.2
ENSG00000250120	-1.11784	9.67679e-94	3.75119e-92	PCDHA10
ENSG00000250067	0.817042	2.10266e-07	1.08688e-06	YJEFN3
ENSG00000268635	-0.910698	2.33398e-13	1.74726e-12	RP11-739B23.1
ENSG00000260793	-1.04765	2.51405e-08	1.40024e-07	RP5-882C2.2
ENSG00000256940	1.23104	0.00015057	0.000593832	RP11-783K16.5
ENSG00000272273	1.37005	1.31549e-07	6.90364e-07	XXbac-BPG252P9.10
ENSG00000249464	2.98128	2.98534e-80	9.86302e-79	LINC01091
ENSG00000249409	1.21461	1.51145e-24	1.76932e-23	RP11-501E14.1
ENSG00000255545	4.12558	6.82811e-76	2.10985e-74	RP11-627G23.1
ENSG00000261488	-3.04604	6.53514e-18	6.04747e-17	RP11-757F18.5
ENSG00000249014	-0.849048	0.000255866	0.000980323	HMGN2P4
ENSG00000281864	0.865182	1.16432e-06	5.66502e-06	AC068152.1
ENSG00000248740	1.31822	0.000175199	0.000686646	RP11-328K4.1
ENSG00000250413	2.70775	2.00149e-17	1.80971e-16	RP11-448G15.1
ENSG00000248668	-2.05006	1.03436e-09	6.325e-09	OXCT1-AS1
ENSG00000248527	1.16339	7.25524e-10	4.49758e-09	MTATP6P1
ENSG00000248383	-0.740418	2.53638e-15	2.09169e-14	PCDHAC1
ENSG00000275011	1.90417	6.02415e-08	3.25211e-07	RP11-599B13.9
ENSG00000279773	3.46212	3.25491e-57	7.66535e-56	AL050303.10
ENSG00000248050	1.97767	4.68295e-07	2.35221e-06	RP11-422N16.3
ENSG00000247746	-1.53174	7.33793e-39	1.23904e-37	USP51
ENSG00000247317	1.51139	3.41016e-28	4.43335e-27	RP11-273G15.2
ENSG00000246922	0.650779	6.4419e-06	2.93056e-05	UBAP1L
ENSG00000246705	0.668051	5.95326e-60	1.45448e-58	H2AFJ
ENSG00000246223	-1.32823	1.09881e-13	8.35103e-13	LINC01550
ENSG00000245904	0.847068	2.38498e-05	0.000102948	RP11-796E2.4
ENSG00000261594	-2.01945	3.19565e-07	1.62661e-06	TPBGL
ENSG00000245146	0.610042	5.97324e-08	3.22632e-07	LINC01024
ENSG00000244757	-1.8309	6.33486e-07	3.15913e-06	RP11-45A16.4
ENSG00000244671	0.729836	6.99559e-05	0.00028727	RN7SL280P
ENSG00000244588	2.58178	1.31781e-19	1.30641e-18	RAD21L1
ENSG00000244567	-1.15476	4.82597e-05	0.000201698	AC096772.6
ENSG00000244514	1.04412	7.14151e-07	3.54482e-06	RN7SL125P
ENSG00000244457	-2.0817	2.26938e-07	1.16947e-06	ENO1P1
ENSG00000244405	3.26589	8.86589e-68	2.42757e-66	ETV5
ENSG00000276043	-0.720526	8.74501e-97	3.51349e-95	UHRF1
ENSG00000277925	0.727052	8.52016e-20	8.50713e-19	Telomerase-vert
ENSG00000244219	0.765408	3.37497e-05	0.000143359	GS1-259H13.2
ENSG00000244176	1.49516	0.000116975	0.000467154	RP11-810P12.1
ENSG00000244091	0.902226	5.23064e-09	3.05592e-08	RN7SL483P
ENSG00000243989	0.963401	5.20462e-50	1.08861e-48	ACY1
ENSG00000243742	1.263	1.08249e-32	1.59242e-31	RPLP0P2
ENSG00000243449	-0.626692	8.12038e-09	4.67419e-08	C4orf48
ENSG00000243446	0.970478	3.09212e-09	1.83604e-08	RN7SL284P
ENSG00000260257	-0.800786	4.32991e-16	3.69168e-15	RP5-1085F17.3
ENSG00000243422	1.17206	4.63958e-05	0.000194416	RPL23AP49
ENSG00000274928	-1.71893	2.16512e-05	9.38122e-05	KRT89P
ENSG00000243267	1.09042	4.29601e-05	0.000180872	RN7SL614P
ENSG00000279154	1.10264	8.29752e-07	4.09385e-06	RP11-345K9.2
ENSG00000242861	0.855406	3.49724e-07	1.77504e-06	RP11-285F7.2
ENSG00000242575	4.31905	6.03587e-48	1.21557e-46	AC012501.3
ENSG00000278709	-0.750338	1.19019e-06	5.78471e-06	NKILA
ENSG00000242113	0.838954	3.36048e-05	0.0001428	RN7SL124P
ENSG00000242111	1.79496	4.92978e-06	2.27011e-05	TOPORSLP1
ENSG00000260693	1.78714	2.24458e-06	1.06552e-05	AC026150.8
ENSG00000241912	1.50292	6.79597e-05	0.000279575	RP11-292E2.2
ENSG00000241839	-0.760748	4.56225e-05	0.000191376	PLEKHO2
ENSG00000253741	0.865424	1.83349e-10	1.17674e-09	CTD-2292P10.4
ENSG00000241757	0.881407	5.35258e-17	4.75899e-16	RN7SL714P
ENSG00000241529	0.722067	1.68968e-07	8.79807e-07	RN7SL767P
ENSG00000241484	-0.958604	2.35569e-76	7.32854e-75	ARHGAP8
ENSG00000241322	1.25925	0.000170634	0.000669496	CDRT1
ENSG00000272622	-2.44481	3.26797e-11	2.18144e-10	RP11-395N3.2
ENSG00000244968	-2.29941	2.99959e-32	4.36244e-31	LIFR-AS1
ENSG00000240859	0.801513	1.79139e-08	1.01131e-07	AC093627.10
ENSG00000279442	0.628671	6.52499e-12	4.52462e-11	LA16c-60D12.2
ENSG00000240499	1.49811	2.18569e-05	9.46394e-05	RP5-1101C3.1
ENSG00000240481	0.856745	6.60464e-05	0.00027223	RN7SL38P
ENSG00000275183	1.18924	1.10634e-23	1.26093e-22	LENG9
ENSG00000271524	-0.997112	8.42915e-05	0.000343274	BNIP3P17
ENSG00000271367	-2.86366	4.66041e-15	3.79441e-14	RP3-483K16.4
ENSG00000239677	-1.43948	6.11636e-05	0.000252886	PDZRN3-AS1
ENSG00000281657	0.628199	5.80412e-14	4.46742e-13	LINC00976
ENSG00000239440	-2.14299	7.75074e-09	4.46785e-08	RP11-260O18.1
ENSG00000239316	0.966094	4.9671e-05	0.000207325	RN7SL11P
ENSG00000239264	0.80092	4.20104e-145	2.7759e-143	TXNDC5
ENSG00000239218	-0.940482	1.98141e-29	2.67486e-28	RPS20P22
ENSG00000239211	0.970754	4.3226e-12	3.02298e-11	RN7SL563P
ENSG00000264112	-0.636059	8.67746e-13	6.28713e-12	RP11-159D12.2
ENSG00000258203	-1.55938	1.60721e-14	1.27103e-13	RP1-228P16.3
ENSG00000244642	0.765611	3.87386e-09	2.28495e-08	RN7SL396P
ENSG00000238832	1.49376	5.89833e-05	0.000244314	snoU109
ENSG00000259780	2.45006	2.40194e-14	1.88368e-13	RP11-304L19.12
ENSG00000238197	-0.998223	5.84363e-21	6.07362e-20	PAXBP1-AS1
ENSG00000261587	-1.79914	6.07343e-08	3.27767e-07	TMEM249
ENSG00000238145	2.98769	2.3356e-23	2.63474e-22	RP11-346M5.1
ENSG00000238129	1.48846	0.000136594	0.000541717	RP3-410C9.2
ENSG00000238117	1.49009	2.16049e-05	9.3624e-05	AP004372.1
ENSG00000238078	1.26896	2.48792e-07	1.27879e-06	LINC01352
ENSG00000261664	1.63836	3.31212e-29	4.43386e-28	TTC39A-AS1
ENSG00000257150	1.29659	1.67785e-05	7.34656e-05	PGAM1P5
ENSG00000237943	1.94559	3.05926e-11	2.04597e-10	PRKCQ-AS1
ENSG00000237807	1.82971	6.64569e-14	5.1029e-13	RP11-400K9.4
ENSG00000237750	-3.00167	1.78731e-14	1.41066e-13	AC007740.1
ENSG00000279406	-0.80633	9.30576e-07	4.56803e-06	RP11-327E2.5
ENSG00000237742	-2.15793	9.64653e-23	1.06712e-21	RP11-624M8.1
ENSG00000237541	1.99293	2.09936e-104	9.13463e-103	HLA-DQA2
ENSG00000237517	-1.29765	1.73696e-32	2.54348e-31	DGCR5
ENSG00000242173	-2.39056	3.85517e-18	3.60609e-17	ARHGDIG
ENSG00000271347	3.56057	1.39636e-19	1.38214e-18	RP11-701H24.7
ENSG00000237414	0.601931	1.43556e-06	6.92991e-06	RP11-321L2.2
ENSG00000237379	1.65786	7.50831e-06	3.39253e-05	CBX1P3
ENSG00000271727	-1.27836	1.45479e-10	9.40291e-10	RP11-532F6.4
ENSG00000256663	-0.980812	4.84507e-09	2.83532e-08	RP11-424C20.2
ENSG00000237172	2.91966	1.99166e-133	1.20635e-131	B3GNT9
ENSG00000251141	0.946034	8.48159e-06	3.81505e-05	RP11-53O19.1
ENSG00000237021	-0.852861	4.0475e-05	0.00017074	RP3-486I3.7
ENSG00000236901	-1.0637	1.92826e-43	3.55025e-42	MIR600HG
ENSG00000236824	1.56517	1.51812e-156	1.11101e-154	BCYRN1
ENSG00000236699	3.81415	2.53475e-130	1.47926e-128	ARHGEF38
ENSG00000236431	-1.88651	2.07868e-07	1.075e-06	AC009237.11
ENSG00000236385	1.26863	8.68167e-05	0.000352973	RP11-114M1.2
ENSG00000236296	-0.859487	1.43907e-05	6.34535e-05	GUSBP5
ENSG00000236289	3.50905	3.24026e-32	4.70603e-31	GACAT3
ENSG00000235961	1.49354	8.32411e-05	0.000339212	PNMA6A
ENSG00000235944	0.676147	0.000127406	0.000506788	ZNF815P
ENSG00000235823	0.757204	1.26774e-15	1.05969e-14	OLMALINC
ENSG00000235750	0.743391	7.2242e-118	3.66144e-116	KIAA0040
ENSG00000235713	1.76905	6.30143e-06	2.86829e-05	RP4-604G5.3
ENSG00000235703	0.730887	8.808e-06	3.95575e-05	LINC00894
ENSG00000235584	-0.876558	3.39814e-47	6.725e-46	AC008268.1
ENSG00000235568	1.02526	1.74757e-13	1.31411e-12	NFAM1
ENSG00000235501	0.882288	2.20814e-09	1.32418e-08	RP4-639F20.1
ENSG00000235343	4.23685	3.15477e-47	6.24722e-46	AC005301.8
ENSG00000235209	-1.47388	1.52853e-10	9.8636e-10	CTA-150C2.13
ENSG00000235169	0.771097	1.29292e-10	8.37191e-10	SMIM1
ENSG00000235123	2.67932	6.69684e-40	1.15208e-38	DSCAM-AS1
ENSG00000235091	-1.51511	5.81597e-39	9.8674e-38	WI2-85898F10.1
ENSG00000235027	1.03329	6.88448e-10	4.27685e-09	AC068580.6
ENSG00000235007	-1.57113	3.01958e-05	0.000128776	RP11-344B5.4
ENSG00000282416	1.16554	6.36013e-07	3.16976e-06	LLNLF-173C4.2
ENSG00000234869	0.943271	8.90868e-10	5.48534e-09	RP3-439F8.1
ENSG00000244306	0.829165	1.8618e-06	8.89886e-06	LINC01296
ENSG00000234752	-1.46481	5.14073e-08	2.79079e-07	RP11-428L9.1
ENSG00000234745	-0.846536	1.55599e-64	4.07553e-63	HLA-B
ENSG00000265962	-1.99066	6.88322e-07	3.42298e-06	GACAT2
ENSG00000234602	-1.32093	4.72246e-15	3.842e-14	MCIDAS
ENSG00000253106	-0.641671	2.94524e-07	1.50586e-06	RP11-158K1.3
ENSG00000241388	1.96473	4.76554e-41	8.3648e-40	HNF1A-AS1
ENSG00000243709	1.72963	3.52273e-18	3.30286e-17	LEFTY1
ENSG00000240541	-3.09367	3.12059e-18	2.93098e-17	TM4SF1-AS1
ENSG00000250644	1.07078	2.16825e-06	1.03051e-05	RP11-295K3.1
ENSG00000234085	2.59774	2.13696e-13	1.60164e-12	RP11-368M16.7
ENSG00000233895	1.57765	1.10506e-10	7.18018e-10	RP1-122P22.2
ENSG00000233834	2.02825	6.56617e-29	8.717e-28	AC005083.1
ENSG00000250522	1.63562	2.97396e-05	0.000126898	AC004066.3
ENSG00000233718	0.912674	1.96897e-10	1.26192e-09	MYCNOS
ENSG00000233396	0.72313	2.11838e-07	1.09429e-06	RP11-458D21.1
ENSG00000253426	0.8057	0.00018553	0.000725091	RP11-10A14.4
ENSG00000233255	2.12454	4.99515e-11	3.30745e-10	AC019181.2
ENSG00000233237	1.4884	3.51242e-35	5.46355e-34	LINC00472
ENSG00000233078	2.2412	2.31891e-10	1.47997e-09	RP11-5P18.5
ENSG00000233028	-2.94588	4.62783e-14	3.58533e-13	RP4-725G10.4
ENSG00000280587	1.5328	1.41149e-12	1.01054e-11	LINC01348
ENSG00000232956	0.608522	1.492e-28	1.96119e-27	SNHG15
ENSG00000238005	0.661955	5.19489e-05	0.000216494	RP11-443B7.1
ENSG00000276936	0.87415	0.000252716	0.000969193	AL353644.9
ENSG00000232843	1.74478	1.22917e-05	5.4499e-05	SNX18P2
ENSG00000232767	-0.67612	1.43303e-06	6.91873e-06	RP11-498B4.5
ENSG00000232682	1.21228	0.000179666	0.000703293	RP11-388P9.2
ENSG00000232653	2.28097	1.24492e-51	2.66848e-50	GOLGA8N
ENSG00000232504	1.17673	2.8018e-05	0.000120049	ST3GAL5-AS1
ENSG00000232502	1.46788	0.000210876	0.000817557	AC073464.7
ENSG00000232445	-0.606734	0.000201906	0.000784492	RP11-132A1.4
ENSG00000232433	1.87905	5.82535e-07	2.90822e-06	GXYLT1P3
ENSG00000272695	-1.07753	0.000117549	0.000469213	GAS6-AS2
ENSG00000232300	-1.04968	7.91318e-16	6.67558e-15	FAM215B
ENSG00000232233	1.3554	2.89184e-24	3.35938e-23	RP11-573D15.2
ENSG00000232224	1.3722	8.5621e-06	3.85018e-05	LINC00202-1
ENSG00000244187	0.768781	1.07014e-34	1.65015e-33	TMEM141
ENSG00000231982	1.77321	1.90629e-16	1.65127e-15	RP11-573D15.1
ENSG00000231918	1.29941	9.16506e-06	4.11206e-05	AC007682.1
ENSG00000231840	-1.32021	9.00242e-06	4.04136e-05	AC073342.12
ENSG00000231789	-0.913637	9.1152e-05	0.000369565	PIK3CD-AS2
ENSG00000231764	-2.08404	7.15401e-25	8.44876e-24	DLX6-AS1
ENSG00000231651	1.18306	0.000153607	0.000605362	DLG3-AS1
ENSG00000233723	-1.74004	3.22146e-18	3.02305e-17	LINC01122
ENSG00000231483	2.11387	5.13931e-11	3.39588e-10	RP11-336A10.5
ENSG00000240490	0.679067	2.08918e-08	1.17118e-07	RN7SL277P
ENSG00000272894	0.819671	1.67784e-05	7.34656e-05	RP5-1159O4.1
ENSG00000235026	-1.36683	1.2766e-17	1.16482e-16	DPP10-AS1
ENSG00000231312	0.894537	2.33319e-19	2.28399e-18	AC007246.3
ENSG00000231227	-1.79153	9.14171e-06	4.10274e-05	RP11-85O21.4
ENSG00000273654	1.31411	0.000124078	0.000494351	CTB-52I2.4
ENSG00000254793	1.37121	3.9319e-05	0.000166023	FDPSP4
ENSG00000126803	1.53226	5.62029e-104	2.43224e-102	HSPA2
ENSG00000181885	0.631508	3.57837e-45	6.77962e-44	CLDN7
ENSG00000223764	-3.57819	3.4229e-130	1.99033e-128	RP11-54O7.3
ENSG00000224805	-0.688112	4.03058e-05	0.0001701	LINC00853
ENSG00000180964	1.53208	7.16536e-157	5.26794e-155	TCEAL8
ENSG00000214100	-1.49495	3.02321e-06	1.41934e-05	AC079776.2
ENSG00000180879	0.886801	5.40972e-134	3.2954e-132	SSR4
ENSG00000138642	-1.74208	1.22545e-16	1.07197e-15	HERC6
ENSG00000169047	-1.80498	5.29823e-230	6.51702e-228	IRS1
ENSG00000148935	1.00187	5.97092e-09	3.4694e-08	GAS2
ENSG00000108852	-1.05461	4.13431e-74	1.23224e-72	MPP2
ENSG00000180488	0.670591	7.91497e-56	1.81324e-54	FAM73A
ENSG00000085831	0.825623	2.35404e-140	1.50269e-138	TTC39A
ENSG00000223802	-1.24185	2.24748e-37	3.66531e-36	CERS1
ENSG00000230873	0.978084	2.41082e-36	3.86274e-35	STMND1
ENSG00000180178	-1.65234	3.66811e-22	3.98065e-21	FAR2P1
ENSG00000180155	0.611999	2.63577e-25	3.15356e-24	LYNX1
ENSG00000226122	-1.71491	1.69772e-05	7.42748e-05	DDC-AS1
ENSG00000184897	-0.590593	1.8956e-27	2.41526e-26	H1FX
ENSG00000114315	2.0296	0	0	HES1
ENSG00000103942	-1.44137	6.96152e-284	1.13013e-281	HOMER2
ENSG00000255189	1.15516	4.45195e-05	0.000187069	GLYATL1P1
ENSG00000173621	-1.30469	4.89568e-59	1.18165e-57	LRFN4
ENSG00000231240	-1.86385	8.04352e-08	4.30167e-07	KLF2P1
ENSG00000179841	-0.753466	1.82553e-07	9.47766e-07	AKAP5
ENSG00000233184	0.980096	1.12393e-11	7.69526e-11	RP11-421L21.3
ENSG00000102221	-0.733779	6.78313e-38	1.11993e-36	JADE3
ENSG00000168505	-1.56524	0.000104837	0.000420992	GBX2
ENSG00000179456	2.97086	4.62442e-167	3.72528e-165	ZBTB18
ENSG00000179403	1.24123	4.46908e-70	1.25704e-68	VWA1
ENSG00000179240	-0.754754	2.1542e-98	8.78744e-97	RP11-111M22.2
ENSG00000179222	1.61926	8.22381e-220	9.81365e-218	MAGED1
ENSG00000164985	-0.855827	6.94277e-158	5.15167e-156	PSIP1
ENSG00000229619	1.25943	2.71751e-05	0.00011664	MBNL1-AS1
ENSG00000179104	-1.14675	1.3179e-68	3.63658e-67	TMTC2
ENSG00000179051	-0.709283	5.86002e-107	2.63585e-105	RCC2
ENSG00000196748	-2.09613	6.02506e-08	3.25211e-07	CLPSL2
ENSG00000179023	-1.22861	2.69604e-08	1.49691e-07	KLHDC7A
ENSG00000178726	1.00436	8.74994e-09	5.03204e-08	THBD
ENSG00000170965	-0.846112	2.28185e-08	1.27513e-07	PLAC1
ENSG00000178607	1.09755	1.98177e-58	4.73684e-57	ERN1
ENSG00000178538	4.46041	4.532e-67	1.22621e-65	CA8
ENSG00000226777	-2.27146	3.17096e-19	3.08519e-18	KIAA0125
ENSG00000207205	1.91753	1.13786e-08	6.50751e-08	RNVU1-15
ENSG00000096060	1.34771	3.88472e-88	1.41986e-86	FKBP5
ENSG00000178162	-1.76349	2.83357e-22	3.08863e-21	FAR2P2
ENSG00000178149	0.889481	2.65989e-100	1.11197e-98	DALRD3
ENSG00000276203	0.8452	1.46937e-09	8.91177e-09	ANKRD20A3
ENSG00000178075	0.695701	3.46039e-14	2.69459e-13	GRAMD1C
ENSG00000077157	-0.685006	5.25e-22	5.65701e-21	PPP1R12B
ENSG00000124507	-0.903005	1.99239e-09	1.19952e-08	PACSIN1
ENSG00000177700	0.588088	1.25044e-28	1.65045e-27	POLR2L
ENSG00000143079	-0.762633	1.44794e-21	1.53843e-20	CTTNBP2NL
ENSG00000156313	-0.903511	7.407e-25	8.74431e-24	RPGR
ENSG00000177685	0.801408	1.10709e-33	1.66851e-32	CRACR2B
ENSG00000171631	-0.846183	1.50855e-08	8.55527e-08	P2RY6
ENSG00000167552	-0.662446	1.7267e-81	5.81892e-80	TUBA1A
ENSG00000177374	-1.37139	0.000122509	0.000488525	HIC1
ENSG00000226124	1.05811	4.29853e-09	2.52566e-08	FTCDNL1
ENSG00000167131	-1.41967	5.72385e-14	4.4067e-13	CCDC103
ENSG00000109466	2.53615	1.14576e-66	3.08959e-65	KLHL2
ENSG00000273148	-0.958645	1.52188e-05	6.69479e-05	RP5-1068E13.7
ENSG00000108861	0.652904	9.73693e-60	2.36984e-58	DUSP3
ENSG00000205002	-1.76033	1.70201e-21	1.80478e-20	AARD
ENSG00000233327	0.593247	2.1596e-05	9.35982e-05	USP32P2
ENSG00000049860	1.35485	7.85772e-295	1.32962e-292	HEXB
ENSG00000140545	-1.29778	2.64349e-29	3.55216e-28	MFGE8
ENSG00000176749	-2.62755	1.34071e-106	6.00524e-105	CDK5R1
ENSG00000176595	0.669345	9.35993e-14	7.13734e-13	KBTBD11
ENSG00000182718	-0.716817	2.5413e-46	4.94664e-45	ANXA2
ENSG00000157600	-0.596488	3.14521e-45	5.96956e-44	TMEM164
ENSG00000176490	-3.30023	1.97216e-191	1.91707e-189	DIRAS1
ENSG00000176273	-0.920347	4.98804e-10	3.12116e-09	SLC35G1
ENSG00000176046	2.98787	5.74254e-206	6.18358e-204	NUPR1
ENSG00000175899	-1.45128	6.57864e-08	3.54194e-07	A2M
ENSG00000204140	-2.79896	5.37178e-13	3.94387e-12	CLPSL1
ENSG00000133424	-0.835401	5.05145e-95	1.98709e-93	LARGE
ENSG00000136436	1.32273	0	0	CALCOCO2
ENSG00000253051	-1.92381	1.19394e-06	5.80117e-06	SNORA31
ENSG00000175556	-1.94888	1.16621e-07	6.14845e-07	LONRF3
ENSG00000175471	2.09285	3.71459e-63	9.48851e-62	MCTP1
ENSG00000176406	-0.654386	5.2684e-38	8.71193e-37	RIMS2
ENSG00000175198	0.671761	2.82548e-26	3.48618e-25	PCCA
ENSG00000182013	-0.921786	1.9629e-101	8.28173e-100	PNMAL1
ENSG00000175175	-1.91024	8.40208e-32	1.21094e-30	PPM1E
ENSG00000203805	-2.30986	4.17891e-09	2.45808e-08	PLPP4
ENSG00000264696	1.69188	2.35158e-05	0.000101561	AC108078.1
ENSG00000273419	0.926618	2.64022e-08	1.46796e-07	RP4-751H13.7
ENSG00000174500	-4.0156	7.41211e-31	1.04196e-29	GCSAM
ENSG00000174384	0.688538	3.39438e-06	1.58614e-05	RP11-313P13.4
ENSG00000132356	-0.59999	1.5952e-46	3.11074e-45	PRKAA1
ENSG00000177731	0.594252	9.25211e-52	1.98718e-50	FLII
ENSG00000101695	0.810222	1.42585e-16	1.24217e-15	RNF125
ENSG00000063015	-2.91245	4.66258e-42	8.35372e-41	SEZ6
ENSG00000112306	0.768523	2.21969e-100	9.3038e-99	RPS12
ENSG00000169599	1.04309	4.62989e-68	1.27426e-66	NFU1
ENSG00000108639	1.01745	8.51303e-144	5.54491e-142	SYNGR2
ENSG00000255398	1.12759	5.51036e-05	0.000229022	HCAR3
ENSG00000173890	0.951361	3.03089e-132	1.80505e-130	GPR160
ENSG00000173868	1.98482	5.47821e-14	4.22267e-13	PHOSPHO1
ENSG00000132692	-1.55982	0.000115889	0.000463051	BCAN
ENSG00000002933	0.886914	1.90045e-40	3.296e-39	TMEM176A
ENSG00000173641	2.57703	1.06175e-22	1.17292e-21	HSPB7
ENSG00000173511	-0.631789	2.05968e-06	9.80945e-06	VEGFB
ENSG00000173457	0.647658	2.29292e-29	3.08758e-28	PPP1R14B
ENSG00000243350	-1.11709	8.22294e-14	6.28983e-13	RP11-379F12.3
ENSG00000173088	1.35073	5.19369e-10	3.24476e-09	C10orf131
ENSG00000225953	-2.50944	8.61121e-14	6.5821e-13	SATB2-AS1
ENSG00000172935	-1.91342	1.81695e-38	3.03435e-37	MRGPRF
ENSG00000172927	1.42055	6.75423e-10	4.19839e-09	MYEOV
ENSG00000172731	-0.750504	9.97655e-14	7.59848e-13	LRRC20
ENSG00000152217	-2.73806	1.08457e-233	1.37098e-231	SETBP1
ENSG00000172663	0.637487	6.59556e-31	9.30038e-30	TMEM134
ENSG00000172551	1.87822	2.91509e-44	5.43601e-43	MUCL1
ENSG00000104419	-2.84847	6.18219e-49	1.26658e-47	NDRG1
ENSG00000163281	0.661217	6.48078e-12	4.49592e-11	GNPDA2
ENSG00000177868	-1.1051	9.34539e-39	1.57055e-37	SVBP
ENSG00000165644	1.45243	3.43061e-71	9.80467e-70	COMTD1
ENSG00000172269	0.706422	1.88307e-19	1.85357e-18	DPAGT1
ENSG00000172232	-1.46818	1.0569e-07	5.59523e-07	AZU1
ENSG00000176884	-1.41923	9.82189e-27	1.22893e-25	GRIN1
ENSG00000105993	-0.592909	9.46145e-47	1.85181e-45	DNAJB6
ENSG00000172197	-1.05727	5.55743e-49	1.14077e-47	MBOAT1
ENSG00000171914	-0.60531	1.25446e-71	3.60457e-70	TLN2
ENSG00000171877	-1.1232	8.19778e-13	5.95307e-12	FRMD5
ENSG00000163939	-0.66204	1.42229e-50	3.00834e-49	PBRM1
ENSG00000171735	-0.875596	3.51418e-49	7.25078e-48	CAMTA1
ENSG00000171700	-0.66219	9.33873e-11	6.09141e-10	RGS19
ENSG00000171617	-1.19399	2.19086e-117	1.10514e-115	ENC1
ENSG00000271911	-1.62357	1.32324e-09	8.0515e-09	RP11-532F6.5
ENSG00000140450	0.853971	2.72982e-21	2.87179e-20	ARRDC4
ENSG00000171522	-1.00877	4.28062e-15	3.49498e-14	PTGER4
ENSG00000171503	1.36704	4.32101e-93	1.65895e-91	ETFDH
ENSG00000171488	-2.75513	3.09554e-60	7.58608e-59	LRRC8C
ENSG00000171451	-0.959031	3.57634e-77	1.12685e-75	DSEL
ENSG00000171448	-0.656619	4.40892e-17	3.93749e-16	ZBTB26
ENSG00000140396	0.630087	9.49568e-110	4.43331e-108	NCOA2
ENSG00000171345	0.586451	1.38903e-74	4.17114e-73	KRT19
ENSG00000205542	-6.80041	0	0	TMSB4X
ENSG00000139144	-3.23363	7.25473e-45	1.36881e-43	PIK3C2G
ENSG00000168539	2.13105	4.75177e-32	6.88253e-31	CHRM1
ENSG00000171119	-0.746928	0.000138569	0.000549074	NRTN
ENSG00000171084	0.61475	2.1981e-05	9.51637e-05	FAM86JP
ENSG00000171017	0.62041	6.47545e-19	6.25087e-18	LRRC8E
ENSG00000101144	-1.69936	1.88882e-89	6.99149e-88	BMP7
ENSG00000170893	2.05404	1.8183e-08	1.02613e-07	TRH
ENSG00000170791	2.55062	5.1669e-176	4.51483e-174	CHCHD7
ENSG00000176225	0.631268	2.31215e-48	4.68896e-47	RTTN
ENSG00000011258	-0.636366	8.26614e-26	1.0067e-24	MBTD1
ENSG00000182600	-2.00117	4.22272e-21	4.42631e-20	C2orf82
ENSG00000170745	1.33033	1.11066e-127	6.26457e-126	KCNS3
ENSG00000170629	-1.42866	4.20998e-62	1.06099e-60	DPY19L2P2
ENSG00000170624	-2.49188	5.20689e-10	3.25237e-09	SGCD
ENSG00000271880	1.71737	5.53616e-32	8.00416e-31	AGAP11
ENSG00000170558	-2.91254	0	0	CDH2
ENSG00000179528	1.33916	6.40104e-17	5.67068e-16	LBX2
ENSG00000170421	0.78373	1.54988e-107	7.02079e-106	KRT8
ENSG00000170390	-2.31092	6.86476e-11	4.50897e-10	DCLK2
ENSG00000004777	-0.596968	1.50605e-12	1.07703e-11	ARHGAP33
ENSG00000170271	-1.3052	1.52373e-10	9.83461e-10	FAXDC2
ENSG00000104611	1.36388	7.73534e-08	4.14081e-07	SH2D4A
ENSG00000178821	-0.810048	1.54765e-05	6.8035e-05	TMEM52
ENSG00000207137	2.4535	6.00643e-11	3.95902e-10	SNORD116-13
ENSG00000048471	0.779703	2.79043e-33	4.17598e-32	SNX29
ENSG00000177679	-4.64756	1.09367e-72	3.1913e-71	SRRM3
ENSG00000178796	-1.32473	8.90205e-05	0.000361519	RIIAD1
ENSG00000171714	1.3459	1.57595e-206	1.70849e-204	ANO5
ENSG00000170099	3.69549	9.64293e-37	1.55753e-35	SERPINA6
ENSG00000170011	-1.13159	1.35374e-39	2.31642e-38	MYRIP
ENSG00000169964	0.652475	6.51463e-14	5.00467e-13	TMEM42
ENSG00000130035	-1.18404	7.93815e-08	4.24745e-07	GALNT8
ENSG00000169918	-0.971029	1.78908e-09	1.08017e-08	OTUD7A
ENSG00000169783	-2.02185	4.10475e-85	1.46022e-83	LINGO1
ENSG00000160460	-2.20138	5.8882e-83	2.03579e-81	SPTBN4
ENSG00000169738	0.815502	2.92281e-44	5.44722e-43	DCXR
ENSG00000240322	0.724347	0.000169019	0.000663565	RN7SL481P
ENSG00000169621	0.611692	2.86078e-16	2.45943e-15	APLF
ENSG00000260804	-1.55799	2.58021e-90	9.62867e-89	PKI55
ENSG00000170873	2.699	0	0	MTSS1
ENSG00000169418	1.96473	2.16649e-09	1.29993e-08	NPR1
ENSG00000169403	2.06801	6.99332e-43	1.27652e-41	PTAFR
ENSG00000182489	0.933061	2.47894e-07	1.27499e-06	XKRX
ENSG00000111252	-0.832647	4.37596e-17	3.90915e-16	SH2B3
ENSG00000169193	1.17038	5.91029e-20	5.93087e-19	CCDC126
ENSG00000169026	1.06242	2.48604e-10	1.58221e-09	MFSD7
ENSG00000168913	-1.67644	1.26269e-86	4.56294e-85	ENHO
ENSG00000106299	0.7135	1.58455e-60	3.90412e-59	WASL
ENSG00000180354	-0.681543	6.58563e-98	2.67618e-96	MTURN
ENSG00000196562	-3.48217	0	0	SULF2
ENSG00000168487	-1.99199	6.34009e-32	9.16233e-31	BMP1
ENSG00000179593	1.55176	6.75967e-05	0.000278154	ALOX15B
ENSG00000168461	-1.11398	0.000252331	0.000968531	RAB31
ENSG00000168447	-1.7467	6.13481e-11	4.04031e-10	SCNN1B
ENSG00000251322	-1.28613	5.95296e-20	5.96995e-19	SHANK3
ENSG00000168421	-0.883962	3.66012e-16	3.13231e-15	RHOH
ENSG00000168283	-2.93062	0	0	BMI1
ENSG00000178038	1.83103	9.05157e-50	1.88708e-48	ALS2CL
ENSG00000159712	1.91584	5.49828e-20	5.5261e-19	ANKRD18CP
ENSG00000136770	-1.25676	0	0	DNAJC1
ENSG00000130477	-1.74683	4.77214e-259	6.8133e-257	UNC13A
ENSG00000130038	1.92658	2.01574e-28	2.63986e-27	CRACR2A
ENSG00000174808	0.874921	0.000169999	0.000667167	BTC
ENSG00000168003	0.73339	1.122e-138	7.02208e-137	SLC3A2
ENSG00000168000	0.928264	2.04891e-83	7.11469e-82	BSCL2
ENSG00000169330	1.02731	1.1036e-17	1.00927e-16	KIAA1024
ENSG00000268362	0.597473	1.80653e-07	9.38359e-07	CTD-2017D11.1
ENSG00000177103	-3.29741	3.86053e-21	4.05198e-20	DSCAML1
ENSG00000167800	-1.33352	5.33123e-05	0.000221916	TBX10
ENSG00000167778	0.845261	3.35471e-38	5.57625e-37	SPRYD3
ENSG00000167769	2.08556	1.07993e-57	2.5602e-56	ACER1
ENSG00000226416	1.24266	2.02678e-06	9.65853e-06	MRPL23-AS1
ENSG00000186007	-1.66307	3.7191e-05	0.000157329	LEMD1
ENSG00000167740	-0.883509	8.22077e-17	7.25264e-16	CYB5D2
ENSG00000265813	0.840007	9.73461e-08	5.16804e-07	RN7SL300P
ENSG00000005379	-0.786377	3.35915e-82	1.1453e-80	BZRAP1
ENSG00000167700	0.766503	1.365e-23	1.54966e-22	MFSD3
ENSG00000177606	-0.836874	6.96538e-36	1.10223e-34	JUN
ENSG00000167676	-0.804473	7.55714e-05	0.0003092	PLIN4
ENSG00000167653	1.6909	2.35065e-13	1.75933e-12	PSCA
ENSG00000169862	-0.798521	2.13638e-38	3.56594e-37	CTNND2
ENSG00000167617	1.68383	1.49354e-09	9.05327e-09	CDC42EP5
ENSG00000078018	-5.70173	9.29901e-113	4.47879e-111	MAP2
ENSG00000162366	4.07341	7.35272e-53	1.59856e-51	PDZK1IP1
ENSG00000134531	2.50484	3.78952e-37	6.16443e-36	EMP1
ENSG00000236283	2.31008	1.22724e-12	8.8258e-12	AC013463.2
ENSG00000185442	0.679822	1.74387e-50	3.68611e-49	FAM174B
ENSG00000173914	-0.986666	5.01292e-35	7.77866e-34	RBM4B
ENSG00000167123	0.940259	1.29841e-53	2.84804e-52	CERCAM
ENSG00000075426	1.0179	7.32541e-105	3.20484e-103	FOSL2
ENSG00000167105	2.56846	3.33397e-21	3.5016e-20	TMEM92
ENSG00000106689	-2.84485	2.59187e-25	3.10219e-24	LHX2
ENSG00000177076	-0.915307	4.15873e-17	3.72029e-16	ACER2
ENSG00000167081	-0.834209	7.01261e-24	8.05568e-23	PBX3
ENSG00000167037	1.81189	2.95554e-39	5.03308e-38	SGSM1
ENSG00000243137	2.09926	9.29382e-08	4.93894e-07	PSG4
ENSG00000167186	-0.686152	1.27662e-28	1.68361e-27	COQ7
ENSG00000167004	0.590113	7.081e-120	3.68823e-118	PDIA3
ENSG00000088808	1.01755	1.91067e-56	4.43756e-55	PPP1R13B
ENSG00000166961	-4.64792	3.25289e-44	6.05533e-43	MS4A15
ENSG00000166902	0.657373	1.14226e-36	1.841e-35	MRPL16
ENSG00000166828	-1.56012	3.37379e-08	1.85869e-07	SCNN1G
ENSG00000131236	0.591127	1.00849e-96	4.03659e-95	CAP1
ENSG00000166821	1.27667	1.66e-79	5.46177e-78	PEX11A
ENSG00000108797	-1.79694	3.79339e-70	1.06887e-68	CNTNAP1
ENSG00000101605	-1.36595	3.59408e-13	2.66564e-12	MYOM1
ENSG00000087253	1.76353	5.65831e-72	1.6406e-70	LPCAT2
ENSG00000152229	-0.674467	1.03351e-31	1.48485e-30	PSTPIP2
ENSG00000172345	-1.78196	3.23657e-37	5.2703e-36	STARD5
ENSG00000243649	0.776006	1.00725e-24	1.18517e-23	CFB
ENSG00000166557	0.953139	5.97969e-149	4.11261e-147	TMED3
ENSG00000166479	-0.694798	1.50034e-54	3.35306e-53	TMX3
ENSG00000166471	0.674791	1.83785e-28	2.41183e-27	TMEM41B
ENSG00000166450	-2.55953	3.15602e-20	3.20218e-19	PRTG
ENSG00000092850	-1.11688	6.08845e-15	4.9245e-14	TEKT2
ENSG00000166402	-4.33368	8.07443e-155	5.81595e-153	TUB
ENSG00000024526	-0.596722	5.2495e-33	7.79407e-32	DEPDC1
ENSG00000166206	-4.16418	1.87288e-164	1.47166e-162	GABRB3
ENSG00000166147	-0.858625	2.93513e-09	1.74541e-08	FBN1
ENSG00000166130	0.779993	1.09123e-35	1.72083e-34	IKBIP
ENSG00000183760	-0.731189	5.15879e-06	2.37079e-05	PAPL
ENSG00000249550	2.0021	1.36575e-32	2.00542e-31	LINC01234
ENSG00000165895	1.13531	1.55169e-05	6.82031e-05	ARHGAP42
ENSG00000168496	-0.672491	9.98892e-98	4.04374e-96	FEN1
ENSG00000165863	-1.26234	3.55547e-100	1.4825e-98	C10orf82
ENSG00000155324	1.06245	1.01461e-32	1.49601e-31	GRAMD3
ENSG00000160360	-1.4705	1.0276e-126	5.73539e-125	GPSM1
ENSG00000112699	0.706153	3.90717e-18	3.65259e-17	GMDS
ENSG00000165512	0.829087	1.45837e-44	2.7371e-43	ZNF22
ENSG00000165507	-1.755	8.31882e-14	6.36013e-13	C10orf10
ENSG00000165449	0.76744	3.51959e-05	0.000149224	SLC16A9
ENSG00000165443	-3.71409	1.31377e-21	1.39865e-20	PHYHIPL
ENSG00000165434	-2.33144	0	0	PGM2L1
ENSG00000168491	1.43382	4.49967e-18	4.19667e-17	CCDC110
ENSG00000165275	-0.750054	1.88686e-45	3.61124e-44	TRMT10B
ENSG00000165238	-1.73249	1.15949e-21	1.23812e-20	WNK2
ENSG00000172318	1.54322	5.36464e-25	6.35903e-24	B3GALT1
ENSG00000170522	0.873258	4.35863e-65	1.15392e-63	ELOVL6
ENSG00000180447	-1.91755	6.33944e-07	3.16043e-06	GAS1
ENSG00000165164	-1.50628	4.49727e-05	0.000188824	CFAP47
ENSG00000164989	-0.620078	3.84299e-16	3.28442e-15	CCDC171
ENSG00000164951	0.680953	7.05645e-61	1.74399e-59	PDP1
ENSG00000164938	-2.76364	7.59725e-67	2.05209e-65	TP53INP1
ENSG00000105639	1.0711	1.9309e-06	9.22183e-06	JAK3
ENSG00000179331	-2.53992	8.63772e-75	2.60361e-73	RAB39A
ENSG00000237732	-1.63791	2.09607e-08	1.1748e-07	AC010980.2
ENSG00000164591	-1.39702	1.1126e-08	6.37099e-08	MYOZ3
ENSG00000164574	0.999448	1.6249e-123	8.85279e-122	GALNT10
ENSG00000166866	-1.44596	7.45617e-06	3.3704e-05	MYO1A
ENSG00000166228	1.06807	9.16064e-101	3.85482e-99	PCBD1
ENSG00000164318	3.51433	2.37687e-66	6.37706e-65	EGFLAM
ENSG00000201583	1.00845	7.21978e-08	3.87214e-07	RN7SKP191
ENSG00000101460	0.587994	9.00251e-10	5.54098e-09	MAP1LC3A
ENSG00000164414	0.995767	7.59185e-128	4.29726e-126	SLC35A1
ENSG00000164236	-1.75579	2.57348e-19	2.51152e-18	ANKRD33B
ENSG00000196517	0.821301	9.08291e-23	1.00617e-21	SLC6A9
ENSG00000115652	1.27412	2.48677e-41	4.38179e-40	UXS1
ENSG00000164125	5.1315	4.35873e-67	1.18033e-65	FAM198B
ENSG00000164078	-1.93085	2.85449e-17	2.56791e-16	MST1R
ENSG00000164076	-2.05302	2.94614e-07	1.50608e-06	CAMKV
ENSG00000135116	1.17586	1.65904e-19	1.63657e-18	HRK
ENSG00000163931	0.769594	3.14987e-78	1.01548e-76	TKT
ENSG00000227646	1.78893	2.16015e-06	1.02696e-05	STEAP2-AS1
ENSG00000163898	3.1718	0	0	LIPH
ENSG00000163814	-0.686661	1.17975e-47	2.35664e-46	CDCP1
ENSG00000170775	-0.892902	2.14919e-28	2.81118e-27	GPR37
ENSG00000153157	-1.20182	7.96274e-05	0.000325149	SYCP2L
ENSG00000188112	1.8615	1.17735e-78	3.83429e-77	C6orf132
ENSG00000241361	-0.697097	6.27621e-16	5.31707e-15	SLC25A24P1
ENSG00000174804	-0.789069	2.33272e-75	7.07806e-74	FZD4
ENSG00000163697	-1.2376	2.07945e-219	2.47223e-217	APBB2
ENSG00000163694	0.74538	1.64542e-129	9.4986e-128	RBM47
ENSG00000126821	-0.664345	1.25685e-13	9.50915e-13	SGPP1
ENSG00000163683	0.748175	1.89237e-128	1.07687e-126	SMIM14
ENSG00000104140	1.7131	7.08467e-79	2.31435e-77	RHOV
ENSG00000187231	-0.806725	2.01115e-62	5.08849e-61	SESTD1
ENSG00000163623	-3.49015	1.10087e-106	4.93786e-105	NKX6-1
ENSG00000126262	1.33558	1.61427e-176	1.4222e-174	FFAR2
ENSG00000163596	-0.655609	1.16456e-17	1.06411e-16	ICA1L
ENSG00000272913	-2.02975	8.14598e-34	1.23292e-32	RP11-440D17.3
ENSG00000163864	-0.91498	1.24594e-79	4.10364e-78	NMNAT3
ENSG00000067057	2.84351	7.8105e-100	3.23979e-98	PFKP
ENSG00000163435	0.758728	5.96155e-35	9.22829e-34	ELF3
ENSG00000143013	-1.89619	1.13696e-216	1.33191e-214	LMO4
ENSG00000197140	0.75975	2.02327e-29	2.72907e-28	ADAM32
ENSG00000196476	-0.603974	8.60781e-07	4.23843e-06	C20orf96
ENSG00000175920	-2.91144	2.96098e-100	1.23623e-98	DOK7
ENSG00000165186	-1.08148	3.15024e-06	1.47594e-05	PTCHD1
ENSG00000163347	-2.22847	2.67346e-08	1.48515e-07	CLDN1
ENSG00000163257	-0.780803	9.66445e-92	3.6405e-90	DCAF16
ENSG00000163235	-1.52053	9.70169e-60	2.36306e-58	TGFA
ENSG00000257702	1.24068	1.6539e-13	1.24601e-12	LBX2-AS1
ENSG00000163220	1.72183	9.0533e-10	5.5701e-09	S100A9
ENSG00000163171	-1.41091	9.12743e-46	1.75952e-44	CDC42EP3
ENSG00000085552	-1.87248	9.17609e-138	5.72048e-136	IGSF9
ENSG00000203635	0.891277	8.06352e-07	3.98393e-06	AC144450.2
ENSG00000163141	0.75413	3.8177e-08	2.09316e-07	BNIPL
ENSG00000174238	-0.73352	1.88968e-20	1.93326e-19	PITPNA
ENSG00000186510	3.11326	2.46863e-50	5.19403e-49	CLCNKA
ENSG00000166006	-6.25119	9.593e-227	1.16652e-224	KCNC2
ENSG00000158427	-1.89695	3.72822e-13	2.76e-12	TMSB15B
ENSG00000166816	0.911718	7.39646e-09	4.26594e-08	LDHD
ENSG00000162894	-2.67495	2.32439e-13	1.74049e-12	FCMR
ENSG00000162892	-1.85751	7.59601e-07	3.76516e-06	IL24
ENSG00000135824	1.91474	2.31704e-09	1.38766e-08	RGS8
ENSG00000102265	-5.18681	7.66189e-103	3.26278e-101	TIMP1
ENSG00000162782	-4.11653	1.8932e-33	2.84389e-32	TDRD5
ENSG00000151025	-6.02676	3.51215e-175	3.01941e-173	GPR158
ENSG00000162745	-4.17393	3.09657e-90	1.15421e-88	OLFML2B
ENSG00000188659	-0.629448	3.39108e-05	0.000144024	SAXO2
ENSG00000178409	0.991082	6.53103e-89	2.39803e-87	BEND3
ENSG00000124429	-3.3166	4.06112e-110	1.90438e-108	POF1B
ENSG00000157693	0.599221	2.73373e-29	3.67187e-28	C9orf91
ENSG00000184160	-2.27659	6.62921e-126	3.66164e-124	ADRA2C
ENSG00000177628	0.706097	3.59684e-45	6.81058e-44	GBA
ENSG00000170525	-1.04993	6.48715e-26	7.94278e-25	PFKFB3
ENSG00000162434	-0.981105	1.86561e-280	2.93911e-278	JAK1
ENSG00000162733	0.883433	1.05833e-07	5.60185e-07	DDR2
ENSG00000273036	1.88588	8.90911e-07	4.38005e-06	FAM95C
ENSG00000167680	-4.00197	1.00505e-92	3.84482e-91	SEMA6B
ENSG00000160963	-3.41074	1.70555e-28	2.24005e-27	COL26A1
ENSG00000161682	-1.67473	3.52576e-54	7.83581e-53	FAM171A2
ENSG00000161647	-0.891826	2.7324e-42	4.92309e-41	MPP3
ENSG00000261888	-1.42477	3.2981e-07	1.67689e-06	AC144831.1
ENSG00000161328	-0.631937	7.7923e-12	5.37892e-11	LRRC56
ENSG00000261538	1.60451	4.55262e-08	2.48163e-07	RP11-3M1.1
ENSG00000161016	0.915539	2.37071e-119	1.22682e-117	RPL8
ENSG00000121900	-0.736158	6.13895e-38	1.01462e-36	TMEM54
ENSG00000082397	1.89209	5.9476e-89	2.18632e-87	EPB41L3
ENSG00000160867	1.0288	3.88261e-162	2.97057e-160	FGFR4
ENSG00000160862	8.18809	0	0	AZGP1
ENSG00000162599	2.37061	2.65193e-149	1.83972e-147	NFIA
ENSG00000160746	1.02348	5.35763e-95	2.10494e-93	ANO10
ENSG00000149115	1.2993	2.68425e-237	3.46149e-235	TNKS1BP1
ENSG00000160716	-1.95092	1.39171e-183	1.27531e-181	CHRNB2
ENSG00000109689	-0.675366	1.30979e-26	1.63371e-25	STIM2
ENSG00000160678	1.69961	2.84889e-18	2.68208e-17	S100A1
ENSG00000160584	-1.16984	1.63583e-41	2.89356e-40	SIK3
ENSG00000158089	-1.45162	8.09456e-140	5.11605e-138	GALNT14
ENSG00000260766	-0.753053	1.40543e-06	6.79166e-06	RP11-226L15.5
ENSG00000164403	-1.40313	1.46579e-28	1.92832e-27	SHROOM1
ENSG00000230695	-2.19782	4.85686e-08	2.64162e-07	AC012462.1
ENSG00000157110	0.844054	6.62341e-10	4.11867e-09	RBPMS
ENSG00000160321	0.937968	4.31448e-34	6.5768e-33	ZNF208
ENSG00000166833	-0.92223	4.51549e-17	4.03081e-16	NAV2
ENSG00000003137	-0.63095	6.59419e-12	4.57162e-11	CYP26B1
ENSG00000167799	-0.889105	4.57068e-24	5.2828e-23	NUDT8
ENSG00000214216	-1.56984	0.000108718	0.000435429	IQCJ
ENSG00000160180	4.41103	0	0	TFF3
ENSG00000186951	-1.7354	6.38126e-159	4.79059e-157	PPARA
ENSG00000117480	-0.586477	1.29985e-41	2.30819e-40	FAAH
ENSG00000159784	-3.23894	1.3132e-17	1.19685e-16	FAM131B
ENSG00000159409	-3.01029	1.7506e-78	5.67235e-77	CELF3
ENSG00000132561	0.721268	2.76675e-48	5.60022e-47	MATN2
ENSG00000008323	0.816446	3.40133e-13	2.52619e-12	PLEKHG6
ENSG00000177614	-3.29457	5.37341e-99	2.20599e-97	PGBD5
ENSG00000205181	-0.815194	3.38527e-06	1.58235e-05	LINC00654
ENSG00000159200	2.2463	0	0	RCAN1
ENSG00000159167	-2.9491	1.10632e-135	6.79102e-134	STC1
ENSG00000158859	-0.706159	9.21227e-08	4.89805e-07	ADAMTS4
ENSG00000166128	1.41052	1.1325e-45	2.1792e-44	RAB8B
ENSG00000158715	-1.46004	1.61216e-08	9.12701e-08	SLC45A3
ENSG00000145014	-0.750292	6.29938e-19	6.08275e-18	TMEM44
ENSG00000052344	0.898382	6.32753e-74	1.87893e-72	PRSS8
ENSG00000075223	1.08305	1.28338e-185	1.19313e-183	SEMA3C
ENSG00000161921	-1.09236	1.15133e-10	7.47022e-10	CXCL16
ENSG00000256304	1.20814	2.43178e-22	2.65701e-21	CCDC150P1
ENSG00000182492	-1.14073	0.000170111	0.000667522	BGN
ENSG00000158296	1.12496	5.29045e-08	2.87013e-07	SLC13A3
ENSG00000100206	-0.817929	1.02811e-07	5.44911e-07	DMC1
ENSG00000158220	-0.793408	1.91968e-05	8.36535e-05	ESYT3
ENSG00000158050	-3.68203	3.97443e-157	2.92871e-155	DUSP2
ENSG00000168546	-2.46646	2.85797e-31	4.06405e-30	GFRA2
ENSG00000157927	-1.95265	1.06494e-43	1.97323e-42	RADIL
ENSG00000169499	-0.707051	7.16735e-75	2.16244e-73	PLEKHA2
ENSG00000109472	2.73572	3.98471e-307	7.32384e-305	CPE
ENSG00000249430	-3.39454	1.50434e-17	1.36754e-16	CTD-2231H16.1
ENSG00000157617	-1.65414	8.12279e-07	4.01197e-06	C2CD2
ENSG00000157542	-2.10472	4.2616e-113	2.05566e-111	KCNJ6
ENSG00000180329	-0.996122	7.11866e-103	3.03549e-101	CCDC43
ENSG00000116260	0.961661	1.83561e-109	8.54508e-108	QSOX1
ENSG00000158286	-0.688525	6.67436e-06	3.03071e-05	RNF207
ENSG00000157483	1.21008	4.97462e-158	3.69985e-156	MYO1E
ENSG00000163794	1.10814	2.42496e-07	1.24763e-06	UCN
ENSG00000175197	0.699295	6.74151e-18	6.23303e-17	DDIT3
ENSG00000157216	-0.585158	3.84752e-13	2.84372e-12	SSBP3
ENSG00000244701	0.715341	6.39804e-06	2.91144e-05	RP5-894A10.2
ENSG00000125089	1.30258	1.28441e-176	1.13472e-174	SH3TC1
ENSG00000156804	-1.0683	2.13176e-54	4.75092e-53	FBXO32
ENSG00000152127	-1.08603	2.45697e-179	2.19487e-177	MGAT5
ENSG00000156709	0.607919	2.34267e-26	2.89717e-25	AIFM1
ENSG00000105329	-2.67809	9.89165e-49	2.02137e-47	TGFB1
ENSG00000257767	1.43627	3.49213e-11	2.32865e-10	RP11-162P23.2
ENSG00000156535	-2.18338	3.46892e-83	1.20325e-81	CD109
ENSG00000261963	-1.79077	9.48253e-07	4.64981e-06	RP11-74E22.4
ENSG00000155961	-0.771619	7.70578e-31	1.08182e-29	RAB39B
ENSG00000156482	0.586217	2.33441e-71	6.6837e-70	RPL30
ENSG00000156453	-0.964285	1.04747e-92	4.0023e-91	PCDH1
ENSG00000218549	3.18473	9.95881e-26	1.211e-24	OR4K12P
ENSG00000156284	-0.766339	6.4338e-05	0.00026553	CLDN8
ENSG00000179388	-1.67542	1.08246e-22	1.19496e-21	EGR3
ENSG00000128011	-1.61871	8.14638e-15	6.54761e-14	LRFN1
ENSG00000156239	-0.585509	2.36732e-27	3.00434e-26	N6AMT1
ENSG00000156194	1.07238	3.67366e-05	0.000155489	PPEF2
ENSG00000156103	-6.42903	0	0	MMP16
ENSG00000156096	9.47164	0	0	UGT2B4
ENSG00000144893	-3.2178	1.30473e-100	5.48312e-99	MED12L
ENSG00000228184	1.87337	2.6112e-06	1.23187e-05	SNX19P1
ENSG00000155980	-0.607628	6.05585e-06	2.76083e-05	KIF5A
ENSG00000171365	0.721851	6.04707e-13	4.42543e-12	CLCN5
ENSG00000174928	0.786817	6.39949e-22	6.88172e-21	C3orf33
ENSG00000279453	0.597051	1.01489e-06	4.96286e-06	RP3-425C14.4
ENSG00000165424	-0.904423	5.05002e-10	3.15747e-09	ZCCHC24
ENSG00000151725	-0.814589	2.16017e-86	7.77976e-85	CENPU
ENSG00000168386	1.30346	1.5129e-09	9.16714e-09	FILIP1L
ENSG00000155158	1.30713	3.26983e-103	1.3999e-101	TTC39B
ENSG00000188493	0.636673	4.13556e-06	1.92014e-05	C19orf54
ENSG00000180667	-0.789239	9.84367e-35	1.52009e-33	YOD1
ENSG00000155093	-0.839685	3.09997e-78	1.00041e-76	PTPRN2
ENSG00000178462	2.78582	1.84345e-21	1.95281e-20	TUBAL3
ENSG00000143153	-1.02361	2.40458e-137	1.49322e-135	ATP1B1
ENSG00000181284	0.687785	8.75093e-07	4.30692e-06	TMEM102
ENSG00000266050	1.49076	8.01761e-07	3.96247e-06	RP11-822E23.6
ENSG00000157303	-1.09017	8.65871e-33	1.27846e-31	SUSD3
ENSG00000154537	1.20565	1.22255e-15	1.02319e-14	FAM27C
ENSG00000154447	-0.807462	2.92431e-85	1.04145e-83	SH3RF1
ENSG00000154319	-0.904957	3.77169e-20	3.80993e-19	FAM167A
ENSG00000070778	-1.51239	4.37828e-07	2.20437e-06	PTPN21
ENSG00000130768	-1.65745	4.02339e-100	1.67324e-98	SMPDL3B
ENSG00000154153	0.644144	8.21647e-29	1.08898e-27	FAM134B
ENSG00000171444	-2.08872	0	0	MCC
ENSG00000154040	-1.89094	3.79893e-45	7.18897e-44	CABYR
ENSG00000279427	2.60323	2.02297e-19	1.98578e-18	RP11-132F7.2
ENSG00000153956	1.27834	1.25071e-10	8.10679e-10	CACNA2D1
ENSG00000153832	0.779674	1.13473e-10	7.364e-10	FBXO36
ENSG00000074211	-0.720816	7.16287e-40	1.23093e-38	PPP2R2C
ENSG00000153714	0.695899	2.30006e-58	5.48942e-57	LURAP1L
ENSG00000124467	1.82875	3.93944e-06	1.83174e-05	PSG8
ENSG00000104432	0.733808	4.57682e-09	2.68325e-08	IL7
ENSG00000153132	2.89495	5.80548e-120	3.02879e-118	CLGN
ENSG00000185052	-3.63287	4.85226e-233	6.10945e-231	SLC24A3
ENSG00000153094	-1.2684	4.66858e-91	1.75036e-89	BCL2L11
ENSG00000153066	0.705839	6.27158e-28	8.1039e-27	TXNDC11
ENSG00000152954	-3.5117	3.84084e-23	4.30392e-22	NRSN1
ENSG00000152953	-0.871901	1.7837e-154	1.27616e-152	STK32B
ENSG00000116001	-0.624949	2.84586e-44	5.31e-43	TIA1
ENSG00000268100	2.23926	2.67195e-16	2.30142e-15	ZNF725P
ENSG00000152642	0.595269	1.49123e-45	2.85745e-44	GPD1L
ENSG00000152492	-3.88505	5.85452e-95	2.29734e-93	CCDC50
ENSG00000276796	0.87415	0.000252716	0.000969193	FP236383.8
ENSG00000149328	3.2032	6.21461e-166	4.98119e-164	GLB1L2
ENSG00000152413	1.18333	1.10412e-66	2.97981e-65	HOMER1
ENSG00000152377	-4.31162	1.29266e-55	2.94659e-54	SPOCK1
ENSG00000165731	-0.678336	6.4708e-51	1.37349e-49	RET
ENSG00000152253	-0.630555	1.92073e-34	2.94755e-33	SPC25
ENSG00000141469	0.732597	1.71035e-11	1.15813e-10	SLC14A1
ENSG00000197565	-1.46638	3.84362e-14	2.98646e-13	COL4A6
ENSG00000168301	-1.35828	5.0997e-98	2.07498e-96	KCTD6
ENSG00000151835	0.653516	1.87134e-08	1.05439e-07	SACS
ENSG00000151790	2.62445	8.35086e-20	8.34069e-19	TDO2
ENSG00000151746	-1.02453	7.17833e-15	5.78554e-14	BICD1
ENSG00000136574	-2.338	3.78013e-31	5.36345e-30	GATA4
ENSG00000165288	-6.22584	0	0	BRWD3
ENSG00000151640	-2.68609	5.69117e-108	2.58904e-106	DPYSL4
ENSG00000151575	-0.696588	1.5481e-21	1.64321e-20	TEX9
ENSG00000151552	-1.04261	2.25601e-27	2.86649e-26	QDPR
ENSG00000158985	0.634519	1.83606e-58	4.39186e-57	CDC42SE2
ENSG00000127483	-0.729064	3.31356e-168	2.68962e-166	HP1BP3
ENSG00000151388	-2.01416	3.53235e-25	4.21051e-24	ADAMTS12
ENSG00000151365	-0.698272	0.000140399	0.000555842	THRSP
ENSG00000169129	-2.75056	2.6665e-146	1.78404e-144	AFAP1L2
ENSG00000175785	-2.14421	1.41634e-08	8.04259e-08	PRIMA1
ENSG00000218357	1.80024	7.27976e-08	3.90235e-07	LL22NC03-75H12.2
ENSG00000151117	1.16997	4.0083e-79	1.31207e-77	TMEM86A
ENSG00000151033	1.62042	1.82058e-05	7.94543e-05	LYZL2
ENSG00000150995	0.84091	2.35008e-84	8.26821e-83	ITPR1
ENSG00000150961	0.838318	2.03532e-50	4.29363e-49	SEC24D
ENSG00000150938	-1.23306	1.19595e-159	8.99943e-158	CRIM1
ENSG00000150907	0.593457	6.11511e-06	2.78666e-05	FOXO1
ENSG00000276644	1.29251	6.88532e-37	1.11663e-35	DACH1
ENSG00000150712	0.728619	4.40063e-47	8.68744e-46	MTMR12
ENSG00000150687	2.69486	0	0	PRSS23
ENSG00000013588	-1.65961	4.47404e-98	1.82273e-96	GPRC5A
ENSG00000150526	2.9852	8.45777e-62	2.12481e-60	MIA2
ENSG00000133065	-0.610723	1.05765e-16	9.27978e-16	SLC41A1
ENSG00000150281	-1.10765	2.3007e-06	1.09038e-05	CTF1
ENSG00000131238	1.03514	1.20517e-248	1.61944e-246	PPT1
ENSG00000101890	1.65821	8.73261e-10	5.38522e-09	GUCY2F
ENSG00000253729	-0.602897	4.4434e-38	7.35911e-37	PRKDC
ENSG00000163873	-2.87698	0	0	GRIK3
ENSG00000167889	-4.0104	2.17116e-64	5.659e-63	MGAT5B
ENSG00000196090	-2.31554	6.51492e-09	3.77384e-08	PTPRT
ENSG00000158008	-1.41184	1.46427e-49	3.04282e-48	EXTL1
ENSG00000197070	0.931388	7.44192e-95	2.91667e-93	ARRDC1
ENSG00000143344	-1.17404	2.00544e-05	8.72123e-05	RGL1
ENSG00000127824	2.65646	0	0	TUBA4A
ENSG00000065485	0.812671	2.65842e-18	2.50571e-17	PDIA5
ENSG00000109654	-1.11136	4.51824e-09	2.65085e-08	TRIM2
ENSG00000266094	-0.852469	3.04788e-07	1.55561e-06	RASSF5
ENSG00000149295	-4.15829	5.66085e-173	4.77677e-171	DRD2
ENSG00000149294	-1.96044	2.271e-95	8.94444e-94	NCAM1
ENSG00000274270	-0.770943	3.09465e-06	1.45127e-05	RP11-34F20.7
ENSG00000149260	-1.67923	3.11069e-120	1.62554e-118	CAPN5
ENSG00000149256	-3.57224	3.04145e-110	1.42832e-108	TENM4
ENSG00000149212	-3.81702	9.88868e-237	1.265e-234	SESN3
ENSG00000149150	-1.38207	7.1843e-23	7.98892e-22	SLC43A1
ENSG00000175497	-1.68807	1.73249e-83	6.02247e-82	DPP10
ENSG00000124299	-0.717272	6.48912e-32	9.37347e-31	PEPD
ENSG00000171722	-2.10811	2.46036e-08	1.37177e-07	C1orf111
ENSG00000174032	-0.644395	6.02856e-13	4.41289e-12	SLC25A30
ENSG00000148702	4.82227	0	0	HABP2
ENSG00000148671	2.19604	0	0	ADIRF
ENSG00000146205	1.30874	6.42086e-18	5.94343e-17	ANO7
ENSG00000148498	-1.09979	5.78503e-164	4.51247e-162	PARD3
ENSG00000148444	-1.07181	1.24098e-101	5.25665e-100	COMMD3
ENSG00000148429	0.833625	2.17177e-44	4.06171e-43	USP6NL
ENSG00000232400	2.96801	6.79016e-17	6.00875e-16	RAD17P1
ENSG00000123427	0.683622	6.23776e-10	3.88339e-09	METTL21B
ENSG00000148411	-0.759671	1.94839e-35	3.05749e-34	NACC2
ENSG00000110400	-0.703944	2.70357e-21	2.84604e-20	PVRL1
ENSG00000164211	2.41325	6.28251e-104	2.71515e-102	STARD4
ENSG00000179476	0.784645	1.06135e-09	6.48633e-09	C14orf28
ENSG00000148123	2.10489	5.02392e-22	5.42438e-21	PLPPR1
ENSG00000148057	1.01156	1.34789e-12	9.67608e-12	IDNK
ENSG00000148019	-0.589218	2.70287e-89	9.9931e-88	CEP78
ENSG00000147889	-0.690279	7.02243e-18	6.47964e-17	CDKN2A
ENSG00000147872	-1.20728	6.96997e-20	6.98329e-19	PLIN2
ENSG00000141622	-2.53197	7.45331e-81	2.48815e-79	RNF165
ENSG00000007174	-2.06888	1.00299e-14	8.01515e-14	DNAH9
ENSG00000104412	0.716638	3.47613e-49	7.1769e-48	EMC2
ENSG00000147654	0.816345	8.04615e-43	1.4654e-41	EBAG9
ENSG00000147576	0.626821	3.79289e-06	1.76668e-05	ADHFE1
ENSG00000120137	-0.602753	8.29229e-139	5.21013e-137	PANK3
ENSG00000147535	1.01064	0	0	PLPP5
ENSG00000113558	-0.70301	8.981e-158	6.64864e-156	SKP1
ENSG00000141449	-0.940356	2.67339e-23	3.01154e-22	GREB1L
ENSG00000143369	1.19337	2.64465e-07	1.35651e-06	ECM1
ENSG00000152270	1.12961	3.03908e-116	1.51391e-114	PDE3B
ENSG00000147403	0.623321	6.18397e-59	1.49035e-57	RPL10
ENSG00000147394	-1.73965	1.95482e-53	4.27905e-52	ZNF185
ENSG00000258929	1.02958	5.32223e-06	2.44099e-05	NA
ENSG00000173567	3.59005	2.74643e-149	1.89706e-147	ADGRF3
ENSG00000147234	-2.67248	6.02981e-25	7.13163e-24	FRMPD3
ENSG00000147224	-0.667416	1.35432e-27	1.73181e-26	PRPS1
ENSG00000147180	-4.25016	1.60892e-244	2.14395e-242	ZNF711
ENSG00000147100	-2.8199	0	0	SLC16A2
ENSG00000140403	-0.995638	4.52959e-86	1.624e-84	DNAJA4
ENSG00000147027	-1.77157	1.24291e-43	2.29765e-42	TMEM47
ENSG00000055163	-0.77617	9.21071e-25	1.08576e-23	CYFIP2
ENSG00000183049	-2.54469	9.14109e-106	4.05466e-104	CAMK1D
ENSG00000151743	-0.64821	1.71065e-16	1.48583e-15	AMN1
ENSG00000214922	-1.05826	3.4582e-07	1.75606e-06	HLA-F-AS1
ENSG00000158445	-2.24773	3.55045e-74	1.0602e-72	KCNB1
ENSG00000146530	-1.79685	1.64095e-21	1.74118e-20	VWDE
ENSG00000168214	-0.662724	3.94303e-43	7.21408e-42	RBPJ
ENSG00000101665	-0.924117	7.18224e-43	1.30955e-41	SMAD7
ENSG00000197208	-0.594572	4.65158e-06	2.1485e-05	SLC22A4
ENSG00000128266	-2.47148	8.83833e-130	5.12063e-128	GNAZ
ENSG00000131398	-2.09322	4.22181e-14	3.27553e-13	KCNC3
ENSG00000146267	-0.774228	2.8829e-26	3.55428e-25	FAXC
ENSG00000164077	0.634512	1.53912e-09	9.31866e-09	MON1A
ENSG00000148143	-2.36692	6.36783e-271	9.51634e-269	ZNF462
ENSG00000073910	-0.602205	2.48309e-25	2.97422e-24	FRY
ENSG00000122912	0.862752	1.21755e-75	3.72617e-74	SLC25A16
ENSG00000146021	-2.71608	3.16429e-24	3.66922e-23	KLHL3
ENSG00000145990	-0.907974	9.07248e-54	1.99688e-52	GFOD1
ENSG00000154122	-1.66512	1.69215e-173	1.43166e-171	ANKH
ENSG00000145920	-5.46765	0	0	CPLX2
ENSG00000100344	0.904329	2.24893e-11	1.51481e-10	PNPLA3
ENSG00000166997	0.892656	4.4265e-50	9.27071e-49	CNPY4
ENSG00000187391	-0.729531	9.67412e-20	9.64426e-19	MAGI2
ENSG00000133056	-0.604083	1.55163e-23	1.75967e-22	PIK3C2B
ENSG00000197763	4.41628	6.05666e-40	1.04251e-38	TXNRD3
ENSG00000145860	-0.692029	1.1826e-26	1.4768e-25	RNF145
ENSG00000183186	-0.901515	1.86723e-23	2.11234e-22	C2CD4C
ENSG00000249859	-2.32404	3.5829e-42	6.44095e-41	PVT1
ENSG00000148660	-0.592216	5.5416e-14	4.26845e-13	CAMK2G
ENSG00000211454	0.894624	2.20556e-20	2.24924e-19	AKR7L
ENSG00000108846	1.33012	4.71073e-142	3.03737e-140	ABCC3
ENSG00000187510	2.33128	6.84594e-16	5.789e-15	PLEKHG7
ENSG00000145687	-0.799483	3.01949e-130	1.75895e-128	SSBP2
ENSG00000079308	-1.31551	1.57887e-61	3.94175e-60	TNS1
ENSG00000155957	0.683586	4.01819e-44	7.46259e-43	TMBIM4
ENSG00000145569	-3.24705	2.62625e-65	6.97012e-64	FAM105A
ENSG00000119698	1.62746	5.16886e-14	3.99095e-13	PPP4R4
ENSG00000145476	1.68337	8.82928e-283	1.42611e-280	CYP4V2
ENSG00000145439	-0.799277	6.12045e-76	1.89302e-74	CBR4
ENSG00000065809	-1.08146	1.50066e-27	1.91587e-26	FAM107B
ENSG00000145365	-0.982972	1.99217e-28	2.61113e-27	TIFA
ENSG00000145349	-1.59534	7.23976e-98	2.93826e-96	CAMK2D
ENSG00000158055	-0.83571	1.36214e-05	6.01861e-05	GRHL3
ENSG00000170153	-2.72899	5.39081e-72	1.56446e-70	RNF150
ENSG00000163376	0.845906	2.75408e-16	2.36897e-15	KBTBD8
ENSG00000067167	0.644795	9.18015e-92	3.46215e-90	TRAM1
ENSG00000188488	-1.3048	2.63848e-36	4.21906e-35	SERPINA5
ENSG00000111671	0.620004	3.41679e-09	2.02206e-08	SPSB2
ENSG00000023902	-2.038	2.23172e-86	8.02843e-85	PLEKHO1
ENSG00000137975	3.42265	6.26551e-185	5.79125e-183	CLCA2
ENSG00000144959	0.979941	5.99942e-62	1.50958e-60	NCEH1
ENSG00000144935	1.13511	5.07945e-20	5.11158e-19	TRPC1
ENSG00000144867	0.661327	1.22199e-54	2.73482e-53	SRPRB
ENSG00000151881	0.933191	3.8983e-30	5.36914e-29	C5orf28
ENSG00000144857	-1.46789	5.30542e-34	8.06045e-33	BOC
ENSG00000144837	1.99469	2.51429e-28	3.28068e-27	PLA1A
ENSG00000144824	1.35799	4.50985e-14	3.49562e-13	PHLDB2
ENSG00000144821	-1.2145	0.000202713	0.000787436	MYH15
ENSG00000207611	-2.20204	9.30258e-09	5.3441e-08	MIR149
ENSG00000170412	1.42541	2.30262e-295	3.98055e-293	GPRC5C
ENSG00000138085	0.888339	2.94423e-138	1.83905e-136	ATRAID
ENSG00000144668	1.44927	1.9993e-41	3.53258e-40	ITGA9
ENSG00000159763	3.21966	1.8659e-30	2.59112e-29	PIP
ENSG00000177383	-0.682682	3.18758e-67	8.67592e-66	MAGEF1
ENSG00000144485	-0.759531	4.56327e-31	6.46316e-30	HES6
ENSG00000144476	-0.959221	6.88693e-24	7.91984e-23	ACKR3
ENSG00000144452	1.20616	1.71482e-13	1.29069e-12	ABCA12
ENSG00000144369	-1.41306	4.83047e-128	2.73907e-126	FAM171B
ENSG00000261342	-1.01559	4.33443e-17	3.87313e-16	AC006538.1
ENSG00000144278	1.16293	3.21786e-40	5.56272e-39	GALNT13
ENSG00000137154	0.608079	8.82397e-80	2.91228e-78	RPS6
ENSG00000144191	1.8011	3.73102e-12	2.62303e-11	CNGA3
ENSG00000144115	0.606875	1.64553e-15	1.36939e-14	THNSL2
ENSG00000240216	-0.85328	0.000104265	0.000418802	CPHL1P
ENSG00000145934	-0.864493	1.18565e-55	2.70652e-54	TENM2
ENSG00000143257	0.95461	1.22455e-08	6.98701e-08	NR1I3
ENSG00000143816	-0.831166	9.13519e-08	4.85787e-07	WNT9A
ENSG00000108684	-2.77846	1.89754e-27	2.41677e-26	ASIC2
ENSG00000203867	1.01848	3.54353e-05	0.0001502	RBM20
ENSG00000143774	0.903388	2.00045e-122	1.07163e-120	GUK1
ENSG00000143753	1.09046	1.46428e-118	7.51669e-117	DEGS1
ENSG00000144649	-0.761559	7.84986e-63	1.99719e-61	FAM198A
ENSG00000143669	1.19648	2.47019e-96	9.838e-95	LYST
ENSG00000143630	-0.72532	2.83136e-21	2.97665e-20	HCN3
ENSG00000131650	-1.5059	5.66331e-117	2.85226e-115	KREMEN2
ENSG00000261487	0.803627	0.000117048	0.000467388	AC135048.13
ENSG00000119950	0.603045	1.06519e-32	1.56841e-31	MXI1
ENSG00000143570	0.877891	4.14261e-144	2.71485e-142	SLC39A1
ENSG00000261069	6.90087	6.93314e-89	2.54276e-87	RP11-701H24.4
ENSG00000143512	4.66454	0	0	HHIPL2
ENSG00000269069	0.955151	3.72526e-07	1.88509e-06	CTC-471F3.5
ENSG00000143499	-1.40622	2.5207e-76	7.82665e-75	SMYD2
ENSG00000050165	-2.88817	1.38518e-13	1.04628e-12	DKK3
ENSG00000143401	-0.808204	8.09204e-63	2.05717e-61	ANP32E
ENSG00000159674	1.83762	2.19727e-45	4.19027e-44	SPON2
ENSG00000161664	-0.781295	5.49431e-06	2.51667e-05	ASB16
ENSG00000174871	-1.89122	5.31549e-24	6.12814e-23	CNIH2
ENSG00000146072	0.834057	2.89784e-56	6.70592e-55	TNFRSF21
ENSG00000142973	-0.911898	2.02564e-09	1.21885e-08	CYP4B1
ENSG00000181690	2.18977	1.49675e-16	1.30216e-15	PLAG1
ENSG00000142675	-3.1028	2.94717e-122	1.57089e-120	CNKSR1
ENSG00000154864	-1.03057	2.91394e-151	2.0303e-149	PIEZO2
ENSG00000188001	-3.05842	1.01616e-44	1.91051e-43	TPRG1
ENSG00000142494	0.852647	0.0002173	0.00084084	SLC47A1
ENSG00000142449	-2.83887	4.03974e-23	4.52205e-22	FBN3
ENSG00000159199	0.788699	3.60069e-55	8.11514e-54	ATP5G1
ENSG00000214215	2.38622	6.06372e-13	4.4366e-12	C12orf74
ENSG00000103978	0.646056	4.49467e-82	1.52595e-80	TMEM87A
ENSG00000142192	0.591626	6.29408e-82	2.13232e-80	APP
ENSG00000197457	-1.92238	0	0	STMN3
ENSG00000142188	0.670584	6.55232e-64	1.69128e-62	TMEM50B
ENSG00000142185	0.681208	2.53618e-20	2.58146e-19	TRPM2
ENSG00000142089	-2.62312	6.00477e-97	2.41558e-95	IFITM3
ENSG00000170266	0.877285	3.18384e-62	8.03648e-61	GLB1
ENSG00000151092	0.67208	2.62816e-37	4.28396e-36	NGLY1
ENSG00000141873	-0.644372	2.24156e-23	2.53222e-22	SLC39A3
ENSG00000163888	-0.938494	2.66713e-08	1.48215e-07	CAMK2N2
ENSG00000141753	1.20169	8.0382e-182	7.26185e-180	IGFBP4
ENSG00000141744	-5.21293	1.79901e-93	6.95696e-92	PNMT
ENSG00000214274	1.28718	9.41999e-81	3.1414e-79	ANG
ENSG00000141569	0.595939	2.37997e-27	3.01919e-26	TRIM65
ENSG00000125170	-1.11585	1.14267e-36	1.841e-35	DOK4
ENSG00000141542	0.812549	1.22363e-45	2.35174e-44	RAB40B
ENSG00000179292	-2.23599	3.18256e-10	2.01308e-09	TMEM151A
ENSG00000214530	1.22205	2.06065e-191	1.99702e-189	STARD10
ENSG00000166165	-1.8878	9.66544e-149	6.63327e-147	CKB
ENSG00000141404	2.03024	1.70318e-94	6.65072e-93	GNAL
ENSG00000141401	1.14783	2.14569e-64	5.59718e-63	IMPA2
ENSG00000169562	4.17515	3.4399e-55	7.75821e-54	GJB1
ENSG00000267056	-1.70204	5.87753e-06	2.68259e-05	AC005336.4
ENSG00000126391	-0.67839	2.13941e-21	2.25959e-20	FRMD8
ENSG00000239390	1.15455	1.3386e-08	7.61874e-08	RN7SL87P
ENSG00000172264	-0.623244	9.92277e-15	7.9335e-14	MACROD2
ENSG00000198910	-5.14792	1.21486e-122	6.5298e-121	L1CAM
ENSG00000089356	1.70302	1.71398e-286	2.84014e-284	FXYD3
ENSG00000140961	1.76542	1.66982e-30	2.32286e-29	OSGIN1
ENSG00000156504	-0.838587	1.83895e-28	2.41228e-27	FAM122B
ENSG00000164694	-3.27353	9.27051e-17	8.15627e-16	FNDC1
ENSG00000172915	-1.40199	8.10314e-166	6.47866e-164	NBEA
ENSG00000140853	-1.01304	7.99903e-07	3.95496e-06	NLRC5
ENSG00000140795	0.900944	6.87832e-12	4.76344e-11	MYLK3
ENSG00000140675	-1.02992	2.23716e-05	9.675e-05	SLC5A2
ENSG00000140650	0.869212	8.38854e-50	1.75114e-48	PMM2
ENSG00000180739	-1.53441	4.90764e-11	3.25018e-10	S1PR5
ENSG00000140488	-2.82444	1.20453e-16	1.05454e-15	CELF6
ENSG00000140474	-0.692406	2.14673e-73	6.32177e-72	ULK3
ENSG00000140465	1.52479	0.000137349	0.00054444	CYP1A1
ENSG00000168268	-0.706382	1.07251e-42	1.94554e-41	NT5DC2
ENSG00000140451	-0.615743	5.64378e-13	4.13692e-12	PIF1
ENSG00000140443	-0.63395	2.84251e-28	3.7014e-27	IGF1R
ENSG00000140406	-0.666736	1.55469e-15	1.29514e-14	MESDC1
ENSG00000140323	-1.84867	5.23329e-65	1.38319e-63	DISP2
ENSG00000140297	2.00664	5.62794e-56	1.29487e-54	GCNT3
ENSG00000140284	-0.703857	2.72625e-23	3.06892e-22	SLC27A2
ENSG00000264448	0.694636	0.00017449	0.000684122	RP3-388N13.5
ENSG00000156463	-4.58042	1.50828e-64	3.95379e-63	SH3RF2
ENSG00000140264	1.0693	2.67639e-212	3.01386e-210	SERF2
ENSG00000188886	-2.7707	2.88461e-25	3.44741e-24	ASTL
ENSG00000176029	2.31077	1.63019e-29	2.20444e-28	C11orf16
ENSG00000103316	3.80769	5.7482e-198	5.87326e-196	CRYM
ENSG00000140022	-0.724245	5.99265e-73	1.75665e-71	STON2
ENSG00000236809	2.12582	5.55756e-08	3.00993e-07	SNX25P1
ENSG00000128268	-1.86923	3.07884e-200	3.20731e-198	MGAT3
ENSG00000139985	1.16418	4.07042e-12	2.85411e-11	ADAM21
ENSG00000181652	-1.24747	1.03904e-14	8.29906e-14	ATG9B
ENSG00000198513	1.16402	9.24591e-14	7.05207e-13	ATL1
ENSG00000139970	-4.70444	1.71531e-92	6.53063e-91	RTN1
ENSG00000172348	-1.14625	3.09319e-06	1.45091e-05	RCAN2
ENSG00000139926	0.844494	1.8608e-82	6.35792e-81	FRMD6
ENSG00000140859	1.22963	2.04139e-09	1.22787e-08	KIFC3
ENSG00000273173	4.33283	1.94331e-28	2.54813e-27	SNURF
ENSG00000078900	-1.18168	4.66372e-39	7.9251e-38	TP73
ENSG00000104760	2.06357	6.03446e-09	3.50378e-08	FGL1
ENSG00000136098	-1.74362	1.70691e-25	2.05839e-24	NEK3
ENSG00000169715	-1.63808	1.09439e-05	4.87463e-05	MT1E
ENSG00000139679	-1.04481	1.30538e-25	1.58208e-24	LPAR6
ENSG00000231721	1.67858	1.47275e-27	1.88099e-26	LINC-PINT
ENSG00000139445	1.31274	0.000141469	0.000559734	FOXN4
ENSG00000179698	-0.716296	6.55633e-08	3.53112e-07	WDR97
ENSG00000196705	-1.28422	6.91906e-281	1.09544e-278	ZNF431
ENSG00000139352	2.63938	1.00795e-11	6.92336e-11	ASCL1
ENSG00000100027	-0.649405	4.77065e-20	4.80234e-19	YPEL1
ENSG00000234851	0.646166	6.90076e-31	9.70933e-30	RPL23AP42
ENSG00000161267	0.808078	1.17312e-52	2.54529e-51	BDH1
ENSG00000270704	3.80397	3.8732e-22	4.19752e-21	RP11-701H24.5
ENSG00000189120	-0.719865	0.000107142	0.000429483	SP6
ENSG00000154473	-0.801001	2.4975e-148	1.70304e-146	BUB3
ENSG00000177875	-1.14365	2.27466e-07	1.172e-06	CCDC184
ENSG00000139112	1.60697	1.2269e-53	2.69488e-52	GABARAPL1
ENSG00000139083	-0.783955	4.44089e-28	5.76162e-27	ETV6
ENSG00000177169	-1.3739	1.36238e-106	6.09377e-105	ULK1
ENSG00000157851	-3.36742	0	0	DPYSL5
ENSG00000138829	-5.92876	1.5283e-120	8.02573e-119	FBN2
ENSG00000138821	-2.89479	1.29553e-41	2.3018e-40	SLC39A8
ENSG00000130956	0.93621	7.86903e-25	9.28632e-24	HABP4
ENSG00000157036	-0.959331	6.91589e-06	3.13637e-05	EXOG
ENSG00000158292	-0.952731	3.04416e-24	3.53249e-23	GPR153
ENSG00000138696	2.69224	1.29313e-29	1.75459e-28	BMPR1B
ENSG00000138678	-3.48658	2.71768e-108	1.23986e-106	GPAT3
ENSG00000118508	-1.11388	9.30828e-52	1.99791e-50	RAB32
ENSG00000050628	-2.67352	1.04361e-31	1.49868e-30	PTGER3
ENSG00000138646	-1.19552	4.90781e-08	2.66752e-07	HERC5
ENSG00000138613	-0.638278	4.97384e-14	3.84409e-13	APH1B
ENSG00000155368	0.883048	4.3352e-115	2.13627e-113	DBI
ENSG00000163110	-0.719763	6.99491e-85	2.4856e-83	PDLIM5
ENSG00000254902	1.48491	0.000219985	0.000850603	ANO1-AS1
ENSG00000168394	0.606499	3.1452e-08	1.73665e-07	TAP1
ENSG00000278934	-1.90756	1.71937e-07	8.94538e-07	CTD-2006M22.2
ENSG00000153823	-0.999871	2.34289e-10	1.49446e-09	PID1
ENSG00000137962	0.674896	6.94514e-68	1.90818e-66	ARHGAP29
ENSG00000138172	-0.627218	8.28611e-21	8.57044e-20	CALHM2
ENSG00000082196	-0.828797	6.71019e-09	3.88133e-08	C1QTNF3
ENSG00000104324	-1.96757	5.62211e-49	1.15331e-47	CPQ
ENSG00000138074	0.877426	1.74007e-104	7.58164e-103	SLC5A6
ENSG00000138061	-1.20437	2.61768e-201	2.75382e-199	CYP1B1
ENSG00000165868	-0.853265	3.37738e-30	4.65568e-29	HSPA12A
ENSG00000260902	-1.71214	2.70682e-06	1.2751e-05	RP11-95M5.1
ENSG00000137941	-0.781552	9.03357e-48	1.80903e-46	TTLL7
ENSG00000137878	-1.88596	4.00781e-09	2.36091e-08	GCOM1
ENSG00000158856	-2.3419	6.85882e-17	6.06783e-16	DMTN
ENSG00000137842	2.35435	0	0	TMEM62
ENSG00000137834	1.9401	7.54169e-196	7.65685e-194	SMAD6
ENSG00000140299	-1.2684	2.04899e-175	1.77105e-173	BNIP2
ENSG00000137821	-0.848304	7.66185e-32	1.10525e-30	LRRC49
ENSG00000137817	-0.999664	3.79568e-87	1.3763e-85	PARP6
ENSG00000137710	1.20731	4.84404e-136	2.98492e-134	RDX
ENSG00000119640	-0.941936	1.12802e-36	1.81922e-35	ACYP1
ENSG00000197308	-0.799177	1.15238e-35	1.81637e-34	GATA3-AS1
ENSG00000165752	-1.4679	2.64615e-78	8.56543e-77	STK32C
ENSG00000166575	0.966944	9.6264e-83	3.31034e-81	TMEM135
ENSG00000162981	-1.82788	0	0	FAM84A
ENSG00000109670	-0.936014	1.79015e-252	2.4677e-250	FBXW7
ENSG00000166819	0.990673	6.6338e-05	0.000273256	PLIN1
ENSG00000164291	0.634879	6.43026e-22	6.91247e-21	ARSK
ENSG00000115084	0.707468	2.12862e-84	7.50555e-83	SLC35F5
ENSG00000067113	0.956361	1.12915e-29	1.536e-28	PLPP1
ENSG00000171943	-0.609688	3.13801e-19	3.05406e-18	SRGAP2C
ENSG00000131771	-0.864592	2.80689e-27	3.55655e-26	PPP1R1B
ENSG00000183340	0.702511	7.75674e-05	0.000317142	JRKL
ENSG00000133104	0.598766	2.80803e-14	2.19354e-13	SPG20
ENSG00000106537	1.3182	0	0	TSPAN13
ENSG00000108654	-0.605843	2.18301e-77	6.89871e-76	DDX5
ENSG00000005513	-1.55615	3.87287e-05	0.000163682	SOX8
ENSG00000112294	-1.78923	4.31207e-78	1.38181e-76	ALDH5A1
ENSG00000108551	1.40094	8.48404e-15	6.81044e-14	RASD1
ENSG00000279289	1.272	2.18731e-08	1.22423e-07	RP3-331H24.6
ENSG00000112706	1.42829	7.06197e-07	3.50806e-06	IMPG1
ENSG00000251580	-0.707362	0.000103633	0.000416526	RP11-539L10.3
ENSG00000117791	2.32193	1.48211e-109	6.90955e-108	2017-03-02
ENSG00000117479	0.896072	5.20326e-115	2.56008e-113	SLC19A2
ENSG00000103811	-0.828994	6.29639e-09	3.65122e-08	CTSH
ENSG00000161082	-1.07528	1.07548e-23	1.2262e-22	CELF5
ENSG00000121691	0.825329	3.04083e-106	1.35822e-104	CAT
ENSG00000106799	1.30042	0	0	TGFBR1
ENSG00000185532	-4.66906	9.9471e-155	7.14872e-153	PRKG1
ENSG00000169247	0.967158	6.09334e-11	4.01383e-10	SH3TC2
ENSG00000107679	2.7611	2.35431e-191	2.27472e-189	PLEKHA1
ENSG00000102189	0.595189	8.4402e-49	1.72587e-47	EEA1
ENSG00000198818	1.59116	4.30373e-125	2.36491e-123	SFT2D1
ENSG00000105519	0.651465	7.91462e-28	1.01899e-26	CAPS
ENSG00000155099	-0.906122	6.56953e-27	8.24245e-26	TMEM55A
ENSG00000181817	0.883547	1.13414e-20	1.16814e-19	LSM10
ENSG00000125844	1.07858	2.25514e-184	2.07843e-182	RRBP1
ENSG00000169991	-1.1207	8.20348e-55	1.8398e-53	IFFO2
ENSG00000240606	0.821651	4.57349e-07	2.30001e-06	RN7SL564P
ENSG00000177426	-0.675652	2.43139e-31	3.459e-30	TGIF1
ENSG00000148175	1.05457	2.05603e-183	1.87868e-181	STOM
ENSG00000118137	-2.04802	6.83454e-08	3.67477e-07	APOA1
ENSG00000135406	-1.72316	7.65211e-31	1.07476e-29	PRPH
ENSG00000225708	1.19544	1.40082e-05	6.18268e-05	RP13-379L11.1
ENSG00000084710	-1.59464	5.98657e-106	2.66653e-104	EFR3B
ENSG00000107105	-1.61653	2.35715e-81	7.93514e-80	ELAVL2
ENSG00000128596	-2.11197	6.65968e-31	9.38252e-30	CCDC136
ENSG00000106829	1.33395	2.33873e-19	2.2887e-18	TLE4
ENSG00000143878	0.872205	2.05253e-133	1.24087e-131	RHOB
ENSG00000167767	-0.693808	0.000134745	0.000534718	KRT80
ENSG00000230699	-2.99892	4.95886e-32	7.17924e-31	RP11-54O7.1
ENSG00000106804	2.45536	0	0	C5
ENSG00000172159	-4.1851	7.94339e-208	8.64073e-206	FRMD3
ENSG00000007062	2.78558	4.6069e-33	6.85272e-32	PROM1
ENSG00000164056	4.80198	1.11949e-307	2.06951e-305	SPRY1
ENSG00000116663	0.630348	1.2657e-15	1.05826e-14	FBXO6
ENSG00000181019	2.3846	0	0	NQO1
ENSG00000132669	1.32221	2.07458e-54	4.62995e-53	RIN2
ENSG00000072422	-0.963289	6.93502e-40	1.19241e-38	RHOBTB1
ENSG00000106415	-0.677596	5.86833e-36	9.30005e-35	GLCCI1
ENSG00000147799	0.59994	7.15636e-24	8.21492e-23	ARHGAP39
ENSG00000183230	1.35448	2.05081e-05	8.90644e-05	CTNNA3
ENSG00000186458	-1.95004	5.06773e-07	2.53871e-06	DEFB132
ENSG00000174705	-1.16901	3.62191e-54	8.04391e-53	SH3PXD2B
ENSG00000171863	0.669823	3.85222e-147	2.58819e-145	RPS7
ENSG00000106144	-0.704401	2.38738e-43	4.39049e-42	CASP2
ENSG00000106069	0.646489	3.58238e-40	6.18617e-39	CHN2
ENSG00000170703	1.55435	1.03205e-71	2.96816e-70	TTLL6
ENSG00000150672	-0.589278	3.21941e-08	1.7767e-07	DLG2
ENSG00000135378	0.586544	9.74174e-43	1.76917e-41	PRRG4
ENSG00000103642	0.899969	5.0805e-30	6.98236e-29	LACTB
ENSG00000121753	-2.04843	3.48896e-93	1.34111e-91	ADGRB2
ENSG00000135052	2.14881	0	0	GOLM1
ENSG00000105835	1.03284	1.87576e-178	1.66635e-176	NAMPT
ENSG00000135519	-1.60482	1.41667e-45	2.71621e-44	KCNH3
ENSG00000066629	-1.28844	9.82829e-61	2.4253e-59	EML1
ENSG00000183444	1.70588	2.12081e-16	1.83313e-15	OR7E38P
ENSG00000105613	-2.19333	1.06434e-74	3.20516e-73	MAST1
ENSG00000135362	-0.997566	7.47206e-05	0.000305972	PRR5L
ENSG00000136147	0.947356	2.50745e-19	2.44782e-18	PHF11
ENSG00000198075	2.95942	3.3933e-148	2.30406e-146	SULT1C4
ENSG00000146700	-2.30799	8.2443e-54	1.81585e-52	SSC4D
ENSG00000105523	3.13681	8.42701e-119	4.34684e-117	FAM83E
ENSG00000107371	-0.601967	1.97072e-33	2.95756e-32	EXOSC3
ENSG00000117394	0.952935	3.77557e-172	3.1692e-170	SLC2A1
ENSG00000168993	-0.732437	1.29568e-15	1.08219e-14	CPLX1
ENSG00000105419	-1.27675	1.49395e-76	4.66128e-75	MEIS3
ENSG00000116176	-0.780178	7.40869e-05	0.000303532	TPSG1
ENSG00000143147	2.12307	1.80681e-90	6.75041e-89	GPR161
ENSG00000173193	-0.784901	2.26878e-61	5.65091e-60	PARP14
ENSG00000239467	1.11119	6.72802e-08	3.61933e-07	AC007405.6
ENSG00000187037	3.19172	3.26819e-27	4.1345e-26	GPR141
ENSG00000267100	-0.595075	4.39783e-15	3.58794e-14	ILF3-AS1
ENSG00000181544	-0.704523	4.52986e-27	5.71027e-26	FANCB
ENSG00000180730	-5.86449	0	0	SHISA2
ENSG00000167460	-0.682945	2.6747e-43	4.91606e-42	TPM4
ENSG00000213231	1.25494	1.9634e-05	8.54655e-05	TCL1B
ENSG00000138944	2.56753	8.04669e-13	5.84734e-12	KIAA1644
ENSG00000234231	-1.63346	8.21899e-15	6.60431e-14	AC093616.4
ENSG00000117114	0.797163	6.96775e-100	2.89397e-98	ADGRL2
ENSG00000173852	-1.36361	1.04364e-68	2.88976e-67	DPY19L1
ENSG00000146426	-0.651307	4.71773e-09	2.76333e-08	TIAM2
ENSG00000160211	1.49294	2.95569e-132	1.76354e-130	G6PD
ENSG00000173221	1.77522	1.30766e-155	9.46161e-154	GLRX
ENSG00000119782	-2.12968	2.42716e-33	3.63574e-32	FKBP1B
ENSG00000276956	1.04229	4.64964e-06	2.14792e-05	RN7SL769P
ENSG00000126259	-2.04877	1.83545e-40	3.185e-39	KIRREL2
ENSG00000171502	0.737424	1.61587e-08	9.14638e-08	COL24A1
ENSG00000104823	1.21642	2.58626e-115	1.27641e-113	ECH1
ENSG00000008056	-2.38093	2.325e-23	2.62371e-22	SYN1
ENSG00000144406	-1.66521	5.65698e-73	1.65978e-71	UNC80
ENSG00000090013	1.13299	1.1625e-92	4.43649e-91	BLVRB
ENSG00000008282	1.06231	5.17418e-121	2.73513e-119	SYPL1
ENSG00000104723	-0.829442	1.83999e-65	4.88743e-64	TUSC3
ENSG00000133454	3.61183	2.78583e-42	5.01371e-41	MYO18B
ENSG00000136932	0.640531	1.25481e-08	7.15329e-08	TRMO
ENSG00000110492	0.97125	1.93456e-44	3.62231e-43	MDK
ENSG00000120658	-1.07696	2.46916e-17	2.22816e-16	ENOX1
ENSG00000104518	-2.94825	4.17487e-298	7.37661e-296	GSDMD
ENSG00000070731	0.665401	1.43216e-110	6.75818e-109	ST6GALNAC2
ENSG00000125347	-1.08847	7.21594e-26	8.81486e-25	IRF1
ENSG00000244239	1.45471	3.43594e-19	3.33895e-18	AC007009.1
ENSG00000196834	1.41059	2.20882e-59	5.3678e-58	POTEI
ENSG00000226054	2.15285	4.05271e-12	2.84248e-11	MEMO1P1
ENSG00000105559	-4.674	1.21655e-146	8.1565e-145	PLEKHA4
ENSG00000179532	1.01567	4.44182e-35	6.89917e-34	DNHD1
ENSG00000143869	1.20664	5.03194e-06	2.31582e-05	GDF7
ENSG00000104290	1.05334	2.52948e-60	6.21316e-59	FZD3
ENSG00000181191	-0.905703	2.13916e-44	4.00307e-43	PJA1
ENSG00000137449	-0.852564	8.23592e-58	1.95395e-56	CPEB2
ENSG00000176697	3.51293	3.79877e-49	7.82787e-48	BDNF
ENSG00000061337	-2.67715	5.69125e-27	7.14894e-26	LZTS1
ENSG00000171227	-2.1845	5.44394e-10	3.39911e-09	TMEM37
ENSG00000103710	-3.69871	2.27668e-26	2.81884e-25	RASL12
ENSG00000135373	1.92365	0	0	EHF
ENSG00000185668	-1.38279	3.03219e-06	1.42334e-05	POU3F1
ENSG00000168758	-0.994576	3.13998e-105	1.3775e-103	SEMA4C
ENSG00000206656	2.11892	4.47134e-09	2.6243e-08	SNORD116-17
ENSG00000124302	-2.14428	8.09066e-34	1.22571e-32	CHST8
ENSG00000163293	1.56494	1.46368e-105	6.4744e-104	NIPAL1
ENSG00000040608	-0.99809	4.2743e-19	4.14106e-18	RTN4R
ENSG00000103485	-1.21116	2.90054e-79	9.51406e-78	QPRT
ENSG00000114279	-2.79751	7.59609e-219	8.99743e-217	FGF12
ENSG00000180066	1.51939	1.71975e-07	8.9459e-07	C10orf91
ENSG00000179915	-4.40884	9.67402e-257	1.36896e-254	NRXN1
ENSG00000125999	1.70483	1.14279e-265	1.68421e-263	BPIFB1
ENSG00000085514	0.807081	7.231e-05	0.000296404	PILRA
ENSG00000206052	-5.87211	2.38319e-122	1.27453e-120	DOK6
ENSG00000144152	-2.03441	2.8116e-15	2.31332e-14	FBLN7
ENSG00000105655	-0.669535	6.07392e-52	1.30808e-50	ISYNA1
ENSG00000133216	-2.64203	1.16489e-83	4.06708e-82	EPHB2
ENSG00000103089	1.98002	4.51859e-35	7.01501e-34	FA2H
ENSG00000103056	-1.85542	1.01845e-49	2.11914e-48	SMPD3
ENSG00000216490	2.62721	0	0	IFI30
ENSG00000116661	-1.22339	1.88489e-64	4.9249e-63	FBXO2
ENSG00000100219	1.25683	0	0	XBP1
ENSG00000102924	-3.8753	5.14587e-210	5.69447e-208	CBLN1
ENSG00000176641	1.46658	0	0	RNF152
ENSG00000101746	-1.8982	6.54099e-11	4.30073e-10	NOL4
ENSG00000107159	2.33901	8.31729e-13	6.03574e-12	CA9
ENSG00000130294	-1.29209	1.97624e-76	6.15404e-75	KIF1A
ENSG00000167971	-1.17464	9.27426e-31	1.30031e-29	CASKIN1
ENSG00000179588	-0.825866	9.24228e-10	5.68418e-09	ZFPM1
ENSG00000127418	-0.904621	3.75798e-38	6.24332e-37	FGFRL1
ENSG00000178623	1.16562	7.39839e-19	7.12889e-18	GPR35
ENSG00000146233	-1.31617	3.78627e-13	2.80103e-12	CYP39A1
ENSG00000148735	1.49041	1.1334e-12	8.16195e-12	PLEKHS1
ENSG00000137648	1.23823	9.75905e-40	1.67348e-38	TMPRSS4
ENSG00000122852	1.56723	4.82848e-07	2.42303e-06	SFTPA1
ENSG00000106665	-1.86363	1.52901e-63	3.92135e-62	CLIP2
ENSG00000102312	0.730798	7.16609e-12	4.95522e-11	PORCN
ENSG00000155265	-4.14423	3.60341e-213	4.11573e-211	GOLGA7B
ENSG00000122565	-0.61973	1.1805e-93	4.57066e-92	CBX3
ENSG00000162627	-4.66902	3.55817e-45	6.74534e-44	SNX7
ENSG00000077279	-5.39797	1.35899e-175	1.17783e-173	DCX
ENSG00000176153	1.60937	5.53691e-14	4.26586e-13	GPX2
ENSG00000151692	-0.645346	5.75343e-12	4.00088e-11	RNF144A
ENSG00000102100	0.651055	1.26535e-29	1.71762e-28	SLC35A2
ENSG00000248771	1.33063	1.3552e-12	9.72632e-12	LINC01207
ENSG00000102032	0.789305	5.63468e-05	0.000233999	RENBP
ENSG00000023909	0.64697	8.77565e-38	1.44593e-36	GCLM
ENSG00000101955	-1.36088	5.53868e-05	0.000230132	SRPX
ENSG00000117748	-0.839683	1.55552e-84	5.49086e-83	RPA2
ENSG00000180777	3.21536	0	0	ANKRD30B
ENSG00000119878	-0.616722	1.38151e-08	7.84902e-08	CRIPT
ENSG00000106049	0.774176	9.07962e-47	1.77817e-45	HIBADH
ENSG00000135046	2.86471	4.31312e-36	6.86599e-35	ANXA1
ENSG00000101981	2.27363	3.3864e-09	2.00556e-08	F9
ENSG00000112378	5.43055	0	0	PERP
ENSG00000178826	-0.772459	7.12009e-07	3.53473e-06	TMEM139
ENSG00000137331	-2.757	6.83271e-129	3.9231e-127	IER3
ENSG00000089876	1.0578	2.57785e-40	4.46116e-39	DHX32
ENSG00000108932	1.15535	8.06213e-48	1.61652e-46	SLC16A6
ENSG00000143882	0.864053	7.57001e-15	6.09201e-14	ATP6V1C2
ENSG00000138759	-2.26702	3.4718e-15	2.84551e-14	FRAS1
ENSG00000186648	-1.41453	1.11005e-57	2.62966e-56	LRRC16B
ENSG00000116014	-5.15408	1.20197e-170	1.00104e-168	KISS1R
ENSG00000160190	0.973332	1.98194e-109	9.19949e-108	SLC37A1
ENSG00000101435	-1.64939	4.42686e-05	0.000186161	CST9L
ENSG00000176907	-1.38178	2.08556e-05	9.05366e-05	C8orf4
ENSG00000177432	1.032	5.06644e-12	3.53314e-11	NAP1L5
ENSG00000159733	0.678002	2.01658e-06	9.61564e-06	ZFYVE28
ENSG00000125864	1.90807	1.55538e-43	2.86866e-42	BFSP1
ENSG00000162512	-1.73001	5.12222e-73	1.50426e-71	SDC3
ENSG00000167183	1.27311	7.31343e-116	3.63185e-114	PRR15L
ENSG00000184845	-2.85239	7.55829e-13	5.50243e-12	DRD1
ENSG00000105427	0.634115	8.89383e-06	3.99317e-05	CNFN
ENSG00000064195	-3.55986	5.31755e-25	6.30555e-24	DLX3
ENSG00000101180	-4.09542	9.07816e-106	4.03234e-104	HRH3
ENSG00000152778	1.04478	1.02088e-18	9.7839e-18	IFIT5
ENSG00000067141	-0.690617	2.05247e-69	5.73275e-68	NEO1
ENSG00000276281	0.712979	8.82061e-06	3.96085e-05	RN7SL126P
ENSG00000162878	-2.05624	0	0	PKDCC
ENSG00000107821	0.719899	3.33913e-43	6.12673e-42	KAZALD1
ENSG00000163412	0.923181	3.89744e-18	3.64456e-17	EIF4E3
ENSG00000101160	-0.975644	2.83218e-24	3.29128e-23	CTSZ
ENSG00000101098	-6.14653	1.43274e-110	6.75818e-109	RIMS4
ENSG00000124766	-1.74319	0	0	SOX4
ENSG00000142156	1.05003	3.55556e-07	1.80235e-06	COL6A1
ENSG00000260614	-1.54503	0.000134268	0.00053289	RP11-491F9.1
ENSG00000109736	0.630233	7.55933e-48	1.51856e-46	MFSD10
ENSG00000101844	0.684762	4.26532e-23	4.76955e-22	ATG4A
ENSG00000104312	0.886781	5.51626e-26	6.76181e-25	RIPK2
ENSG00000102879	1.46714	9.75936e-29	1.28919e-27	CORO1A
ENSG00000171067	0.80828	1.94759e-41	3.44311e-40	C11orf24
ENSG00000169231	0.652105	8.2112e-16	6.92334e-15	THBS3
ENSG00000242574	3.38442	4.45192e-64	1.15378e-62	HLA-DMB
ENSG00000152931	-0.891829	3.43105e-29	4.59114e-28	PART1
ENSG00000108679	0.588881	4.07225e-64	1.05624e-62	LGALS3BP
ENSG00000146278	-0.945971	1.43332e-98	5.86178e-97	PNRC1
ENSG00000145819	4.13211	2.54279e-259	3.64668e-257	ARHGAP26
ENSG00000124466	0.748458	1.0792e-17	9.87522e-17	LYPD3
ENSG00000139055	2.33382	8.22072e-29	1.08909e-27	ERP27
ENSG00000152952	-4.60831	5.41806e-174	4.62067e-172	PLOD2
ENSG00000137491	-1.5555	1.08114e-08	6.19529e-08	SLCO2B1
ENSG00000100234	2.31048	0	0	TIMP3
ENSG00000198416	0.610415	1.31455e-05	5.81714e-05	ZNF658B
ENSG00000162817	1.84287	2.63758e-227	3.21955e-225	C1orf115
ENSG00000108666	-1.12255	2.98045e-78	9.62805e-77	C17orf75
ENSG00000137193	-0.734063	4.3914e-10	2.75645e-09	PIM1
ENSG00000120915	0.656099	9.78716e-14	7.45956e-13	EPHX2
ENSG00000123607	-0.954174	2.88056e-116	1.43718e-114	TTC21B
ENSG00000102781	-1.05435	5.48263e-54	1.21259e-52	KATNAL1
ENSG00000137727	-3.59348	1.00914e-22	1.11518e-21	ARHGAP20
ENSG00000163362	3.53257	2.79275e-287	4.67617e-285	C1orf106
ENSG00000073711	0.631181	1.11956e-19	1.11263e-18	PPP2R3A
ENSG00000086548	4.08808	3.13647e-105	1.3775e-103	CEACAM6
ENSG00000263968	0.822902	1.68354e-07	8.76752e-07	RN7SL381P
ENSG00000188672	1.36235	1.11202e-07	5.87537e-07	RHCE
ENSG00000101213	1.73352	1.18161e-83	4.12094e-82	PTK6
ENSG00000100417	0.671883	1.06331e-24	1.24975e-23	PMM1
ENSG00000167371	-1.27082	1.73199e-26	2.1511e-25	PRRT2
ENSG00000178184	-0.933618	1.46936e-33	2.20928e-32	PARD6G
ENSG00000099282	1.17982	1.29809e-189	1.24667e-187	TSPAN15
ENSG00000173638	-0.618382	2.64071e-22	2.88037e-21	SLC19A1
ENSG00000228901	-1.38617	4.14807e-05	0.000174782	HMGN2P36
ENSG00000115525	1.38191	3.67156e-147	2.47201e-145	ST3GAL5
ENSG00000101977	-2.85929	9.80579e-13	7.08538e-12	MCF2
ENSG00000115507	1.32543	9.51185e-16	7.9947e-15	OTX1
ENSG00000146151	-1.69692	3.74233e-10	2.35876e-09	HMGCLL1
ENSG00000004799	1.01128	4.62953e-61	1.14773e-59	PDK4
ENSG00000240694	1.26968	4.76702e-18	4.43696e-17	PNMA2
ENSG00000102003	-2.86052	0	0	SYP
ENSG00000181381	-0.847973	7.65184e-44	1.41945e-42	DDX60L
ENSG00000115963	-3.00721	0	0	RND3
ENSG00000109756	1.53433	5.3098e-61	1.31536e-59	RAPGEF2
ENSG00000162433	-2.34586	0	0	AK4
ENSG00000072310	0.810776	5.28692e-81	1.77048e-79	SREBF1
ENSG00000171450	-2.93966	4.85917e-17	4.33234e-16	CDK5R2
ENSG00000171385	-2.98753	9.11807e-51	1.92988e-49	KCND3
ENSG00000112562	0.901267	6.77419e-18	6.26142e-17	SMOC2
ENSG00000125508	1.2253	3.661e-20	3.69928e-19	SRMS
ENSG00000106688	-1.51036	3.98541e-20	4.02074e-19	SLC1A1
ENSG00000184058	-1.90958	7.76449e-26	9.46688e-25	TBX1
ENSG00000154978	-1.66937	3.4514e-142	2.22988e-140	VOPP1
ENSG00000101871	-0.869433	4.90558e-08	2.66676e-07	MID1
ENSG00000115738	-1.14626	1.6305e-200	1.70968e-198	ID2
ENSG00000100095	2.18943	1.38795e-21	1.47566e-20	SEZ6L
ENSG00000178171	-2.23223	2.59301e-36	4.1505e-35	AMER3
ENSG00000123505	0.693993	2.6562e-61	6.59533e-60	AMD1
ENSG00000100077	-0.813833	3.34671e-60	8.19534e-59	ADRBK2
ENSG00000214160	1.01277	2.07679e-36	3.33423e-35	ALG3
ENSG00000151136	-1.63129	1.70824e-14	1.35025e-13	BTBD11
ENSG00000107537	0.868522	1.12014e-39	1.91978e-38	PHYH
ENSG00000078053	1.57181	4.82555e-06	2.225e-05	AMPH
ENSG00000162909	0.937642	7.06042e-12	4.88426e-11	CAPN2
ENSG00000273549	0.925854	0.000241932	0.000930964	Metazoa_SRP
ENSG00000099953	-1.86422	1.95422e-33	2.93418e-32	MMP11
ENSG00000228221	1.82637	1.03273e-07	5.47179e-07	LINC00578
ENSG00000133874	0.959277	1.61284e-05	7.08034e-05	RNF122
ENSG00000177409	2.86973	9.52408e-19	9.13586e-18	SAMD9L
ENSG00000183010	0.887554	4.97155e-140	3.14842e-138	PYCR1
ENSG00000074590	-2.17477	2.50888e-105	1.10367e-103	NUAK1
ENSG00000105810	1.80067	3.54655e-303	6.40804e-301	CDK6
ENSG00000099849	0.689773	1.5672e-30	2.18296e-29	RASSF7
ENSG00000279560	1.2119	8.07611e-06	3.6388e-05	AC007326.1
ENSG00000099377	2.2432	2.07625e-305	3.79431e-303	HSD3B7
ENSG00000115295	-2.22448	1.47358e-117	7.45675e-116	CLIP4
ENSG00000181625	0.62983	4.86823e-08	2.64735e-07	SLX1B
ENSG00000164733	0.884211	1.96241e-112	9.38115e-111	CTSB
ENSG00000249141	1.86016	4.12231e-09	2.42568e-08	RP11-514O12.4
ENSG00000140955	-2.60173	1.13951e-11	7.79855e-11	ADAD2
ENSG00000165816	2.11788	3.75586e-13	2.77982e-12	VWA2
ENSG00000254772	0.926158	6.5155e-186	6.07499e-184	EEF1G
ENSG00000105854	1.25872	1.45941e-250	1.99459e-248	PON2
ENSG00000144063	-1.5981	3.33245e-10	2.10539e-09	MALL
ENSG00000128965	1.82086	9.87498e-19	9.46678e-18	CHAC1
ENSG00000150556	-0.920212	1.06297e-24	1.24975e-23	LYPD6B
ENSG00000095713	-4.32332	1.59272e-34	2.44771e-33	CRTAC1
ENSG00000197249	3.75758	1.92627e-254	2.69013e-252	SERPINA1
ENSG00000095637	-1.7656	1.8759e-22	2.05809e-21	SORBS1
ENSG00000145911	-1.34468	4.39447e-89	1.62099e-87	N4BP3
ENSG00000099194	1.25585	0	0	SCD
ENSG00000124788	2.44839	0	0	ATXN1
ENSG00000114654	1.22401	1.24072e-08	7.07551e-08	EFCC1
ENSG00000095539	1.6881	9.28952e-64	2.38817e-62	SEMA4G
ENSG00000009694	1.35735	1.39203e-07	7.28963e-07	TENM1
ENSG00000095209	-0.996114	5.1299e-86	1.83512e-84	TMEM38B
ENSG00000136235	2.60209	6.9054e-34	1.04714e-32	GPNMB
ENSG00000280079	-0.632555	1.75228e-08	9.90275e-08	CTC-260E6.4
ENSG00000105339	-0.61228	1.84592e-08	1.04099e-07	DENND3
ENSG00000224087	2.54838	4.97815e-15	4.04487e-14	AC018804.3
ENSG00000120262	0.786646	4.70696e-45	8.89676e-44	CCDC170
ENSG00000050748	-0.994429	2.76241e-188	2.61375e-186	MAPK9
ENSG00000198074	1.19802	8.54294e-05	0.000347598	AKR1B10
ENSG00000168453	-0.957169	1.70995e-37	2.8001e-36	HR
ENSG00000160191	-0.936363	7.90751e-21	8.18414e-20	PDE9A
ENSG00000006283	-1.16508	1.68684e-21	1.78928e-20	CACNA1G
ENSG00000135549	2.29283	1.67195e-128	9.56542e-127	PKIB
ENSG00000181215	-1.83291	2.81173e-08	1.55952e-07	C4orf50
ENSG00000007237	1.5482	4.1722e-22	4.51697e-21	GAS7
ENSG00000154734	-2.71545	8.32803e-28	1.07135e-26	ADAMTS1
ENSG00000092421	2.35114	1.22054e-79	4.02412e-78	SEMA6A
ENSG00000090776	-1.03201	1.05183e-35	1.66035e-34	EFNB1
ENSG00000260001	-1.21285	5.68594e-06	2.5996e-05	TGFBR3L
ENSG00000105443	-0.620777	1.36481e-48	2.77836e-47	CYTH2
ENSG00000109321	-1.95279	3.82781e-91	1.43851e-89	AREG
ENSG00000114841	0.723159	3.80858e-13	2.81624e-12	DNAH1
ENSG00000100292	0.808692	1.17614e-08	6.71923e-08	HMOX1
ENSG00000153930	4.31334	1.48107e-56	3.44731e-55	ANKFN1
ENSG00000092068	0.795668	9.90181e-32	1.42387e-30	SLC7A8
ENSG00000138411	-2.18629	1.61951e-181	1.45897e-179	HECW2
ENSG00000100505	-1.07757	2.79131e-23	3.13885e-22	TRIM9
ENSG00000132932	-2.94836	7.04136e-15	5.68087e-14	ATP8A2
ENSG00000091527	-0.968496	5.30833e-253	7.34917e-251	CDV3
ENSG00000091490	1.79441	1.08852e-41	1.93615e-40	SEL1L3
ENSG00000099998	-2.54002	3.59094e-82	1.22172e-80	GGT5
ENSG00000176840	-5.00413	1.87337e-165	1.48666e-163	MIR7-3HG
ENSG00000091436	-0.925757	5.76587e-149	3.9741e-147	AC013461.1
ENSG00000249839	-0.847102	1.97786e-08	1.11108e-07	AC011330.5
ENSG00000106443	-0.9895	4.4073e-169	3.64211e-167	PHF14
ENSG00000090975	0.920321	3.53269e-05	0.00014976	PITPNM2
ENSG00000111348	3.63318	1.69665e-37	2.77974e-36	ARHGDIB
ENSG00000099954	0.590629	1.45315e-28	1.91247e-27	CECR2
ENSG00000211584	0.887292	4.16558e-54	9.23851e-53	SLC48A1
ENSG00000143167	4.90797	1.16483e-64	3.05848e-63	GPA33
ENSG00000134215	-0.822699	1.35734e-92	5.1739e-91	VAV3
ENSG00000104763	0.770501	3.03506e-86	1.08939e-84	ASAH1
ENSG00000188263	2.47925	4.60225e-22	4.97245e-21	IL17REL
ENSG00000101203	2.50562	5.88171e-15	4.75969e-14	COL20A1
ENSG00000096006	6.82897	0	0	CRISP3
ENSG00000149582	0.695195	2.23666e-35	3.50296e-34	TMEM25
ENSG00000090238	0.667885	3.16248e-20	3.20772e-19	YPEL3
ENSG00000130600	-1.73229	4.49585e-08	2.45152e-07	H19
ENSG00000230487	0.902594	1.04234e-20	1.07498e-19	PSMG3-AS1
ENSG00000271361	0.739434	2.55086e-05	0.000109767	HTATSF1P2
ENSG00000128487	1.38068	4.00604e-136	2.47809e-134	SPECC1
ENSG00000154229	1.12828	1.99076e-21	2.10677e-20	PRKCA
ENSG00000105518	0.871077	7.79872e-84	2.73177e-82	TMEM205
ENSG00000171132	-2.38437	2.09198e-195	2.11052e-193	PRKCE
ENSG00000161654	-0.717434	2.07898e-54	4.63654e-53	LSM12
ENSG00000106078	-0.623875	3.15544e-17	2.83467e-16	COBL
ENSG00000138606	-0.995251	7.72358e-07	3.82365e-06	SHF
ENSG00000162009	-1.49291	1.09407e-06	5.33591e-06	SSTR5
ENSG00000134901	2.59368	4.91311e-47	9.68719e-46	KDELC1
ENSG00000108840	-0.891531	7.18406e-51	1.52356e-49	HDAC5
ENSG00000167644	1.07764	3.81854e-62	9.63098e-61	C19orf33
ENSG00000114796	-0.691057	3.26619e-21	3.43154e-20	KLHL24
ENSG00000183434	1.66974	6.01447e-06	2.74274e-05	TFDP3
ENSG00000184489	-0.802033	3.62841e-13	2.68861e-12	PTP4A3
ENSG00000189431	-3.7688	2.13702e-21	2.25781e-20	RASSF10
ENSG00000089157	0.62615	1.72784e-92	6.57052e-91	RPLP0
ENSG00000135074	-1.68546	1.20461e-21	1.28459e-20	ADAM19
ENSG00000120318	-1.57009	5.72337e-05	0.000237435	ARAP3
ENSG00000075420	-0.819174	5.39231e-49	1.1083e-47	FNDC3B
ENSG00000131389	-2.4799	7.52629e-162	5.73091e-160	SLC6A6
ENSG00000074527	5.35102	0	0	NTN4
ENSG00000107954	-1.71658	1.93806e-70	5.49478e-69	NEURL1
ENSG00000249267	0.793064	2.21949e-08	1.24137e-07	LINC00939
ENSG00000135547	-2.87429	9.79758e-211	1.09176e-208	HEY2
ENSG00000137501	-1.32722	2.64674e-59	6.42227e-58	SYTL2
ENSG00000118160	-3.63994	1.22075e-132	7.31104e-131	SLC8A2
ENSG00000135596	-1.35829	2.53582e-64	6.5987e-63	MICAL1
ENSG00000088836	0.701449	1.18525e-07	6.24267e-07	SLC4A11
ENSG00000057294	0.958305	3.63458e-37	5.91539e-36	PKP2
ENSG00000008300	-1.45456	3.61132e-275	5.4997e-273	CELSR3
ENSG00000182979	-0.625768	1.45817e-38	2.44284e-37	MTA1
ENSG00000198848	2.59771	4.15695e-19	4.02858e-18	CES1
ENSG00000088726	2.10916	1.08678e-48	2.21802e-47	TMEM40
ENSG00000101187	-1.42788	4.04293e-09	2.38072e-08	SLCO4A1
ENSG00000135114	1.09925	4.0712e-10	2.561e-09	OASL
ENSG00000074416	0.61017	3.56408e-59	8.622e-58	MGLL
ENSG00000167601	-1.66037	1.3379e-25	1.62073e-24	AXL
ENSG00000173681	0.703254	6.19663e-41	1.0847e-39	CXorf23
ENSG00000149809	0.602738	2.00107e-24	2.33478e-23	TM7SF2
ENSG00000160097	-1.28525	9.55127e-05	0.000385729	FNDC5
ENSG00000102362	0.929389	4.60187e-26	5.65612e-25	SYTL4
ENSG00000242759	-0.738984	5.84324e-05	0.000242126	LINC00882
ENSG00000164548	-0.663728	1.7309e-06	8.30046e-06	TRA2A
ENSG00000152256	0.750049	2.58698e-26	3.19561e-25	PDK1
ENSG00000003989	0.824664	8.2664e-23	9.16988e-22	SLC7A2
ENSG00000117528	0.605646	1.91953e-71	5.50076e-70	ABCD3
ENSG00000162976	1.33299	4.05204e-43	7.40929e-42	PQLC3
ENSG00000024422	1.04577	1.67353e-25	2.01966e-24	EHD2
ENSG00000170379	-1.11125	9.73653e-74	2.88052e-72	TCAF2
ENSG00000116731	1.0254	8.51798e-28	1.09535e-26	PRDM2
ENSG00000103540	-0.697452	2.69346e-57	6.35248e-56	CCP110
ENSG00000164099	0.745265	4.42901e-05	0.000186202	PRSS12
ENSG00000137628	-0.712692	2.74913e-23	3.09359e-22	DDX60
ENSG00000100167	-2.32379	9.23791e-167	7.42306e-165	2017-09-03
ENSG00000095380	1.19594	1.4002e-163	1.08689e-161	NANS
ENSG00000198720	-2.25504	1.81777e-94	7.0809e-93	ANKRD13B
ENSG00000167619	-2.91959	2.38665e-64	6.21559e-63	TMEM145
ENSG00000177181	-1.77744	1.14166e-173	9.71046e-172	RIMKLA
ENSG00000066248	-2.34606	2.17623e-29	2.93416e-28	NGEF
ENSG00000056487	-5.0776	5.82753e-195	5.8607e-193	PHF21B
ENSG00000239713	-1.12067	8.73294e-17	7.69177e-16	APOBEC3G
ENSG00000166927	0.854961	1.7565e-49	3.64533e-48	MS4A7
ENSG00000158321	3.13919	3.18191e-64	8.27322e-63	AUTS2
ENSG00000187838	-0.619503	0.000202456	0.000786535	TMEM256-PLSCR3
ENSG00000185043	0.710974	1.26975e-34	1.95418e-33	CIB1
ENSG00000115526	-1.04451	8.72664e-30	1.18912e-28	CHST10
ENSG00000116285	-0.755173	1.0213e-44	1.91905e-43	ERRFI1
ENSG00000108379	-1.91184	2.00345e-27	2.54964e-26	WNT3
ENSG00000057252	0.624038	2.93609e-52	6.34454e-51	SOAT1
ENSG00000174827	-1.69213	1.70839e-43	3.14904e-42	PDZK1
ENSG00000101096	-2.27838	4.54758e-09	2.66708e-08	NFATC2
ENSG00000102038	1.88392	4.87408e-11	3.22862e-10	SMARCA1
ENSG00000082438	1.37776	3.60792e-158	2.68963e-156	COBLL1
ENSG00000145284	-0.956284	7.0044e-123	3.79031e-121	SCD5
ENSG00000166140	0.804189	1.31773e-60	3.24921e-59	ZFYVE19
ENSG00000280800	-1.36418	0.000204511	0.000793842	CH507-513H4.6
ENSG00000057019	1.36987	2.75453e-152	1.94037e-150	DCBLD2
ENSG00000138622	-0.999875	7.80914e-20	7.80694e-19	HCN4
ENSG00000151500	-0.676347	2.29611e-12	1.62928e-11	THYN1
ENSG00000035681	2.02236	2.04793e-168	1.67936e-166	NSMAF
ENSG00000131080	-1.57531	7.86712e-08	4.21015e-07	EDA2R
ENSG00000136274	-2.0789	7.06512e-09	4.07925e-08	NACAD
ENSG00000188042	-0.887762	1.81655e-24	2.12258e-23	ARL4C
ENSG00000159921	0.863654	3.94257e-75	1.19514e-73	GNE
ENSG00000100604	-1.7459	4.39429e-06	2.03348e-05	CHGA
ENSG00000165061	-2.16948	2.04605e-73	6.03085e-72	ZMAT4
ENSG00000167785	0.608523	6.27743e-28	8.10818e-27	ZNF558
ENSG00000110925	-0.717516	1.68006e-49	3.48896e-48	CSRNP2
ENSG00000174721	-0.632157	1.07231e-05	4.78159e-05	FGFBP3
ENSG00000128564	-3.44416	2.21925e-51	4.74108e-50	VGF
ENSG00000137269	-1.007	7.76919e-116	3.84623e-114	LRRC1
ENSG00000063660	-0.965631	2.96005e-77	9.33583e-76	GPC1
ENSG00000100422	-2.54831	1.04261e-122	5.6134e-121	CERK
ENSG00000258947	-3.0311	0	0	TUBB3
ENSG00000134240	4.07578	0	0	HMGCS2
ENSG00000179546	2.20065	3.91872e-78	1.25828e-76	HTR1D
ENSG00000100596	1.41682	0	0	SPTLC2
ENSG00000162373	-1.28551	3.54904e-07	1.79961e-06	BEND5
ENSG00000156925	-1.29054	2.60148e-09	1.55452e-08	ZIC3
ENSG00000103855	-0.72059	1.26792e-66	3.41613e-65	CD276
ENSG00000150787	-0.726174	7.82554e-19	7.52687e-18	PTS
ENSG00000196586	1.15365	2.46046e-92	9.34535e-91	MYO6
ENSG00000054277	1.96265	6.80353e-203	7.2287e-201	OPN3
ENSG00000258499	-4.12001	2.47836e-32	3.61424e-31	RP11-862G15.2
ENSG00000095002	-0.608415	2.38975e-50	5.03138e-49	MSH2
ENSG00000099219	0.724423	1.7665e-101	7.46293e-100	ERMP1
ENSG00000133321	-1.02884	1.01536e-27	1.30097e-26	RARRES3
ENSG00000171798	-1.47774	1.20683e-25	1.46473e-24	KNDC1
ENSG00000141577	-0.759376	4.82265e-34	7.33744e-33	CEP131
ENSG00000128536	-1.04662	3.42268e-25	4.08588e-24	CDHR3
ENSG00000124490	2.00711	2.56896e-08	1.43008e-07	CRISP2
ENSG00000147642	4.13556	6.8481e-75	2.06807e-73	SYBU
ENSG00000107819	-0.702135	9.3837e-38	1.54372e-36	SFXN3
ENSG00000179918	0.688745	1.6609e-17	1.50644e-16	SEPHS2
ENSG00000167100	-1.2377	1.98771e-14	1.56419e-13	SAMD14
ENSG00000067715	1.64126	1.16371e-198	1.19284e-196	SYT1
ENSG00000239521	-0.822534	1.15312e-33	1.73706e-32	GATS
ENSG00000099284	-2.01383	1.97239e-161	1.49831e-159	H2AFY2
ENSG00000085377	-0.76797	1.50155e-52	3.25125e-51	PREP
ENSG00000091592	-1.18055	1.26073e-14	1.00172e-13	NLRP1
ENSG00000005961	-1.33696	1.74461e-14	1.37764e-13	ITGA2B
ENSG00000134318	0.742171	2.5549e-131	1.50475e-129	ROCK2
ENSG00000105929	4.51316	1.72512e-76	5.37729e-75	ATP6V0A4
ENSG00000090932	-1.36382	2.45236e-21	2.585e-20	DLL3
ENSG00000168675	-3.0234	1.152e-266	1.70566e-264	LDLRAD4
ENSG00000077327	-4.76716	1.20086e-43	2.22121e-42	SPAG6
ENSG00000204618	1.02566	2.98746e-09	1.77488e-08	RNF39
ENSG00000166840	0.746135	4.70059e-25	5.58224e-24	GLYATL1
ENSG00000147604	0.72281	2.64946e-186	2.48482e-184	RPL7
ENSG00000115221	2.70912	3.24358e-34	4.95382e-33	ITGB6
ENSG00000046604	-3.34909	1.13832e-298	2.03377e-296	DSG2
ENSG00000277301	-1.39512	4.2909e-09	2.5221e-08	RP5-1184F4.7
ENSG00000123358	-0.621688	0.000102292	0.000411602	NR4A1
ENSG00000164647	3.59262	4.92881e-64	1.27531e-62	STEAP1
ENSG00000169908	-3.82732	0	0	TM4SF1
ENSG00000041982	-2.74159	4.80605e-297	8.39902e-295	TNC
ENSG00000136153	1.78371	5.39927e-192	5.29675e-190	LMO7
ENSG00000006432	0.58636	3.9663e-49	8.16781e-48	MAP3K9
ENSG00000075643	-0.997482	2.29552e-06	1.08825e-05	MOCOS
ENSG00000156687	-6.00511	3.69804e-141	2.37484e-139	UNC5D
ENSG00000169435	0.818705	1.73597e-22	1.90653e-21	RASSF6
ENSG00000076641	-1.64156	1.70981e-145	1.13212e-143	PAG1
ENSG00000004838	-0.966764	8.34575e-12	5.7498e-11	ZMYND10
ENSG00000258676	1.02243	2.76664e-05	0.000118638	RP11-386M24.3
ENSG00000148700	-1.43508	1.76536e-147	1.1911e-145	ADD3
ENSG00000095739	-1.13345	3.87027e-146	2.57865e-144	BAMBI
ENSG00000036672	-1.812	2.22116e-06	1.05503e-05	USP2
ENSG00000139370	0.754192	1.11132e-31	1.59448e-30	SLC15A4
ENSG00000134824	-5.03481	0	0	FADS2
ENSG00000205090	-1.33372	9.12194e-05	0.000369745	TMEM240
ENSG00000109452	0.585729	8.18556e-33	1.21027e-31	INPP4B
ENSG00000019144	-1.32314	1.80432e-94	7.03708e-93	PHLDB1
ENSG00000166949	-1.36262	9.52401e-102	4.04498e-100	SMAD3
ENSG00000106617	-0.692358	1.62351e-17	1.47337e-16	PRKAG2
ENSG00000130066	1.76298	0	0	SAT1
ENSG00000213801	0.864443	3.10406e-26	3.82546e-25	ZNF321P
ENSG00000013392	0.933616	6.84239e-26	8.36812e-25	RWDD2A
ENSG00000106565	1.38553	1.43809e-208	1.57505e-206	TMEM176B
ENSG00000134138	2.40996	1.38144e-64	3.62427e-63	MEIS2
ENSG00000038002	1.15807	8.56312e-30	1.16783e-28	AGA
ENSG00000082458	1.02678	8.0206e-296	1.39406e-293	DLG3
ENSG00000147257	1.74459	0	0	GPC3
ENSG00000148516	-1.06677	6.4239e-07	3.20004e-06	ZEB1
ENSG00000141540	2.29669	3.93371e-47	7.77527e-46	TTYH2
ENSG00000029534	-2.20224	5.92504e-279	9.19849e-277	ANK1
ENSG00000261068	1.16377	1.31252e-07	6.88917e-07	RP11-7K24.3
ENSG00000029153	4.08875	0	0	ARNTL2
ENSG00000122035	-0.61908	2.70935e-05	0.000116337	RASL11A
ENSG00000076344	-2.96436	1.92926e-97	7.78052e-96	RGS11
ENSG00000074621	0.589508	5.03073e-19	4.86801e-18	SLC24A1
ENSG00000184005	-1.94901	5.3847e-18	4.99733e-17	ST6GALNAC3
ENSG00000059377	2.88309	8.14336e-232	1.01732e-229	TBXAS1
ENSG00000137693	-0.683728	3.67647e-32	5.33471e-31	YAP1
ENSG00000176887	2.77788	4.92084e-69	1.36846e-67	SOX11
ENSG00000138735	0.755384	1.23988e-55	2.82829e-54	PDE5A
ENSG00000105388	5.73461	0	0	CEACAM5
ENSG00000058063	3.12379	1.22946e-80	4.08727e-79	ATP11B
ENSG00000108309	-4.0952	0	0	RUNDC3A
ENSG00000101298	2.48183	1.79639e-14	1.41713e-13	SNPH
ENSG00000124224	1.87861	9.37401e-22	1.00466e-20	PPP4R1L
ENSG00000126353	1.17769	2.0523e-07	1.06205e-06	CCR7
ENSG00000026508	-2.61336	1.33723e-48	2.72394e-47	CD44
ENSG00000026297	1.90439	6.97014e-232	8.74165e-230	RNASET2
ENSG00000110080	0.675711	3.12454e-27	3.95433e-26	ST3GAL4
ENSG00000153563	1.35327	6.81465e-12	4.72241e-11	CD8A
ENSG00000106077	0.69319	2.03644e-35	3.19253e-34	ABHD11
ENSG00000039523	-0.880374	2.79596e-07	1.4316e-06	FAM65A
ENSG00000120306	1.55632	1.27732e-78	4.15141e-77	CYSTM1
ENSG00000234076	-1.41325	0.000247281	0.000950516	TPRG1-AS1
ENSG00000167311	-2.43686	5.92613e-13	4.3409e-12	ART5
ENSG00000140945	0.748465	8.67942e-06	3.90129e-05	CDH13
ENSG00000100092	-0.849463	3.59421e-18	3.36692e-17	SH3BP1
ENSG00000184368	-2.38553	8.61631e-47	1.69054e-45	MAP7D2
ENSG00000087074	-0.653465	8.05591e-14	6.16502e-13	PPP1R15A
ENSG00000103528	1.77642	9.86967e-113	4.7465e-111	SYT17
ENSG00000124713	0.78926	2.8225e-07	1.44473e-06	GNMT
ENSG00000025039	3.39836	1.14996e-159	8.67381e-158	RRAGD
ENSG00000130164	0.629835	3.41311e-67	9.27397e-66	LDLR
ENSG00000146197	-1.12372	2.92473e-35	4.55828e-34	SCUBE3
ENSG00000117009	3.20121	2.15667e-103	9.24562e-102	KMO
ENSG00000101188	1.73274	1.56391e-05	6.87117e-05	NTSR1
ENSG00000132698	0.663082	1.56009e-37	2.56126e-36	RAB25
ENSG00000070718	-0.621458	2.04464e-22	2.2409e-21	AP3M2
ENSG00000174749	0.908264	5.64916e-231	7.0298e-229	C4orf32
ENSG00000026652	-0.939484	1.13426e-10	7.36242e-10	AGPAT4
ENSG00000116141	5.47211	8.94907e-99	3.66453e-97	MARK1
ENSG00000161634	4.84964	4.34883e-91	1.63239e-89	DCD
ENSG00000128298	3.68558	6.20647e-96	2.45351e-94	BAIAP2L2
ENSG00000272944	-1.89734	1.92873e-06	9.21327e-06	CTD-2308L22.1
ENSG00000153404	-3.27882	3.45178e-67	9.36314e-66	PLEKHG4B
ENSG00000021826	3.1734	0	0	CPS1
ENSG00000060762	1.0225	1.02991e-76	3.22284e-75	MPC1
ENSG00000178531	-1.01178	9.80464e-20	9.77134e-19	CTXN1
ENSG00000099617	-2.73275	1.63454e-15	1.36096e-14	EFNA2
ENSG00000175356	2.15591	0	0	SCUBE2
ENSG00000084774	0.630522	3.78199e-64	9.81753e-63	CAD
ENSG00000167771	-1.83056	7.90926e-25	9.33036e-24	RCOR2
ENSG00000119979	0.703937	1.52572e-56	3.54866e-55	FAM45A
ENSG00000102547	-0.850571	1.40467e-26	1.7507e-25	CAB39L
ENSG00000008283	0.866965	4.55123e-136	2.8099e-134	CYB561
ENSG00000101574	-0.639242	4.99522e-12	3.48576e-11	METTL4
ENSG00000109323	-0.660256	2.363e-16	2.0397e-15	MANBA
ENSG00000104064	-0.622819	6.11431e-42	1.09241e-40	GABPB1
ENSG00000154930	0.915454	2.09511e-33	3.14276e-32	ACSS1
ENSG00000188306	2.04367	9.98425e-08	5.29618e-07	LRRIQ4
ENSG00000125827	0.668095	9.93361e-43	1.80299e-41	TMX4
ENSG00000091317	-0.711921	3.83559e-47	7.58602e-46	CMTM6
ENSG00000106852	-1.34238	2.81618e-32	4.09942e-31	LHX6
ENSG00000184937	-1.03729	5.34587e-29	7.11471e-28	WT1
ENSG00000125814	-2.52291	0	0	NAPB
ENSG00000175745	-1.613	5.16688e-10	3.22928e-09	NR2F1
ENSG00000074181	-0.85499	2.25193e-41	3.97017e-40	NOTCH3
ENSG00000165309	-1.36324	0.000153783	0.000605979	ARMC3
ENSG00000141756	0.752058	1.24683e-75	3.81214e-74	FKBP10
ENSG00000055118	-1.21123	3.87535e-51	8.246e-50	KCNH2
ENSG00000126878	-1.19929	2.14078e-118	1.09368e-116	AIF1L
ENSG00000111199	-1.09971	6.71901e-16	5.68467e-15	TRPV4
ENSG00000138030	0.614421	3.21765e-20	3.26248e-19	KHK
ENSG00000132026	-3.30419	2.20739e-70	6.25282e-69	RTBDN
ENSG00000165259	1.13211	8.04892e-11	5.27052e-10	HDX
ENSG00000107130	-3.33939	0	0	NCS1
ENSG00000138709	0.63155	4.24327e-54	9.4043e-53	LARP1B
ENSG00000166268	1.00818	1.01826e-06	4.97857e-06	MYRFL
ENSG00000070669	0.827631	2.14119e-50	4.51399e-49	ASNS
ENSG00000111110	-0.888281	1.55262e-111	7.37806e-110	PPM1H
ENSG00000228288	1.08509	9.389e-08	4.98787e-07	PCAT6
ENSG00000113140	-4.45215	1.70907e-77	5.41165e-76	SPARC
ENSG00000134107	1.20669	1.02016e-122	5.50179e-121	BHLHE40
ENSG00000049192	-1.51904	6.9891e-10	4.33932e-09	ADAMTS6
ENSG00000116883	1.17821	6.9343e-18	6.40201e-17	RP11-268J15.5
ENSG00000109625	-3.2079	1.93132e-17	1.74825e-16	CPZ
ENSG00000164061	-2.52865	8.80676e-110	4.11767e-108	BSN
ENSG00000106089	-0.869138	5.11161e-08	2.77687e-07	STX1A
ENSG00000103310	1.78013	5.49171e-08	2.97477e-07	ZP2
ENSG00000203972	3.45213	1.68505e-23	1.9076e-22	GLYATL3
ENSG00000243811	-0.949264	1.81961e-12	1.29692e-11	APOBEC3D
ENSG00000231389	3.66508	1.48215e-52	3.21273e-51	HLA-DPA1
ENSG00000095321	1.47354	7.88186e-74	2.33398e-72	CRAT
ENSG00000101474	0.606528	9.38678e-82	3.17335e-80	APMAP
ENSG00000174939	-1.92744	2.18187e-56	5.05641e-55	ASPHD1
ENSG00000148357	-4.30102	1.84687e-67	5.04396e-66	HMCN2
ENSG00000149485	-4.52162	0	0	FADS1
ENSG00000244384	0.944644	3.03194e-05	0.000129269	RN7SL359P
ENSG00000108176	1.17122	6.02634e-23	6.71527e-22	DNAJC12
ENSG00000072182	0.998451	2.17212e-05	9.40899e-05	ASIC4
ENSG00000166971	0.727276	2.24246e-31	3.19448e-30	AKTIP
ENSG00000158186	-0.984628	5.095e-46	9.85742e-45	MRAS
ENSG00000187840	0.627375	9.66994e-54	2.12692e-52	EIF4EBP1
ENSG00000023839	1.09799	1.66528e-07	8.67948e-07	ABCC2
ENSG00000198246	-0.795686	3.34788e-16	2.8697e-15	SLC29A3
ENSG00000196684	1.95786	2.28485e-28	2.98618e-27	HSH2D
ENSG00000250565	-2.17093	1.64818e-31	2.35525e-30	ATP6V1E2
ENSG00000267270	-0.594828	2.27527e-06	1.07928e-05	PARD6G-AS1
ENSG00000099864	-1.36125	2.2422e-70	6.34583e-69	PALM
ENSG00000106772	-3.01885	2.64628e-88	9.68314e-87	PRUNE2
ENSG00000111331	3.87534	9.18558e-78	2.92594e-76	OAS3
ENSG00000116819	-1.08571	2.18037e-05	9.44217e-05	TFAP2E
ENSG00000116679	-0.691219	4.84407e-77	1.52329e-75	IVNS1ABP
ENSG00000272438	-3.05455	2.82242e-15	2.3216e-14	RP11-54O7.16
ENSG00000102780	-0.601892	1.28811e-11	8.77797e-11	DGKH
ENSG00000160336	0.719598	5.26172e-53	1.14629e-51	ZNF761
ENSG00000153898	1.16508	1.11954e-14	8.91533e-14	MCOLN2
ENSG00000125966	-2.80623	1.89415e-80	6.27138e-79	MMP24
ENSG00000135100	2.22642	9.36167e-77	2.93525e-75	HNF1A
ENSG00000171428	0.668589	6.79823e-09	3.9287e-08	NAT1
ENSG00000119681	-1.50809	1.72662e-59	4.19917e-58	LTBP2
ENSG00000086544	0.965282	2.58585e-59	6.27927e-58	ITPKC
ENSG00000110108	0.749863	8.90049e-63	2.26089e-61	TMEM109
ENSG00000186787	0.632249	5.4899e-13	4.02874e-12	SPIN2B
ENSG00000084628	-3.68027	9.58791e-238	1.24142e-235	NKAIN1
ENSG00000127528	1.77622	8.76225e-64	2.25443e-62	KLF2
ENSG00000134109	1.02297	8.57647e-108	3.89608e-106	EDEM1
ENSG00000076356	0.623404	1.1863e-15	9.93432e-15	PLXNA2
ENSG00000132109	1.08786	1.05662e-36	1.70494e-35	TRIM21
ENSG00000004139	-1.97758	6.67975e-152	4.68476e-150	SARM1
ENSG00000170365	-0.620949	3.59153e-18	3.36538e-17	SMAD1
ENSG00000229453	3.64076	7.6529e-54	1.69024e-52	SPINK8
ENSG00000005059	-4.2639	0	0	CCDC109B
ENSG00000134897	2.33797	9.84273e-140	6.20868e-138	BIVM
ENSG00000122786	-2.86036	2.14319e-33	3.21337e-32	CALD1
ENSG00000113719	2.24933	0	0	ERGIC1
ENSG00000225345	1.5051	7.37369e-16	6.2254e-15	SNX18P3
ENSG00000131711	-2.41369	2.01429e-99	8.30144e-98	MAP1B
ENSG00000215915	0.75948	4.11964e-08	2.25329e-07	ATAD3C
ENSG00000101413	-0.674968	6.76944e-56	1.55415e-54	RPRD1B
ENSG00000255145	1.361	2.10853e-07	1.08956e-06	STX17-AS1
ENSG00000160255	0.729229	4.2596e-05	0.000179387	ITGB2
ENSG00000095397	-0.734204	4.79702e-17	4.27932e-16	DFNB31
ENSG00000165912	3.93045	4.32683e-174	3.6999e-172	PACSIN3
ENSG00000089006	0.713277	6.75696e-99	2.77044e-97	SNX5
ENSG00000107798	1.03685	1.07816e-124	5.91436e-123	LIPA
ENSG00000069849	0.986853	3.44666e-67	9.35719e-66	ATP1B3
ENSG00000108830	-1.40653	2.51635e-35	3.92946e-34	RND2
ENSG00000010810	-3.63933	7.14693e-118	3.62803e-116	FYN
ENSG00000006071	-1.91098	3.23521e-220	3.87511e-218	ABCC8
ENSG00000129295	-0.632127	6.66441e-06	3.02662e-05	LRRC6
ENSG00000087258	-2.56266	9.65978e-62	2.42108e-60	GNAO1
ENSG00000249242	-1.64842	0	0	TMEM150C
ENSG00000007968	-0.785696	1.87103e-44	3.50542e-43	E2F2
ENSG00000243232	-1.52335	2.15882e-11	1.45534e-10	PCDHAC2
ENSG00000073712	1.44644	1.62766e-145	1.07996e-143	FERMT2
ENSG00000181826	-0.767951	1.09059e-58	2.61848e-57	RELL1
ENSG00000134072	-0.783536	3.22929e-07	1.64217e-06	CAMK1
ENSG00000188404	1.27198	6.72516e-10	4.18113e-09	SELL
ENSG00000169519	1.11066	9.8115e-119	5.04472e-117	METTL15
ENSG00000152503	-0.869357	1.34677e-22	1.48265e-21	TRIM36
ENSG00000262152	1.3001	3.88334e-20	3.92024e-19	LA16c-380H5.1
ENSG00000051128	-0.751585	3.41651e-28	4.4398e-27	HOMER3
ENSG00000134323	2.8282	0	0	MYCN
ENSG00000169896	2.66209	7.82462e-38	1.29056e-36	ITGAM
ENSG00000188191	0.665541	1.35663e-21	1.44285e-20	PRKAR1B
ENSG00000055732	1.42755	6.19479e-83	2.13948e-81	MCOLN3
ENSG00000104856	-0.615836	3.17856e-12	2.24104e-11	RELB
ENSG00000134184	1.25531	1.45231e-120	7.6518e-119	GSTM1
ENSG00000066322	0.596286	2.08189e-28	2.72537e-27	ELOVL1
ENSG00000132541	1.02816	1.95705e-50	4.13397e-49	HRSP12
ENSG00000073670	-1.03928	1.14321e-12	8.23073e-12	ADAM11
ENSG00000005249	-1.0991	1.36527e-194	1.36021e-192	PRKAR2B
ENSG00000154198	2.32301	9.10963e-283	1.464e-280	CYP4Z2P
ENSG00000043039	-1.29903	2.33211e-10	1.4881e-09	BARX2
ENSG00000152669	-1.16889	1.4268e-28	1.87857e-27	CCNO
ENSG00000131067	-1.26762	2.25989e-25	2.71298e-24	GGT7
ENSG00000139219	-1.94499	3.90146e-48	7.87705e-47	COL2A1
ENSG00000132470	1.62914	3.10605e-38	5.1656e-37	ITGB4
ENSG00000133169	-1.73367	0	0	BEX1
ENSG00000105880	-4.11733	1.98096e-36	3.18357e-35	DLX5
ENSG00000103888	-1.59663	4.23487e-36	6.74816e-35	CEMIP
ENSG00000225173	1.60663	4.54138e-06	2.09942e-05	XXbac-BPG308K3.5
ENSG00000005187	3.19373	0	0	ACSM3
ENSG00000052795	1.15356	5.63286e-108	2.56616e-106	FNIP2
ENSG00000089163	0.968641	3.3305e-06	1.55789e-05	SIRT4
ENSG00000100994	0.872331	1.45859e-120	7.67223e-119	PYGB
ENSG00000077782	-1.07284	2.65681e-272	4.0079e-270	FGFR1
ENSG00000099250	2.56751	4.64941e-103	1.98522e-101	NRP1
ENSG00000077238	0.687899	7.31906e-15	5.8945e-14	IL4R
ENSG00000144730	1.23013	4.06256e-31	5.76163e-30	IL17RD
ENSG00000116544	-2.0202	1.29021e-62	3.27219e-61	DLGAP3
ENSG00000196735	1.20912	1.28209e-18	1.22359e-17	HLA-DQA1
ENSG00000117151	1.33364	2.49423e-87	9.05427e-86	CTBS
ENSG00000136026	1.22616	7.81706e-213	8.86516e-211	CKAP4
ENSG00000182983	3.53862	1.51639e-154	1.08735e-152	ZNF662
ENSG00000092531	0.616338	3.39706e-48	6.86734e-47	SNAP23
ENSG00000006377	-2.889	2.28487e-14	1.79363e-13	DLX6
ENSG00000008277	-1.53527	4.06061e-184	3.73168e-182	ADAM22
ENSG00000030110	0.643217	5.57625e-30	7.65382e-29	BAK1
ENSG00000105549	-4.63716	4.22335e-33	6.29682e-32	THEG
ENSG00000177119	-0.700093	9.44811e-85	3.35361e-83	ANO6
[truncated: 1,977 more rows]

## Sheet: MM134 LTED-D DE genes
	log2FoldChange	p-value	adjusted p-value	gene_symbol
ENSG00000281909	1.15915	0.000157526	0.000572028	RP11-439M15.1
ENSG00000281406	-2.6477	1.69823e-11	1.02146e-10	BLACAT1
ENSG00000281005	0.586962	1.20003e-05	4.87094e-05	LINC00921
ENSG00000280389	1.73333	1.27424e-15	9.30398e-15	RP11-512M8.11
ENSG00000280355	-0.640195	3.91412e-05	0.000151408	RP11-119F19.5
ENSG00000280339	-1.29972	1.5396e-08	7.81678e-08	RP11-736K20.4
ENSG00000280287	0.612324	0.000228098	0.000813607	RP13-554M15.7
ENSG00000280237	-1.20803	9.54141e-09	4.91216e-08	MIR4697HG
ENSG00000280222	-1.51217	0.000140928	0.00051362	RP11-174G17.3
ENSG00000280217	2.55026	1.44402e-37	2.0709e-36	RP11-638F5.2
ENSG00000280206	0.780635	5.52198e-10	3.05798e-09	CTB-193M12.5
ENSG00000280055	-2.07585	2.602e-07	1.21181e-06	TMEM75
ENSG00000280043	1.51067	7.06445e-09	3.66647e-08	RP11-1281K21.8
ENSG00000279821	-0.828966	5.6829e-05	0.000216466	RP11-1334A24.5
ENSG00000281881	1.32559	2.64843e-09	1.4079e-08	SPRY4-IT1
ENSG00000279713	-2.13675	1.21677e-07	5.8158e-07	CTD-3035K23.3
ENSG00000279708	-1.73464	2.51772e-06	1.08678e-05	CTD-2335A18.2
ENSG00000279487	2.43317	9.724e-10	5.30688e-09	AC234582.1
ENSG00000279377	-1.46307	5.81063e-18	4.64923e-17	AC003973.3
ENSG00000279303	-0.887844	2.79644e-07	1.29971e-06	CH507-236L23.3
ENSG00000279186	-0.887844	2.79644e-07	1.29971e-06	CH507-39O4.3
ENSG00000278971	4.39945	1.47511e-42	2.3576e-41	RP11-644A7.2
ENSG00000278962	-2.35353	1.45135e-09	7.83653e-09	RP11-399B17.1
ENSG00000278948	-1.8477	5.09476e-23	4.88123e-22	RP5-1039K5.12
ENSG00000278912	-2.16807	3.52937e-08	1.74807e-07	CTD-2196E14.8
ENSG00000278882	0.925838	2.26579e-06	9.81871e-06	AC253572.1
ENSG00000278817	1.07346	2.14019e-36	2.97589e-35	AC007325.4
ENSG00000278743	1.28096	1.11901e-07	5.36618e-07	RP11-707G18.1
ENSG00000278540	0.857034	4.80376e-172	3.71983e-170	ACACA
ENSG00000278291	0.621936	2.50047e-07	1.16622e-06	RP11-172H24.4
ENSG00000278231	-1.55969	6.56396e-05	0.000248047	RP5-906C1.1
ENSG00000278200	-2.36987	5.02517e-11	2.95695e-10	RP13-766D20.4
ENSG00000278133	0.611914	3.80973e-10	2.12857e-09	RP11-196G11.5
ENSG00000277877	0.854757	0.000218832	0.000782215	RP11-11N7.5
ENSG00000277701	-1.2887	1.46084e-15	1.06397e-14	RP11-734K23.9
ENSG00000279390	-0.661795	0.000115979	0.000427219	AF127577.13
ENSG00000277232	-0.920753	1.1728e-10	6.76173e-10	GTSE1-AS1
ENSG00000277200	-1.76824	1.83636e-21	1.66748e-20	RP11-74E22.8
ENSG00000276888	2.33021	2.56807e-12	1.61323e-11	RP11-244H18.1
ENSG00000276728	-0.642436	0.000193196	0.000695006	AC142472.6
ENSG00000279512	-1.54595	2.93761e-06	1.258e-05	RP11-575M22.1
ENSG00000276649	1.98075	6.39981e-07	2.90027e-06	RP5-858L17.1
ENSG00000276345	0.722428	6.90189e-42	1.08573e-40	AC004556.1
ENSG00000279174	1.7112	1.61814e-06	7.10555e-06	RP11-1099M24.9
ENSG00000276216	0.873862	5.64996e-33	7.196e-32	CH17-373J23.1
ENSG00000276168	0.76163	1.04574e-12	6.69815e-12	RN7SL1
ENSG00000276045	0.765507	5.24595e-27	5.72596e-26	ORAI1
ENSG00000275993	-1.25329	2.97555e-27	3.27014e-26	CH507-42P11.8
ENSG00000275902	-1.29903	4.11759e-05	0.000158963	RP13-1032I1.11
ENSG00000275395	3.35311	6.15326e-132	3.39875e-130	FCGBP
ENSG00000274897	2.55381	6.47994e-86	2.0954e-84	PANO1
ENSG00000274767	-1.01383	2.73317e-27	3.0079e-26	AC131056.3
ENSG00000274560	1.58169	6.37634e-07	2.89005e-06	RP11-285E23.2
ENSG00000274180	-0.847762	8.32226e-10	4.55977e-09	NATD1
ENSG00000274012	0.84957	5.89586e-20	5.10023e-19	Metazoa_SRP
ENSG00000273706	-1.77777	6.61808e-50	1.22413e-48	LHX1
ENSG00000273456	-1.10118	5.98015e-09	3.11585e-08	RP11-686O6.2
ENSG00000273373	-1.05742	1.35267e-10	7.761e-10	RP5-1074L1.4
ENSG00000273340	-1.80177	6.03762e-06	2.51746e-05	MICE
ENSG00000273320	0.667778	2.53928e-05	0.000100159	RP11-22N19.2
ENSG00000273291	-1.36676	1.96099e-07	9.22e-07	RP11-136C24.3
ENSG00000273259	3.40645	0	0	SERPINA3
ENSG00000273179	2.37188	1.73609e-10	9.90049e-10	RP11-20I20.4
ENSG00000273162	-0.723575	6.32277e-06	2.63121e-05	RP11-108L7.15
ENSG00000273143	-1.78416	4.80944e-06	2.02329e-05	RP11-525A16.4
ENSG00000273082	-1.59894	2.43727e-05	9.6325e-05	LL22NC03-32F9.1
ENSG00000273063	-1.12234	8.30067e-05	0.000310666	RP11-334G22.1
ENSG00000273015	-1.3106	7.4463e-82	2.2745e-80	RP11-352M15.2
ENSG00000273004	-1.33699	1.17496e-05	4.77403e-05	GS1-279B7.2
ENSG00000272872	2.26892	1.44013e-08	7.32572e-08	LL22NC03-N14H11.1
ENSG00000272870	-0.696757	2.98938e-05	0.000117103	RP11-798M19.6
ENSG00000272663	-0.801475	1.66484e-06	7.29858e-06	RP11-191L17.1
ENSG00000272568	-3.79925	4.55661e-63	1.06758e-61	CTB-113D17.1
ENSG00000272516	-5.85781	1.07376e-74	2.97316e-73	RP11-573G6.9
ENSG00000272485	-1.76201	1.96103e-08	9.87493e-08	RP11-284J1.1
ENSG00000272414	0.629705	7.30171e-19	6.05277e-18	FAM47E-STBD1
ENSG00000272412	0.723628	9.86738e-05	0.000366131	RN7SL778P
ENSG00000272398	0.598705	1.82456e-134	1.03828e-132	CD24
ENSG00000272366	-1.78794	4.6514e-06	1.95938e-05	RP11-573G6.10
ENSG00000272347	-1.53355	0.000113649	0.000419025	RP11-43F13.4
ENSG00000272341	0.762373	1.39287e-08	7.09206e-08	RP1-151F17.2
ENSG00000272301	-0.893579	2.13429e-10	1.2098e-09	RP11-111M22.4
ENSG00000272168	-1.91207	1.38236e-35	1.87566e-34	CASC15
ENSG00000272159	-0.85112	2.12841e-11	1.27517e-10	RP11-350N15.6
ENSG00000272108	-1.02592	8.41373e-07	3.78027e-06	AC005754.8
ENSG00000273008	-0.717964	8.22216e-05	0.000307835	RP11-351D16.3
ENSG00000271931	-1.54267	4.50606e-06	1.89966e-05	RP11-63L7.5
ENSG00000271824	1.48083	1.39849e-18	1.14621e-17	AC009014.3
ENSG00000271821	-1.48394	0.000210139	0.000752993	XXbac-BPG299F13.14
ENSG00000271698	-1.65004	7.47581e-07	3.3707e-06	GS1-393G12.13
ENSG00000271321	-1.84224	1.85479e-06	8.09252e-06	CTAGE6
ENSG00000271275	-1.80552	1.0209e-06	4.55425e-06	AC007326.9
ENSG00000271155	1.51275	9.46896e-05	0.000352083	RP11-435O5.5
ENSG00000271121	1.0519	3.54158e-44	5.8353e-43	NUDT4P2
ENSG00000271020	-0.836521	0.000269157	0.000952203	RP11-10C24.1
ENSG00000270964	-0.96057	2.40568e-10	1.36001e-09	RP11-502I4.3
ENSG00000270959	-1.63167	1.11213e-49	2.04525e-48	LPP-AS2
ENSG00000270933	1.44052	7.18868e-05	0.000270638	CTD-2227E11.1
ENSG00000270749	1.7494	1.18378e-05	4.80741e-05	RP11-368M16.10
ENSG00000270607	-1.21949	1.03206e-05	4.20786e-05	RP11-359E10.1
ENSG00000270571	-1.25277	7.84936e-05	0.000294671	RP11-355F16.1
ENSG00000274827	0.6032	7.35774e-07	3.31887e-06	LINC01297
ENSG00000270181	1.79988	4.312e-14	2.94222e-13	BIVM-ERCC5
ENSG00000270164	1.63624	8.8627e-10	4.84426e-09	LINC01480
ENSG00000270157	0.646522	9.59973e-08	4.62502e-07	RP5-894A10.6
ENSG00000272732	1.28255	5.6841e-07	2.58582e-06	RP5-1159O4.2
ENSG00000269911	-1.75613	4.14361e-09	2.18063e-08	RP1-172N19.5
ENSG00000269893	0.599503	1.04456e-15	7.65844e-15	SNHG8
ENSG00000269516	-1.2709	3.72552e-29	4.32e-28	CYP4F23P
ENSG00000275538	2.51059	1.3305e-17	1.0496e-16	RNVU1-19
ENSG00000268996	-0.619263	1.07399e-05	4.37434e-05	MAN1B1-AS1
ENSG00000282024	-1.14828	7.82414e-06	3.22995e-05	RP3-467D16.3
ENSG00000268654	-1.74585	4.95028e-06	2.07981e-05	MIMT1
ENSG00000268531	2.0702	7.52067e-10	4.12978e-09	RP11-32B5.8
ENSG00000279456	-1.10124	9.06593e-05	0.000337962	RP11-87H9.5
ENSG00000268355	2.04575	1.83816e-13	1.22039e-12	AC006129.1
ENSG00000268307	-1.17442	4.53488e-05	0.000174252	CTD-2619J13.13
ENSG00000267904	-0.789657	5.4013e-05	0.000206181	CTC-429P9.5
ENSG00000267882	-0.826606	8.85501e-05	0.000330407	RP4-569M23.5
ENSG00000267855	0.628839	9.7105e-37	1.36927e-35	NDUFA7
ENSG00000267751	0.769862	0.000103879	0.00038442	AC009005.2
ENSG00000267701	-1.89882	4.18769e-07	1.92092e-06	NA
ENSG00000267649	-1.35737	2.95051e-06	1.26336e-05	CTD-2587H24.10
ENSG00000267640	0.80737	9.34191e-06	3.8254e-05	CTD-2554C21.2
ENSG00000267424	-1.69616	7.51011e-06	3.10552e-05	CTD-2265O21.3
ENSG00000267322	-1.22679	3.49006e-40	5.28733e-39	SNHG22
ENSG00000267259	-0.615532	3.73998e-11	2.21661e-10	CTD-2008P7.9
ENSG00000267077	3.0215	1.38727e-23	1.35098e-22	RP11-127I20.5
ENSG00000267040	0.754421	0.000217317	0.000777232	RP11-35G9.3
ENSG00000267034	-2.59305	1.30097e-10	7.47372e-10	RP11-384O8.1
ENSG00000266992	1.97105	2.46307e-12	1.5491e-11	DHX40P1
ENSG00000266970	-1.37312	9.9818e-05	0.000370205	RP11-806H10.4
ENSG00000279508	4.21987	3.09942e-37	4.41526e-36	AL589743.1
ENSG00000266820	1.09486	5.09734e-05	0.000194904	RP13-104F24.1
ENSG00000277630	2.3582	4.39257e-17	3.4072e-16	BX072566.1
ENSG00000266028	-0.89671	1.74449e-46	3.00434e-45	SRGAP2
ENSG00000265766	4.81077	2.49588e-56	5.21024e-55	CXADRP3
ENSG00000265690	1.4998	4.85263e-05	0.000185881	RP11-5A19.5
ENSG00000282390	-1.93333	6.16877e-08	3.00783e-07	RP11-29A19.2
ENSG00000265263	-1.4409	0.000181591	0.000655322	RP11-135L13.4
ENSG00000264833	0.812479	0.00018954	0.00068262	RN7SL468P
ENSG00000277017	-0.863695	1.34579e-06	5.94552e-06	XXbac-B33L19.6
ENSG00000264813	1.74474	6.68442e-09	3.47319e-08	CTD-2501B8.1
ENSG00000264714	-2.22667	1.78353e-08	9.00808e-08	RP11-21G15.1
ENSG00000264364	-0.725268	1.51464e-41	2.35601e-40	DYNLL2
ENSG00000264357	1.3257	2.92424e-05	0.000114678	MIR4648
ENSG00000264222	1.92543	5.06214e-13	3.2925e-12	RP11-757O6.1
ENSG00000272047	0.702881	6.18628e-45	1.03475e-43	GTF2H5
ENSG00000263812	-1.32896	1.71689e-08	8.67836e-08	LINC00908
ENSG00000277147	-1.12431	1.06988e-12	6.84591e-12	LINC00869
ENSG00000263535	-0.84726	5.36499e-05	0.000204844	AK4P1
ENSG00000273032	-1.59732	2.15867e-08	1.08343e-07	DGCR9
ENSG00000263427	1.49739	2.87146e-05	0.000112677	RP11-599B13.3
ENSG00000263327	0.715979	2.8546e-05	0.000112098	TAPT1-AS1
ENSG00000263155	-2.53911	5.76149e-11	3.38026e-10	MYZAP
ENSG00000262728	-1.03571	0.000198669	0.00071357	RP11-1000B6.8
ENSG00000262601	1.37069	0.000253358	0.000899095	CTC-786C10.1
ENSG00000262420	0.760787	4.37256e-05	0.00016842	RP11-490O6.2
ENSG00000262209	1.53365	0.000130675	0.000477997	PCDHGB3
ENSG00000269973	-0.639694	6.85929e-09	3.56231e-08	RP11-95D17.1
ENSG00000262049	-0.697305	6.4065e-11	3.747e-10	RP13-1032I1.7
ENSG00000261889	1.20028	1.01624e-30	1.22505e-29	RP11-473M20.16
ENSG00000261685	1.35222	9.15222e-06	3.75108e-05	RP11-401P9.4
ENSG00000261678	-3.6613	1.47493e-65	3.59251e-64	SCRT1
ENSG00000261643	-1.02557	0.00010194	0.00037755	RP11-529E10.6
ENSG00000269891	-1.75222	1.29943e-05	5.25904e-05	ARHGAP19-SLIT1
ENSG00000261541	-0.977358	4.87544e-06	2.04998e-05	RP11-626K17.3
ENSG00000261439	-1.72593	9.67847e-06	3.95865e-05	DKFZP434H168
ENSG00000261409	-1.0832	8.89151e-07	3.98653e-06	RP6-24A23.7
ENSG00000261408	-0.917667	2.99228e-08	1.48851e-07	TEN1-CDK3
ENSG00000261385	1.45681	5.20911e-06	2.18434e-05	RP11-388M20.2
ENSG00000261379	-2.15391	5.41157e-08	2.65075e-07	RP11-395N3.1
ENSG00000261338	-0.845662	0.000104063	0.000385056	RP11-378A13.1
ENSG00000261335	-0.980928	4.24582e-14	2.89831e-13	RP11-318A15.2
ENSG00000261202	-0.924321	1.95648e-05	7.78816e-05	RP3-496C20.1
ENSG00000269113	-2.20774	4.30732e-08	2.1209e-07	TRABD2B
ENSG00000261115	5.80861	0	0	TMEM178B
ENSG00000261064	1.23075	0.000121248	0.00044545	RP11-1000B6.3
ENSG00000261052	0.851943	2.06014e-11	1.23474e-10	SULT1A3
ENSG00000261051	-1.98909	2.48639e-07	1.15982e-06	RP11-274H2.5
ENSG00000274214	1.7819	5.58986e-07	2.5444e-06	RP11-757O6.6
ENSG00000261026	-1.70689	1.66634e-05	6.66973e-05	CTD-3247F14.2
ENSG00000260903	-4.08975	5.05148e-192	4.50004e-190	XKR7
ENSG00000260788	1.52228	2.78473e-05	0.000109462	RP11-298D21.1
ENSG00000260686	-1.32419	3.65662e-15	2.6185e-14	CTB-36H16.2
ENSG00000267104	1.91607	2.16365e-06	9.39139e-06	TBC1D3P1-DHX40P1
ENSG00000279519	-0.707676	7.49991e-05	0.000281983	RP11-288C18.1
ENSG00000260469	-4.46388	8.48719e-52	1.63118e-50	C15orf59-AS1
ENSG00000260404	0.624594	7.93974e-05	0.000297855	RP11-384K6.6
ENSG00000260401	-1.10786	5.17981e-14	3.52084e-13	RP11-800A3.4
ENSG00000260400	-1.02204	8.04343e-06	3.31534e-05	RP11-119F7.5
ENSG00000260329	-0.708212	1.36619e-06	6.03151e-06	RP11-412D9.4
ENSG00000260296	-1.2424	5.02682e-09	2.63114e-08	RP11-395I6.3
ENSG00000260280	0.807926	1.34497e-07	6.40842e-07	SLX1B-SULT1A4
ENSG00000260274	-0.640788	0.000238971	0.000850114	RP11-817O13.8
ENSG00000260231	0.712122	1.02717e-10	5.93924e-10	JHDM1D-AS1
ENSG00000260228	0.80631	0.000101684	0.000376732	RP11-483P21.2
ENSG00000260081	-1.29123	1.76366e-07	8.31668e-07	RP11-66N11.8
ENSG00000260000	-1.03203	2.1487e-09	1.14817e-08	RP3-467N11.1
ENSG00000279561	-0.595385	1.41968e-10	8.13818e-10	RP11-4L24.4
ENSG00000259957	-1.81893	5.4242e-06	2.26997e-05	RP11-491F9.8
ENSG00000259867	1.25907	7.8478e-06	3.23888e-05	RP11-525K10.3
ENSG00000259725	0.665573	9.92288e-06	4.05292e-05	CTD-3032H12.1
ENSG00000259674	3.18415	2.91022e-30	3.47802e-29	RP11-356M20.1
ENSG00000259644	1.56089	8.63726e-05	0.000322734	RP11-680F8.4
ENSG00000259605	-1.40686	2.01499e-12	1.27304e-11	AC074212.5
ENSG00000260253	2.82723	2.00821e-25	2.08657e-24	RP4-676L2.1
ENSG00000259171	1.12999	2.28188e-27	2.51731e-26	RP11-903H12.5
ENSG00000267503	-1.63295	2.31068e-05	9.14237e-05	RP11-53B2.4
ENSG00000263843	-0.693517	1.67909e-06	7.35705e-06	RP11-649A18.12
ENSG00000259120	2.67133	4.87818e-28	5.47593e-27	SMIM6
ENSG00000259070	2.00951	1.30707e-18	1.07293e-17	LINC00639
ENSG00000259049	0.74629	7.89963e-05	0.000296524	RP11-589M4.1
ENSG00000258941	3.84981	3.00865e-36	4.16355e-35	RP11-407N17.3
ENSG00000268439	0.987829	8.15523e-13	5.24351e-12	RP3-461F17.3
ENSG00000272983	-1.00294	5.51002e-06	2.30438e-05	RP11-508N22.12
ENSG00000258818	1.09498	2.25951e-76	6.41183e-75	RNASE4
ENSG00000258659	1.35137	6.90323e-05	0.000260191	TRIM34
ENSG00000258656	-1.59602	1.11189e-05	4.52526e-05	RP11-193F5.4
ENSG00000258644	0.631453	5.31429e-06	2.22572e-05	SYNJ2BP-COX16
ENSG00000261371	0.730282	0.000180288	0.000651164	PECAM1
ENSG00000270276	-1.07938	2.92148e-14	2.01102e-13	HIST2H4B
ENSG00000258334	-0.908166	4.22388e-08	2.08077e-07	RP11-161H23.9
ENSG00000258301	0.697507	4.24145e-06	1.79189e-05	RP11-488C13.5
ENSG00000258297	-0.791596	3.219e-07	1.48724e-06	RP11-658F2.8
ENSG00000258279	-1.62617	5.45813e-05	0.000208277	LINC00592
ENSG00000258056	0.852312	1.29243e-18	1.06145e-17	RP11-644F5.11
ENSG00000257950	-0.867193	5.30109e-11	3.11587e-10	P2RX5-TAX1BP3
ENSG00000257891	1.16249	1.33487e-10	7.66026e-10	CTD-2311B13.1
ENSG00000257883	0.680064	1.74661e-07	8.24113e-07	RP11-497G19.1
ENSG00000257815	-0.612772	0.000227327	0.000811309	LINC01481
ENSG00000266176	-2.16257	1.51898e-09	8.18232e-09	RP11-855A2.5
ENSG00000257727	0.606843	1.24961e-52	2.44577e-51	CNPY2
ENSG00000257704	-1.00864	2.46815e-08	1.23469e-07	INAFM1
ENSG00000257654	1.30476	0.00019573	0.000703727	RP11-497G19.2
ENSG00000265787	2.57084	1.53466e-74	4.23469e-73	CYP4F35P
ENSG00000257503	-1.87618	3.30345e-06	1.40882e-05	CYB5AP5
ENSG00000257342	1.08106	5.73691e-08	2.80281e-07	RP11-571M6.7
ENSG00000257108	-0.990289	1.09049e-06	4.85386e-06	NHLRC4
ENSG00000279196	2.04751	4.30273e-28	4.83336e-27	RP11-1072A3.3
ENSG00000257093	0.998536	4.24353e-176	3.35093e-174	KIAA1147
ENSG00000256982	-1.2001	3.10049e-05	0.000121248	CTD-2555A7.2
ENSG00000256913	1.96899	7.56533e-07	3.41058e-06	RP1-102E24.6
ENSG00000256463	-2.75302	4.72076e-16	3.50941e-15	SALL3
ENSG00000273175	0.62661	0.000124108	0.000455067	RP11-11N7.4
ENSG00000256073	-0.698661	7.23666e-13	4.66792e-12	URB1-AS1
ENSG00000255874	1.20182	1.38803e-19	1.17966e-18	LINC00346
ENSG00000255864	-1.57514	9.09543e-05	0.000338903	RP11-444D3.1
ENSG00000268357	-0.656715	1.23247e-08	6.30147e-08	VN1R81P
ENSG00000270168	4.08765	1.68278e-121	8.3051e-120	LA16c-380H5.3
ENSG00000274349	0.872678	3.69404e-17	2.87513e-16	ZNF658
ENSG00000255571	-1.57322	2.98135e-51	5.67202e-50	MIR9-3HG
ENSG00000255408	-1.98132	2.39465e-14	1.65478e-13	PCDHA3
ENSG00000255240	1.63958	5.54763e-59	1.21437e-57	RP11-142C4.6
ENSG00000255129	-0.988868	2.62934e-06	1.13266e-05	RP11-839D17.3
ENSG00000254981	-1.02876	3.47611e-11	2.06366e-10	RP11-350N15.3
ENSG00000254864	-0.961538	4.5553e-10	2.53538e-09	CTD-2516F10.4
ENSG00000254786	1.17683	2.99036e-06	1.27991e-05	RP11-142C4.5
ENSG00000254717	0.674264	1.41338e-05	5.69931e-05	GLYATL1P2
ENSG00000254531	-0.877491	1.17529e-05	4.77475e-05	FLJ20021
ENSG00000274718	1.6198	3.40428e-06	1.4497e-05	RP11-346C4.3
ENSG00000254402	-0.858814	1.62069e-05	6.49514e-05	LRRC24
ENSG00000254343	1.61491	1.2635e-17	9.97972e-17	RP11-760H22.2
ENSG00000254057	1.48211	4.00813e-08	1.97815e-07	RP3-388N13.3
ENSG00000253972	2.6411	3.21079e-55	6.57812e-54	RP11-4K16.2
ENSG00000253844	1.6307	4.65303e-05	0.00017862	RP11-546K22.1
ENSG00000281991	1.56333	1.35888e-31	1.67084e-30	TMEM265
ENSG00000272638	-2.0263	4.31216e-07	1.9764e-06	GS1-114I9.1
ENSG00000253671	1.41535	8.84852e-05	0.000330204	RP11-806O11.1
ENSG00000253632	1.45778	0.000118829	0.000436965	RP11-486M23.1
ENSG00000253368	0.953879	1.3097e-15	9.55854e-15	TRNP1
ENSG00000272636	-0.722583	6.67572e-10	3.67717e-09	DOC2B
ENSG00000272904	2.53516	2.25083e-12	1.41812e-11	RP11-392E22.11
ENSG00000268204	-2.40256	2.44127e-20	2.13435e-19	CTD-3214H19.6
ENSG00000277268	-2.3233	1.59785e-23	1.55321e-22	RP11-445F12.1
ENSG00000269959	-0.866982	1.85617e-05	7.39993e-05	SPACA6P-AS
ENSG00000251664	-0.739889	3.18587e-10	1.78844e-09	PCDHA12
ENSG00000251661	-0.643672	1.1749e-06	5.2158e-06	RP11-326C3.11
ENSG00000251600	-1.35985	0.000105678	0.000390761	RP11-673E1.1
ENSG00000273413	1.76119	1.46074e-06	6.43382e-06	RP11-96C23.15
ENSG00000251201	1.39421	4.07687e-29	4.71887e-28	TMED7-TICAM2
ENSG00000251191	1.27508	0.000193759	0.000696954	LINC00589
ENSG00000250942	-1.25043	1.51995e-08	7.71947e-08	ENPP7P11
ENSG00000250722	0.894432	8.9748e-161	6.2806e-159	SEPP1
ENSG00000273749	1.52202	0	0	CYFIP1
ENSG00000250685	-1.00525	4.59517e-06	1.93646e-05	RP11-486L19.2
ENSG00000250588	0.948851	7.28043e-07	3.28492e-06	IQCJ-SCHIP1
ENSG00000250366	-1.13933	9.36247e-07	4.19064e-06	TUNAR
ENSG00000250303	-2.20764	2.99732e-16	2.24701e-15	RP11-356J5.12
ENSG00000272727	1.54431	8.4387e-05	0.00031561	RP11-142A22.4
ENSG00000269699	-0.951226	1.33474e-06	5.89751e-06	ZIM2
ENSG00000250230	0.947375	2.79829e-06	1.20124e-05	RP11-855O10.2
ENSG00000250221	1.45984	0.000226151	0.000807292	KRT8P32
ENSG00000279312	0.983645	1.0207e-05	4.16313e-05	RP3-331H24.7
ENSG00000250167	1.81085	1.52758e-11	9.2107e-11	CTC-321K16.1
ENSG00000250159	-2.23204	1.09601e-08	5.61903e-08	RP11-381K20.2
ENSG00000250120	-1.00738	2.96861e-75	8.28439e-74	PCDHA10
ENSG00000250067	0.620168	0.000128139	0.000469256	YJEFN3
ENSG00000250021	0.774427	2.11513e-15	1.53248e-14	C15orf38-AP3S2
ENSG00000268635	-0.762753	1.17426e-09	6.37373e-09	RP11-739B23.1
ENSG00000256940	1.23046	0.000172509	0.000624024	RP11-783K16.5
ENSG00000249464	3.37093	7.93612e-103	3.15678e-101	LINC01091
ENSG00000256683	-0.664896	5.56299e-25	5.69494e-24	ZNF350
ENSG00000249378	2.0669	1.5543e-07	7.36636e-07	LINC01060
ENSG00000249319	0.992662	5.18363e-05	0.000198109	AC068533.7
ENSG00000255545	4.55396	1.56224e-92	5.44247e-91	RP11-627G23.1
ENSG00000261488	-3.17977	1.28917e-18	1.05905e-17	RP11-757F18.5
ENSG00000267940	-0.793427	1.91852e-05	7.64276e-05	RP11-290F24.6
ENSG00000249014	-0.950675	7.04231e-05	0.000265308	HMGN2P4
ENSG00000270562	-1.07463	2.15045e-08	1.07965e-07	RP11-154H23.3
ENSG00000250413	2.05932	3.63476e-10	2.03365e-09	RP11-448G15.1
ENSG00000248527	1.25985	2.677e-11	1.59666e-10	MTATP6P1
ENSG00000248485	4.87445	2.83901e-51	5.40766e-50	PCP4L1
ENSG00000248383	-0.89185	1.51118e-20	1.32918e-19	PCDHAC1
ENSG00000248211	1.65697	4.12714e-05	0.000159293	TRPC7-AS1
ENSG00000279773	2.26007	1.03679e-23	1.014e-22	AL050303.10
ENSG00000247982	1.19219	3.81939e-09	2.01232e-08	LINC00926
ENSG00000247317	1.04526	2.62694e-13	1.72865e-12	RP11-273G15.2
ENSG00000247077	0.819525	3.57643e-100	1.38137e-98	PGAM5
ENSG00000246350	1.62222	8.16632e-07	3.67375e-06	RP5-1186N24.3
ENSG00000246223	-1.72997	1.28926e-20	1.13618e-19	LINC01550
ENSG00000261594	-1.85215	2.6071e-06	1.12354e-05	TPBGL
ENSG00000244757	-1.67434	5.65139e-06	2.36196e-05	RP11-45A16.4
ENSG00000273062	0.657737	0.000274846	0.000971148	RP11-428K3.1
ENSG00000244588	6.32845	5.06385e-124	2.57877e-122	RAD21L1
ENSG00000244457	-2.01824	5.35251e-07	2.44053e-06	ENO1P1
ENSG00000244405	5.6425	5.81766e-211	5.90649e-209	ETV5
ENSG00000244402	-1.15955	3.44465e-14	2.36301e-13	RN7SL314P
ENSG00000244270	-1.2033	8.42227e-11	4.89465e-10	RPL32P29
ENSG00000244219	1.35884	5.99213e-14	4.05919e-13	GS1-259H13.2
ENSG00000248008	0.623925	3.97017e-14	2.71652e-13	NRAV
ENSG00000244198	0.955455	1.71753e-05	6.86775e-05	RP4-545C24.1
ENSG00000243989	0.833754	2.03188e-36	2.82775e-35	ACY1
ENSG00000243742	0.805569	2.24057e-13	1.48049e-12	RPLP0P2
ENSG00000243627	-2.05022	6.24623e-17	4.81235e-16	AP000322.53
ENSG00000262768	-1.46016	2.37809e-05	9.40442e-05	RP11-353N14.1
ENSG00000243554	1.03694	9.40427e-07	4.20817e-06	AC004967.7
ENSG00000243479	0.679313	1.1203e-06	4.98031e-06	MNX1-AS1
ENSG00000260257	-0.76049	2.9053e-14	2.00031e-13	RP5-1085F17.3
ENSG00000243199	0.808428	7.83131e-09	4.05526e-08	RP11-408P14.1
ENSG00000242612	0.621329	1.58757e-24	1.60063e-23	DECR2
ENSG00000242539	-0.954632	2.52287e-05	9.95727e-05	AC007620.3
ENSG00000278709	-0.86321	5.05169e-08	2.47827e-07	NKILA
ENSG00000242267	-0.981764	3.71153e-05	0.000143981	SKINTL
ENSG00000242265	1.71245	0	0	PEG10
ENSG00000272841	0.860817	1.39239e-08	7.09078e-08	RP3-428L16.2
ENSG00000260693	1.44539	0.000160507	0.000582652	AC026150.8
ENSG00000241889	1.66301	3.63918e-05	0.000141312	RP11-435F17.3
ENSG00000241878	0.632989	1.26345e-28	1.44567e-27	PISD
ENSG00000241839	-1.18953	1.47821e-09	7.97345e-09	PLEKHO2
ENSG00000253741	0.862855	3.90353e-10	2.17907e-09	CTD-2292P10.4
ENSG00000241679	1.93747	1.15542e-06	5.13431e-06	RP11-80H8.4
ENSG00000241484	-1.02362	1.6272e-82	5.0231e-81	ARHGAP8
ENSG00000241468	0.840344	1.6364e-66	4.03498e-65	ATP5J2
ENSG00000272323	-1.85116	3.17226e-21	2.85941e-20	CTD-2517O10.6
ENSG00000245888	1.00214	1.30189e-09	7.0414e-09	FLJ21408
ENSG00000255650	1.13351	4.63279e-08	2.2759e-07	FAM222A-AS1
ENSG00000272622	-2.86637	3.35675e-14	2.30469e-13	RP11-395N3.2
ENSG00000244968	-2.43223	4.1558e-33	5.31627e-32	LIFR-AS1
ENSG00000240875	1.45323	1.57507e-06	6.92213e-06	LINC00886
ENSG00000240859	0.629367	1.66538e-05	6.66671e-05	AC093627.10
ENSG00000240499	1.6934	1.66451e-06	7.29817e-06	RP5-1101C3.1
ENSG00000240280	-1.01482	7.51726e-08	3.64202e-07	TCAM1P
ENSG00000240065	0.976355	0.000136901	0.000499571	PSMB9
ENSG00000240005	-1.24892	2.71059e-09	1.43927e-08	RP11-293A21.1
ENSG00000275183	0.988451	3.25686e-16	2.43872e-15	LENG9
ENSG00000271367	-2.18377	9.88578e-10	5.39057e-09	RP3-483K16.4
ENSG00000239677	-1.57309	1.65836e-05	6.63945e-05	PDZRN3-AS1
ENSG00000239672	0.621062	5.58213e-50	1.03311e-48	NME1
ENSG00000276570	-0.877457	2.51845e-05	9.94231e-05	CTD-2587H24.14
ENSG00000239508	1.63508	3.76683e-05	0.000146021	PLCH1-AS1
ENSG00000239264	0.854228	1.39156e-162	9.93383e-161	TXNDC5
ENSG00000264112	-0.769043	4.85081e-17	3.75536e-16	RP11-159D12.2
ENSG00000258203	-1.24692	6.30825e-10	3.48015e-09	RP1-228P16.3
ENSG00000244642	0.672268	3.90894e-07	1.79641e-06	RN7SL396P
ENSG00000238832	1.46315	9.37586e-05	0.000348865	snoU109
ENSG00000238622	-0.705943	0.00014821	0.000539546	SNORD97
ENSG00000279013	1.25542	4.94108e-06	2.07651e-05	RP11-254A24.2
ENSG00000259780	3.27749	8.61238e-25	8.76058e-24	RP11-304L19.12
ENSG00000238283	3.12174	4.41695e-15	3.14958e-14	TBC1D3P1
ENSG00000238197	-1.22013	9.98506e-28	1.10995e-26	PAXBP1-AS1
ENSG00000261587	-2.33023	1.65574e-11	9.96652e-11	TMEM249
ENSG00000238145	2.74708	1.74273e-19	1.47601e-18	RP11-346M5.1
ENSG00000238117	2.01955	5.27508e-09	2.75883e-08	AP004372.1
ENSG00000238083	-0.648385	2.01664e-18	1.64316e-17	LRRC37A2
ENSG00000238078	1.01435	5.7423e-05	0.000218561	LINC01352
ENSG00000237970	-0.855374	1.29565e-10	7.44449e-10	TMEM161BP1
ENSG00000237943	2.27126	7.31509e-15	5.16889e-14	PRKCQ-AS1
ENSG00000237863	-1.41194	1.01267e-05	4.13196e-05	RP6-24A23.3
ENSG00000237807	1.06892	3.00057e-05	0.000117513	RP11-400K9.4
ENSG00000237765	-0.674409	1.41692e-24	1.43129e-23	FAM200B
ENSG00000237750	-1.39594	0.000215283	0.000770647	AC007740.1
ENSG00000279406	-0.648837	8.93694e-05	0.000333309	RP11-327E2.5
ENSG00000237742	-1.32257	2.57989e-10	1.45567e-09	RP11-624M8.1
ENSG00000237541	2.68342	8.15055e-194	7.36335e-192	HLA-DQA2
ENSG00000237517	-1.13196	9.9378e-25	1.00863e-23	DGCR5
ENSG00000249252	-1.17445	0.000121851	0.000447458	RP11-665G4.1
ENSG00000242173	-2.01662	1.28711e-13	8.59536e-13	ARHGDIG
ENSG00000237379	2.36285	9.80257e-11	5.67722e-10	CBX1P3
ENSG00000271727	-1.46551	2.07248e-12	1.30859e-11	RP11-532F6.4
ENSG00000237172	-2.5876	3.28668e-37	4.67994e-36	B3GNT9
ENSG00000272106	-0.741806	4.23932e-16	3.16253e-15	RP11-345P4.9
ENSG00000267395	-1.08216	1.21746e-05	4.93857e-05	AC074212.6
ENSG00000236901	-1.10379	5.58626e-44	9.14768e-43	MIR600HG
ENSG00000236794	-1.51181	0.000131863	0.000482011	BCRP8
ENSG00000236753	0.754932	7.92872e-06	3.2689e-05	MKLN1-AS
ENSG00000236714	1.03956	1.41656e-08	7.20812e-08	AC005592.1
ENSG00000236699	3.61077	4.67632e-115	2.1426e-113	ARHGEF38
ENSG00000236698	0.916558	5.08551e-09	2.66142e-08	EIF1AXP1
ENSG00000236581	-1.33565	0.000102799	0.0003806	STARD13-AS
ENSG00000236516	-1.22456	0.000156661	0.000569079	KLF2P4
ENSG00000236514	-0.764875	7.9277e-05	0.000297446	RP11-162G10.5
ENSG00000236431	-1.74671	1.69782e-06	7.43603e-06	AC009237.11
ENSG00000236313	-0.705591	6.46407e-13	4.17884e-12	VN1R53P
ENSG00000236296	-1.19689	9.96538e-09	5.12466e-08	GUSBP5
ENSG00000236289	3.59115	2.01361e-33	2.59352e-32	GACAT3
ENSG00000235961	2.15738	8.24565e-09	4.26361e-08	PNMA6A
ENSG00000278831	-1.3687	5.01731e-05	0.000191982	RP11-12J10.4
ENSG00000235713	1.8558	2.34147e-06	1.01296e-05	RP4-604G5.3
ENSG00000235631	1.97676	1.36377e-07	6.49514e-07	RNF148
ENSG00000235584	-1.1909	3.05376e-78	8.94343e-77	AC008268.1
ENSG00000235568	1.26654	8.82813e-20	7.59163e-19	NFAM1
ENSG00000235478	-1.3075	0.000204766	0.000734481	AC006946.15
ENSG00000235501	1.36258	7.14271e-21	6.37008e-20	RP4-639F20.1
ENSG00000235343	2.02335	2.39702e-10	1.3556e-09	AC005301.8
ENSG00000235280	-3.11242	9.40547e-20	8.07941e-19	MCF2L-AS1
ENSG00000274370	-1.59801	3.83797e-06	1.62702e-05	AC144831.3
ENSG00000235209	-0.982203	1.37821e-05	5.56382e-05	CTA-150C2.13
ENSG00000253882	-0.802988	2.59994e-15	1.8744e-14	RP11-61L23.2
ENSG00000235123	1.50447	3.56293e-12	2.21944e-11	DSCAM-AS1
ENSG00000235091	-2.29769	1.63068e-67	4.07745e-66	WI2-85898F10.1
ENSG00000235027	1.1771	2.64071e-12	1.65626e-11	AC068580.6
ENSG00000272031	-0.661793	1.37401e-05	5.54896e-05	ANKRD34A
ENSG00000282416	0.933836	9.61853e-05	0.000357437	LLNLF-173C4.2
ENSG00000234869	0.60573	0.000134418	0.000490844	RP3-439F8.1
ENSG00000234814	0.978347	6.73012e-05	0.000253996	SVILP1
ENSG00000244306	1.34299	4.91044e-15	3.49601e-14	LINC01296
ENSG00000234752	-1.15989	1.44168e-05	5.80613e-05	RP11-428L9.1
ENSG00000265962	-1.65462	3.64744e-05	0.000141598	GACAT2
ENSG00000253106	-0.694005	6.3284e-08	3.0819e-07	RP11-158K1.3
ENSG00000241388	2.56623	1.42623e-70	3.72346e-69	HNF1A-AS1
ENSG00000234409	1.95515	2.07005e-20	1.81178e-19	CCDC188
ENSG00000243709	2.13938	2.49266e-27	2.74605e-26	LEFTY1
ENSG00000240541	-2.6082	1.00261e-13	6.73342e-13	TM4SF1-AS1
ENSG00000250644	1.70301	2.36213e-14	1.63337e-13	RP11-295K3.1
ENSG00000234129	-0.894786	0.000241494	0.000858613	RP11-120D5.1
ENSG00000278627	-1.07668	8.14491e-05	0.000305193	RP11-506H21.5
ENSG00000234062	-0.646169	0.000108269	0.000399833	RP11-308D16.2
ENSG00000233834	2.6306	1.41512e-48	2.54395e-47	AC005083.1
ENSG00000233728	-1.32954	0.000176516	0.000638014	RP11-109P14.9
ENSG00000250522	1.50467	0.000140601	0.000512485	AC004066.3
ENSG00000233718	1.05812	2.23723e-13	1.47859e-12	MYCNOS
ENSG00000261716	-0.633376	1.59859e-12	1.01458e-11	RP11-196G18.22
ENSG00000233461	0.641438	1.76455e-05	7.04433e-05	RP11-295G20.2
ENSG00000233421	1.01751	1.32495e-17	1.04548e-16	RP5-875O13.1
ENSG00000233396	0.723038	3.35835e-07	1.55005e-06	RP11-458D21.1
ENSG00000233255	4.16591	9.63298e-42	1.5072e-40	AC019181.2
ENSG00000233237	1.39706	3.31421e-30	3.95197e-29	LINC00472
ENSG00000233078	1.87163	1.75359e-07	8.27164e-07	RP11-5P18.5
ENSG00000233028	-3.03684	9.05303e-15	6.37159e-14	RP4-725G10.4
ENSG00000233009	1.96419	7.50119e-08	3.63478e-07	NALCN-AS1
ENSG00000280587	1.70452	4.19813e-15	2.99621e-14	LINC01348
ENSG00000232956	1.10989	3.21324e-93	1.1305e-91	SNHG15
ENSG00000232843	1.70921	1.97523e-05	7.86086e-05	SNX18P2
ENSG00000249917	1.05126	0.000277427	0.000979725	LINC00536
ENSG00000232682	1.25916	0.00011108	0.000409786	RP11-388P9.2
ENSG00000232653	1.89034	2.03544e-34	2.67333e-33	GOLGA8N
ENSG00000232300	-1.19919	1.12622e-18	9.27094e-18	FAM215B
ENSG00000232224	1.58713	2.70158e-07	1.25672e-06	LINC00202-1
ENSG00000256139	0.92168	0.000100568	0.000372816	RP11-968O1.5
ENSG00000232124	0.682197	8.88367e-17	6.79523e-16	AP001057.1
ENSG00000232073	2.14298	2.07535e-08	1.04342e-07	RP1-302D9.3
ENSG00000244187	0.795726	1.43302e-36	2.00918e-35	TMEM141
ENSG00000265148	-1.05554	6.2772e-08	3.05743e-07	BZRAP1-AS1
ENSG00000231856	-0.706566	5.51367e-05	0.00021022	RP11-327P2.5
ENSG00000231789	-0.927548	9.69542e-05	0.000360001	PIK3CD-AS2
ENSG00000231764	-1.81622	2.43643e-19	2.05268e-18	DLX6-AS1
ENSG00000231651	1.14801	0.00028135	0.000993251	DLG3-AS1
ENSG00000233723	-1.66779	2.58792e-16	1.94648e-15	LINC01122
ENSG00000231483	2.36591	1.93498e-13	1.28334e-12	RP11-336A10.5
ENSG00000271966	-0.914994	0.000269994	0.000954741	RP11-7F18.2
ENSG00000272894	0.769361	7.30937e-05	0.00027511	RP5-1159O4.1
ENSG00000235026	-0.970233	5.99688e-10	3.3118e-09	DPP10-AS1
ENSG00000231312	0.860269	1.907e-17	1.49774e-16	AC007246.3
ENSG00000238249	-0.998444	2.48335e-07	1.15857e-06	HMGN2P17
ENSG00000273654	1.32077	0.000130436	0.000477284	CTB-52I2.4
ENSG00000254793	1.54602	3.77301e-06	1.60075e-05	FDPSP4
ENSG00000231156	-1.76892	1.02661e-05	4.18614e-05	AC093702.1
ENSG00000126803	0.722397	4.99065e-22	4.62358e-21	HSPA2
ENSG00000223764	-3.21611	5.69391e-110	2.44098e-108	RP11-54O7.3
ENSG00000150637	0.775074	3.58418e-05	0.000139244	CD226
ENSG00000181104	1.03418	1.0762e-117	5.03921e-116	F2R
ENSG00000230563	-2.1514	5.19785e-08	2.54801e-07	RP5-828H9.1
ENSG00000180964	1.36888	5.53683e-122	2.74959e-120	TCEAL8
ENSG00000180879	1.05118	1.90058e-186	1.62087e-184	SSR4
ENSG00000138642	-0.800125	4.59688e-05	0.000176528	HERC6
ENSG00000169047	-2.12281	4.59359e-285	7.38229e-283	IRS1
ENSG00000145103	1.64943	1.09773e-10	6.33693e-10	ILDR1
ENSG00000148935	0.794623	6.47695e-06	2.69257e-05	GAS2
ENSG00000108852	-0.78897	1.77749e-42	2.83521e-41	MPP2
ENSG00000186094	-1.28014	1.52214e-16	1.15491e-15	AGBL4
ENSG00000223802	-1.4073	1.69158e-43	2.74612e-42	CERS1
ENSG00000230873	0.656001	2.73874e-16	2.05798e-15	STMND1
ENSG00000180178	-2.07319	3.27219e-30	3.90477e-29	FAR2P1
ENSG00000180155	0.625893	8.27358e-26	8.68957e-25	LYNX1
ENSG00000112245	0.669358	4.41294e-12	2.73032e-11	PTP4A1
ENSG00000169180	0.966515	1.85375e-159	1.27769e-157	XPO6
ENSG00000184897	-0.614814	3.26565e-29	3.7895e-28	H1FX
ENSG00000180044	1.58352	6.55466e-09	3.40742e-08	C3orf80
ENSG00000114315	2.39724	0	0	HES1
ENSG00000103942	-1.20881	5.02417e-200	4.71197e-198	HOMER2
ENSG00000255189	1.37317	1.24434e-06	5.51485e-06	GLYATL1P1
ENSG00000173621	-1.60996	3.22599e-80	9.6421e-79	LRFN4
ENSG00000231240	-2.94575	2.19524e-15	1.58873e-14	KLF2P1
ENSG00000179841	-0.862788	6.51754e-09	3.38868e-08	AKAP5
ENSG00000233184	1.10976	2.2264e-14	1.54151e-13	RP11-421L21.3
ENSG00000179456	3.1104	5.51555e-182	4.56976e-180	ZBTB18
ENSG00000278897	-0.756262	8.85016e-07	3.96911e-06	AC020951.1
ENSG00000179403	1.70305	4.97579e-132	2.76269e-130	VWA1
ENSG00000179240	-0.75734	1.36031e-94	4.91571e-93	RP11-111M22.2
ENSG00000179222	1.40967	1.57009e-162	1.11833e-160	MAGED1
ENSG00000164985	-1.00919	4.5701e-210	4.6252e-208	PSIP1
ENSG00000196748	-1.44233	0.000159932	0.000580631	CLPSL2
ENSG00000178977	0.633681	5.03852e-10	2.79703e-09	LINC00324
ENSG00000179023	-1.82766	1.65176e-14	1.14962e-13	KLHDC7A
ENSG00000167711	2.22673	7.58341e-13	4.88469e-12	SERPINF2
ENSG00000170965	-1.09133	5.80144e-12	3.56937e-11	PLAC1
ENSG00000178607	0.892222	3.69997e-37	5.2614e-36	ERN1
ENSG00000136111	0.719101	3.0389e-47	5.30498e-46	TBC1D4
ENSG00000178538	5.60358	1.46403e-106	6.03365e-105	CA8
ENSG00000110104	0.770561	2.06527e-20	1.80809e-19	CCDC86
ENSG00000226777	-2.66204	1.32981e-22	1.2575e-21	KIAA0125
ENSG00000096060	2.00487	1.28861e-196	1.18422e-194	FKBP5
ENSG00000178162	-0.700571	3.275e-05	0.00012776	FAR2P2
ENSG00000178149	0.648514	2.70532e-52	5.24274e-51	DALRD3
ENSG00000276203	0.611517	2.09966e-05	8.33427e-05	ANKRD20A3
ENSG00000178075	1.36316	2.66756e-52	5.17351e-51	GRAMD1C
ENSG00000077157	-0.62388	3.27423e-18	2.64494e-17	PPP1R12B
ENSG00000177981	0.693691	4.13948e-49	7.5347e-48	ASB8
ENSG00000214128	2.06738	9.41497e-44	1.53466e-42	TMEM213
ENSG00000177707	3.25817	1.69988e-16	1.28702e-15	PVRL3
ENSG00000177700	0.75964	1.7776e-46	3.05972e-45	POLR2L
ENSG00000143079	-1.06689	1.63862e-36	2.29443e-35	CTTNBP2NL
ENSG00000171631	-1.40194	7.10133e-18	5.66919e-17	P2RY6
ENSG00000177483	-0.842956	8.01787e-05	0.000300644	RBM44
ENSG00000226124	1.5956	2.61317e-19	2.19868e-18	FTCDNL1
ENSG00000109466	2.89342	6.81873e-87	2.23203e-85	KLHL2
ENSG00000273148	-1.2344	1.04556e-07	5.02677e-07	RP5-1068E13.7
ENSG00000108861	0.632892	8.4812e-55	1.72653e-53	DUSP3
ENSG00000205002	-2.45151	3.69792e-33	4.74001e-32	AARD
ENSG00000205426	1.12347	1.81858e-07	8.56681e-07	KRT81
ENSG00000164050	-0.595646	9.03274e-80	2.67974e-78	PLXNB1
ENSG00000272686	0.847325	7.21557e-34	9.37291e-33	RP11-390E23.6
ENSG00000049860	1.34302	1.63204e-284	2.60971e-282	HEXB
ENSG00000140545	-0.922172	6.62076e-16	4.89796e-15	MFGE8
ENSG00000176749	-1.76736	4.48092e-58	9.69582e-57	CDK5R1
ENSG00000033327	-0.631138	6.91517e-39	1.01867e-37	GAB2
ENSG00000176595	0.964653	4.48048e-27	4.89547e-26	KBTBD11
ENSG00000182718	-4.49475	0	0	ANXA2
ENSG00000176531	-0.857083	3.50684e-41	5.41275e-40	PHLDB3
ENSG00000157600	-1.00055	4.79272e-115	2.19279e-113	TMEM164
ENSG00000176490	-2.46726	8.44493e-128	4.44206e-126	DIRAS1
ENSG00000176125	0.654532	0.000239206	0.000850855	UFSP1
ENSG00000176046	2.14159	5.5043e-100	2.12088e-98	NUPR1
ENSG00000176024	-0.722896	2.61087e-32	3.27958e-31	ZNF613
ENSG00000167085	0.804801	7.14002e-99	2.71193e-97	PHB
ENSG00000204140	-1.86204	9.54011e-07	4.26418e-06	CLPSL1
ENSG00000133424	-0.823232	3.91425e-90	1.32188e-88	LARGE
ENSG00000136436	1.71043	0	0	CALCOCO2
ENSG00000175591	-1.15749	1.93326e-17	1.51762e-16	P2RY2
ENSG00000175556	-1.53675	2.52676e-05	9.97139e-05	LONRF3
ENSG00000175471	1.61955	7.17711e-36	9.82162e-35	MCTP1
ENSG00000176406	-0.731137	4.24953e-44	6.98377e-43	RIMS2
ENSG00000188993	-1.43649	0.000163968	0.000594544	LRRC66
ENSG00000175215	0.650659	3.86176e-49	7.0332e-48	CTDSP2
ENSG00000175198	0.684629	1.48379e-26	1.5999e-25	PCCA
ENSG00000175175	-1.52676	1.3547e-21	1.23749e-20	PPM1E
ENSG00000203805	-1.8375	2.64564e-06	1.13892e-05	PLPP4
ENSG00000175161	1.88475	2.06867e-192	1.85317e-190	CADM2
ENSG00000196421	-0.793596	4.56003e-10	2.53757e-09	LINC00176
ENSG00000175040	1.66643	3.3571e-05	0.000130851	CHST2
ENSG00000264696	1.6392	4.16771e-05	0.000160762	AC108078.1
ENSG00000273419	0.975206	6.92776e-09	3.59728e-08	RP4-751H13.7
ENSG00000174951	-0.587798	2.11973e-21	1.92043e-20	FUT1
ENSG00000160188	0.636666	1.74572e-08	8.82128e-08	RSPH1
ENSG00000240038	-0.780722	1.19457e-07	5.7131e-07	AMY2B
ENSG00000174500	-3.46767	1.85176e-24	1.86055e-23	GCSAM
ENSG00000174384	0.854716	9.06839e-09	4.67844e-08	RP11-313P13.4
ENSG00000132356	-0.710698	1.28854e-60	2.89999e-59	PRKAA1
ENSG00000174255	2.05604	3.82345e-08	1.88992e-07	ZNF80
ENSG00000101695	0.64253	1.75836e-10	1.00203e-09	RNF125
ENSG00000174099	1.60596	1.64039e-08	8.30875e-08	MSRB3
ENSG00000063015	-3.40237	1.98668e-47	3.48334e-46	SEZ6
ENSG00000112306	0.894188	7.01794e-135	4.00787e-133	RPS12
ENSG00000169599	1.47871	2.4224e-137	1.4137e-135	NFU1
ENSG00000108639	1.04335	7.76395e-150	4.99596e-148	SYNGR2
ENSG00000173905	1.07356	1.36743e-160	9.54843e-159	GOLIM4
ENSG00000171489	1.60056	6.30992e-05	0.000238983	SPACA5
ENSG00000173868	2.11683	1.39167e-15	1.01498e-14	PHOSPHO1
ENSG00000132692	-1.78239	1.00376e-05	4.09767e-05	BCAN
ENSG00000259611	2.57646	6.31866e-11	3.69834e-10	LINC01582
ENSG00000173714	1.73494	1.01091e-05	4.12531e-05	WFIKKN2
ENSG00000002933	-2.55297	1.14315e-144	7.11266e-143	TMEM176A
ENSG00000173641	1.64984	1.80196e-09	9.67571e-09	HSPB7
ENSG00000173511	-1.02779	2.33526e-13	1.54147e-12	VEGFB
ENSG00000243350	-0.68341	3.83588e-06	1.62645e-05	RP11-379F12.3
ENSG00000173267	1.5456	1.23675e-10	7.11378e-10	SNCG
ENSG00000173175	1.33403	2.24966e-07	1.05308e-06	ADCY5
ENSG00000173088	1.59041	2.5541e-13	1.68244e-12	C10orf131
ENSG00000170819	-1.97225	4.76921e-07	2.1811e-06	BFSP2
ENSG00000172986	1.1941	2.50902e-13	1.65377e-12	GXYLT2
ENSG00000225953	-3.08834	3.08876e-18	2.49701e-17	SATB2-AS1
ENSG00000172935	-1.15431	9.22629e-17	7.04888e-16	MRGPRF
ENSG00000172927	1.55699	1.68876e-11	1.01614e-10	MYEOV
ENSG00000180878	-0.944669	3.96476e-05	0.000153266	C11orf42
ENSG00000103363	0.891493	1.78786e-82	5.51375e-81	TCEB2
ENSG00000172731	-0.744676	4.54224e-13	2.96097e-12	LRRC20
ENSG00000152217	-0.634868	1.20453e-19	1.02725e-18	SETBP1
ENSG00000172551	1.46981	3.99302e-26	4.23973e-25	MUCL1
ENSG00000104419	-2.36338	4.48714e-36	6.17218e-35	NDRG1
ENSG00000064300	3.76303	2.71155e-66	6.67062e-65	NGFR
ENSG00000163281	1.67099	4.98353e-73	1.34383e-71	GNPDA2
ENSG00000177868	-1.30049	3.32426e-49	6.05774e-48	SVBP
ENSG00000165644	1.26504	1.30137e-52	2.54395e-51	COMTD1
ENSG00000172269	0.660114	8.9077e-17	6.81198e-16	DPAGT1
ENSG00000172250	0.611962	9.52495e-07	4.258e-06	SERHL
ENSG00000172232	-1.98794	1.64676e-11	9.91437e-11	AZU1
ENSG00000176884	-1.36937	3.31352e-24	3.29405e-23	GRIN1
ENSG00000172197	-0.76012	2.3184e-26	2.48391e-25	MBOAT1
ENSG00000143409	-0.771738	5.20019e-46	8.87446e-45	FAM63A
ENSG00000274817	1.48796	4.75446e-05	0.000182317	HOTAIR_4
ENSG00000137547	0.72966	1.0172e-35	1.38666e-34	MRPL15
ENSG00000171877	-0.644195	2.74697e-05	0.000108057	FRMD5
ENSG00000139438	1.38846	6.99747e-98	2.62352e-96	FAM222A
ENSG00000163939	-0.590894	5.64738e-40	8.50725e-39	PBRM1
ENSG00000271911	-1.54849	1.12142e-08	5.7447e-08	RP11-532F6.5
ENSG00000140450	0.951856	1.04826e-25	1.09916e-24	ARRDC4
ENSG00000171503	1.32255	1.10417e-84	3.50671e-83	ETFDH
ENSG00000171490	1.04573	8.0123e-274	1.20869e-271	RSL1D1
ENSG00000171488	-1.58004	1.34376e-25	1.40394e-24	LRRC8C
ENSG00000171448	-1.10493	8.28578e-40	1.24232e-38	ZBTB26
ENSG00000140396	0.893563	6.3431e-219	6.71718e-217	NCOA2
ENSG00000205542	-1.73806	0	0	TMSB4X
ENSG00000139144	-0.870364	1.3551e-06	5.98335e-06	PIK3C2G
ENSG00000171243	3.31839	7.83497e-25	7.99012e-24	SOSTDC1
ENSG00000261359	2.02037	3.64724e-20	3.17394e-19	PYCARD-AS1
ENSG00000168539	3.77707	1.90333e-105	7.76409e-104	CHRM1
ENSG00000171119	-0.971748	1.81332e-06	7.91695e-06	NRTN
ENSG00000170893	2.35922	9.51457e-11	5.51541e-10	TRH
ENSG00000203804	-0.65235	0.000103333	0.000382487	ADAMTSL4-AS1
ENSG00000170791	2.53914	2.25371e-171	1.73259e-169	CHCHD7
ENSG00000176225	0.887228	7.94728e-94	2.82716e-92	RTTN
ENSG00000011258	-0.64217	1.10707e-25	1.16006e-24	MBTD1
ENSG00000182600	-1.54007	9.57094e-14	6.43854e-13	C2orf82
ENSG00000170745	0.652526	1.35953e-28	1.55282e-27	KCNS3
ENSG00000170629	-1.06449	4.35932e-36	5.99895e-35	DPY19L2P2
ENSG00000170624	-2.10592	1.55808e-07	7.38314e-07	SGCD
ENSG00000250305	1.00217	4.15161e-53	8.20596e-52	KIAA1456
ENSG00000271880	1.432	5.62593e-22	5.20309e-21	AGAP11
ENSG00000170577	1.77645	5.9417e-83	1.85206e-81	SIX2
ENSG00000169093	0.686625	7.0733e-37	1.00094e-35	ASMTL
ENSG00000170473	0.599602	8.66295e-25	8.80641e-24	PYM1
ENSG00000179528	1.22985	4.47825e-14	3.05371e-13	LBX2
ENSG00000170421	1.11649	2.61887e-216	2.74604e-214	KRT8
ENSG00000170390	-1.63416	2.06212e-06	8.96529e-06	DCLK2
ENSG00000170293	-0.661395	2.96112e-06	1.26756e-05	CMTM8
ENSG00000004777	-0.843645	1.09889e-21	1.0064e-20	ARHGAP33
ENSG00000170271	-1.7578	7.40369e-16	5.46704e-15	FAXDC2
ENSG00000048471	1.45004	1.10195e-115	5.09269e-114	SNX29
ENSG00000177679	-4.93443	3.31263e-70	8.57129e-69	SRRM3
ENSG00000178796	-1.55834	7.02919e-06	2.91117e-05	RIIAD1
ENSG00000171714	1.16017	4.67823e-148	2.98632e-146	ANO5
ENSG00000170099	4.14072	5.99505e-46	1.022e-44	SERPINA6
ENSG00000170011	-1.19485	8.50111e-42	1.33272e-40	MYRIP
ENSG00000169918	-1.49696	3.08572e-18	2.49518e-17	OTUD7A
ENSG00000086598	0.645071	1.61674e-118	7.60366e-117	TMED2
ENSG00000162591	-0.621378	7.62133e-25	7.77473e-24	MEGF6
ENSG00000179598	-0.588163	5.27708e-08	2.58606e-07	PLD6
ENSG00000169783	-0.829832	2.92466e-18	2.36614e-17	LINGO1
ENSG00000160460	-2.46814	1.16323e-92	4.05685e-91	SPTBN4
ENSG00000169738	0.859406	1.58282e-48	2.84384e-47	DCXR
ENSG00000169682	1.03307	4.4502e-84	1.40773e-82	SPNS1
ENSG00000169627	0.985724	1.40621e-45	2.382e-44	BOLA2B
ENSG00000010404	-0.695236	5.0612e-30	6.00379e-29	IDS
ENSG00000169507	2.79051	7.43364e-16	5.48788e-15	SLC38A11
ENSG00000260804	-1.22132	1.88356e-57	4.01321e-56	PKI55
ENSG00000170873	3.04391	0	0	MTSS1
ENSG00000169436	6.86547	1.90975e-83	5.98197e-82	COL22A1
ENSG00000169418	2.62826	4.47554e-16	3.33253e-15	NPR1
ENSG00000169403	2.24251	7.54684e-50	1.39351e-48	PTAFR
ENSG00000182489	1.01423	2.71381e-08	1.35441e-07	XKRX
ENSG00000111252	-0.729196	3.73049e-13	2.43977e-12	SH2B3
ENSG00000169230	0.614367	1.61833e-45	2.73695e-44	PRELID1
ENSG00000169193	1.23448	1.34231e-21	1.22653e-20	CCDC126
ENSG00000169071	2.31953	6.94725e-19	5.76044e-18	ROR2
ENSG00000169026	0.770566	7.89082e-06	3.25495e-05	MFSD7
ENSG00000168913	-1.44208	1.6259e-64	3.90374e-63	ENHO
ENSG00000168781	-0.664916	3.24492e-45	5.44468e-44	PPIP5K1
ENSG00000006016	1.03917	1.63956e-08	8.30583e-08	CRLF1
ENSG00000237310	0.753734	2.66302e-07	1.23896e-06	GS1-124K5.4
ENSG00000106299	1.45761	1.52856e-252	2.0891e-250	WASL
ENSG00000250470	-1.27524	0.000135444	0.000494424	AP000351.3
ENSG00000196562	-0.921254	1.22803e-53	2.43785e-52	SULF2
ENSG00000240891	2.26207	1.74973e-09	9.40312e-09	PLCXD2
ENSG00000159640	2.99066	2.9634e-54	5.94558e-53	ACE
ENSG00000168487	-1.61838	3.20961e-22	2.99523e-21	BMP1
ENSG00000168461	1.40722	1.0183e-07	4.8994e-07	RAB31
ENSG00000168447	-1.29059	8.82482e-07	3.95885e-06	SCNN1B
ENSG00000168434	0.835779	3.29714e-56	6.86496e-55	COG7
ENSG00000251322	-0.771924	1.68405e-08	8.52313e-08	SHANK3
ENSG00000168421	-1.02008	1.33526e-19	1.13572e-18	RHOH
ENSG00000168283	-2.72624	0	0	BMI1
ENSG00000178038	1.44118	1.58526e-29	1.85097e-28	ALS2CL
ENSG00000159712	1.66574	6.82622e-15	4.83413e-14	ANKRD18CP
ENSG00000136770	-1.48818	0	0	DNAJC1
ENSG00000130477	-1.1598	3.27682e-120	1.58542e-118	UNC13A
ENSG00000174808	1.76857	3.96183e-15	2.83136e-14	BTC
ENSG00000170091	-3.40021	1.74367e-97	6.52215e-96	HMP19
ENSG00000168000	1.11302	9.19545e-119	4.35029e-117	BSCL2
ENSG00000169330	1.15063	1.74184e-21	1.58435e-20	KIAA1024
ENSG00000030582	0.74335	4.55629e-50	8.44233e-49	GRN
ENSG00000174788	-1.54872	1.15286e-09	6.26037e-09	PCP2
ENSG00000177103	-2.83065	1.87598e-16	1.418e-15	DSCAML1
ENSG00000167778	0.976399	8.37912e-50	1.54362e-48	SPRYD3
ENSG00000167775	0.904819	9.16237e-66	2.23852e-64	CD320
ENSG00000167769	2.03658	6.90615e-54	1.37783e-52	ACER1
ENSG00000167740	-0.800148	1.07289e-13	7.19479e-13	CYB5D2
ENSG00000005379	-1.08243	1.01207e-138	5.97178e-137	BZRAP1
ENSG00000167700	0.735833	1.62518e-21	1.48076e-20	MFSD3
ENSG00000167676	-0.974066	3.53193e-06	1.50146e-05	PLIN4
ENSG00000167653	2.58864	1.04324e-30	1.25712e-29	PSCA
ENSG00000167646	-0.650978	8.37831e-22	7.70626e-21	DNAAF3
ENSG00000167617	2.86686	1.61159e-26	1.73537e-25	CDC42EP5
ENSG00000211455	0.795719	1.30635e-38	1.91732e-37	STK38L
ENSG00000078018	-5.83049	5.21984e-104	2.09718e-102	MAP2
ENSG00000162366	3.8463	1.83532e-46	3.15567e-45	PDZK1IP1
ENSG00000134531	2.73944	4.51157e-44	7.4068e-43	EMP1
ENSG00000236283	4.40821	8.17851e-46	1.38978e-44	AC013463.2
ENSG00000167525	-0.740015	7.27416e-07	3.28302e-06	PROCA1
ENSG00000178917	-0.588193	5.31025e-08	2.60192e-07	ZNF852
ENSG00000167397	1.00528	1.20257e-111	5.31209e-110	VKORC1
ENSG00000167394	0.637692	4.17429e-15	2.97987e-14	ZNF668
ENSG00000173914	-1.13289	3.50286e-42	5.54305e-41	RBM4B
ENSG00000167264	0.6409	3.28878e-08	1.63093e-07	DUS2
ENSG00000167105	3.86401	3.89347e-48	6.93688e-47	TMEM92
ENSG00000106689	-1.80927	5.73821e-13	3.71786e-12	LHX2
ENSG00000177076	-0.889284	1.01977e-15	7.48181e-15	ACER2
ENSG00000167037	3.0051	7.90867e-112	3.50315e-110	SGSM1
ENSG00000167004	0.599658	9.21259e-123	4.63981e-121	PDIA3
ENSG00000088808	0.850239	1.46819e-38	2.15287e-37	PPP1R13B
ENSG00000166961	-4.7633	5.57465e-44	9.13334e-43	MS4A15
ENSG00000166902	0.778635	3.32234e-50	6.16309e-49	MRPL16
ENSG00000172201	1.85699	2.25646e-09	1.20313e-08	ID4
ENSG00000166828	-1.36662	1.4418e-06	6.353e-06	SCNN1G
ENSG00000166821	1.27426	2.43872e-77	7.02637e-76	PEX11A
ENSG00000217930	0.618696	8.96036e-13	5.74847e-12	PAM16
ENSG00000179314	1.99994	4.58535e-07	2.09912e-06	WSCD1
ENSG00000108797	-1.03615	6.84605e-27	7.44453e-26	CNTNAP1
ENSG00000166780	1.07192	4.40091e-06	1.85705e-05	C16orf45
ENSG00000087253	1.37728	2.45768e-42	3.90652e-41	LPCAT2
ENSG00000152229	-0.870579	2.32841e-48	4.17169e-47	PSTPIP2
ENSG00000172345	-2.15792	4.42901e-46	7.57051e-45	STARD5
ENSG00000210127	0.592251	3.0898e-07	1.42961e-06	MT-TA
ENSG00000243649	1.60558	4.48008e-107	1.85593e-105	CFB
ENSG00000166557	0.93038	2.03374e-139	1.21119e-137	TMED3
ENSG00000166402	-2.22812	1.06648e-76	3.04528e-75	TUB
ENSG00000024526	-0.672157	1.2997e-40	1.98026e-39	DEPDC1
ENSG00000166317	1.40287	4.04661e-15	2.8913e-14	SYNPO2L
ENSG00000166206	-5.04721	3.46956e-156	2.32621e-154	GABRB3
ENSG00000166147	-0.737069	4.61048e-07	2.11002e-06	FBN1
ENSG00000166130	0.744579	1.04191e-31	1.28505e-30	IKBIP
ENSG00000109762	0.618793	3.94408e-27	4.31676e-26	SNX25
ENSG00000183760	-1.02923	1.23839e-09	6.71045e-09	PAPL
ENSG00000249550	3.12005	4.30678e-81	1.30308e-79	LINC01234
ENSG00000165863	-0.731461	2.01785e-36	2.80944e-35	C10orf82
ENSG00000155324	1.32725	3.12781e-50	5.80559e-49	GRAMD3
ENSG00000165672	0.61928	1.09727e-67	2.75015e-66	PRDX3
ENSG00000125378	1.57489	7.41672e-90	2.49678e-88	BMP4
ENSG00000165626	1.17354	0.000139618	0.000509078	BEND7
ENSG00000160360	-1.45353	9.14907e-119	4.33476e-117	GPSM1
ENSG00000112699	0.800099	1.95603e-22	1.83718e-21	GMDS
ENSG00000198598	1.67611	2.08684e-12	1.31687e-11	MMP17
ENSG00000165507	-1.29308	2.42299e-08	1.21305e-07	C10orf10
ENSG00000165449	2.31424	1.01076e-39	1.51406e-38	SLC16A9
ENSG00000121851	-0.728703	2.03558e-20	1.78258e-19	POLR3GL
ENSG00000165443	-3.41849	1.42962e-18	1.17082e-17	PHYHIPL
ENSG00000165434	-2.26675	0	0	PGM2L1
ENSG00000168491	1.05208	7.65382e-10	4.20074e-09	CCDC110
ENSG00000165349	2.35276	5.55204e-10	3.07357e-09	SLC7A3
ENSG00000171723	0.685043	6.14643e-25	6.28217e-24	GPHN
ENSG00000165238	-1.266	1.2302e-12	7.85293e-12	WNK2
ENSG00000165195	0.603478	4.66551e-21	4.18417e-20	PIGA
ENSG00000172318	1.54602	1.80049e-24	1.81131e-23	B3GALT1
ENSG00000170522	1.09287	1.12406e-100	4.3627e-99	ELOVL6
ENSG00000165164	-2.16348	1.47045e-08	7.47638e-08	CFAP47
ENSG00000165118	-1.03985	0.000269452	0.000953142	C9orf64
ENSG00000111962	1.14315	8.29307e-74	2.26878e-72	UST
ENSG00000165029	1.53815	6.66712e-67	1.6516e-65	ABCA1
ENSG00000164989	-0.677068	5.66115e-18	4.53076e-17	CCDC171
ENSG00000164938	-3.00667	2.66346e-68	6.72155e-67	TP53INP1
ENSG00000260572	-0.677433	3.29608e-06	1.40624e-05	RP11-16N11.2
ENSG00000153208	1.25491	2.54638e-15	1.83828e-14	MERTK
ENSG00000179331	-1.20251	1.22602e-23	1.19614e-22	RAB39A
ENSG00000182568	1.90386	4.67096e-10	2.5975e-09	SATB1
ENSG00000237732	-1.77882	3.58066e-09	1.89059e-08	AC010980.2
ENSG00000164591	-1.10408	5.75062e-06	2.40249e-05	MYOZ3
ENSG00000248593	0.602359	4.15403e-05	0.000160273	DSTNP2
ENSG00000251247	-0.970675	2.03782e-14	1.41339e-13	ZNF345
ENSG00000164430	0.964802	1.33431e-06	5.89646e-06	MB21D1
ENSG00000166228	1.47823	7.85843e-194	7.11956e-192	PCBD1
ENSG00000164318	-2.6798	6.30354e-16	4.66759e-15	EGFLAM
ENSG00000169432	2.04099	2.71883e-26	2.9032e-25	SCN9A
ENSG00000101460	0.636918	5.54292e-11	3.25561e-10	MAP1LC3A
ENSG00000164414	0.746037	3.5821e-69	9.12821e-68	SLC35A1
ENSG00000014914	0.706149	4.84724e-18	3.89105e-17	MTMR11
ENSG00000106028	0.600606	7.60912e-56	1.57506e-54	SSBP1
ENSG00000115652	1.21687	1.01595e-36	1.4307e-35	UXS1
ENSG00000164125	6.66673	1.0179e-113	4.59145e-112	FAM198B
ENSG00000164078	1.24572	7.47379e-12	4.56928e-11	MST1R
ENSG00000164076	-1.67223	3.16986e-05	0.00012384	CAMKV
ENSG00000237036	-1.34667	2.1256e-26	2.2804e-25	ZEB1-AS1
ENSG00000225439	-0.86202	2.30557e-11	1.37951e-10	BOLA3-AS1
ENSG00000135116	1.71932	7.87198e-41	1.20514e-39	HRK
ENSG00000227646	2.42114	8.30879e-11	4.83221e-10	STEAP2-AS1
ENSG00000071967	0.594857	3.12401e-08	1.55259e-07	CYBRD1
ENSG00000028203	0.669028	2.17093e-100	8.4054e-99	VEZT
ENSG00000188755	1.44868	0.000237765	0.000846013	TBC1D3P2
ENSG00000163898	3.02872	0	0	LIPH
ENSG00000139410	1.08992	2.00956e-34	2.64042e-33	SDSL
ENSG00000170775	-1.39489	3.19056e-55	6.54086e-54	GPR37
ENSG00000188112	2.08787	2.44316e-98	9.25768e-97	C6orf132
ENSG00000174804	-1.15487	3.8251e-140	2.30378e-138	FZD4
ENSG00000139343	0.709164	7.28763e-47	1.26118e-45	SNRPF
ENSG00000163697	-1.18742	1.51186e-195	1.38145e-193	APBB2
ENSG00000163683	0.809244	2.52742e-149	1.62308e-147	SMIM14
ENSG00000104140	1.93882	2.30635e-100	8.91891e-99	RHOV
ENSG00000163623	-1.7361	7.56125e-41	1.15868e-39	NKX6-1
ENSG00000126262	1.83834	0	0	FFAR2
ENSG00000163596	-0.774561	1.87404e-22	1.76224e-21	ICA1L
ENSG00000163541	0.659571	1.33622e-56	2.80589e-55	SUCLG1
ENSG00000272913	-1.45331	2.66154e-19	2.23879e-18	RP11-440D17.3
ENSG00000163864	-1.44103	3.57888e-167	2.66177e-165	NMNAT3
ENSG00000163517	-0.689948	3.21958e-28	3.63835e-27	HDAC11
ENSG00000163513	1.077	0.00023521	0.000837479	TGFBR2
ENSG00000067057	2.58098	5.79257e-80	1.72488e-78	PFKP
ENSG00000163435	1.33955	9.05224e-109	3.83443e-107	ELF3
ENSG00000232810	1.8106	1.8639e-12	1.18015e-11	TNF
ENSG00000143013	-1.57624	5.29346e-153	3.4549e-151	LMO4
ENSG00000175920	-3.01828	5.98755e-97	2.21886e-95	DOK7
ENSG00000102897	0.824034	7.93592e-51	1.49469e-49	LYRM1
ENSG00000163257	-0.849343	2.56244e-102	1.01047e-100	DCAF16
ENSG00000163235	-0.839464	6.59035e-21	5.89061e-20	TGFA
ENSG00000257702	1.16704	8.47565e-12	5.17191e-11	LBX2-AS1
ENSG00000163220	4.21249	2.90693e-60	6.50116e-59	S100A9
ENSG00000172260	0.877883	1.13767e-19	9.7257e-19	NEGR1
ENSG00000166922	0.891501	0.00015275	0.000555441	SCG5
ENSG00000163171	-1.48355	2.44332e-47	4.27461e-46	CDC42EP3
ENSG00000085552	-1.8058	1.43295e-123	7.26263e-122	IGSF9
ENSG00000203635	0.825775	6.97683e-06	2.89173e-05	AC144450.2
ENSG00000163141	0.721292	2.25491e-07	1.05507e-06	BNIPL
ENSG00000277117	1.01583	2.15749e-12	1.36039e-11	CH507-9B2.1
ENSG00000205086	-1.00526	4.4538e-05	0.00017126	C2orf91
ENSG00000186510	2.21374	1.2069e-24	1.22183e-23	CLCNKA
ENSG00000166006	-6.09578	1.40069e-208	1.38257e-206	KCNC2
ENSG00000158427	-0.944122	0.000123707	0.000453753	TMSB15B
ENSG00000166816	0.712437	1.10847e-05	4.51188e-05	LDHD
ENSG00000162894	-2.93459	3.63069e-15	2.60285e-14	FCMR
ENSG00000162892	-1.69337	6.0187e-06	2.51023e-05	IL24
ENSG00000135824	2.57943	3.10052e-16	2.32328e-15	RGS8
ENSG00000102265	-6.51202	3.30233e-98	1.24542e-96	TIMP1
ENSG00000162782	1.07822	1.19355e-06	5.29577e-06	TDRD5
ENSG00000151025	-6.9562	1.93159e-146	1.21843e-144	GPR158
ENSG00000162745	-2.80423	2.67592e-57	5.69007e-56	OLFML2B
ENSG00000178409	0.752274	1.79635e-49	3.29221e-48	BEND3
ENSG00000124429	-1.71384	6.487e-41	9.96928e-40	POF1B
ENSG00000103544	1.14666	1.03084e-190	9.13224e-189	C16orf62
ENSG00000157693	0.70809	6.57171e-40	9.87641e-39	C9orf91
ENSG00000184160	-1.67817	1.04902e-74	2.90717e-73	ADRA2C
ENSG00000114019	-0.739387	3.07516e-32	3.85371e-31	AMOTL2
ENSG00000162434	-0.650577	1.69178e-125	8.74067e-124	JAK1
ENSG00000162426	-1.30354	8.30531e-10	4.55127e-09	SLC45A1
ENSG00000162733	0.880357	1.80591e-07	8.50836e-07	DDR2
ENSG00000251602	-0.845772	4.16989e-15	2.97739e-14	RP11-521B24.3
ENSG00000162302	-0.618053	9.14387e-11	5.30437e-10	RPS6KA4
ENSG00000162104	0.664457	2.03313e-32	2.5599e-31	ADCY9
ENSG00000273036	1.49543	0.000118791	0.000436922	FAM95C
ENSG00000167680	-3.50775	1.3989e-77	4.04503e-76	SEMA6B
ENSG00000161999	0.812523	1.19848e-53	2.38065e-52	JMJD8
ENSG00000167968	0.806457	1.02435e-08	5.26175e-08	DNASE1L2
ENSG00000161981	0.625698	9.33355e-35	1.2427e-33	SNRNP25
ENSG00000160963	-2.83312	1.56034e-21	1.42209e-20	COL26A1
ENSG00000161912	-1.051	2.68633e-05	0.000105763	ADCY10P1
ENSG00000161682	-0.881547	1.28783e-17	1.01694e-16	FAM171A2
ENSG00000161647	-0.850688	3.78975e-37	5.38667e-36	MPP3
ENSG00000177542	1.66157	2.45752e-233	2.94359e-231	SLC25A22
ENSG00000261888	-1.86373	2.00951e-10	1.14109e-09	AC144831.1
ENSG00000177173	-1.14809	1.88162e-10	1.07056e-09	NAP1L4P1
ENSG00000161328	-0.808508	1.94884e-17	1.52872e-16	LRRC56
ENSG00000205838	-1.41491	1.26647e-09	6.8533e-09	TTC23L
ENSG00000148400	0.891965	5.57121e-19	4.6363e-18	NOTCH1
ENSG00000261538	1.56262	1.48647e-07	7.06476e-07	RP11-3M1.1
ENSG00000161016	0.716325	1.3851e-73	3.76994e-72	RPL8
ENSG00000082397	1.66125	1.12601e-65	2.74473e-64	EPB41L3
ENSG00000136531	2.96132	6.93495e-18	5.53774e-17	SCN2A
ENSG00000160867	1.1416	1.75651e-198	1.62826e-196	FGFR4
ENSG00000160862	7.37849	0	0	AZGP1
ENSG00000162599	2.20362	1.83155e-125	9.44754e-124	NFIA
ENSG00000160746	0.869999	1.86028e-66	4.57996e-65	ANO10
ENSG00000149115	1.09405	8.07706e-166	5.87074e-164	TNKS1BP1
ENSG00000160716	-1.90329	5.01101e-168	3.77965e-166	CHRNB2
ENSG00000160678	1.8175	1.78452e-20	1.56616e-19	S100A1
ENSG00000160584	-1.08307	1.0778e-34	1.43263e-33	SIK3
ENSG00000158089	-1.16449	2.06681e-91	7.06182e-90	GALNT14
ENSG00000164403	-1.20149	3.09777e-21	2.79384e-20	SHROOM1
ENSG00000230695	-2.02146	5.16882e-07	2.35845e-06	AC012462.1
ENSG00000157110	1.15801	1.84723e-17	1.45151e-16	RBPMS
ENSG00000160321	-1.50589	5.92671e-49	1.07572e-47	ZNF208
ENSG00000166833	-1.96469	2.52625e-52	4.91137e-51	NAV2
ENSG00000160318	-0.782443	0.000217953	0.000779332	CLDND2
ENSG00000074964	0.610978	2.29539e-47	4.01799e-46	ARHGEF10L
ENSG00000167799	-0.666397	3.62304e-14	2.48325e-13	NUDT8
ENSG00000183336	0.966983	1.13172e-07	5.4247e-07	BOLA2
ENSG00000214216	-2.37908	2.5873e-09	1.37632e-08	IQCJ
ENSG00000160180	4.07631	0	0	TFF3
ENSG00000186951	-1.39479	4.91572e-106	2.01293e-104	PPARA
ENSG00000159899	-0.986142	0.000242802	0.000863071	NPR2
ENSG00000159784	-1.79072	6.91884e-07	3.12663e-06	FAM131B
ENSG00000159409	-2.12079	4.48681e-46	7.6652e-45	CELF3
ENSG00000008323	1.26583	3.62707e-30	4.31698e-29	PLEKHG6
ENSG00000177614	-2.48249	5.11728e-70	1.32087e-68	PGBD5
ENSG00000205181	-3.66518	2.78818e-45	4.6857e-44	LINC00654
ENSG00000159200	1.52274	2.64406e-175	2.07763e-173	RCAN1
ENSG00000159167	-2.3032	7.84715e-94	2.79706e-92	STC1
ENSG00000159082	-0.623181	7.07222e-17	5.42781e-16	SYNJ1
ENSG00000262814	0.804869	2.2352e-18	1.81847e-17	MRPL12
ENSG00000166128	1.41007	9.76021e-45	1.62404e-43	RAB8B
ENSG00000172382	0.593314	0.000167061	0.00060507	PRSS27
ENSG00000145014	-0.660389	1.28606e-14	8.99795e-14	TMEM44
ENSG00000052344	1.37858	1.90328e-173	1.48824e-171	PRSS8
ENSG00000075223	1.97341	0	0	SEMA3C
ENSG00000161921	0.797972	3.72478e-08	1.84229e-07	CXCL16
ENSG00000256304	1.36793	5.87406e-28	6.57307e-27	CCDC150P1
ENSG00000158296	1.38494	2.00238e-11	1.20034e-10	SLC13A3
ENSG00000186260	0.968799	2.67475e-111	1.1734e-109	MKL2
ENSG00000100206	-0.776756	6.42388e-07	2.91077e-06	DMC1
ENSG00000158220	-0.988303	2.86669e-07	1.331e-06	ESYT3
ENSG00000158201	0.602005	1.57812e-28	1.80003e-27	ABHD3
ENSG00000158050	-2.25394	4.5486e-86	1.47534e-84	DUSP2
ENSG00000168546	-1.86761	9.09875e-20	7.82013e-19	GFRA2
ENSG00000157927	-1.09467	6.17682e-17	4.76347e-16	RADIL
ENSG00000174307	-1.81784	1.54559e-76	4.40549e-75	PHLDA3
ENSG00000109472	1.12051	4.92467e-44	8.07672e-43	CPE
ENSG00000249430	-2.63866	3.738e-11	2.21584e-10	CTD-2231H16.1
ENSG00000157542	-0.655928	2.06975e-16	1.56078e-15	KCNJ6
ENSG00000141101	0.675967	6.47875e-11	3.78788e-10	NOB1
ENSG00000158286	-0.974005	1.14606e-09	6.22488e-09	RNF207
ENSG00000157483	1.48913	4.2974e-239	5.38962e-237	MYO1E
ENSG00000158815	-0.985211	5.72323e-13	3.70966e-12	FGF17
ENSG00000244701	0.649922	5.74267e-05	0.000218561	RP5-894A10.2
ENSG00000156968	0.947955	2.81482e-134	1.59611e-132	MPV17L
ENSG00000125089	1.57573	4.82815e-258	6.65556e-256	SH3TC1
ENSG00000156958	0.72156	3.78992e-32	4.73644e-31	GALK2
ENSG00000156804	-0.675491	2.57459e-23	2.48305e-22	FBXO32
ENSG00000177556	0.637906	5.62248e-38	8.13631e-37	ATOX1
ENSG00000152127	-0.863512	7.89187e-114	3.56483e-112	MGAT5
ENSG00000156709	0.970121	6.3736e-65	1.53953e-63	AIFM1
ENSG00000156689	0.604528	1.78888e-13	1.18866e-12	GLYATL2
ENSG00000136003	0.66091	2.87773e-56	6.00241e-55	ISCU
ENSG00000105329	-1.23591	1.17262e-14	8.22764e-14	TGFB1
ENSG00000257767	1.59139	2.3471e-13	1.54896e-12	RP11-162P23.2
ENSG00000156535	-4.45971	8.14656e-140	4.87893e-138	CD109
ENSG00000261963	-2.13246	1.20598e-08	6.16998e-08	RP11-74E22.4
ENSG00000156509	-0.618299	4.16677e-06	1.76103e-05	FBXO43
ENSG00000156453	-1.33233	8.13483e-165	5.85946e-163	PCDH1
ENSG00000177398	0.930787	5.84005e-07	2.65375e-06	UMODL1
ENSG00000218549	3.07459	9.52027e-24	9.33092e-23	OR4K12P
ENSG00000156284	-1.77695	5.46769e-16	4.05807e-15	CLDN8
ENSG00000179388	-2.08029	3.9713e-30	4.72317e-29	EGR3
ENSG00000128011	-1.29531	3.65546e-10	2.04451e-09	LRFN1
ENSG00000161955	0.831154	6.3648e-11	3.72398e-10	TNFSF13
ENSG00000156103	-6.63215	0	0	MMP16
ENSG00000156096	9.69575	0	0	UGT2B4
ENSG00000144893	-1.46444	8.10674e-32	1.00411e-30	MED12L
ENSG00000228184	2.08478	1.71772e-07	8.11198e-07	SNX19P1
ENSG00000155980	-1.17635	3.12038e-16	2.33761e-15	KIF5A
ENSG00000174928	0.589143	3.03599e-12	1.89748e-11	C3orf33
ENSG00000135480	0.786635	5.54725e-95	2.01599e-93	KRT7
ENSG00000165424	-0.887244	2.30322e-09	1.22766e-08	ZCCHC24
ENSG00000025434	0.641532	7.63201e-06	3.15267e-05	NR1H3
ENSG00000155850	-0.800051	1.488e-17	1.17182e-16	SLC26A2
ENSG00000155849	2.92806	7.35238e-68	1.84565e-66	ELMO1
ENSG00000151725	-0.650732	1.68908e-55	3.48058e-54	CENPU
ENSG00000155660	0.773017	1.82338e-138	1.07391e-136	PDIA4
ENSG00000140548	0.769875	1.97915e-39	2.9467e-38	ZNF710
ENSG00000006715	0.804398	1.59665e-106	6.57175e-105	VPS41
ENSG00000168386	1.17381	9.6168e-08	4.63255e-07	FILIP1L
ENSG00000155158	1.73225	2.83054e-183	2.36972e-181	TTC39B
ENSG00000155115	0.863718	8.7181e-73	2.34297e-71	GTF3C6
ENSG00000180667	-0.795249	1.07647e-33	1.39435e-32	YOD1
ENSG00000155093	-0.60763	8.65943e-42	1.35687e-40	PTPRN2
ENSG00000178462	4.1192	1.04529e-47	1.84083e-46	TUBAL3
ENSG00000170037	-0.627271	4.73194e-25	4.85506e-24	CNTROB
ENSG00000143153	-1.88934	0	0	ATP1B1
ENSG00000088340	-1.09256	4.78592e-55	9.77386e-54	FER1L4
ENSG00000154537	1.0482	9.54251e-12	5.81072e-11	FAM27C
ENSG00000164104	-0.585063	4.69233e-121	2.30161e-119	HMGB2
ENSG00000157315	1.79077	1.45573e-09	7.85749e-09	TMED6
ENSG00000070778	-1.49806	8.28442e-07	3.72478e-06	PTPN21
ENSG00000171444	-1.40936	1.17577e-269	1.74084e-267	MCC
ENSG00000154059	0.64169	9.65732e-44	1.57256e-42	IMPACT
ENSG00000154040	-1.18739	1.15696e-20	1.02212e-19	CABYR
ENSG00000279427	1.76285	4.82057e-09	2.52525e-08	RP11-132F7.2
ENSG00000153956	3.50277	3.33707e-81	1.01159e-79	CACNA2D1
ENSG00000153832	0.990512	2.89747e-16	2.17368e-15	FBXO36
ENSG00000074211	-1.11337	5.56932e-83	1.73938e-81	PPP2R2C
ENSG00000174227	0.805068	6.08951e-60	1.35524e-58	PIGG
ENSG00000153714	-0.601685	1.807e-36	2.52247e-35	LURAP1L
ENSG00000153446	1.56824	2.74654e-08	1.3701e-07	C16orf89
ENSG00000174109	0.714625	3.31494e-15	2.38022e-14	C16orf91
ENSG00000181449	-2.33526	1.31254e-14	9.17917e-14	SOX2
ENSG00000104432	0.97396	7.21631e-15	5.10247e-14	IL7
ENSG00000278272	-1.30493	7.89614e-06	3.25672e-05	HIST1H3C
ENSG00000153132	2.82136	3.17666e-112	1.41692e-110	CLGN
ENSG00000153130	0.659028	1.59975e-72	4.27058e-71	SCOC
ENSG00000185052	-3.16007	1.50267e-189	1.31303e-187	SLC24A3
ENSG00000153094	-1.69942	1.89753e-146	1.1993e-144	BCL2L11
ENSG00000153093	0.828834	2.62763e-05	0.000103541	ACOXL
ENSG00000148450	0.619705	6.33619e-24	6.26004e-23	MSRB2
ENSG00000153066	1.2734	3.14158e-89	1.05095e-87	TXNDC11
ENSG00000152990	0.804074	5.1692e-47	8.97482e-46	ADGRA3
ENSG00000152954	-2.92725	3.50868e-17	2.73219e-16	NRSN1
ENSG00000152953	-1.01709	7.95776e-201	7.50729e-199	STK32B
ENSG00000116001	-0.67168	1.12139e-49	2.0611e-48	TIA1
ENSG00000268100	1.31058	5.3253e-06	2.23004e-05	ZNF725P
ENSG00000152642	0.9711	1.05148e-119	5.04157e-118	GPD1L
ENSG00000149328	3.5804	4.65509e-208	4.5667e-206	GLB1L2
ENSG00000152413	1.71892	2.17195e-143	1.33579e-141	HOMER1
ENSG00000152377	-3.63942	2.61685e-45	4.40239e-44	SPOCK1
ENSG00000141469	2.10688	7.83867e-92	2.68979e-90	SLC14A1
ENSG00000197565	-1.02741	6.87161e-08	3.33527e-07	COL4A6
ENSG00000168301	-1.44575	3.4831e-105	1.41541e-103	KCTD6
ENSG00000159459	0.816501	8.06067e-143	4.93847e-141	UBR1
ENSG00000151835	1.1688	1.1646e-24	1.17939e-23	SACS
ENSG00000151790	2.75051	2.01819e-21	1.82999e-20	TDO2
ENSG00000151746	-0.667632	2.93045e-07	1.35903e-06	BICD1
ENSG00000151689	1.54026	4.72147e-14	3.21613e-13	INPP1
ENSG00000136574	-2.58097	5.52033e-34	7.18834e-33	GATA4
ENSG00000165288	-0.746998	1.42338e-41	2.21622e-40	BRWD3
ENSG00000151655	1.56092	4.32281e-08	2.12787e-07	ITIH2
ENSG00000151640	-2.25334	1.14442e-79	3.38886e-78	DPYSL4
ENSG00000151575	-0.793332	4.71514e-26	4.99818e-25	TEX9
ENSG00000151552	-0.915803	4.29645e-21	3.85536e-20	QDPR
ENSG00000158985	0.731366	3.24551e-76	9.17723e-75	CDC42SE2
ENSG00000279838	-1.12484	5.25405e-06	2.20194e-05	RP4-635A23.6
ENSG00000127483	-0.655597	4.02303e-134	2.27717e-132	HP1BP3
ENSG00000151388	-2.05783	5.40241e-25	5.53409e-24	ADAMTS12
ENSG00000151365	-1.19403	1.15577e-09	6.27441e-09	THRSP
ENSG00000156171	0.667465	2.2592e-38	3.29915e-37	DRAM2
ENSG00000169129	-2.66127	1.17567e-132	6.57329e-131	AFAP1L2
ENSG00000184254	3.76461	3.73422e-29	4.32853e-28	ALDH1A3
ENSG00000218357	1.90787	1.38073e-08	7.03473e-08	LL22NC03-75H12.2
ENSG00000151117	0.962558	1.30452e-51	2.49819e-50	TMEM86A
ENSG00000151033	2.21007	3.2372e-09	1.71377e-08	LYZL2
ENSG00000232599	3.66965	7.13133e-21	6.36171e-20	RP1-161N10.1
ENSG00000151012	1.04765	3.28748e-35	4.41566e-34	SLC7A11
ENSG00000150995	0.735731	9.76377e-63	2.27591e-61	ITPR1
ENSG00000182993	0.729479	8.556e-10	4.68383e-09	C12orf60
ENSG00000150938	-0.787808	8.25527e-69	2.09533e-67	CRIM1
ENSG00000150907	1.05436	4.56596e-16	3.3967e-15	FOXO1
ENSG00000276644	1.62882	5.03854e-58	1.0873e-56	DACH1
ENSG00000136819	0.968547	1.28304e-142	7.84565e-141	C9orf78
ENSG00000150687	3.41063	0	0	PRSS23
ENSG00000150526	3.65419	5.11955e-93	1.7933e-91	MIA2
ENSG00000150281	1.00546	6.56658e-07	2.97248e-06	CTF1
ENSG00000150076	-0.620816	0.000138075	0.000503624	CCDC7
ENSG00000101890	1.09819	8.45367e-05	0.000316133	GUCY2F
ENSG00000163873	-2.39152	0	0	GRIK3
ENSG00000167889	-3.62839	3.68005e-55	7.53467e-54	MGAT5B
ENSG00000196090	-2.1217	1.06162e-07	5.10014e-07	PTPRT
ENSG00000158008	-1.55715	4.00878e-55	8.20249e-54	EXTL1
ENSG00000103266	0.60472	5.21717e-42	8.22734e-41	STUB1
ENSG00000197070	0.771673	6.55947e-64	1.55391e-62	ARRDC1
ENSG00000143344	-1.00974	0.00026439	0.000936168	RGL1
ENSG00000127824	2.72077	0	0	TUBA4A
ENSG00000065485	0.872064	2.1748e-20	1.90241e-19	PDIA5
ENSG00000109654	-1.93078	6.28139e-20	5.42933e-19	TRIM2
ENSG00000149295	-4.08879	2.84023e-157	1.92852e-155	DRD2
ENSG00000149294	-1.03943	5.35538e-31	6.51219e-30	NCAM1
ENSG00000149292	-0.587064	2.56863e-15	1.8535e-14	TTC12
ENSG00000274270	-0.982562	1.26587e-08	6.46291e-08	RP11-34F20.7
ENSG00000149260	-1.00663	2.12461e-47	3.72109e-46	CAPN5
ENSG00000149256	-2.50844	7.55432e-70	1.93896e-68	TENM4
ENSG00000184178	0.81921	4.93802e-35	6.61319e-34	SCFD2
ENSG00000149212	-3.9181	1.94111e-219	2.06928e-217	SESN3
ENSG00000153250	1.00967	2.526e-108	1.06295e-106	RBMS1
ENSG00000175497	-1.59789	3.69082e-73	9.98614e-72	DPP10
ENSG00000124299	-0.683302	3.96471e-28	4.46305e-27	PEPD
ENSG00000171722	-2.34583	1.0041e-09	5.47055e-09	C1orf111
ENSG00000148702	4.88395	0	0	HABP2
ENSG00000148671	2.45057	0	0	ADIRF
ENSG00000146205	1.27212	1.96191e-16	1.48191e-15	ANO7
ENSG00000108375	0.600527	1.33899e-50	2.51156e-49	RNF43
ENSG00000148498	-0.945761	2.45703e-120	1.19058e-118	PARD3
ENSG00000148444	-1.10643	1.02365e-104	4.12831e-103	COMMD3
ENSG00000148429	0.825902	2.55658e-42	4.0617e-41	USP6NL
ENSG00000148411	-0.84916	1.58648e-41	2.46537e-40	NACC2
ENSG00000164211	2.60585	1.86821e-120	9.08014e-119	STARD4
ENSG00000179476	0.643613	1.01327e-06	4.52148e-06	C14orf28
ENSG00000090581	0.603049	4.19431e-39	6.2015e-38	GNPTG
ENSG00000169223	0.68669	1.23048e-71	3.24151e-70	LMAN2
ENSG00000148123	3.28983	1.45871e-54	2.94886e-53	PLPPR1
ENSG00000148057	0.975548	1.5959e-11	9.61723e-11	IDNK
ENSG00000148053	-2.25047	1.99636e-10	1.13402e-09	NTRK2
ENSG00000147889	-0.845793	2.41134e-24	2.41368e-23	CDKN2A
ENSG00000147872	0.766597	5.54113e-12	3.41381e-11	PLIN2
ENSG00000147862	0.717976	3.84096e-40	5.80793e-39	NFIB
ENSG00000141622	-2.29017	1.42277e-66	3.51364e-65	RNF165
ENSG00000007174	-1.70686	1.01993e-10	5.8995e-10	DNAH9
ENSG00000142634	0.897906	1.24759e-46	2.15207e-45	EFHD2
ENSG00000104412	0.836087	2.44423e-65	5.93087e-64	EMC2
ENSG00000147654	1.08406	2.42581e-74	6.68791e-73	EBAG9
ENSG00000120137	-0.665699	6.51865e-167	4.82577e-165	PANK3
ENSG00000147535	0.814805	7.85827e-210	7.87822e-208	PLPP5
ENSG00000143369	0.925392	0.000101488	0.000376092	ECM1
ENSG00000181804	1.45056	0.000258194	0.00091595	SLC9A9
ENSG00000152270	1.99338	0	0	PDE3B
ENSG00000147394	-1.36767	1.5426e-34	2.0386e-33	ZNF185
ENSG00000258929	1.18963	1.61592e-07	7.6482e-07	NA
ENSG00000173567	1.6462	3.95405e-28	4.45263e-27	ADGRF3
ENSG00000147251	1.14612	5.89852e-06	2.46203e-05	DOCK11
ENSG00000147234	-2.00173	7.34925e-16	5.42809e-15	FRMPD3
ENSG00000147180	-2.64959	8.5344e-156	5.69809e-154	ZNF711
ENSG00000147100	-0.60596	3.39577e-27	3.72173e-26	SLC16A2
ENSG00000140403	-0.635798	1.29648e-36	1.82093e-35	DNAJA4
ENSG00000147027	-0.81062	2.5999e-12	1.63194e-11	TMEM47
ENSG00000146955	1.24891	1.71485e-11	1.03107e-10	RAB19
ENSG00000055163	0.588939	3.3898e-17	2.64091e-16	CYFIP2
ENSG00000183049	-2.05717	1.40672e-74	3.88836e-73	CAMK1D
ENSG00000214922	-1.06256	5.62974e-07	2.56146e-06	HLA-F-AS1
ENSG00000158445	-2.2358	1.2535e-69	3.20704e-68	KCNB1
ENSG00000222038	3.79136	7.28425e-22	6.7096e-21	POTEJ
ENSG00000101665	-0.683522	3.16972e-24	3.15208e-23	SMAD7
ENSG00000128266	-1.70922	3.40238e-69	8.67715e-68	GNAZ
ENSG00000140987	0.893071	2.60279e-45	4.38105e-44	ZSCAN32
ENSG00000131398	-1.79539	7.37469e-11	4.30069e-10	KCNC3
ENSG00000164077	0.855105	4.29898e-16	3.20554e-15	MON1A
ENSG00000146122	-1.6315	1.30253e-15	9.50839e-15	DAAM2
ENSG00000148143	-1.04573	1.62284e-70	4.22639e-69	ZNF462
ENSG00000249158	-0.686666	1.41668e-05	5.70974e-05	PCDHA11
ENSG00000073910	-0.722792	4.56678e-34	5.95394e-33	FRY
ENSG00000122912	0.917319	8.29989e-84	2.61259e-82	SLC25A16
ENSG00000128340	-1.81526	6.72662e-06	2.79237e-05	RAC2
ENSG00000145920	-4.55113	0	0	CPLX2
ENSG00000166997	0.977608	1.02302e-58	2.23326e-57	CNPY4
ENSG00000187391	-1.07937	9.7881e-37	1.37961e-35	MAGI2
ENSG00000197763	3.74595	1.67586e-28	1.91072e-27	TXNRD3
ENSG00000145860	1.04499	2.71653e-75	7.58753e-74	RNF145
ENSG00000249859	-2.96761	3.58702e-54	7.19226e-53	PVT1
ENSG00000204568	0.594803	7.14391e-33	9.07345e-32	MRPS18B
ENSG00000182118	1.72582	1.54846e-06	6.81174e-06	FAM89A
ENSG00000211454	1.05183	2.70276e-27	2.97545e-26	AKR7L
ENSG00000108846	-3.10202	1.76339e-217	1.8551e-215	ABCC3
ENSG00000187510	3.42679	2.99979e-34	3.91897e-33	PLEKHG7
ENSG00000145687	-0.66103	5.1519e-88	1.70739e-86	SSBP2
ENSG00000079308	-1.17015	3.19155e-48	5.70217e-47	TNS1
ENSG00000155957	0.613938	2.42459e-35	3.27315e-34	TMBIM4
ENSG00000145569	-0.859839	1.44892e-08	7.36924e-08	FAM105A
ENSG00000133124	-1.46938	7.62649e-15	5.38535e-14	IRS4
ENSG00000129925	0.655343	4.63121e-33	5.91564e-32	TMEM8A
ENSG00000119698	1.93907	2.38306e-19	2.0093e-18	PPP4R4
ENSG00000145476	1.504	6.24461e-219	6.63484e-217	CYP4V2
ENSG00000145365	-1.10837	1.78496e-33	2.30274e-32	TIFA
ENSG00000145349	2.06879	0	0	CAMK2D
ENSG00000170153	-1.39993	5.776e-25	5.90923e-24	RNF150
ENSG00000163376	0.883236	3.62665e-17	2.82336e-16	KBTBD8
ENSG00000142235	-0.642214	4.34289e-09	2.28287e-08	LMTK3
ENSG00000149289	3.3914	8.86881e-30	1.04354e-28	ZC3H12C
ENSG00000023902	-1.82011	5.74099e-69	1.45948e-67	PLEKHO1
ENSG00000145012	-1.10139	2.06058e-117	9.60631e-116	LPP
ENSG00000137975	6.24319	0	0	CLCA2
ENSG00000164597	0.736675	5.46819e-85	1.74529e-83	COG5
ENSG00000144959	0.924697	2.54238e-53	5.02832e-52	NCEH1
ENSG00000144935	1.42479	9.18917e-31	1.10981e-29	TRPC1
ENSG00000172366	0.60399	7.50315e-20	6.46962e-19	FAM195A
ENSG00000144867	0.64149	1.72505e-50	3.22624e-49	SRPRB
ENSG00000151881	0.678167	7.63539e-16	5.63163e-15	C5orf28
ENSG00000144857	-1.51018	7.56085e-34	9.81345e-33	BOC
ENSG00000230555	-1.17222	0.00012336	0.000452585	RP11-517P14.2
ENSG00000144837	1.75798	1.52386e-21	1.38963e-20	PLA1A
ENSG00000144824	4.8366	1.09689e-198	1.01976e-196	PHLDB2
ENSG00000144821	-2.1188	1.02281e-09	5.56869e-09	MYH15
ENSG00000144791	0.639438	2.12715e-72	5.66904e-71	LIMD1
ENSG00000207611	-1.79967	2.36842e-06	1.02399e-05	MIR149
ENSG00000170412	1.9461	0	0	GPRC5C
ENSG00000138085	0.70833	1.22124e-85	3.94511e-84	ATRAID
ENSG00000144668	1.62177	4.18786e-51	7.93906e-50	ITGA9
ENSG00000159763	2.61272	1.09847e-19	9.40066e-19	PIP
ENSG00000144645	1.10644	9.9394e-31	1.19861e-29	OSBPL10
ENSG00000144619	-0.951814	2.66417e-06	1.14643e-05	CNTN4
ENSG00000177383	-0.905167	2.4932e-109	1.0603e-107	MAGEF1
ENSG00000144485	-0.591737	2.88431e-19	2.42362e-18	HES6
ENSG00000144476	-2.04833	3.74655e-78	1.09623e-76	ACKR3
ENSG00000144452	0.947019	2.30719e-08	1.15616e-07	ABCA12
ENSG00000144369	-1.47731	1.5146e-131	8.32277e-130	FAM171B
ENSG00000261342	-1.27377	2.05254e-23	1.98555e-22	AC006538.1
ENSG00000175264	2.42949	4.69922e-24	4.65425e-23	CHST1
ENSG00000166986	0.629685	2.35085e-94	8.45696e-93	MARS
ENSG00000170190	1.6151	6.22712e-12	3.82686e-11	SLC16A5
ENSG00000144278	-0.640249	1.27226e-09	6.88228e-09	GALNT13
ENSG00000144191	1.77622	1.30167e-11	7.88125e-11	CNGA3
ENSG00000144115	1.14154	2.26197e-52	4.40561e-51	THNSL2
ENSG00000240216	-0.962734	2.01117e-05	7.99892e-05	CPHL1P
ENSG00000145934	-1.12094	1.64806e-83	5.17238e-82	TENM2
ENSG00000143257	0.818353	1.75558e-06	7.67746e-06	NR1I3
ENSG00000143845	-0.818459	2.73814e-80	8.1993e-79	ETNK2
ENSG00000143816	-1.69351	3.52706e-22	3.28477e-21	WNT9A
ENSG00000108684	-2.12568	3.3284e-18	2.68666e-17	ASIC2
ENSG00000203867	0.992614	6.82691e-05	0.000257466	RBM20
ENSG00000143774	0.644567	2.59092e-61	5.8683e-60	GUK1
ENSG00000143753	1.07133	3.97603e-112	1.76853e-110	DEGS1
ENSG00000144649	-1.09858	1.20732e-115	5.57162e-114	FAM198A
ENSG00000143669	1.29642	3.19464e-111	1.39956e-109	LYST
ENSG00000146215	-1.50468	0.000175033	0.000632726	CRIP3
ENSG00000143630	-0.769171	1.2343e-22	1.16968e-21	HCN3
ENSG00000176973	-0.635437	9.50911e-07	4.25171e-06	FAM89B
ENSG00000119950	0.640018	8.5719e-36	1.17053e-34	MXI1
ENSG00000143570	0.778695	2.93697e-110	1.26758e-108	SLC39A1
ENSG00000122694	0.90825	2.53702e-15	1.83193e-14	GLIPR2
ENSG00000143536	6.94622	3.12908e-107	1.29794e-105	CRNN
ENSG00000143512	4.39964	0	0	HHIPL2
ENSG00000269069	0.705556	0.000269508	0.000953234	CTC-471F3.5
ENSG00000143499	-1.62203	3.30035e-92	1.14354e-90	SMYD2
ENSG00000050165	-2.54872	6.06364e-11	3.55362e-10	DKK3
ENSG00000143450	0.62445	2.12677e-09	1.1372e-08	OAZ3
ENSG00000143401	-1.13766	4.19412e-113	1.88388e-111	ANP32E
ENSG00000159674	3.8867	1.17782e-218	1.24316e-216	SPON2
ENSG00000182220	0.632191	1.72202e-73	4.68298e-72	ATP6AP2
ENSG00000164638	1.52557	5.63028e-83	1.7567e-81	SLC29A4
ENSG00000171357	-1.24066	3.78632e-05	0.000146705	LURAP1
ENSG00000143248	1.12602	2.43533e-08	1.21904e-07	RGS5
ENSG00000174871	-1.42932	4.9354e-15	3.513e-14	CNIH2
ENSG00000143126	-1.1486	5.1639e-104	2.07732e-102	CELSR2
ENSG00000146072	0.753874	7.24437e-45	1.2092e-43	TNFRSF21
ENSG00000142973	-0.686112	6.60488e-06	2.74397e-05	CYP4B1
ENSG00000181690	1.36092	9.10126e-07	4.07543e-06	PLAG1
ENSG00000142621	1.03234	1.96983e-12	1.24549e-11	FHAD1
ENSG00000092140	-4.42092	0	0	G2E3
ENSG00000142530	-0.891034	1.7787e-10	1.01327e-09	FAM71E1
ENSG00000188001	-3.45004	5.01147e-48	8.89905e-47	TPRG1
ENSG00000142449	-2.69641	1.1955e-20	1.05588e-19	FBN3
ENSG00000159199	0.85137	6.65274e-63	1.55414e-61	ATP5G1
ENSG00000214215	3.17747	1.48285e-22	1.40057e-21	C12orf74
ENSG00000103978	0.681081	1.85146e-89	6.20015e-88	TMEM87A
ENSG00000142192	0.592877	8.83156e-82	2.68992e-80	APP
ENSG00000197457	-1.52001	2.09692e-296	3.54822e-294	STMN3
ENSG00000142185	0.743998	1.53302e-23	1.49111e-22	TRPM2
ENSG00000142168	0.610343	1.44242e-74	3.98361e-73	SOD1
ENSG00000142089	-2.3165	4.23809e-78	1.23779e-76	IFITM3
ENSG00000170266	0.947163	5.52913e-71	1.45059e-69	GLB1
ENSG00000168067	-0.609061	2.95697e-13	1.94302e-12	MAP4K2
ENSG00000151092	0.743035	1.91439e-44	3.16731e-43	NGLY1
ENSG00000141873	-0.592218	1.60439e-19	1.36064e-18	SLC39A3
ENSG00000163888	-1.81151	8.95674e-22	8.22883e-21	CAMK2N2
ENSG00000141753	1.01659	8.33511e-128	4.39152e-126	IGFBP4
ENSG00000141744	0.790483	2.32473e-13	1.53483e-12	PNMT
ENSG00000214274	1.31255	3.25735e-82	9.98785e-81	ANG
ENSG00000141582	0.715464	1.04668e-34	1.39185e-33	CBX4
ENSG00000141580	0.619909	7.87951e-50	1.45326e-48	WDR45B
ENSG00000138413	0.81608	2.46179e-111	1.08146e-109	IDH1
ENSG00000213347	-1.01221	2.47911e-70	6.43021e-69	MXD3
ENSG00000125170	-0.870563	5.45513e-23	5.21712e-22	DOK4
ENSG00000141542	1.23143	1.84465e-104	7.42996e-103	RAB40B
ENSG00000179292	-2.89462	7.01887e-15	4.96726e-14	TMEM151A
ENSG00000214530	1.39512	2.65314e-248	3.53542e-246	STARD10
ENSG00000115266	-0.926096	2.43046e-22	2.27743e-21	APC2
ENSG00000166165	-1.61956	2.40471e-110	1.04349e-108	CKB
ENSG00000141404	2.22826	4.73815e-113	2.12526e-111	GNAL
ENSG00000140374	0.68615	3.28462e-45	5.50841e-44	ETFA
ENSG00000169562	3.5212	1.6936e-38	2.47886e-37	GJB1
ENSG00000267056	-1.76581	3.33517e-06	1.42178e-05	AC005336.4
ENSG00000141349	0.71858	3.33726e-36	4.60833e-35	G6PC3
ENSG00000126391	-0.915396	1.55026e-34	2.04787e-33	FRMD8
ENSG00000198910	-4.09365	8.2584e-104	3.31383e-102	L1CAM
ENSG00000140992	0.702945	1.99649e-60	4.47753e-59	PDPK1
ENSG00000089356	1.57937	8.72401e-245	1.12501e-242	FXYD3
ENSG00000140990	0.981432	3.23713e-136	1.87209e-134	NDUFB10
ENSG00000140961	1.21461	3.36532e-14	2.31007e-13	OSGIN1
ENSG00000156504	-0.748773	1.58941e-22	1.49944e-21	FAM122B
ENSG00000164694	-3.21727	1.71896e-16	1.30116e-15	FNDC1
ENSG00000172915	-1.56294	2.32015e-190	2.04974e-188	NBEA
ENSG00000140853	-1.08284	2.87712e-07	1.33546e-06	NLRC5
ENSG00000103342	0.633845	4.68055e-62	1.0769e-60	GSPT1
ENSG00000140795	1.02145	9.89227e-15	6.95919e-14	MYLK3
ENSG00000167191	1.24419	1.21569e-07	5.81151e-07	GPRC5B
ENSG00000140682	0.671177	2.2253e-05	8.81876e-05	TGFB1I1
ENSG00000140675	-1.01246	4.4557e-05	0.000171313	SLC5A2
ENSG00000140650	1.73232	7.74415e-203	7.371e-201	PMM2
ENSG00000140632	0.786856	4.3218e-88	1.43675e-86	GLYR1
ENSG00000180739	-1.09993	1.66016e-06	7.28109e-06	S1PR5
ENSG00000177548	0.885225	2.72862e-49	4.98651e-48	RABEP2
ENSG00000140488	-4.58992	1.27591e-34	1.69034e-33	CELF6
ENSG00000140474	-0.74422	2.67625e-81	8.12812e-80	ULK3
ENSG00000158467	0.824159	2.49211e-34	3.26239e-33	AHCYL2
ENSG00000140451	-0.658328	5.52171e-14	3.74926e-13	PIF1
ENSG00000140443	-0.850414	1.76198e-48	3.16394e-47	IGF1R
ENSG00000140323	-2.42009	1.45589e-93	5.16196e-92	DISP2
ENSG00000140297	2.13074	2.47331e-62	5.70288e-61	GCNT3
ENSG00000140284	-0.824501	4.0429e-29	4.68124e-28	SLC27A2
ENSG00000140280	1.48053	7.80016e-07	3.51491e-06	LYSMD2
ENSG00000156463	-4.49686	1.04455e-59	2.31823e-58	SH3RF2
ENSG00000140264	1.24392	2.60101e-286	4.20115e-284	SERF2
ENSG00000140092	0.978359	5.99761e-05	0.000227694	FBLN5
ENSG00000106290	0.669477	7.3282e-41	1.12351e-39	TAF6
ENSG00000077585	-1.08814	3.31324e-57	7.01727e-56	GPR137B
ENSG00000140057	0.642446	4.42412e-06	1.8661e-05	AK7
ENSG00000005486	0.637358	3.43075e-39	5.07958e-38	RHBDD2
ENSG00000179958	1.28433	5.09141e-129	2.7138e-127	DCTPP1
ENSG00000188886	-1.68028	6.07496e-12	3.7355e-11	ASTL
ENSG00000176029	2.12276	2.62543e-24	2.62305e-23	C11orf16
ENSG00000103316	5.76603	0	0	CRYM
ENSG00000225138	0.992089	1.55634e-42	2.48493e-41	CTD-2228K2.7
ENSG00000166825	1.37285	0.000282809	0.000998182	ANPEP
ENSG00000236809	1.90753	1.28871e-06	5.70597e-06	SNX25P1
ENSG00000162078	1.3392	3.76298e-144	2.33678e-142	ZG16B
ENSG00000139985	1.64232	3.92182e-23	3.76648e-22	ADAM21
ENSG00000181652	-1.04304	1.14956e-10	6.62895e-10	ATG9B
ENSG00000198513	0.609467	0.00018777	0.000676593	ATL1
ENSG00000139970	-4.71778	1.43327e-85	4.62536e-84	RTN1
ENSG00000172348	1.88526	7.79674e-20	6.71734e-19	RCAN2
ENSG00000139926	1.19467	2.90375e-164	2.08685e-162	FRMD6
ENSG00000204710	1.61166	4.66821e-05	0.00017916	SPDYC
ENSG00000078900	-1.47622	2.64472e-54	5.31286e-53	TP73
ENSG00000223875	1.76333	3.25574e-06	1.3894e-05	NBEAP3
ENSG00000104760	2.08578	5.65074e-09	2.95095e-08	FGL1
ENSG00000169715	-1.93143	9.58993e-08	4.621e-07	MT1E
ENSG00000139679	-0.96341	1.77728e-21	1.61613e-20	LPAR6
ENSG00000139645	0.60476	3.33784e-23	3.20948e-22	ANKRD52
ENSG00000231721	1.55893	3.66956e-23	3.52632e-22	LINC-PINT
ENSG00000139567	1.78174	1.83007e-13	1.21527e-12	ACVRL1
ENSG00000139547	0.679877	1.20029e-12	7.66654e-12	RDH16
ENSG00000139445	2.09734	5.29812e-10	2.93757e-09	FOXN4
ENSG00000179698	-0.917984	3.78195e-11	2.24066e-10	WDR97
ENSG00000196705	-1.17073	6.70349e-231	7.85291e-229	ZNF431
ENSG00000100027	-1.63966	6.93217e-91	2.35598e-89	YPEL1
ENSG00000139318	1.16613	1.05374e-246	1.38113e-244	DUSP6
ENSG00000144355	0.884623	5.3141e-17	4.10905e-16	DLX1
ENSG00000161267	1.18601	1.63541e-112	7.30474e-111	BDH1
ENSG00000189120	0.942755	2.50272e-08	1.25179e-07	SP6
ENSG00000154473	-0.634972	1.61674e-93	5.7259e-92	BUB3
ENSG00000139192	0.747342	4.26139e-16	3.17825e-15	TAPBPL
ENSG00000139112	1.37725	2.29735e-38	3.35334e-37	GABARAPL1
ENSG00000164171	-0.919835	6.59075e-05	0.000248971	ITGA2
ENSG00000177169	-1.02526	4.66161e-61	1.05284e-59	ULK1
ENSG00000157851	-2.36133	1.80662e-197	1.66987e-195	DPYSL5
ENSG00000138829	-5.40314	3.93979e-112	1.75485e-110	FBN2
ENSG00000138821	-0.905649	2.32937e-07	1.08896e-06	SLC39A8
ENSG00000130956	0.907286	1.06656e-22	1.01335e-21	HABP4
ENSG00000157036	-0.971314	7.92523e-06	3.26788e-05	EXOG
ENSG00000138764	-0.619506	1.235e-36	1.73687e-35	CCNG2
ENSG00000148488	-0.751948	1.77809e-64	4.25956e-63	ST8SIA6
ENSG00000138744	0.596437	2.18726e-15	1.58332e-14	NAAA
ENSG00000158292	-0.921893	3.32643e-22	3.10063e-21	GPR153
ENSG00000138722	2.39468	1.86707e-09	1.00152e-08	MMRN1
ENSG00000138696	3.31091	6.68895e-45	1.11766e-43	BMPR1B
ENSG00000138678	-2.2794	3.87219e-63	9.10563e-62	GPAT3
ENSG00000118508	-1.07819	4.50664e-47	7.83725e-46	RAB32
ENSG00000050628	-4.0066	4.20978e-45	7.05255e-44	PTGER3
ENSG00000155368	0.916309	3.10614e-122	1.5449e-120	DBI
ENSG00000168394	1.30711	1.53313e-34	2.02692e-33	TAP1
ENSG00000278934	-1.35055	0.000174926	0.000632413	CTD-2006M22.2
ENSG00000153823	-2.45668	2.43215e-33	3.12882e-32	PID1
ENSG00000138376	-0.693755	3.95169e-86	1.28434e-84	BARD1
ENSG00000138172	-0.911071	6.43691e-38	9.30645e-37	CALHM2
ENSG00000082196	-1.07696	5.00309e-13	3.25542e-12	C1QTNF3
ENSG00000104324	-1.72959	3.01191e-38	4.38634e-37	CPQ
ENSG00000138074	0.631534	1.21246e-52	2.3745e-51	SLC5A6
ENSG00000138061	-1.31794	1.9365e-237	2.38196e-235	CYP1B1
ENSG00000165868	-0.638425	1.50836e-17	1.18727e-16	HSPA12A
ENSG00000138028	-2.79532	1.84688e-48	3.31454e-47	CGREF1
ENSG00000260902	-1.42867	9.40427e-05	0.0003498	RP11-95M5.1
ENSG00000137878	-1.50635	2.03035e-06	8.83436e-06	GCOM1
ENSG00000137877	0.662899	1.20411e-06	5.34027e-06	SPTBN5
ENSG00000158856	1.72272	7.75016e-19	6.41786e-18	DMTN
ENSG00000137842	2.21572	0	0	TMEM62
ENSG00000137834	2.29141	1.33598e-274	2.03457e-272	SMAD6
ENSG00000140299	-0.665917	6.68625e-52	1.2866e-50	BNIP2
ENSG00000137821	-0.691954	2.09967e-21	1.90279e-20	LRRC49
ENSG00000137817	-1.24412	7.86502e-126	4.0833e-124	PARP6
ENSG00000137710	0.778972	1.394e-53	2.76389e-52	RDX
ENSG00000224973	-1.22431	0.000186417	0.000671829	LARGE-AS1
ENSG00000123685	1.60093	1.9602e-11	1.17572e-10	BATF3
ENSG00000146535	1.27763	2.44841e-127	1.28155e-125	GNA12
ENSG00000119640	-0.774777	4.89646e-25	5.02225e-24	ACYP1
ENSG00000165752	-1.12876	5.38297e-48	9.54813e-47	STK32C
ENSG00000166575	0.780214	1.11283e-52	2.18206e-51	TMEM135
ENSG00000109670	-1.04069	5.79941e-293	9.71051e-291	FBXW7
ENSG00000130695	-0.634836	5.7859e-62	1.3293e-60	CEP85
ENSG00000138279	0.590227	1.86889e-56	3.90902e-55	ANXA7
ENSG00000067113	1.26968	2.11344e-51	4.03041e-50	PLPP1
ENSG00000171943	-0.602587	1.58221e-18	1.29282e-17	SRGAP2C
ENSG00000154330	3.76438	3.81463e-97	1.4202e-95	PGM5
ENSG00000116977	-0.687134	3.06623e-87	1.00679e-85	LGALS8
ENSG00000106537	1.61287	0	0	TSPAN13
ENSG00000112294	-1.24233	3.94118e-41	6.07143e-40	ALDH5A1
ENSG00000108551	0.91167	1.41376e-06	6.23461e-06	RASD1
ENSG00000130635	1.42432	3.44931e-42	5.46371e-41	COL5A1
ENSG00000145431	4.81454	2.34065e-62	5.40478e-61	PDGFC
ENSG00000148672	0.689984	2.70177e-162	1.91586e-160	GLUD1
ENSG00000004399	0.729883	4.44896e-55	9.09151e-54	PLXND1
ENSG00000279289	1.09483	2.38178e-06	1.02962e-05	RP3-331H24.6
ENSG00000251580	-0.748434	6.21028e-05	0.000235433	RP11-539L10.3
ENSG00000117791	2.07343	3.52451e-85	1.12943e-83	2017-03-02
ENSG00000156298	3.41147	8.24568e-53	1.6218e-51	TSPAN7
ENSG00000117479	1.19811	1.54956e-204	1.48373e-202	SLC19A2
ENSG00000161082	-1.17798	2.5997e-26	2.7797e-25	CELF5
ENSG00000108187	2.25122	8.61462e-87	2.81414e-85	PBLD
ENSG00000121691	0.615163	1.15098e-58	2.51088e-57	CAT
ENSG00000146555	0.805927	4.51533e-05	0.000173564	SDK1
ENSG00000107742	-1.03116	0.000180641	0.000652188	SPOCK2
ENSG00000106799	0.760292	2.06059e-108	8.70537e-107	TGFBR1
ENSG00000169855	0.643183	1.86053e-22	1.75005e-21	ROBO1
ENSG00000185532	-2.8468	2.64213e-98	9.98792e-97	PRKG1
ENSG00000153179	0.594903	9.70912e-33	1.23119e-31	RASSF3
ENSG00000107679	3.05171	6.64662e-234	8.02134e-232	PLEKHA1
ENSG00000102189	0.685205	4.27142e-63	1.0015e-61	EEA1
ENSG00000198818	1.61066	5.84367e-126	3.04375e-124	SFT2D1
ENSG00000164818	0.591148	1.23611e-23	1.20562e-22	DNAAF5
ENSG00000181817	0.741148	1.88594e-14	1.3089e-13	LSM10
ENSG00000107562	-0.807413	1.27036e-54	2.57461e-53	CXCL12
ENSG00000125844	0.913325	1.18222e-130	6.40822e-129	RRBP1
ENSG00000169991	-1.03747	7.24681e-46	1.23211e-44	IFFO2
ENSG00000060140	1.28514	3.13987e-43	5.07922e-42	STYK1
ENSG00000111912	1.18414	1.53256e-112	6.85492e-111	NCOA7
ENSG00000177426	-1.12798	4.40492e-76	1.24337e-74	TGIF1
ENSG00000148175	1.16813	1.75589e-222	1.92312e-220	STOM
ENSG00000135406	-0.695794	5.73659e-07	2.60859e-06	PRPH
ENSG00000225708	1.76769	7.76073e-11	4.52005e-10	RP13-379L11.1
ENSG00000084710	-1.99872	3.54411e-140	2.13857e-138	EFR3B
ENSG00000107105	-0.887464	4.24455e-28	4.77135e-27	ELAVL2
ENSG00000128596	-1.30738	2.30813e-14	1.59706e-13	CCDC136
ENSG00000106829	2.51886	1.96134e-70	5.09135e-69	TLE4
ENSG00000230699	-3.46484	1.41445e-36	1.98401e-35	RP11-54O7.1
ENSG00000106804	2.61014	0	0	C5
ENSG00000172159	-4.39575	2.83061e-190	2.49382e-188	FRMD3
ENSG00000007062	2.31566	3.08205e-22	2.87955e-21	PROM1
ENSG00000164056	5.03241	0	0	SPRY1
ENSG00000106484	0.743088	2.01597e-54	4.06255e-53	MEST
ENSG00000181019	1.30893	4.83342e-261	6.77973e-259	NQO1
ENSG00000132669	0.986909	1.82295e-29	2.12618e-28	RIN2
ENSG00000249641	1.72757	1.7261e-05	6.9003e-05	HOXC13-AS
ENSG00000106305	0.696436	2.3332e-23	2.25228e-22	AIMP2
ENSG00000106266	0.70418	1.50489e-22	1.42096e-21	SNX8
ENSG00000160181	1.7573	1.37085e-06	6.05041e-06	TFF2
ENSG00000147799	0.628466	1.43417e-25	1.49743e-24	ARHGAP39
ENSG00000186458	-1.4464	0.000227704	0.000812474	DEFB132
ENSG00000106069	0.974464	1.00932e-89	3.39067e-88	CHN2
ENSG00000170703	2.12098	8.4594e-135	4.82246e-133	TTLL6
ENSG00000112902	0.657716	1.90132e-11	1.14104e-10	SEMA5A
ENSG00000173598	0.971898	0	0	NUDT4
ENSG00000103642	1.08244	2.21117e-42	3.51818e-41	LACTB
ENSG00000105875	0.626353	4.23827e-14	2.89377e-13	WDR91
ENSG00000135052	2.17813	0	0	GOLM1
ENSG00000105835	1.2172	5.66187e-246	7.3907e-244	NAMPT
ENSG00000206053	0.647077	1.35281e-96	4.9901e-95	HN1L
ENSG00000272449	-0.623288	0.000122707	0.000450343	RP3-395M20.12
ENSG00000139988	1.67469	8.09981e-06	3.33728e-05	RDH12
ENSG00000135519	-0.947218	3.98739e-18	3.2113e-17	KCNH3
ENSG00000139629	0.745726	1.75707e-176	1.39436e-174	GALNT6
ENSG00000183444	2.02329	1.44485e-22	1.36507e-21	OR7E38P
ENSG00000105662	-1.08664	5.91749e-32	7.36084e-31	CRTC1
ENSG00000105613	-2.65627	6.30709e-92	2.16889e-90	MAST1
ENSG00000135362	-1.23422	2.21813e-06	9.62002e-06	PRR5L
ENSG00000136147	0.819448	2.71e-14	1.86906e-13	PHF11
ENSG00000198075	4.9313	0	0	SULT1C4
ENSG00000146700	-1.78982	2.81976e-35	3.79381e-34	SSC4D
ENSG00000110697	-0.596825	6.12105e-49	1.11037e-47	PITPNM1
ENSG00000139531	0.820502	2.00698e-56	4.19238e-55	SUOX
ENSG00000105523	1.42846	5.34349e-22	4.9476e-21	FAM83E
ENSG00000113231	-0.746825	6.49666e-08	3.15951e-07	PDE8B
ENSG00000117394	1.11927	2.03884e-236	2.48871e-234	SLC2A1
ENSG00000168993	-1.13423	8.15187e-32	1.00931e-30	CPLX1
ENSG00000105419	-1.46223	2.9705e-93	1.04856e-91	MEIS3
ENSG00000159063	0.629656	2.27808e-79	6.72095e-78	ALG8
ENSG00000116176	0.796924	1.25641e-05	5.08882e-05	TPSG1
ENSG00000143147	2.68018	3.36837e-146	2.12055e-144	GPR161
ENSG00000173193	-0.723734	8.44787e-51	1.59018e-49	PARP14
ENSG00000187037	1.47807	5.40419e-06	2.26189e-05	GPR141
ENSG00000267100	-1.01672	2.57651e-36	3.5748e-35	ILF3-AS1
ENSG00000088298	0.666852	7.76903e-20	6.69527e-19	EDEM2
ENSG00000180730	-4.85593	0	0	SHISA2
ENSG00000167460	-0.884829	6.00727e-70	1.54685e-68	TPM4
ENSG00000244479	0.825518	5.21851e-11	3.06845e-10	OR2A1-AS1
ENSG00000138944	1.69195	4.43726e-06	1.8714e-05	KIAA1644
ENSG00000105186	0.628772	7.08698e-55	1.44546e-53	ANKRD27
ENSG00000117114	1.19895	2.94283e-227	3.30227e-225	ADGRL2
ENSG00000173852	-1.12839	1.37667e-47	2.42174e-46	DPY19L1
ENSG00000160211	1.0578	2.34944e-65	5.70519e-64	G6PD
ENSG00000144306	0.647307	9.60089e-30	1.12926e-28	SCRN3
ENSG00000204852	0.616817	4.47755e-60	9.9858e-59	TCTN1
ENSG00000173221	1.95142	1.90946e-186	1.62411e-184	GLRX
ENSG00000119782	-1.69731	1.29634e-22	1.2273e-21	FKBP1B
ENSG00000262904	-1.13352	5.37272e-06	2.24902e-05	TMPOP2
ENSG00000142871	0.871652	4.79128e-14	3.2623e-13	CYR61
ENSG00000126259	-1.25883	2.51954e-18	2.04563e-17	KIRREL2
ENSG00000104863	-0.630768	2.40536e-07	1.12333e-06	LIN7B
ENSG00000104823	1.24886	2.00104e-120	9.71098e-119	ECH1
ENSG00000008056	-2.60358	2.99861e-25	3.09351e-24	SYN1
ENSG00000259943	-1.01998	1.9683e-26	2.11449e-25	RP1-39G22.7
ENSG00000144406	-1.82783	5.55912e-80	1.65691e-78	UNC80
ENSG00000177519	-2.18741	1.46224e-13	9.74856e-13	RPRM
ENSG00000131044	-1.10245	1.58278e-06	6.95507e-06	TTLL9
ENSG00000144677	0.878668	1.59483e-70	4.15683e-69	CTDSPL
ENSG00000164850	0.904455	8.49711e-05	0.000317646	GPER1
ENSG00000008282	1.22599	1.13079e-159	7.82765e-158	SYPL1
ENSG00000168348	1.57222	2.88113e-06	1.23497e-05	INSM2
ENSG00000133454	3.63565	1.83297e-42	2.92225e-41	MYO18B
ENSG00000113387	0.591073	7.25436e-83	2.25463e-81	SUB1
ENSG00000104524	0.617114	2.90229e-33	3.72763e-32	PYCRL
ENSG00000110492	1.11992	3.22228e-58	6.98182e-57	MDK
ENSG00000244239	0.936416	3.07308e-08	1.52822e-07	AC007009.1
ENSG00000196834	2.0511	7.09261e-128	3.74924e-126	POTEI
ENSG00000226054	1.64171	2.4661e-07	1.15103e-06	MEMO1P1
ENSG00000105559	-4.68794	1.00556e-133	5.67175e-132	PLEKHA4
ENSG00000143869	1.83475	1.4655e-12	9.31586e-12	GDF7
ENSG00000104290	1.09884	3.14308e-64	7.49582e-63	FZD3
ENSG00000181191	-1.0932	1.65933e-59	3.66486e-58	PJA1
ENSG00000137449	-1.33393	5.71242e-119	2.71454e-117	CPEB2
ENSG00000176697	1.82928	9.74717e-13	6.24823e-12	BDNF
ENSG00000061337	-1.69541	1.03886e-13	6.97393e-13	LZTS1
ENSG00000133134	-0.688582	2.86719e-40	4.35402e-39	BEX2
ENSG00000206172	1.81487	4.69304e-06	1.97588e-05	HBA1
ENSG00000166598	0.822565	2.24231e-228	2.55201e-226	HSP90B1
ENSG00000103710	-3.2615	2.05772e-21	1.86531e-20	RASL12
ENSG00000135373	1.57138	6.82663e-241	8.66359e-239	EHF
ENSG00000185668	-1.0927	0.000210036	0.000752707	POU3F1
ENSG00000168758	-1.07813	7.57754e-118	3.55333e-116	SEMA4C
ENSG00000124302	-3.04645	1.07691e-51	2.06604e-50	CHST8
ENSG00000103534	0.772833	3.73859e-05	0.000144961	TMC5
ENSG00000103512	1.49671	0	0	NOMO1
ENSG00000040608	-1.0466	6.31568e-20	5.45601e-19	RTN4R
ENSG00000103510	0.843823	4.77437e-75	1.3312e-73	KAT8
ENSG00000103485	0.782672	1.29863e-40	1.97957e-39	QPRT
ENSG00000114279	-2.08823	2.95873e-137	1.72356e-135	FGF12
ENSG00000112559	1.49517	0.000137107	0.000500266	MDFI
ENSG00000125995	0.590202	2.221e-21	2.01047e-20	ROMO1
ENSG00000180066	1.60547	4.0827e-08	2.01323e-07	C10orf91
ENSG00000213853	0.816412	1.8809e-165	1.36402e-163	EMP2
ENSG00000179915	-4.28128	4.48141e-233	5.32788e-231	NRXN1
ENSG00000110723	-0.61191	1.95373e-18	1.59271e-17	EXPH5
ENSG00000103356	1.21536	2.82203e-208	2.77696e-206	EARS2
ENSG00000103319	0.710554	1.40504e-79	4.15677e-78	EEF2K
ENSG00000119715	1.28616	1.87352e-06	8.17309e-06	ESRRB
ENSG00000125999	1.0202	2.24137e-90	7.58533e-89	BPIFB1
ENSG00000103260	0.835066	1.43281e-39	2.14225e-38	METRN
ENSG00000103202	0.624232	6.68649e-27	7.27349e-26	NME4
ENSG00000206052	-3.41584	5.13868e-85	1.64176e-83	DOK6
ENSG00000144152	-1.94428	9.85626e-14	6.62769e-13	FBLN7
ENSG00000105655	-1.00282	4.44091e-108	1.85653e-106	ISYNA1
ENSG00000133216	-1.94744	2.3256e-52	4.52678e-51	EPHB2
ENSG00000103089	1.74331	1.81133e-26	1.94847e-25	FA2H
ENSG00000103056	-1.55324	6.61585e-36	9.06131e-35	SMPD3
ENSG00000200534	0.667171	0.000211347	0.000757168	SNORA33
ENSG00000216490	2.86825	0	0	IFI30
ENSG00000116661	-1.86637	1.0877e-121	5.37645e-120	FBXO2
ENSG00000100219	0.938647	1.05364e-288	1.72803e-286	XBP1
ENSG00000110665	2.30643	8.185e-09	4.23499e-08	C11orf21
ENSG00000102924	-4.25035	1.78566e-200	1.67962e-198	CBLN1
ENSG00000176641	0.974263	2.07535e-263	2.94986e-261	RNF152
ENSG00000101746	2.01863	1.14831e-19	9.81401e-19	NOL4
ENSG00000107159	2.307	2.84164e-12	1.77879e-11	CA9
ENSG00000138336	-0.637198	3.47696e-25	3.57891e-24	TET1
ENSG00000167971	-0.839508	9.69626e-17	7.3991e-16	CASKIN1
ENSG00000143387	-0.719879	0.000118339	0.000435362	CTSK
ENSG00000179588	-0.731898	8.65503e-08	4.18058e-07	ZFPM1
ENSG00000127418	-1.18456	8.21369e-59	1.79428e-57	FGFRL1
ENSG00000178623	0.700916	3.49366e-07	1.60972e-06	GPR35
ENSG00000146233	-1.1631	1.98512e-10	1.12784e-09	CYP39A1
ENSG00000271133	1.83193	6.76346e-08	3.28477e-07	CTA-293F17.1
ENSG00000148735	1.22315	1.42692e-08	7.25967e-08	PLEKHS1
ENSG00000137648	-1.17011	3.72965e-21	3.35616e-20	TMPRSS4
ENSG00000122852	1.45982	3.90607e-06	1.65391e-05	SFTPA1
ENSG00000167981	0.882199	7.63003e-21	6.799e-20	ZNF597
ENSG00000103549	0.739725	1.30829e-131	7.20145e-130	RNF40
ENSG00000106665	-1.33111	2.9794e-35	4.0069e-34	CLIP2
ENSG00000103423	1.11028	1.02382e-207	1.00131e-205	DNAJA3
ENSG00000155265	-4.16837	5.09512e-195	4.64237e-193	GOLGA7B
ENSG00000162627	-4.7428	2.85806e-44	4.71882e-43	SNX7
ENSG00000077279	-5.15647	3.0117e-161	2.12152e-159	DCX
ENSG00000176153	1.13591	2.62396e-07	1.2215e-06	GPX2
ENSG00000151692	-0.716489	1.04465e-13	7.00836e-13	RNF144A
ENSG00000102100	0.684742	7.38589e-32	9.16245e-31	SLC35A2
ENSG00000248771	2.8931	1.59113e-59	3.52152e-58	LINC01207
ENSG00000102032	0.806031	5.07577e-05	0.000194149	RENBP
ENSG00000260219	1.04878	1.3022e-10	7.47949e-10	RP11-347C12.10
ENSG00000180777	2.44572	4.31439e-276	6.60185e-274	ANKRD30B
ENSG00000106049	1.32947	7.02959e-138	4.11746e-136	HIBADH
ENSG00000135046	2.40971	8.52461e-25	8.67405e-24	ANXA1
ENSG00000127948	0.621653	1.82783e-51	3.49199e-50	POR
ENSG00000109956	2.72734	2.58792e-19	2.17801e-18	B3GAT1
ENSG00000101981	1.76105	6.82743e-06	2.83238e-05	F9
ENSG00000228705	1.71532	2.07162e-05	8.22908e-05	LINC00659
ENSG00000137812	-0.773639	3.069e-93	1.08094e-91	CASC5
ENSG00000112378	5.28045	0	0	PERP
ENSG00000101842	2.08766	6.15711e-15	4.36803e-14	VSIG1
ENSG00000178826	0.824423	4.23517e-09	2.22735e-08	TMEM139
ENSG00000137331	1.60069	8.82607e-111	3.84036e-109	IER3
ENSG00000089876	0.882766	1.54269e-27	1.71071e-26	DHX32
ENSG00000108932	0.706132	1.0035e-17	7.95755e-17	SLC16A6
ENSG00000103034	0.892244	2.04049e-08	1.02654e-07	NDRG4
ENSG00000143882	0.707514	5.42501e-10	3.00584e-09	ATP6V1C2
ENSG00000138759	0.958053	9.13493e-06	3.74448e-05	FRAS1
ENSG00000186648	-1.14482	1.11026e-38	1.63177e-37	LRRC16B
ENSG00000116014	-5.94895	5.6106e-152	3.6249e-150	KISS1R
ENSG00000170464	-0.734414	1.15821e-19	9.89069e-19	DNAJC18
ENSG00000160190	0.942117	1.35266e-100	5.24357e-99	SLC37A1
ENSG00000146701	0.849423	4.16239e-88	1.3852e-86	MDH2
ENSG00000101435	-1.56866	0.000103234	0.000382167	CST9L
ENSG00000133640	2.21856	2.73913e-11	1.63311e-10	LRRIQ1
ENSG00000177432	1.15612	1.49214e-14	1.04101e-13	NAP1L5
ENSG00000125864	1.53153	3.10864e-27	3.41172e-26	BFSP1
ENSG00000162512	-1.28172	2.09099e-42	3.33028e-41	SDC3
ENSG00000167183	0.724016	7.23196e-36	9.89244e-35	PRR15L
ENSG00000184845	-1.99399	4.68658e-07	2.14423e-06	DRD1
ENSG00000064195	-3.4128	7.63793e-23	7.28508e-22	DLX3
ENSG00000100522	0.607365	2.55248e-110	1.10461e-108	GNPNAT1
ENSG00000101180	-3.79579	3.02978e-93	1.06831e-91	HRH3
ENSG00000152778	1.04473	2.64335e-18	2.14235e-17	IFIT5
ENSG00000165887	-1.55612	5.85692e-05	0.00022267	ANKRD2
ENSG00000162878	-1.94816	0	0	PKDCC
ENSG00000050344	1.3386	5.19016e-57	1.09418e-55	NFE2L3
ENSG00000176681	-0.767887	1.0549e-14	7.41301e-14	LRRC37A
ENSG00000101098	-5.87105	1.21156e-102	4.7954e-101	RIMS4
ENSG00000124766	-1.53442	0	0	SOX4
ENSG00000142156	1.80099	4.45646e-19	3.71926e-18	COL6A1
ENSG00000007216	1.84214	2.61814e-06	1.12799e-05	SLC13A2
ENSG00000260614	-1.67295	3.50686e-05	0.000136356	RP11-491F9.1
ENSG00000101844	1.06664	2.04413e-54	4.11672e-53	ATG4A
ENSG00000104312	0.792133	2.66154e-20	2.32438e-19	RIPK2
ENSG00000161791	0.606664	3.97099e-21	3.56931e-20	FMNL3
ENSG00000102879	2.10744	1.34619e-59	2.98562e-58	CORO1A
ENSG00000171067	0.6343	5.18262e-25	5.31406e-24	C11orf24
ENSG00000242574	4.7868	2.59463e-131	1.41844e-129	HLA-DMB
ENSG00000081051	1.26994	4.78253e-09	2.50574e-08	AFP
ENSG00000152931	-2.24425	1.49436e-120	7.28522e-119	PART1
ENSG00000108679	0.801417	5.79091e-117	2.69185e-115	LGALS3BP
ENSG00000146278	-1.03523	6.33321e-111	2.75943e-109	PNRC1
ENSG00000265972	-8.62377	0	0	TXNIP
ENSG00000145819	3.83841	3.38566e-220	3.63345e-218	ARHGAP26
ENSG00000124466	0.790465	3.40104e-19	2.85182e-18	LYPD3
ENSG00000139055	1.6313	4.81467e-14	3.27682e-13	ERP27
ENSG00000152952	-5.26147	3.72146e-154	2.45394e-152	PLOD2
ENSG00000137948	1.62484	3.62119e-06	1.53756e-05	BRDT
ENSG00000100234	1.79181	0	0	TIMP3
ENSG00000164970	-0.706918	5.75519e-19	4.78442e-18	FAM219A
ENSG00000162817	2.79564	0	0	C1orf115
ENSG00000137193	-0.901441	1.92193e-13	1.27521e-12	PIM1
ENSG00000102781	-1.01131	5.93971e-48	1.05123e-46	KATNAL1
ENSG00000137727	-2.71583	1.68666e-14	1.1734e-13	ARHGAP20
ENSG00000163362	3.48882	5.53898e-277	8.55759e-275	C1orf106
ENSG00000086548	2.43532	4.70141e-35	6.30158e-34	CEACAM6
ENSG00000188672	1.03588	9.19269e-05	0.000342249	RHCE
ENSG00000101213	1.99544	2.49973e-110	1.08325e-108	PTK6
ENSG00000100417	0.853199	1.32891e-38	1.94953e-37	PMM1
ENSG00000167371	-1.34935	2.66808e-28	3.02152e-27	PRRT2
ENSG00000196227	-0.982772	2.03121e-124	1.0377e-122	FAM217B
ENSG00000178184	-0.998936	1.68281e-36	2.35321e-35	PARD6G
ENSG00000099282	1.31565	7.21862e-234	8.67889e-232	TSPAN15
ENSG00000204442	1.60489	3.9184e-52	7.57187e-51	FAM155A
ENSG00000241014	-0.962906	1.15924e-05	4.71256e-05	RP11-244H3.1
ENSG00000115525	1.19302	4.83576e-105	1.95763e-103	ST3GAL5
ENSG00000179082	-1.22738	9.95288e-41	1.51935e-39	C9orf106
ENSG00000079462	-0.61641	5.23188e-33	6.67148e-32	PAFAH1B3
ENSG00000101977	-2.17302	5.94917e-08	2.9043e-07	MCF2
ENSG00000115507	1.09036	1.09933e-10	6.345e-10	OTX1
ENSG00000100304	0.652559	3.27666e-35	4.40298e-34	TTLL12
ENSG00000004799	0.901063	4.45831e-47	7.7574e-46	PDK4
ENSG00000240694	3.36181	1.07197e-136	6.23323e-135	PNMA2
ENSG00000169884	0.74138	6.55791e-31	7.95934e-30	WNT10B
ENSG00000102003	-2.99428	0	0	SYP
ENSG00000108100	0.693911	1.72492e-79	5.0937e-78	CCNY
ENSG00000181381	0.770711	1.65237e-43	2.68382e-42	DDX60L
ENSG00000115963	-1.61388	1.75696e-226	1.96466e-224	RND3
ENSG00000109756	1.71266	2.41658e-75	6.75564e-74	RAPGEF2
ENSG00000162433	-1.62278	5.38907e-193	4.84123e-191	AK4
ENSG00000171450	-3.42386	6.37565e-21	5.70349e-20	CDK5R2
ENSG00000171385	-1.99786	1.8356e-27	2.03059e-26	KCND3
ENSG00000112562	1.7466	1.57543e-66	3.88764e-65	SMOC2
ENSG00000125508	0.731008	1.28625e-07	6.13966e-07	SRMS
ENSG00000106688	-2.23127	1.55099e-35	2.10268e-34	SLC1A1
ENSG00000184058	-2.08746	7.04256e-28	7.8641e-27	TBX1
ENSG00000154978	-1.47133	6.11874e-110	2.61959e-108	VOPP1
ENSG00000010270	0.925937	6.64344e-85	2.11617e-83	STARD3NL
ENSG00000101871	-1.50742	7.48861e-18	5.96645e-17	MID1
ENSG00000115738	-0.967863	2.5928e-142	1.57643e-140	ID2
ENSG00000100095	0.979344	5.68706e-05	0.000216598	SEZ6L
ENSG00000178171	-1.04466	3.66552e-11	2.17409e-10	AMER3
ENSG00000123505	0.675069	1.42863e-57	3.05408e-56	AMD1
ENSG00000103550	0.816102	6.27489e-77	1.79818e-75	KNOP1
ENSG00000100077	-0.765261	1.11868e-51	2.14488e-50	ADRBK2
ENSG00000214160	1.01602	1.0506e-35	1.43097e-34	ALG3
ENSG00000151136	-1.51229	1.93572e-12	1.22465e-11	BTBD11
ENSG00000184575	0.944796	5.15176e-154	3.39009e-152	XPOT
ENSG00000135249	0.586588	7.77706e-26	8.17077e-25	RINT1
ENSG00000005102	4.49913	2.0725e-58	4.50275e-57	MEOX1
ENSG00000078053	3.51331	5.74423e-27	6.26129e-26	AMPH
ENSG00000099953	-0.723482	3.42536e-07	1.57962e-06	MMP11
ENSG00000133874	0.836315	0.000221451	0.000790956	RNF122
ENSG00000177409	1.8962	1.86355e-08	9.39736e-08	SAMD9L
ENSG00000170855	0.659138	1.57067e-25	1.63727e-24	TRIAP1
ENSG00000183010	0.680611	6.61647e-80	1.96838e-78	PYCR1
ENSG00000172878	0.645194	1.38635e-12	8.82498e-12	METAP1D
ENSG00000099904	0.612102	4.54557e-19	3.79165e-18	ZDHHC8
ENSG00000074590	-1.32189	2.05573e-45	3.46753e-44	NUAK1
ENSG00000105810	1.56515	1.64084e-221	1.76686e-219	CDK6
ENSG00000127831	1.69301	4.2802e-36	5.8926e-35	VIL1
ENSG00000099849	0.61468	2.92078e-24	2.91267e-23	RASSF7
ENSG00000175416	0.62026	2.78967e-40	4.23831e-39	CLTB
ENSG00000099622	-0.707647	7.71402e-89	2.57787e-87	CIRBP
ENSG00000099377	2.67242	0	0	HSD3B7
ENSG00000181418	0.899724	1.55909e-08	7.90944e-08	DDN
ENSG00000115295	-4.60262	1.09193e-204	1.04868e-202	CLIP4
ENSG00000181625	1.1832	5.94735e-25	6.08064e-24	SLX1B
ENSG00000164733	1.11823	1.66348e-178	1.34683e-176	CTSB
ENSG00000140955	-1.85703	8.66015e-07	3.88771e-06	ADAD2
ENSG00000165816	3.00883	4.37332e-26	4.63737e-25	VWA2
ENSG00000254772	0.697602	3.91521e-106	1.60529e-104	EEF1G
ENSG00000105854	2.22014	0	0	PON2
ENSG00000144063	-1.79444	7.59072e-12	4.63811e-11	MALL
ENSG00000116649	0.862254	1.84239e-24	1.85171e-23	SRM
ENSG00000048052	0.783653	0.000152683	0.000555323	HDAC9
ENSG00000185164	1.39385	3.00277e-247	3.96824e-245	NOMO2
ENSG00000095713	-3.40154	3.14251e-24	3.12794e-23	CRTAC1
ENSG00000197249	3.83455	2.12323e-263	3.00456e-261	SERPINA1
ENSG00000095637	-1.10283	1.94196e-10	1.10391e-09	SORBS1
ENSG00000145911	-1.43002	7.85391e-94	2.79706e-92	N4BP3
ENSG00000099194	1.27612	0	0	SCD
ENSG00000124788	1.39138	6.51357e-281	1.02113e-278	ATXN1
ENSG00000114654	2.34929	1.48348e-29	1.73403e-28	EFCC1
ENSG00000095539	1.3059	8.05063e-37	1.13772e-35	SEMA4G
ENSG00000103227	0.823817	3.07817e-16	2.30708e-15	LMF1
ENSG00000009694	6.45434	3.0823e-177	2.46438e-175	TENM1
ENSG00000148158	-0.671839	7.06443e-38	1.02045e-36	SNX30
ENSG00000136235	1.34591	5.46856e-09	2.85721e-08	GPNMB
ENSG00000095015	-0.594468	3.48047e-74	9.58734e-73	MAP3K1
ENSG00000111321	0.82012	5.70172e-99	2.17079e-97	LTBR
ENSG00000224087	2.93891	1.31536e-19	1.11909e-18	AC018804.3
ENSG00000197530	-0.63054	2.63959e-22	2.47194e-21	MIB2
ENSG00000013503	0.843201	1.31982e-37	1.89704e-36	POLR3B
ENSG00000120262	0.9681	6.43256e-67	1.59473e-65	CCDC170
ENSG00000168453	-0.78207	2.75252e-25	2.84513e-24	HR
ENSG00000006283	-0.926231	3.75264e-14	2.57098e-13	CACNA1G
ENSG00000135549	1.1741	2.44786e-30	2.93312e-29	PKIB
ENSG00000071462	0.939715	4.11639e-101	1.60937e-99	WBSCR22
ENSG00000227051	-1.13667	6.29885e-183	5.25963e-181	C14orf132
ENSG00000181215	1.52146	1.27091e-08	6.48554e-08	C4orf50
ENSG00000007237	2.94184	2.23352e-82	6.88154e-81	GAS7
ENSG00000154734	-2.53395	3.66517e-24	3.64024e-23	ADAMTS1
ENSG00000092421	2.83085	5.52782e-116	2.5584e-114	SEMA6A
ENSG00000105443	-0.923229	3.39686e-99	1.29791e-97	CYTH2
ENSG00000109321	-2.06628	2.51696e-93	8.89445e-92	AREG
ENSG00000114841	0.828349	1.66675e-16	1.26254e-15	DNAH1
ENSG00000153930	2.7102	1.79394e-21	1.63081e-20	ANKFN1
ENSG00000092068	0.837336	1.10186e-34	1.46278e-33	SLC7A8
ENSG00000138411	-1.71539	8.07525e-120	3.88937e-118	HECW2
ENSG00000100505	-1.21659	6.65267e-27	7.24163e-26	TRIM9
ENSG00000132932	-2.61816	4.54794e-12	2.81167e-11	ATP8A2
ENSG00000091527	-1.65432	0	0	CDV3
ENSG00000137225	0.789381	3.95435e-08	1.95311e-07	CAPN11
ENSG00000091490	1.71946	3.38295e-37	4.81487e-36	SEL1L3
ENSG00000099998	-2.68011	8.29471e-83	2.57297e-81	GGT5
ENSG00000176840	-5.64771	1.84545e-146	1.1687e-144	MIR7-3HG
ENSG00000138399	0.599651	1.31977e-22	1.24837e-21	FASTKD1
ENSG00000136247	0.79521	1.76196e-77	5.0811e-76	ZDHHC4
ENSG00000249839	-1.17818	1.54257e-14	1.07526e-13	AC011330.5
ENSG00000090975	1.69713	6.25438e-15	4.43506e-14	PITPNM2
ENSG00000117500	0.585684	4.02398e-43	6.49298e-42	TMED5
ENSG00000111348	5.50062	2.25942e-87	7.44933e-86	ARHGDIB
ENSG00000211584	0.67564	8.25854e-31	9.99305e-30	SLC48A1
ENSG00000143167	2.23771	7.36705e-13	4.74724e-12	GPA33
ENSG00000131019	1.45824	0.000163407	0.000592642	ULBP3
ENSG00000134215	-0.707218	1.82362e-68	4.61767e-67	VAV3
ENSG00000188263	1.97453	6.95602e-14	4.7002e-13	IL17REL
ENSG00000101203	2.13824	6.34282e-11	3.7118e-10	COL20A1
ENSG00000135537	0.722196	5.48302e-25	5.61487e-24	LACE1
ENSG00000096006	3.83298	3.22729e-192	2.88302e-190	CRISP3
ENSG00000090266	0.894152	1.01074e-122	5.08248e-121	NDUFB2
ENSG00000176533	-0.667573	3.49295e-06	1.48548e-05	GNG7
ENSG00000090238	0.785376	4.34244e-27	4.74626e-26	YPEL3
ENSG00000130600	1.32366	2.74842e-06	1.18078e-05	H19
ENSG00000230487	1.0405	1.13298e-26	1.22495e-25	PSMG3-AS1
ENSG00000146094	-0.743627	0.000160528	0.000582662	DOK3
ENSG00000171848	-0.628012	1.80137e-50	3.36702e-49	RRM2
ENSG00000128487	1.37871	6.16119e-133	3.46294e-131	SPECC1
ENSG00000099326	-0.659287	9.45186e-24	9.26671e-23	MZF1
ENSG00000185022	0.912214	4.4059e-31	5.36576e-30	MAFF
ENSG00000154229	1.67649	4.64928e-47	8.0809e-46	PRKCA
ENSG00000132613	-1.01496	5.24013e-56	1.08892e-54	MTSS1L
ENSG00000105518	0.963861	2.84213e-101	1.1139e-99	TMEM205
ENSG00000171132	-2.51771	6.254e-196	5.73092e-194	PRKCE
ENSG00000111652	0.645881	2.90152e-33	3.72763e-32	COPS7A
ENSG00000138606	-1.22717	3.82019e-09	2.01241e-08	SHF
ENSG00000134901	2.72154	2.93702e-51	5.591e-50	KDELC1
ENSG00000114796	-1.22986	1.62114e-56	3.39973e-55	KLHL24
ENSG00000184489	-0.884298	7.24815e-15	5.12272e-14	PTP4A3
ENSG00000189431	-3.44857	4.31064e-18	3.46814e-17	RASSF10
ENSG00000089157	0.681368	5.27484e-109	2.2403e-107	RPLP0
ENSG00000089127	1.79988	5.70029e-15	4.04844e-14	OAS1
ENSG00000075420	-0.668348	1.22004e-32	1.54283e-31	FNDC3B
ENSG00000103415	0.683282	1.80314e-44	2.98479e-43	HMOX2
ENSG00000131389	-1.94571	3.09217e-108	1.29608e-106	SLC6A6
ENSG00000196411	1.18133	8.27856e-158	5.65719e-156	EPHB4
ENSG00000074527	4.0068	0	0	NTN4
ENSG00000107954	-1.82248	2.95578e-73	8.01771e-72	NEURL1
ENSG00000135547	-1.71692	2.13628e-93	7.55758e-92	HEY2
ENSG00000267868	-2.82976	7.93286e-15	5.59429e-14	RP11-120K24.3
ENSG00000118160	-3.50992	1.45113e-119	6.93701e-118	SLC8A2
ENSG00000004142	0.755434	7.27193e-75	2.02405e-73	POLDIP2
ENSG00000275714	0.730716	1.11949e-19	9.57281e-19	HIST1H3A
ENSG00000135596	-1.41157	6.01815e-65	1.45587e-63	MICAL1
ENSG00000088836	1.23013	2.77529e-21	2.50583e-20	SLC4A11
ENSG00000057294	1.2799	1.59645e-65	3.87965e-64	PKP2
ENSG00000008300	-1.16777	7.67587e-179	6.23051e-177	CELSR3
ENSG00000198848	3.22608	3.16253e-29	3.67251e-28	CES1
ENSG00000088726	1.74952	3.05771e-32	3.83335e-31	TMEM40
ENSG00000101187	-1.3582	3.68938e-08	1.82619e-07	SLCO4A1
ENSG00000074416	1.20213	1.21664e-229	1.40467e-227	MGLL
ENSG00000013441	-0.64255	9.14837e-42	1.43208e-40	CLK1
ENSG00000102362	1.23012	1.23279e-44	2.04703e-43	SYTL4
ENSG00000242759	-0.855305	6.53803e-06	2.71726e-05	LINC00882
ENSG00000152256	0.819893	1.55695e-30	1.86981e-29	PDK1
ENSG00000087494	1.33179	3.92853e-10	2.19226e-09	PTHLH
ENSG00000087460	0.866085	4.69664e-143	2.88298e-141	GNAS
ENSG00000133519	2.07668	3.47663e-278	5.39738e-276	ZDHHC8P1
ENSG00000162976	1.05743	2.204e-26	2.36293e-25	PQLC3
ENSG00000024422	1.01872	1.17363e-23	1.14573e-22	EHD2
ENSG00000170379	-1.29286	3.86055e-92	1.33619e-90	TCAF2
ENSG00000059122	0.688567	9.73061e-32	1.20152e-30	FLYWCH1
ENSG00000116731	0.687741	5.94876e-13	3.8496e-12	PRDM2
ENSG00000164182	0.741877	2.72232e-21	2.4587e-20	NDUFAF2
ENSG00000106400	0.587823	2.22693e-37	3.18513e-36	ZNHIT1
ENSG00000137628	0.749509	7.88263e-30	9.28867e-29	DDX60
ENSG00000176720	-1.04902	4.70373e-81	1.42183e-79	BOK
ENSG00000120833	0.925651	2.38872e-75	6.6836e-74	SOCS2
ENSG00000100167	-2.61518	5.80623e-184	4.89945e-182	2017-09-03
ENSG00000095380	1.06081	7.10567e-126	3.69506e-124	NANS
ENSG00000198720	-1.64635	6.96892e-56	1.44441e-54	ANKRD13B
ENSG00000167619	-3.04844	1.23579e-64	2.9738e-63	TMEM145
ENSG00000177181	-1.24992	1.08096e-92	3.77405e-91	RIMKLA
ENSG00000091483	0.625322	6.44605e-84	2.03305e-82	FH
ENSG00000056487	-6.36754	8.20497e-162	5.79256e-160	PHF21B
ENSG00000158321	3.60032	1.15863e-84	3.676e-83	AUTS2
ENSG00000078596	4.45352	2.09453e-42	3.33425e-41	ITM2A
ENSG00000187838	-1.33355	1.67934e-13	1.1168e-12	TMEM256-PLSCR3
ENSG00000185043	0.774371	5.84217e-40	8.78826e-39	CIB1
ENSG00000115526	-1.09018	7.32291e-31	8.87435e-30	CHST10
ENSG00000117407	-1.37549	7.62117e-22	7.01389e-21	ARTN
ENSG00000144445	-0.628981	4.80831e-30	5.70837e-29	KANSL1L
ENSG00000057252	0.950618	1.01734e-119	4.88523e-118	SOAT1
ENSG00000174827	-0.793331	4.86258e-12	3.00445e-11	PDZK1
ENSG00000101096	-1.75737	5.18646e-06	2.17561e-05	NFATC2
ENSG00000102038	1.14869	0.00012121	0.000445359	SMARCA1
ENSG00000082438	1.57205	2.27235e-204	2.16931e-202	COBLL1
ENSG00000145284	-1.1625	1.39697e-167	1.04629e-165	SCD5
ENSG00000111261	0.845431	2.03924e-36	2.83676e-35	MANSC1
ENSG00000166140	0.696364	8.09526e-45	1.34982e-43	ZFYVE19
ENSG00000057019	1.52561	3.15242e-187	2.69566e-185	DCBLD2
ENSG00000035681	1.90279	5.7616e-145	3.59185e-143	NSMAF
ENSG00000131080	-2.61965	8.73812e-16	6.4331e-15	EDA2R
ENSG00000136274	-1.65204	3.35945e-06	1.43175e-05	NACAD
ENSG00000159921	0.861956	1.07971e-72	2.89441e-71	GNE
ENSG00000165061	-1.47108	4.77544e-38	6.92623e-37	ZMAT4
ENSG00000055147	-0.657046	3.68965e-21	3.3211e-20	FAM114A2
ENSG00000088833	0.833541	8.59962e-67	2.12702e-65	NSFL1C
ENSG00000180884	-0.606921	2.619e-10	1.4767e-09	ZNF792
ENSG00000174721	-1.14635	1.58536e-13	1.05496e-12	FGFBP3
ENSG00000128564	-3.03904	4.81957e-42	7.60407e-41	VGF
ENSG00000137269	-0.766286	7.19485e-68	1.80753e-66	LRRC1
ENSG00000063660	-1.03372	1.33673e-84	4.23267e-83	GPC1
ENSG00000104219	1.52072	0.000147587	0.000537399	ZDHHC2
ENSG00000100422	-2.64668	3.34926e-120	1.61802e-118	CERK
ENSG00000018236	1.22093	1.51967e-11	9.16474e-11	CNTN1
ENSG00000258947	-4.11984	0	0	TUBB3
ENSG00000134240	3.50762	0	0	HMGCS2
ENSG00000179546	3.19145	1.41614e-169	1.0809e-167	HTR1D
ENSG00000100596	0.586966	8.25286e-96	3.02331e-94	SPTLC2
ENSG00000173821	0.603207	5.92661e-48	1.0495e-46	RNF213
ENSG00000162373	-2.40615	3.27607e-17	2.55479e-16	BEND5
ENSG00000163879	-0.63136	5.17457e-37	7.34197e-36	DNALI1
ENSG00000156925	-1.42353	2.22544e-10	1.26012e-09	ZIC3
ENSG00000196586	1.35492	1.53899e-126	8.04221e-125	MYO6
ENSG00000069764	1.35986	7.29879e-09	3.78441e-08	PLA2G10
ENSG00000054277	2.42752	0	0	OPN3
ENSG00000258499	-3.27409	5.12484e-23	4.90858e-22	RP11-862G15.2
ENSG00000071073	1.66635	0	0	MGAT4A
ENSG00000133321	-0.868794	5.47053e-20	4.73999e-19	RARRES3
ENSG00000255362	-0.938067	6.83113e-11	3.99171e-10	RP11-619A14.3
ENSG00000171798	-1.52621	7.3603e-26	7.73545e-25	KNDC1
ENSG00000141577	-1.04533	1.97682e-57	4.20911e-56	CEP131
ENSG00000147642	4.72783	3.72014e-98	1.40134e-96	SYBU
ENSG00000107819	-1.0379	7.04276e-73	1.89751e-71	SFXN3
ENSG00000179918	1.19412	1.20632e-49	2.21466e-48	SEPHS2
ENSG00000167100	-0.994073	7.75889e-10	4.25621e-09	SAMD14
ENSG00000120049	0.842057	3.17562e-07	1.46783e-06	KCNIP2
ENSG00000067715	2.56775	0	0	SYT1
ENSG00000239521	-0.929782	4.54362e-40	6.85422e-39	GATS
ENSG00000099284	-4.16274	2.3404e-307	4.18147e-305	H2AFY2
ENSG00000180592	0.998209	1.121e-11	6.80668e-11	SKIDA1
ENSG00000037897	0.831855	4.57598e-23	4.39077e-22	METTL1
ENSG00000128228	0.995825	2.80511e-58	6.08204e-57	SDF2L1
ENSG00000095627	1.41364	7.00329e-06	2.90119e-05	TDRD1
ENSG00000047578	0.602719	6.63714e-39	9.78619e-38	KIAA0556
ENSG00000105929	6.32689	2.5687e-152	1.66632e-150	ATP6V0A4
ENSG00000090932	-1.27142	3.18587e-18	2.57486e-17	DLL3
ENSG00000168675	-3.15435	7.51976e-260	1.05017e-257	LDLRAD4
ENSG00000077327	-4.71004	1.26377e-41	1.97058e-40	SPAG6
ENSG00000204618	0.983389	1.94817e-08	9.81481e-08	RNF39
ENSG00000166840	1.14804	6.22582e-58	1.3417e-56	GLYATL1
ENSG00000147604	0.589187	8.71336e-124	4.42321e-122	RPL7
ENSG00000147573	1.63028	4.55333e-05	0.00017494	TRIM55
ENSG00000115221	3.6478	1.03135e-62	2.40231e-61	ITGB6
ENSG00000046604	-2.27135	1.72465e-176	1.37204e-174	DSG2
ENSG00000267022	0.785526	1.32594e-05	5.36295e-05	AC084219.2
ENSG00000173812	-0.596515	1.48107e-05	5.955e-05	EIF1
ENSG00000277301	-1.14496	1.41433e-06	6.23627e-06	RP5-1184F4.7
ENSG00000103148	0.809306	5.39774e-26	5.70473e-25	NPRL3
ENSG00000164647	3.53995	2.00428e-61	4.54924e-60	STEAP1
ENSG00000169908	-1.9691	9.27461e-263	1.30666e-260	TM4SF1
ENSG00000020181	0.616468	2.16384e-16	1.63135e-15	ADGRA2
ENSG00000113369	-0.854453	1.16258e-35	1.58215e-34	ARRDC3
ENSG00000130943	-1.02053	2.09629e-07	9.83589e-07	PKDREJ
ENSG00000041982	-3.47776	0	0	TNC
ENSG00000136153	1.40863	2.99673e-115	1.37699e-113	LMO7
ENSG00000183569	1.17879	4.2481e-59	9.33734e-58	SERHL2
ENSG00000006432	0.728601	5.44695e-74	1.49655e-72	MAP3K9
ENSG00000088179	-0.614486	1.0186e-45	1.72816e-44	PTPN4
ENSG00000156687	-5.81818	1.69728e-130	9.15357e-129	UNC5D
ENSG00000115705	1.56271	2.10056e-06	9.12745e-06	TPO
ENSG00000169435	1.49495	3.45644e-73	9.35989e-72	RASSF6
ENSG00000076641	-1.95645	1.00863e-183	8.48871e-182	PAG1
ENSG00000004838	-1.02819	1.34758e-12	8.58502e-12	ZMYND10
ENSG00000148700	-0.607293	4.95536e-31	6.03034e-30	ADD3
ENSG00000107165	2.09474	2.01452e-07	9.46195e-07	TYRP1
ENSG00000095739	-0.980136	2.07506e-108	8.74342e-107	BAMBI
ENSG00000108773	0.604433	3.33208e-43	5.38742e-42	KAT2A
ENSG00000036672	-2.04652	1.34144e-07	6.39258e-07	USP2
ENSG00000123364	1.85498	2.99664e-41	4.63421e-40	HOXC13
ENSG00000149380	1.01695	3.89419e-09	2.05106e-08	P4HA3
ENSG00000114251	-1.62529	1.1033e-05	4.49142e-05	WNT5A
ENSG00000139370	0.800214	1.40457e-34	1.85925e-33	SLC15A4
ENSG00000134824	-4.30556	0	0	FADS2
ENSG00000205090	-1.27313	0.000217343	0.000777238	TMEM240
ENSG00000019144	-1.94812	3.05141e-170	2.33462e-168	PHLDB1
ENSG00000166949	-1.07482	1.63647e-64	3.92617e-63	SMAD3
ENSG00000196683	0.662843	2.87912e-56	6.00241e-55	TOMM7
ENSG00000130066	1.56641	0	0	SAT1
ENSG00000013392	0.831444	4.71938e-20	4.09692e-19	RWDD2A
ENSG00000106565	-1.89151	6.08255e-210	6.13647e-208	TMEM176B
ENSG00000166405	-1.10125	0.000164472	0.000596301	RIC3
ENSG00000004779	0.87986	6.36047e-81	1.91719e-79	NDUFAB1
ENSG00000134138	2.65079	9.51495e-78	2.75632e-76	MEIS2
ENSG00000038002	1.21221	7.34001e-32	9.11261e-31	AGA
ENSG00000082458	1.05396	2.37542e-306	4.19715e-304	DLG3
ENSG00000147257	1.20289	2.26146e-170	1.73438e-168	GPC3
ENSG00000166272	0.748676	5.73297e-47	9.93745e-46	WBP1L
ENSG00000148516	-1.50146	8.70087e-11	5.0538e-10	ZEB1
ENSG00000141540	3.18311	5.32661e-92	1.83964e-90	TTYH2
ENSG00000029534	-1.43033	4.65212e-135	2.67108e-133	ANK1
ENSG00000261068	1.45437	3.83923e-11	2.27375e-10	RP11-7K24.3
ENSG00000029153	5.49267	0	0	ARNTL2
ENSG00000168615	0.634937	2.60867e-122	1.2995e-120	ADAM9
ENSG00000076344	-2.48168	1.13614e-73	3.09497e-72	RGS11
ENSG00000074621	0.600748	3.46086e-19	2.90122e-18	SLC24A1
ENSG00000184005	-1.36475	4.29358e-10	2.3918e-09	ST6GALNAC3
ENSG00000006194	0.765695	3.98499e-80	1.18995e-78	ZNF263
ENSG00000059377	2.79555	2.62874e-214	2.71193e-212	TBXAS1
ENSG00000137693	-0.763984	2.36056e-38	3.44245e-37	YAP1
ENSG00000105388	2.82493	1.61559e-76	4.59681e-75	CEACAM5
ENSG00000058063	2.00582	3.29964e-31	4.02617e-30	ATP11B
ENSG00000106105	0.813054	1.01902e-73	2.78303e-72	GARS
ENSG00000108309	-3.13441	1.02775e-265	1.47392e-263	RUNDC3A
ENSG00000081059	-1.14287	3.71387e-13	2.43039e-12	TCF7
ENSG00000101298	4.53979	1.00849e-48	1.81704e-47	SNPH
ENSG00000124224	2.42551	5.757e-36	7.89176e-35	PPP4R1L
ENSG00000026508	-5.01233	6.41071e-95	2.32714e-93	CD44
ENSG00000026297	1.68884	2.11837e-177	1.69794e-175	RNASET2
ENSG00000110080	0.635311	2.10444e-23	2.03391e-22	ST3GAL4
ENSG00000153563	1.43115	6.09275e-13	3.94198e-12	CD8A
ENSG00000106077	0.786227	1.61087e-44	2.67068e-43	ABHD11
ENSG00000120306	1.64268	4.25372e-86	1.3811e-84	CYSTM1
ENSG00000234076	-1.69431	6.86338e-06	2.84618e-05	TPRG1-AS1
ENSG00000184903	0.784001	6.82952e-15	4.8354e-14	IMMP2L
ENSG00000068079	0.630491	2.5263e-12	1.58793e-11	IFI35
ENSG00000184368	-1.37064	4.00714e-19	3.34951e-18	MAP7D2
ENSG00000262877	-0.645743	1.59673e-14	1.11204e-13	RP11-1055B8.4
ENSG00000087074	-1.02814	9.54495e-29	1.09608e-27	PPP1R15A
ENSG00000103528	2.09962	1.70438e-157	1.15974e-155	SYT17
ENSG00000025039	3.9831	1.39249e-221	1.5045e-219	RRAGD
ENSG00000142892	0.690586	1.29464e-52	2.53236e-51	PIGK
ENSG00000081760	0.872731	1.42945e-120	6.97945e-119	AACS
[truncated: 2,417 more rows]

## Sheet: MM134 LTED-E DE genes
	log2FoldChange	p-value	adjusted p-value	gene_symbol
ENSG00000282164	-1.25685	1.67305e-15	1.17751e-14	PEG13
ENSG00000282012	1.37884	0.000258213	0.000908363	LL22NC03-N95F10.1
ENSG00000281406	-2.82464	6.00376e-13	3.79684e-12	BLACAT1
ENSG00000281332	-0.785161	6.86546e-05	0.000257916	LINC00997
ENSG00000280987	-0.880612	1.09329e-21	9.52189e-21	MATR3
ENSG00000280721	-1.63389	1.25122e-05	5.04542e-05	AC133644.2
ENSG00000280389	1.42863	3.90548e-11	2.26229e-10	RP11-512M8.11
ENSG00000280339	-1.04189	1.74978e-06	7.58672e-06	RP11-736K20.4
ENSG00000280325	-0.814386	1.82581e-05	7.24368e-05	AC074183.3
ENSG00000280321	-1.48274	4.49377e-05	0.000171949	RP11-1110F20.1
ENSG00000280237	-1.44131	3.63959e-12	2.22285e-11	MIR4697HG
ENSG00000280217	1.90047	3.43171e-21	2.94156e-20	RP11-638F5.2
ENSG00000280202	1.01988	9.83952e-05	0.000363958	RP5-1180D12.1
ENSG00000280073	-1.98459	1.33776e-14	9.10859e-14	CTD-2525P14.5
ENSG00000280055	-2.6738	3.0706e-11	1.79002e-10	TMEM75
ENSG00000280042	1.30315	1.65655e-05	6.60162e-05	RP11-71H17.8
ENSG00000279805	-1.49419	0.000192741	0.000688876	CTA-212A2.1
ENSG00000279801	0.954553	0.000118115	0.000432945	RP11-75C10.6
ENSG00000281881	2.06861	1.89154e-22	1.68318e-21	SPRY4-IT1
ENSG00000279769	-1.22866	0.000170869	0.000614478	CH507-42P11.3
ENSG00000279726	-1.67932	3.21932e-05	0.000124796	AC005609.16
ENSG00000279713	-1.65708	4.29115e-05	0.000164551	CTD-3035K23.3
ENSG00000279708	-1.58541	2.78295e-05	0.000108525	CTD-2335A18.2
ENSG00000279605	0.816776	4.86909e-09	2.5238e-08	RP11-661A12.8
ENSG00000279377	0.928705	5.117e-13	3.25212e-12	AC003973.3
ENSG00000279303	-1.60533	5.68502e-19	4.52046e-18	CH507-236L23.3
ENSG00000279186	-1.60533	5.68502e-19	4.52046e-18	CH507-39O4.3
ENSG00000279117	-1.57563	0	0	CTD-2562J17.6
ENSG00000278995	1.60976	2.66059e-05	0.000103969	Z69720.3
ENSG00000278971	2.19261	8.77052e-11	4.99715e-10	RP11-644A7.2
ENSG00000278962	-1.76257	1.14424e-05	4.63099e-05	RP11-399B17.1
ENSG00000278948	-1.85196	5.50358e-25	5.34173e-24	RP5-1039K5.12
ENSG00000278912	-1.83772	2.09221e-06	9.01277e-06	CTD-2196E14.8
ENSG00000278882	1.06903	1.87459e-08	9.31642e-08	AC253572.1
ENSG00000278817	0.880566	1.91187e-25	1.88134e-24	AC007325.4
ENSG00000278743	1.41202	2.03407e-09	1.07523e-08	RP11-707G18.1
ENSG00000278621	-1.61043	1.85979e-06	8.04733e-06	CTD-2033D15.3
ENSG00000278619	0.659477	2.67339e-06	1.1424e-05	MRM1
ENSG00000278540	0.775145	2.60893e-144	1.12599e-142	ACACA
ENSG00000278385	-1.02669	2.21539e-12	1.3675e-11	RP11-89H19.2
ENSG00000278200	-2.656	1.39843e-13	9.10674e-13	RP13-766D20.4
ENSG00000277938	0.637905	2.08814e-05	8.24354e-05	RP5-965G21.3
ENSG00000277877	1.17039	2.14942e-07	9.92789e-07	RP11-11N7.5
ENSG00000277701	-0.783415	1.35264e-07	6.32902e-07	RP11-734K23.9
ENSG00000277632	-1.6463	7.97411e-10	4.30923e-09	CCL3
ENSG00000280347	0.773522	1.50811e-05	6.03415e-05	AC000123.2
ENSG00000279390	-0.862825	3.49817e-07	1.59253e-06	AF127577.13
ENSG00000277399	1.07395	5.47159e-05	0.00020733	GPR179
ENSG00000277200	-2.10197	7.25196e-30	7.91282e-29	RP11-74E22.8
ENSG00000277053	-0.950062	3.74851e-63	7.24794e-62	GTF2IP1
ENSG00000277010	-1.33722	5.60196e-06	2.3255e-05	RP11-616M22.12
ENSG00000276649	1.90881	1.43522e-06	6.26791e-06	RP5-858L17.1
ENSG00000276345	0.856101	8.48668e-60	1.57068e-58	AC004556.1
ENSG00000279174	3.22326	6.68322e-22	5.85257e-21	RP11-1099M24.9
ENSG00000276116	0.829567	8.10473e-09	4.13987e-08	FUT8-AS1
ENSG00000276107	-2.38593	3.40683e-15	2.36393e-14	CTD-2033D15.2
ENSG00000276045	0.641696	5.05086e-20	4.15035e-19	ORAI1
ENSG00000275993	-1.88523	1.41162e-56	2.4887e-55	CH507-42P11.8
ENSG00000275944	1.93081	1.60464e-06	6.98016e-06	RP11-104J23.1
ENSG00000279672	0.604198	1.57752e-05	6.30163e-05	CMB9-55F22.1
ENSG00000275395	4.48218	1.25305e-244	1.06579e-242	FCGBP
ENSG00000275223	-0.724124	2.90249e-05	0.000113008	RP1-63M2.7
ENSG00000274995	1.76638	2.27487e-06	9.76939e-06	RP11-321F6.2
ENSG00000274897	1.09918	3.3906e-16	2.45828e-15	PANO1
ENSG00000274767	-1.4376	1.56726e-52	2.60512e-51	AC131056.3
ENSG00000274340	2.29143	3.404e-46	5.12057e-45	RP11-435J9.2
ENSG00000274269	2.37967	5.49435e-10	2.99752e-09	RP4-545L17.12
ENSG00000274180	-0.91702	9.60112e-12	5.7361e-11	NATD1
ENSG00000277619	2.79163	2.70844e-40	3.66561e-39	CTC-276P9.4
ENSG00000273706	-4.47637	2.20671e-127	8.12116e-126	LHX1
ENSG00000273604	-1.43327	6.56734e-74	1.46057e-72	C17orf96
ENSG00000273478	1.19144	1.59014e-05	6.35042e-05	RP11-465N4.5
ENSG00000273456	-1.00031	2.8715e-08	1.40713e-07	RP11-686O6.2
ENSG00000273320	1.09179	5.55359e-13	3.5219e-12	RP11-22N19.2
ENSG00000273143	-1.7926	3.50281e-06	1.4812e-05	RP11-525A16.4
ENSG00000273136	0.743963	3.81786e-37	4.88006e-36	NBPF26
ENSG00000273082	-1.76104	2.80112e-06	1.19619e-05	LL22NC03-32F9.1
ENSG00000273015	-0.938287	4.92192e-48	7.61529e-47	RP11-352M15.2
ENSG00000273004	-1.21466	3.57671e-05	0.000138075	GS1-279B7.2
ENSG00000272949	-0.774353	1.17547e-05	4.75137e-05	RP11-514P8.8
ENSG00000272870	-0.790493	1.12183e-06	4.92953e-06	RP11-798M19.6
ENSG00000272750	0.879116	2.86756e-05	0.000111716	RP11-378J18.8
ENSG00000272568	-3.01771	2.50683e-59	4.59959e-58	CTB-113D17.1
ENSG00000272516	-4.36631	2.38436e-66	4.82317e-65	RP11-573G6.9
ENSG00000272514	-1.52539	1.02379e-26	1.03943e-25	CFAP206
ENSG00000272508	1.78213	1.03241e-09	5.54727e-09	RP11-96C23.14
ENSG00000272485	-1.34656	6.09649e-06	2.52391e-05	RP11-284J1.1
ENSG00000272398	0.874305	1.58977e-285	1.66697e-283	CD24
ENSG00000272366	-1.72301	8.16161e-06	3.34808e-05	RP11-573G6.10
ENSG00000272341	0.972679	5.42459e-14	3.59925e-13	RP1-151F17.2
ENSG00000272320	1.30339	5.19061e-09	2.68697e-08	RP11-506K6.4
ENSG00000272168	-1.85855	2.40489e-37	3.08631e-36	CASC15
ENSG00000272159	-0.757734	9.07925e-10	4.89157e-09	RP11-350N15.6
ENSG00000272141	1.12479	1.2e-14	8.18102e-14	RP11-465B22.8
ENSG00000271931	-1.36941	2.5989e-05	0.000101645	RP11-63L7.5
ENSG00000271824	-3.15056	1.9816e-33	2.34978e-32	AC009014.3
ENSG00000271698	-1.52551	2.6071e-06	1.11482e-05	GS1-393G12.13
ENSG00000271275	-1.56409	3.88228e-05	0.000149463	AC007326.9
ENSG00000271155	2.74711	2.47677e-13	1.596e-12	RP11-435O5.5
ENSG00000270959	-0.615473	5.2328e-11	3.01423e-10	LPP-AS2
ENSG00000270885	-1.50591	3.29556e-37	4.22257e-36	RASL10B
ENSG00000270390	2.4385	8.19949e-10	4.42728e-09	RP11-470B22.1
ENSG00000270317	2.47276	9.73464e-11	5.53169e-10	AC004004.2
ENSG00000270181	1.69708	9.62633e-13	6.03765e-12	BIVM-ERCC5
ENSG00000270124	1.35907	5.11188e-05	0.000194437	RP11-118F19.1
ENSG00000269911	-1.72895	2.38949e-09	1.25771e-08	RP1-172N19.5
ENSG00000269821	0.599295	6.66464e-33	7.78174e-32	KCNQ1OT1
ENSG00000269516	-2.54296	4.18471e-87	1.07409e-85	CYP4F23P
ENSG00000276564	-0.752188	5.72528e-05	0.000216559	CTA-276F8.1
ENSG00000269364	2.40279	2.91638e-10	1.6142e-09	LINC01233
ENSG00000269194	-1.1317	6.68495e-05	0.000251371	AC006942.4
ENSG00000275538	1.76117	3.14324e-09	1.64443e-08	RNVU1-19
ENSG00000268869	-1.82468	4.454e-10	2.44412e-09	ESPNP
ENSG00000282024	-0.995239	5.55656e-05	0.000210425	RP3-467D16.3
ENSG00000268654	-3.05872	5.27167e-15	3.63583e-14	MIMT1
ENSG00000268225	-0.901611	2.90533e-07	1.32869e-06	CTD-2331H12.5
ENSG00000268088	-1.53241	0.000149056	0.000540045	AC093063.2
ENSG00000267904	-0.691063	0.000220076	0.000781161	CTC-429P9.5
ENSG00000267809	0.88859	5.66033e-11	3.25523e-10	NDUFV2P1
ENSG00000267801	0.682147	5.07243e-05	0.000193075	RP11-552F3.9
ENSG00000267784	-1.85096	2.05044e-07	9.48578e-07	RP11-171I2.1
ENSG00000267750	-0.711291	2.41948e-09	1.27286e-08	RUNDC3A-AS1
ENSG00000267701	-3.21169	9.5985e-17	7.09921e-16	NA
ENSG00000267649	-1.6127	2.09308e-08	1.03556e-07	CTD-2587H24.10
ENSG00000267520	0.732867	2.62026e-11	1.53281e-10	RP11-373L24.1
ENSG00000267424	-1.88317	8.04074e-07	3.56956e-06	CTD-2265O21.3
ENSG00000267414	-1.43398	6.18265e-07	2.76348e-06	RP11-456K23.1
ENSG00000267368	-0.611075	7.60872e-21	6.44595e-20	UPK3BL
ENSG00000267322	-0.660137	9.5144e-14	6.25447e-13	SNHG22
ENSG00000267265	0.685043	1.11047e-05	4.50057e-05	CTC-550B14.7
ENSG00000267259	-1.12991	4.74753e-33	5.56769e-32	CTD-2008P7.9
ENSG00000267234	-0.610333	0.000100242	0.000370316	CTB-184G21.3
ENSG00000267221	-0.766409	0.000133101	0.000484819	CTD-2132N18.2
ENSG00000267078	0.974334	0.000210787	0.000750271	RP11-666A8.9
ENSG00000267077	1.34711	1.94591e-05	7.69819e-05	RP11-127I20.5
ENSG00000267040	1.08051	4.28299e-08	2.07411e-07	RP11-35G9.3
ENSG00000267034	-3.07654	2.20759e-14	1.48696e-13	RP11-384O8.1
ENSG00000266970	-1.34461	0.000100341	0.00037064	RP11-806H10.4
ENSG00000279508	3.04922	1.12692e-19	9.13564e-19	AL589743.1
ENSG00000266820	1.38431	1.55788e-07	7.26276e-07	RP13-104F24.1
ENSG00000273338	-0.851623	2.77612e-10	1.53844e-09	RP11-386I14.4
ENSG00000266338	0.603927	3.86751e-52	6.40533e-51	NBPF15
ENSG00000266028	-0.982028	5.96579e-57	1.0576e-55	SRGAP2
ENSG00000265778	-3.24199	1.88564e-23	1.73439e-22	RP11-17M16.2
ENSG00000282390	-2.34377	5.8003e-11	3.33392e-10	RP11-29A19.2
ENSG00000264964	1.28486	2.82587e-05	0.000110132	RP11-888D10.3
ENSG00000277017	-1.53736	5.4651e-17	4.07791e-16	XXbac-B33L19.6
ENSG00000264714	-2.5513	1.07051e-10	6.07018e-10	RP11-21G15.1
ENSG00000264630	1.80156	6.74465e-06	2.78359e-05	PRKCA-AS1
ENSG00000270249	-1.2899	7.51299e-06	3.08794e-05	RP11-514P8.7
ENSG00000271254	-1.03915	6.36588e-117	2.16582e-115	AC240274.1
ENSG00000264364	-0.766606	3.95211e-47	6.02442e-46	DYNLL2
ENSG00000264357	2.05772	1.79675e-11	1.05901e-10	MIR4648
ENSG00000275077	1.38381	4.23102e-06	1.77575e-05	AC012363.1
ENSG00000263812	-1.04437	4.53383e-06	1.89811e-05	LINC00908
ENSG00000263639	-1.88347	2.20872e-06	9.4955e-06	MSMB
ENSG00000274210	-0.892179	2.70122e-09	1.41666e-08	U1
ENSG00000263535	-2.46386	1.49486e-25	1.47462e-24	AK4P1
ENSG00000263528	0.685817	6.35573e-09	3.26947e-08	IKBKE
ENSG00000273032	-1.21047	6.83277e-06	2.81778e-05	DGCR9
ENSG00000263427	4.3274	5.69307e-40	7.63076e-39	RP11-599B13.3
ENSG00000263327	0.632703	0.000167993	0.000604884	TAPT1-AS1
ENSG00000263280	-1.32244	7.00581e-06	2.88579e-05	LA16c-325D7.2
ENSG00000263155	-2.51222	1.8531e-10	1.03608e-09	MYZAP
ENSG00000261889	0.863758	9.83729e-17	7.27245e-16	RP11-473M20.16
ENSG00000261685	3.94327	1.26263e-47	1.9395e-46	RP11-401P9.4
ENSG00000261678	-3.34293	2.30953e-66	4.67771e-65	SCRT1
ENSG00000269891	-1.52587	0.000149565	0.000541704	ARHGAP19-SLIT1
ENSG00000261439	-2.80274	1.30069e-12	8.10867e-12	DKFZP434H168
ENSG00000261409	1.0147	4.67629e-08	2.26115e-07	RP6-24A23.7
ENSG00000261379	-1.97041	9.54841e-07	4.22362e-06	RP11-395N3.1
ENSG00000261335	-0.906508	3.85552e-13	2.46262e-12	RP11-318A15.2
ENSG00000261236	0.599417	1.94439e-40	2.64161e-39	BOP1
ENSG00000261189	-1.06726	4.02338e-08	1.95312e-07	RP3-512B11.3
ENSG00000261168	-1.6557	4.19295e-05	0.000160959	RP11-68I18.10
ENSG00000269113	-2.52198	4.03814e-10	2.22049e-09	TRABD2B
ENSG00000261115	5.05854	0	0	TMEM178B
ENSG00000261065	-1.21674	5.8281e-06	2.41686e-05	RP11-74C13.4
ENSG00000261064	1.48931	1.83842e-06	7.95921e-06	RP11-1000B6.3
ENSG00000261026	-1.72037	1.72743e-05	6.87211e-05	CTD-3247F14.2
ENSG00000260903	-4.72889	1.42306e-228	1.0993e-226	XKR7
ENSG00000260886	1.26137	2.60574e-05	0.000101901	TAT-AS1
ENSG00000260788	2.03857	7.70886e-09	3.9427e-08	RP11-298D21.1
ENSG00000262211	0.646481	9.95283e-05	0.000367766	CTD-2031P19.5
ENSG00000260711	1.18313	6.06447e-42	8.42519e-41	RP11-747H7.3
ENSG00000260686	-0.705677	3.59329e-06	1.51766e-05	CTB-36H16.2
ENSG00000260599	3.6838	7.92736e-23	7.15162e-22	CTC-457E21.1
ENSG00000260469	-5.39577	1.48315e-65	2.96454e-64	C15orf59-AS1
ENSG00000260418	0.8568	2.67001e-05	0.000104286	RP3-406A7.7
ENSG00000260401	-1.34374	2.10588e-20	1.7566e-19	RP11-800A3.4
ENSG00000260400	-0.919432	3.46646e-05	0.000133938	RP11-119F7.5
ENSG00000260296	-1.37584	3.61185e-11	2.09676e-10	RP11-395I6.3
ENSG00000260280	0.603492	7.18662e-05	0.00026957	SLX1B-SULT1A4
ENSG00000260276	0.603873	0.000132531	0.000482961	RP11-77H9.2
ENSG00000260231	1.7281	2.51942e-65	5.0233e-64	JHDM1D-AS1
ENSG00000260081	-0.969339	2.68062e-05	0.000104662	RP11-66N11.8
ENSG00000260009	-1.54764	0.000129763	0.00047347	RP11-65J21.1
ENSG00000259985	-1.46511	1.94091e-06	8.38815e-06	RP11-549B18.1
ENSG00000259725	0.837704	1.06972e-08	5.41225e-08	CTD-3032H12.1
ENSG00000259674	2.53063	2.01739e-19	1.62473e-18	RP11-356M20.1
ENSG00000259673	-0.613749	7.75924e-22	6.78001e-21	IQCH-AS1
ENSG00000259605	-1.20908	2.59654e-10	1.44116e-09	AC074212.5
ENSG00000259448	-1.34106	1.22158e-05	4.93025e-05	RP11-16E12.1
ENSG00000260253	1.71832	5.61682e-10	3.06277e-09	RP4-676L2.1
ENSG00000259319	-0.930675	5.24642e-05	0.000199176	RP11-293M10.6
ENSG00000259171	1.38479	6.28135e-41	8.61422e-40	RP11-903H12.5
ENSG00000259120	2.49304	6.53431e-25	6.32296e-24	SMIM6
ENSG00000265000	-1.269	2.34636e-05	9.21515e-05	RP11-453A12.1
ENSG00000258941	3.06698	1.36264e-23	1.25913e-22	RP11-407N17.3
ENSG00000268439	1.02519	5.14792e-14	3.42135e-13	RP3-461F17.3
ENSG00000258818	1.11253	4.02948e-80	9.60258e-79	RNASE4
ENSG00000258689	1.64687	1.60153e-06	6.96756e-06	LINC01269
ENSG00000258674	1.10312	1.38589e-06	6.05992e-06	CTC-260F20.3
ENSG00000258655	-0.607211	6.17979e-06	2.55641e-05	ARHGAP5-AS1
ENSG00000268119	0.648591	1.1254e-13	7.3572e-13	CTD-2561J22.5
ENSG00000258555	-1.11431	4.44769e-12	2.70473e-11	SPECC1L-ADORA2A
ENSG00000261371	1.36338	9.08059e-14	5.97298e-13	PECAM1
ENSG00000270276	-1.15925	1.68658e-16	1.23712e-15	HIST2H4B
ENSG00000258334	-1.90372	3.10833e-27	3.19638e-26	RP11-161H23.9
ENSG00000258315	0.66815	3.72687e-13	2.38235e-12	C17orf49
ENSG00000258297	-0.808743	7.59935e-08	3.61068e-07	RP11-658F2.8
ENSG00000258279	-1.74565	1.59619e-05	6.37299e-05	LINC00592
ENSG00000258056	0.690653	4.82112e-13	3.06866e-12	RP11-644F5.11
ENSG00000257883	-1.02799	2.23498e-12	1.37906e-11	RP11-497G19.1
ENSG00000266176	-1.40987	2.55034e-05	9.97873e-05	RP11-855A2.5
ENSG00000257727	0.943933	1.24636e-130	4.70601e-129	CNPY2
ENSG00000257704	-0.772752	8.94824e-06	3.65998e-05	INAFM1
ENSG00000265787	1.26554	7.80393e-18	5.99946e-17	CYP4F35P
ENSG00000257542	-1.52652	0.000110793	0.000407321	OR7E47P
ENSG00000257503	-2.09253	2.21754e-07	1.02307e-06	CYB5AP5
ENSG00000257456	1.61397	4.37709e-05	0.000167726	RP11-310I24.1
ENSG00000257342	0.726864	0.000259595	0.000912621	RP11-571M6.7
ENSG00000257341	-1.06149	0.000247586	0.000872799	AL928654.7
ENSG00000257270	-1.08466	1.88547e-06	8.15627e-06	RP11-521B24.5
ENSG00000257167	0.615606	9.4428e-20	7.67056e-19	TMPO-AS1
ENSG00000275719	1.01046	1.4516e-07	6.77917e-07	CTB-147N14.6
ENSG00000257108	-3.48974	5.23058e-44	7.55211e-43	NHLRC4
ENSG00000279196	1.56231	7.05126e-17	5.23581e-16	RP11-1072A3.3
ENSG00000257093	0.680596	4.06086e-83	9.94413e-82	KIAA1147
ENSG00000257002	1.16421	0.000110775	0.000407298	AP000438.2
ENSG00000256913	1.65879	3.03044e-05	0.000117789	RP1-102E24.6
ENSG00000256463	-3.22232	3.97508e-21	3.39912e-20	SALL3
ENSG00000273175	0.840238	9.37687e-08	4.43022e-07	RP11-11N7.4
ENSG00000256235	-0.801921	1.50489e-17	1.14645e-16	SMIM3
ENSG00000256229	-0.609823	2.2826e-19	1.83694e-18	ZNF486
ENSG00000273305	-1.52557	2.34411e-05	9.20746e-05	RP11-440D17.4
ENSG00000255874	-0.640593	1.05994e-05	4.3045e-05	LINC00346
ENSG00000255864	-2.2679	1.79842e-08	8.9532e-08	RP11-444D3.1
ENSG00000255860	3.16147	4.38509e-18	3.4014e-17	RP11-807H22.6
ENSG00000273598	-1.56574	8.45008e-09	4.30802e-08	PMS2P6
ENSG00000255737	-0.698482	7.35307e-13	4.64098e-12	AGAP2-AS1
ENSG00000268357	-0.77593	6.13236e-12	3.69757e-11	VN1R81P
ENSG00000270168	3.85937	5.40732e-109	1.71219e-107	LA16c-380H5.3
ENSG00000274349	0.838646	1.57374e-16	1.15515e-15	ZNF658
ENSG00000255571	-2.25829	1.22734e-95	3.42211e-94	MIR9-3HG
ENSG00000264527	1.5744	6.39859e-05	0.000241085	WI2-1959D15.1
ENSG00000255408	-2.88658	4.03968e-26	4.0335e-25	PCDHA3
ENSG00000258072	-0.885711	7.96938e-05	0.000297362	RP11-554D14.2
ENSG00000255240	0.671441	1.22238e-10	6.91299e-10	RP11-142C4.6
ENSG00000275143	-0.908153	2.01833e-06	8.7098e-06	SCARNA16
ENSG00000255129	-2.17316	1.22456e-21	1.06536e-20	RP11-839D17.3
ENSG00000255104	-1.52731	2.99082e-05	0.000116277	TBC1D26
ENSG00000255100	-0.716652	5.11655e-09	2.64906e-08	RP11-21L23.3
ENSG00000255085	-1.00878	5.36511e-41	7.37669e-40	AF186192.5
ENSG00000255071	1.93252	9.46219e-07	4.18606e-06	SAA2-SAA4
ENSG00000254981	-1.48917	1.93294e-21	1.67119e-20	RP11-350N15.3
ENSG00000254864	-1.58945	1.34645e-23	1.24489e-22	CTD-2516F10.4
ENSG00000254837	-0.672647	8.82165e-31	9.83357e-30	AP001372.2
ENSG00000254876	0.664659	6.74485e-08	3.21855e-07	RP11-23J9.5
ENSG00000254692	1.14779	2.98045e-08	1.45947e-07	RP11-468E2.1
ENSG00000254672	-1.37929	6.00772e-05	0.000226839	RP5-916O11.3
ENSG00000254631	-1.49409	0.00020705	0.00073771	RP11-702H23.4
ENSG00000254531	-1.38834	7.84634e-12	4.71149e-11	FLJ20021
ENSG00000254429	-1.78051	1.43778e-15	1.01325e-14	CTD-2562J17.7
ENSG00000254402	-1.39609	5.188e-12	3.14059e-11	LRRC24
ENSG00000254343	0.908404	2.37463e-06	1.01869e-05	RP11-760H22.2
ENSG00000254278	3.8574	2.43318e-26	2.4532e-25	RP11-278I4.2
ENSG00000254233	3.49325	6.22325e-23	5.63174e-22	RP11-242J7.1
ENSG00000254111	3.2581	1.02117e-22	9.18653e-22	RP11-150O12.5
ENSG00000254054	4.14769	1.36152e-33	1.6199e-32	RP11-156K13.3
ENSG00000254042	-1.14045	0.000169573	0.000610162	CTC-558O2.1
ENSG00000253972	3.21742	1.11929e-85	2.82749e-84	RP11-4K16.2
ENSG00000253944	1.44451	0.000238054	0.000841515	RP11-156K13.1
ENSG00000272638	-1.98552	6.75898e-07	3.01645e-06	GS1-114I9.1
ENSG00000253671	2.29894	2.94605e-11	1.71867e-10	RP11-806O11.1
ENSG00000253660	-0.68967	3.95919e-06	1.66604e-05	CTC-353G13.1
ENSG00000253632	4.06525	2.61913e-31	2.9598e-30	RP11-486M23.1
ENSG00000255201	-1.14781	1.46294e-23	1.35025e-22	RP11-350N15.4
ENSG00000253414	1.58648	2.36312e-07	1.08772e-06	RP11-150O12.6
ENSG00000262075	-1.63396	1.08653e-05	4.40634e-05	DKFZP434A062
ENSG00000253276	-1.01164	2.10717e-61	3.97812e-60	CCDC71L
ENSG00000272636	-0.980862	2.10562e-17	1.59309e-16	DOC2B
ENSG00000268204	-1.27585	1.12844e-08	5.69673e-08	CTD-3214H19.6
ENSG00000281571	1.88533	7.55069e-10	4.08732e-09	AC241585.2
ENSG00000277268	-4.15311	4.69579e-48	7.26893e-47	RP11-445F12.1
ENSG00000251791	-0.783362	2.36346e-18	1.84716e-17	SCARNA6
ENSG00000277258	-0.633405	4.88742e-12	2.96312e-11	PCGF2
ENSG00000251664	-1.18827	9.10756e-24	8.45237e-23	PCDHA12
ENSG00000251615	-0.64411	4.39645e-05	0.000168407	RP11-774O3.3
ENSG00000251600	-1.49479	1.60065e-05	6.39002e-05	RP11-673E1.1
ENSG00000256500	-0.880314	0.000159497	0.000575589	RP11-73M18.2
ENSG00000273066	-0.730794	7.32714e-12	4.40469e-11	RP11-216L13.19
ENSG00000251201	1.22818	1.91006e-23	1.75584e-22	TMED7-TICAM2
ENSG00000251191	1.92861	2.67025e-09	1.4011e-08	LINC00589
ENSG00000250942	-2.41755	3.14228e-24	2.97229e-23	ENPP7P11
ENSG00000250903	0.608837	1.59329e-10	8.94575e-10	GMDS-AS1
ENSG00000261687	1.66628	6.56793e-06	2.71241e-05	RP11-473C18.3
ENSG00000273749	1.21522	2.10138e-276	2.11334e-274	CYFIP1
ENSG00000250303	-2.30849	2.30296e-18	1.80075e-17	RP11-356J5.12
ENSG00000272727	1.99858	2.09906e-07	9.70226e-07	RP11-142A22.4
ENSG00000269699	-1.25854	1.21811e-10	6.89003e-10	ZIM2
ENSG00000250230	1.56432	3.48769e-16	2.52752e-15	RP11-855O10.2
ENSG00000279312	2.73827	7.92157e-41	1.08543e-39	RP3-331H24.7
ENSG00000263647	1.58973	3.22285e-07	1.46991e-06	RP11-927P21.5
ENSG00000250159	-2.43576	5.89992e-10	3.21276e-09	RP11-381K20.2
ENSG00000250120	-1.71102	1.08839e-203	7.13274e-202	PCDHA10
ENSG00000250067	1.3551	6.20265e-19	4.92348e-18	YJEFN3
ENSG00000249846	-0.922802	8.77834e-13	5.51877e-12	RP11-77P16.4
ENSG00000249684	0.61539	2.19874e-05	8.65666e-05	RP11-423H2.3
ENSG00000249647	1.71921	1.53343e-05	6.13315e-05	C5orf66-AS2
ENSG00000249464	2.51169	2.09935e-56	3.69507e-55	LINC01091
ENSG00000249409	0.757825	2.92616e-10	1.61934e-09	RP11-501E14.1
ENSG00000249378	1.71127	1.39454e-05	5.59652e-05	LINC01060
ENSG00000255545	3.83898	1.17636e-65	2.35722e-64	RP11-627G23.1
ENSG00000261488	-2.12838	1.01207e-10	5.74594e-10	RP11-757F18.5
ENSG00000249014	-0.845832	0.000231048	0.00081829	HMGN2P4
ENSG00000250413	2.64252	1.00898e-16	7.45394e-16	RP11-448G15.1
ENSG00000248527	0.816166	1.60094e-05	6.39037e-05	MTATP6P1
ENSG00000248405	-1.39067	9.31583e-08	4.40268e-07	PRR5-ARHGAP8
ENSG00000248383	-2.05719	5.97088e-89	1.55881e-87	PCDHAC1
ENSG00000275011	4.94895	9.97722e-52	1.63968e-50	RP11-599B13.9
ENSG00000272360	-1.40773	0.000146995	0.000532937	RP11-359I18.5
ENSG00000248050	1.49447	0.000153848	0.000556585	RP11-422N16.3
ENSG00000248015	-1.11394	1.25234e-06	5.4857e-06	AC005329.7
ENSG00000247982	0.826225	4.41051e-05	0.000168905	LINC00926
ENSG00000247809	1.23317	0.000183525	0.000657628	NR2F2-AS1
ENSG00000247596	-0.837992	2.42416e-26	2.44488e-25	TWF2
ENSG00000279267	-0.800812	7.12111e-15	4.89028e-14	RP11-395L14.18
ENSG00000247317	0.905938	1.24026e-10	7.00913e-10	RP11-273G15.2
ENSG00000246922	0.59705	3.22031e-05	0.00012482	UBAP1L
ENSG00000267250	1.1183	9.1597e-05	0.000339636	RP11-118B18.2
ENSG00000246350	1.50979	3.61097e-06	1.52472e-05	RP5-1186N24.3
ENSG00000246223	-0.965005	3.48743e-08	1.69862e-07	LINC01550
ENSG00000245904	1.94262	6.39954e-25	6.19442e-24	RP11-796E2.4
ENSG00000245848	0.626527	3.42376e-32	3.9401e-31	CEBPA
ENSG00000261594	-1.76381	1.01913e-05	4.14456e-05	TPBGL
ENSG00000244757	-1.6672	4.32216e-06	1.81281e-05	RP11-45A16.4
ENSG00000256537	-0.733956	5.56123e-43	7.8801e-42	SMIM10L1
ENSG00000244588	5.58779	9.81038e-97	2.76916e-95	RAD21L1
ENSG00000244567	-1.16026	3.73579e-05	0.000144049	AC096772.6
ENSG00000244457	-1.48092	0.000213914	0.000760387	ENO1P1
ENSG00000244405	4.65716	5.7792e-143	2.47092e-141	ETV5
ENSG00000244270	-2.03964	2.37169e-25	2.32737e-24	RPL32P29
ENSG00000244176	1.74225	5.88922e-06	2.44094e-05	RP11-810P12.1
ENSG00000243989	0.743276	3.3245e-30	3.65867e-29	ACY1
ENSG00000243978	-1.81372	1.39803e-06	6.11048e-06	RGAG1
ENSG00000269190	-0.873028	1.34254e-35	1.66935e-34	FBXO17
ENSG00000243627	-0.747945	0.000193033	0.000689765	AP000322.53
ENSG00000274928	-1.86395	4.10999e-06	1.72654e-05	KRT89P
ENSG00000242732	-0.880654	1.06397e-06	4.6843e-06	RGAG4
ENSG00000242575	2.41722	4.24913e-15	2.9401e-14	AC012501.3
ENSG00000278709	-1.82779	6.91794e-28	7.23488e-27	NKILA
ENSG00000242247	-0.672155	5.77801e-39	7.59813e-38	ARFGAP3
ENSG00000272841	0.862438	5.83921e-09	3.01346e-08	RP3-428L16.2
ENSG00000260693	1.50067	7.53469e-05	0.000281734	AC026150.8
ENSG00000242028	1.03969	2.42809e-30	2.67953e-29	HYPK
ENSG00000241839	-0.674882	0.000244984	0.000864294	PLEKHO2
ENSG00000241728	1.16885	4.25742e-07	1.92284e-06	AP001062.8
ENSG00000241679	1.82694	4.13861e-06	1.73788e-05	RP11-80H8.4
ENSG00000241484	-1.88984	7.81631e-250	6.75604e-248	ARHGAP8
ENSG00000241322	1.65457	5.46072e-07	2.44764e-06	CDRT1
ENSG00000272323	-1.20808	3.40405e-12	2.08155e-11	CTD-2517O10.6
ENSG00000245888	0.67689	3.99748e-05	0.000153751	FLJ21408
ENSG00000241111	-0.770449	0.000258456	0.000909115	PRICKLE2-AS1
ENSG00000272622	-3.49676	4.46782e-20	3.68072e-19	RP11-395N3.2
ENSG00000244968	-2.90982	1.79235e-45	2.66115e-44	LIFR-AS1
ENSG00000240809	1.19736	9.59896e-06	3.91262e-05	RP11-550F7.1
ENSG00000240499	2.08148	1.52216e-09	8.09581e-09	RP5-1101C3.1
ENSG00000240253	-1.89498	3.30439e-08	1.61291e-07	FAR2P3
ENSG00000275183	1.19659	3.31553e-24	3.13246e-23	LENG9
ENSG00000271367	-2.15985	6.86963e-10	3.72685e-09	RP3-483K16.4
ENSG00000276900	-0.713459	1.16885e-09	6.25938e-09	RP11-467L13.7
ENSG00000239677	-1.91591	1.50524e-07	7.02043e-07	PDZRN3-AS1
ENSG00000239672	0.733782	4.41972e-71	9.45465e-70	NME1
ENSG00000239440	-2.02254	3.60254e-08	1.75335e-07	RP11-260O18.1
ENSG00000239264	1.15658	0	0	TXNDC5
ENSG00000239219	1.78973	1.89226e-11	1.11346e-10	RP11-379K17.4
ENSG00000258203	-2.74873	3.21453e-33	3.78652e-32	RP1-228P16.3
ENSG00000238622	-0.938668	4.47482e-07	2.01733e-06	SNORD97
ENSG00000259780	1.88482	5.80495e-09	2.99626e-08	RP11-304L19.12
ENSG00000238227	0.603559	2.44797e-26	2.46578e-25	C9orf69
ENSG00000238197	-1.03187	1.07271e-22	9.642e-22	PAXBP1-AS1
ENSG00000261587	-2.67107	1.05964e-14	7.23803e-14	TMEM249
ENSG00000238145	4.10605	1.67182e-44	2.43916e-43	RP11-346M5.1
ENSG00000238122	0.686986	9.59074e-34	1.14448e-32	RP11-483I13.2
ENSG00000238117	3.0356	3.67215e-20	3.0346e-19	AP004372.1
ENSG00000238034	-1.53417	0.000152333	0.000551353	RP5-1185K9.1
ENSG00000261664	1.58792	1.08087e-27	1.12524e-26	TTC39A-AS1
ENSG00000257150	1.63466	3.30622e-08	1.61356e-07	PGAM1P5
ENSG00000237943	1.70448	6.74297e-09	3.46087e-08	PRKCQ-AS1
ENSG00000237807	1.00827	6.1607e-05	0.000232369	RP11-400K9.4
ENSG00000237750	-3.26058	8.99566e-17	6.65795e-16	AC007740.1
ENSG00000279406	-1.1748	2.8313e-12	1.7403e-11	RP11-327E2.5
ENSG00000237742	-2.75992	5.17926e-33	6.06955e-32	RP11-624M8.1
ENSG00000237604	2.23946	1.62592e-10	9.12416e-10	AP001056.1
ENSG00000237541	2.6176	8.8341e-188	5.28081e-186	HLA-DQA2
ENSG00000237517	-0.880654	1.53921e-17	1.17204e-16	DGCR5
ENSG00000237476	-1.97883	8.75795e-07	3.88095e-06	XXbac-B135H6.15
ENSG00000242173	-1.8745	8.57296e-13	5.39284e-12	ARHGDIG
ENSG00000260196	-0.728302	2.43755e-05	9.55918e-05	RP1-239B22.5
ENSG00000237440	-0.597615	5.89336e-29	6.2909e-28	ZNF737
ENSG00000237379	1.56853	2.20223e-05	8.66826e-05	CBX1P3
ENSG00000260303	1.46726	0.000200748	0.000716293	RP11-203B7.2
ENSG00000271727	-1.0862	2.02797e-08	1.00428e-07	RP11-532F6.4
ENSG00000237285	-1.54643	6.41582e-05	0.000241649	HNRNPA1P2
ENSG00000237172	-3.09183	1.02601e-49	1.62843e-48	B3GNT9
ENSG00000250731	1.25811	7.60333e-05	0.000284234	TPM3P6
ENSG00000272106	-0.595069	8.05694e-12	4.83431e-11	RP11-345P4.9
ENSG00000258881	0.780862	0.000183731	0.00065829	AC007040.11
ENSG00000267395	-0.933769	8.86186e-05	0.000329127	AC074212.6
ENSG00000236901	-0.87748	6.57749e-32	7.53689e-31	MIR600HG
ENSG00000236714	-1.06553	4.19362e-07	1.89483e-06	AC005592.1
ENSG00000236699	4.40216	3.25519e-176	1.77349e-174	ARHGEF38
ENSG00000236516	-1.35058	2.25691e-05	8.87256e-05	KLF2P4
ENSG00000236431	-1.39067	8.29762e-05	0.000308924	AC009237.11
ENSG00000236296	-1.93536	5.39989e-19	4.29908e-18	GUSBP5
ENSG00000236289	4.25409	5.81472e-48	8.97493e-47	GACAT3
ENSG00000235961	2.35367	1.69631e-10	9.50414e-10	PNMA6A
ENSG00000235954	-0.781906	2.13914e-24	2.03425e-23	TTC28-AS1
ENSG00000235823	1.41805	4.28367e-55	7.41321e-54	OLMALINC
ENSG00000235631	2.00372	6.71485e-08	3.20471e-07	RNF148
ENSG00000235584	-3.31737	0	0	AC008268.1
ENSG00000235578	-1.32758	7.43677e-06	3.05819e-05	XXbac-B33L19.4
ENSG00000235568	1.74401	3.75695e-39	4.95877e-38	NFAM1
ENSG00000235478	-2.25313	5.12723e-10	2.80537e-09	AC006946.15
ENSG00000270179	-1.30949	7.9643e-05	0.000297207	RP11-159N11.4
ENSG00000235501	1.56169	2.51499e-28	2.64927e-27	RP4-639F20.1
ENSG00000235343	5.79274	1.4179e-89	3.72909e-88	AC005301.8
ENSG00000235314	-0.832903	2.01141e-20	1.67912e-19	LINC00957
ENSG00000274370	-2.57741	5.86691e-13	3.71481e-12	AC144831.3
ENSG00000235209	-1.91712	4.83837e-16	3.48426e-15	CTA-150C2.13
ENSG00000253882	-1.32307	8.70304e-38	1.12412e-36	RP11-61L23.2
ENSG00000235169	0.946128	1.12778e-15	7.97953e-15	SMIM1
ENSG00000235123	3.42324	1.33328e-66	2.70556e-65	DSCAM-AS1
ENSG00000235092	-0.796987	1.41097e-05	5.65891e-05	ID2-AS1
ENSG00000235091	-2.75528	1.04268e-93	2.84521e-92	WI2-85898F10.1
ENSG00000235007	-1.81152	1.65579e-06	7.19483e-06	RP11-344B5.4
ENSG00000235005	1.35041	0.000259383	0.000911975	RP11-195M16.1
ENSG00000234869	0.620013	6.54801e-05	0.000246396	RP3-439F8.1
ENSG00000234814	1.20182	4.69273e-07	2.11289e-06	SVILP1
ENSG00000244306	1.01182	3.41419e-09	1.7821e-08	LINC01296
ENSG00000234752	-1.80401	4.44659e-11	2.56783e-10	RP11-428L9.1
ENSG00000234745	-0.975975	3.24223e-85	8.1453e-84	HLA-B
ENSG00000265962	-2.06277	2.66008e-07	1.2188e-06	GACAT2
ENSG00000234684	0.650653	2.17654e-06	9.35968e-06	SDCBP2-AS1
ENSG00000234602	1.35233	1.72711e-22	1.53943e-21	MCIDAS
ENSG00000234484	2.09934	8.5173e-08	4.03484e-07	RP1-55C23.7
ENSG00000234432	-3.95845	5.18144e-105	1.58876e-103	RP11-1275H24.1
ENSG00000241388	2.16738	8.81042e-51	1.42091e-49	HNF1A-AS1
ENSG00000240541	-4.00338	2.11297e-27	2.18406e-26	TM4SF1-AS1
ENSG00000234115	-1.62345	2.0578e-06	8.87653e-06	RP11-288G3.4
ENSG00000234085	3.80803	1.86297e-28	1.96893e-27	RP11-368M16.7
ENSG00000234062	-0.590685	0.000267619	0.000939588	RP11-308D16.2
ENSG00000233871	0.791567	2.61198e-07	1.19744e-06	DLG5-AS1
ENSG00000233834	0.907696	1.99433e-06	8.61203e-06	AC005083.1
ENSG00000233728	-1.30068	0.000174868	0.000628084	RP11-109P14.9
ENSG00000250522	1.55829	6.79695e-05	0.000255373	AC004066.3
ENSG00000233718	1.36249	1.10438e-22	9.92394e-22	MYCNOS
ENSG00000239282	-0.716771	6.29332e-12	3.79176e-11	GATSL3
ENSG00000261716	-0.597207	4.94939e-12	2.99955e-11	RP11-196G18.22
ENSG00000233461	0.706471	1.20951e-06	5.30389e-06	RP11-295G20.2
ENSG00000233421	0.891397	4.87021e-14	3.23881e-13	RP5-875O13.1
ENSG00000233255	1.77203	5.67925e-08	2.72797e-07	AC019181.2
ENSG00000233237	3.19702	2.15003e-172	1.13465e-170	LINC00472
ENSG00000233154	-1.33573	5.04543e-10	2.76156e-09	RP4-655J12.4
ENSG00000233017	-1.17309	0.000172672	0.000620753	RP5-908M14.5
ENSG00000280587	1.94684	2.88732e-20	2.3978e-19	LINC01348
ENSG00000232956	0.694913	1.66058e-37	2.13968e-36	SNHG15
ENSG00000232767	-1.36524	2.91114e-20	2.41633e-19	RP11-498B4.5
ENSG00000232712	0.914896	0.00015342	0.000555101	KIZ-AS1
ENSG00000232653	2.02529	9.10793e-41	1.24585e-39	GOLGA8N
ENSG00000232638	-2.22367	8.99279e-28	9.38638e-27	RP11-379F12.4
ENSG00000232633	-1.42006	3.19598e-05	0.000123952	CTD-2201G3.1
ENSG00000232533	-1.3049	7.08988e-09	3.63426e-08	AC093673.5
ENSG00000232504	1.64699	1.7584e-09	9.32127e-09	ST3GAL5-AS1
ENSG00000232354	0.902778	5.40474e-12	3.2687e-11	VIPR1-AS1
ENSG00000272695	-1.40442	7.07953e-07	3.15467e-06	GAS6-AS2
ENSG00000232300	-1.21112	1.87451e-20	1.56647e-19	FAM215B
ENSG00000232295	1.15731	2.13004e-06	9.16834e-06	RP11-154D6.1
ENSG00000232233	1.22713	3.4823e-20	2.8792e-19	RP11-573D15.2
ENSG00000232124	0.788656	7.33369e-23	6.61791e-22	AP001057.1
ENSG00000265148	-0.767054	3.24183e-05	0.000125624	BZRAP1-AS1
ENSG00000279286	1.18607	1.13311e-05	4.5865e-05	RP11-248B24.1
ENSG00000231982	1.74684	4.01224e-16	2.90109e-15	RP11-573D15.1
ENSG00000231918	1.18809	4.91683e-05	0.000187397	AC007682.1
ENSG00000231840	-1.26332	1.6531e-05	6.58871e-05	AC073342.12
ENSG00000231806	-0.78286	8.23569e-07	3.65306e-06	PCAT7
ENSG00000231789	-1.22112	2.42445e-07	1.11467e-06	PIK3CD-AS2
ENSG00000231764	-2.13547	2.63216e-26	2.64798e-25	DLX6-AS1
ENSG00000244383	-2.01451	4.88175e-07	2.19522e-06	FAM3D-AS1
ENSG00000231672	-1.79667	8.15904e-06	3.34746e-05	DIRC3
ENSG00000255302	-0.694463	9.12124e-79	2.13548e-77	EID1
ENSG00000236404	-0.890286	6.41569e-05	0.000241649	VLDLR-AS1
ENSG00000233723	-1.88985	3.80693e-21	3.25969e-20	LINC01122
ENSG00000231483	3.05843	1.294e-22	1.15888e-21	RP11-336A10.5
ENSG00000231439	-0.917461	2.74867e-12	1.69081e-11	WASIR2
ENSG00000231367	-1.34016	1.42283e-06	6.21632e-06	AC016995.3
ENSG00000231188	1.40551	0.000179228	0.000642951	RP11-34D15.2
ENSG00000254793	1.501	5.47045e-06	2.27297e-05	FDPSP4
ENSG00000231156	-1.53415	0.000152812	0.000553026	AC093702.1
ENSG00000231119	-0.717674	3.39471e-07	1.54631e-06	RP4-569M23.2
ENSG00000126803	-3.09187	2.49944e-129	9.32727e-128	HSPA2
ENSG00000181885	0.871053	1.99856e-86	5.08479e-85	CLDN7
ENSG00000181788	-0.755674	2.99337e-34	3.62892e-33	SIAH2
ENSG00000181444	-1.82955	2.8312e-71	6.07682e-70	ZNF467
ENSG00000223764	-4.0493	2.97536e-148	1.3216e-146	RP11-54O7.3
ENSG00000224805	-0.882453	1.61307e-07	7.51351e-07	LINC00853
ENSG00000180998	-0.636593	4.09838e-17	3.07388e-16	GPR137C
ENSG00000180964	-6.04665	2.05985e-179	1.14767e-177	TCEAL8
ENSG00000214100	-2.89457	1.16316e-16	8.57117e-16	AC079776.2
ENSG00000180879	1.15734	5.7458e-232	4.52602e-230	SSR4
ENSG00000169704	1.61909	3.19219e-05	0.000123835	GP9
ENSG00000138642	-1.18626	1.58902e-09	8.44301e-09	HERC6
ENSG00000169047	-3.04746	0	0	IRS1
ENSG00000180616	-0.810989	4.23525e-36	5.3075e-35	SSTR2
ENSG00000108852	-1.46941	3.029e-134	1.18568e-132	MPP2
ENSG00000180539	-0.902766	5.16495e-05	0.000196386	C9orf139
ENSG00000186094	-1.07933	1.07574e-13	7.04625e-13	AGBL4
ENSG00000180488	0.588203	1.46174e-43	2.09162e-42	FAM73A
ENSG00000085831	0.789528	9.1109e-130	3.41589e-128	TTC39A
ENSG00000223802	-1.21848	3.79761e-37	4.85611e-36	CERS1
ENSG00000180185	-0.628892	1.09477e-38	1.43374e-37	FAHD1
ENSG00000230873	-0.629909	3.2026e-13	2.05296e-12	STMND1
ENSG00000180178	-3.29878	4.85199e-60	9.0216e-59	FAR2P1
ENSG00000226122	-1.75329	1.15507e-05	4.67352e-05	DDC-AS1
ENSG00000180044	1.05804	0.000117422	0.000430503	C3orf80
ENSG00000184432	0.621494	1.84804e-105	5.68837e-104	COPB2
ENSG00000114315	2.40126	0	0	HES1
ENSG00000103942	-1.38034	5.44271e-269	5.13461e-267	HOMER2
ENSG00000173621	-1.19495	1.06711e-51	1.75191e-50	LRFN4
ENSG00000231240	-3.71979	5.71665e-23	5.17769e-22	KLF2P1
ENSG00000179841	-0.647943	5.04508e-06	2.10306e-05	AKAP5
ENSG00000233184	1.23591	2.31417e-18	1.80908e-17	RP11-421L21.3
ENSG00000179477	3.46687	5.82998e-22	5.11098e-21	ALOX12B
ENSG00000179456	3.11303	1.73971e-185	1.02275e-183	ZBTB18
ENSG00000179403	1.19898	6.89081e-66	1.38775e-64	VWA1
ENSG00000179222	1.17539	1.10756e-114	3.68966e-113	MAGED1
ENSG00000164985	-0.716399	9.83019e-114	3.24772e-112	PSIP1
ENSG00000179104	-1.09444	1.07591e-64	2.13058e-63	TMTC2
ENSG00000186522	-0.609946	3.53829e-58	6.3859e-57	2017-09-10
ENSG00000179051	-0.634403	6.55924e-87	1.67683e-85	RCC2
ENSG00000196748	-2.1793	1.68802e-08	8.418e-08	CLPSL2
ENSG00000179023	-1.74847	1.76252e-14	1.19271e-13	KLHDC7A
ENSG00000178882	-2.2733	1.49203e-14	1.01438e-13	FAM101A
ENSG00000178726	-2.39195	2.35057e-22	2.08468e-21	THBD
ENSG00000170965	-2.75537	2.40451e-48	3.74567e-47	PLAC1
ENSG00000178607	1.12528	2.35939e-62	4.49945e-61	ERN1
ENSG00000178538	3.82646	4.03562e-49	6.36406e-48	CA8
ENSG00000126215	1.00187	1.47921e-94	4.07114e-93	XRCC3
ENSG00000226777	-2.49439	1.83515e-22	1.63391e-21	KIAA0125
ENSG00000207205	2.42608	1.97132e-13	1.27611e-12	RNVU1-15
ENSG00000096060	1.23942	6.35729e-75	1.42675e-73	FKBP5
ENSG00000178162	-3.41466	1.07159e-52	1.78678e-51	FAR2P2
ENSG00000077157	-0.760901	6.64177e-27	6.78195e-26	PPP1R12B
ENSG00000124507	-1.1293	1.08634e-13	7.11346e-13	PACSIN1
ENSG00000214128	0.946081	7.63876e-10	4.13359e-09	TMEM213
ENSG00000177830	0.641359	7.7777e-52	1.28018e-50	CHID1
ENSG00000177700	0.677822	8.66174e-38	1.11924e-36	POLR2L
ENSG00000143079	-0.683672	3.09864e-18	2.41466e-17	CTTNBP2NL
ENSG00000177675	1.76565	1.0469e-05	4.25263e-05	CD163L1
ENSG00000171631	-1.94637	1.38286e-31	1.57722e-30	P2RY6
ENSG00000177483	-1.19794	1.97513e-08	9.80087e-08	RBM44
ENSG00000167552	-1.39931	0	0	TUBA1A
ENSG00000177359	-0.736797	0.000262397	0.000922067	OVOS2
ENSG00000048342	-1.13651	1.82714e-40	2.48443e-39	CC2D2A
ENSG00000226124	1.01664	1.4377e-08	7.20448e-08	FTCDNL1
ENSG00000167131	-0.684263	8.43979e-05	0.000313925	CCDC103
ENSG00000177335	-0.86253	0.000220192	0.000781485	C8orf31
ENSG00000109466	4.36782	8.92474e-210	6.04708e-208	KLHL2
ENSG00000273148	-0.804405	0.000207122	0.000737881	RP5-1068E13.7
ENSG00000108861	0.623947	3.267e-55	5.65685e-54	DUSP3
ENSG00000205002	-1.87198	3.46026e-24	3.26535e-23	AARD
ENSG00000177191	-1.37804	3.16991e-10	1.75211e-09	B3GNT8
ENSG00000177156	0.915299	3.93711e-173	2.09854e-171	TALDO1
ENSG00000049860	1.93986	0	0	HEXB
ENSG00000140545	-1.29227	1.01946e-29	1.10708e-28	MFGE8
ENSG00000176903	-0.871339	8.09533e-84	2.00075e-82	PNMA1
ENSG00000159176	-1.62271	0	0	CSRP1
ENSG00000176788	-3.46414	4.94331e-148	2.19268e-146	BASP1
ENSG00000176749	-2.14591	1.32837e-84	3.30861e-83	CDK5R1
ENSG00000033327	-1.00367	1.35203e-95	3.76321e-94	GAB2
ENSG00000182718	-4.75043	0	0	ANXA2
ENSG00000176531	-1.30077	3.51194e-91	9.39877e-90	PHLDB3
ENSG00000157600	-1.12337	3.12294e-149	1.39295e-147	TMEM164
ENSG00000176490	-3.36625	1.61548e-203	1.05654e-201	DIRAS1
ENSG00000228363	0.643044	0.000163208	0.00058845	AC015971.2
ENSG00000176371	-0.927232	3.70039e-30	4.06814e-29	ZSCAN2
ENSG00000176148	0.653661	1.1206e-27	1.16622e-26	TCP11L1
ENSG00000176125	0.653641	0.000181359	0.000650229	UFSP1
ENSG00000176046	1.96946	3.38393e-86	8.59583e-85	NUPR1
ENSG00000175899	-1.56814	4.97948e-09	2.57934e-08	A2M
ENSG00000167085	0.732483	3.12154e-83	7.66742e-82	PHB
ENSG00000204140	-3.40889	2.67362e-18	2.08701e-17	CLPSL1
ENSG00000133424	-1.03575	5.21684e-144	2.24851e-142	LARGE
ENSG00000136436	0.956242	3.96606e-228	3.04169e-226	CALCOCO2
ENSG00000253051	-1.95065	8.96332e-07	3.96975e-06	SNORA31
ENSG00000175591	-1.29509	2.15881e-22	1.91887e-21	P2RY2
ENSG00000175556	-1.53696	1.81668e-05	7.20925e-05	LONRF3
ENSG00000175471	3.08715	8.31865e-145	3.61466e-143	MCTP1
ENSG00000176406	-0.877231	9.78785e-66	1.965e-64	RIMS2
ENSG00000182013	-2.00613	0	0	PNMAL1
ENSG00000203805	-2.37678	1.40822e-09	7.5073e-09	PLPP4
ENSG00000175161	1.39322	4.07566e-105	1.2509e-103	CADM2
ENSG00000175115	-0.74158	7.55456e-12	4.53969e-11	PACS1
ENSG00000196421	-0.655095	7.5297e-08	3.58025e-07	LINC00176
ENSG00000018510	1.03822	4.85307e-155	2.22997e-153	AGPS
ENSG00000174951	-0.804395	9.76734e-40	1.30262e-38	FUT1
ENSG00000174839	0.627665	1.22128e-54	2.09649e-53	DENND6A
ENSG00000240038	-0.88558	7.32164e-10	3.96668e-09	AMY2B
ENSG00000174500	-2.62515	1.97147e-17	1.49336e-16	GCSAM
ENSG00000280753	-0.99728	0.0001413	0.000513222	AC044907.1
ENSG00000177731	0.622177	4.72151e-57	8.38416e-56	FLII
ENSG00000174236	1.27066	7.22109e-05	0.000270704	REP15
ENSG00000063015	-3.46086	3.7888e-53	6.374e-52	SEZ6
ENSG00000112306	1.54769	0	0	RPS12
ENSG00000108639	1.07102	4.43332e-160	2.12567e-158	SYNGR2
ENSG00000173905	0.621431	1.38723e-54	2.37882e-53	GOLIM4
ENSG00000137699	1.6528	3.0633e-05	0.000119023	TRIM29
ENSG00000173868	2.18758	5.02689e-17	3.75531e-16	PHOSPHO1
ENSG00000132692	-2.20569	4.53095e-08	2.1922e-07	BCAN
ENSG00000002933	0.682638	1.62919e-24	1.55578e-23	TMEM176A
ENSG00000173511	-2.21771	5.29314e-47	8.04562e-46	VEGFB
ENSG00000124786	0.607163	3.71827e-16	2.69341e-15	SLC35B3
ENSG00000243350	-3.6749	1.90938e-78	4.45397e-77	RP11-379F12.3
ENSG00000173334	0.779854	1.86844e-36	2.35069e-35	TRIB1
ENSG00000173088	1.88185	5.01558e-19	3.9951e-18	C10orf131
ENSG00000170819	-1.65878	1.6663e-05	6.63801e-05	BFSP2
ENSG00000172967	1.77364	8.42965e-06	3.45361e-05	XKR3
ENSG00000225953	-3.0325	1.55351e-18	1.22101e-17	SATB2-AS1
ENSG00000172935	-1.25402	1.74772e-20	1.46243e-19	MRGPRF
ENSG00000172927	1.17842	3.52875e-07	1.60553e-06	MYEOV
ENSG00000172889	0.606449	2.22296e-20	1.85282e-19	EGFL7
ENSG00000172819	-1.21995	5.42757e-76	1.23193e-74	RARG
ENSG00000180304	-0.963795	3.8663e-66	7.80607e-65	OAZ2
ENSG00000172731	-0.815047	4.47985e-16	3.23336e-15	LRRC20
ENSG00000152217	-3.88962	0	0	SETBP1
ENSG00000162616	-0.713068	4.60374e-12	2.79484e-11	DNAJB4
ENSG00000172725	0.644842	1.97574e-70	4.19284e-69	CORO1B
ENSG00000104419	-4.51967	2.43832e-78	5.67539e-77	NDRG1
ENSG00000064300	2.07297	3.90006e-20	3.21795e-19	NGFR
ENSG00000163281	0.803738	2.08114e-17	1.57494e-16	GNPDA2
ENSG00000177868	-1.22035	5.28905e-47	8.04323e-46	SVBP
ENSG00000165644	1.69172	3.57697e-98	1.03245e-96	COMTD1
ENSG00000172269	0.667075	1.24209e-17	9.48499e-17	DPAGT1
ENSG00000172232	-2.24498	1.50514e-14	1.02286e-13	AZU1
ENSG00000172216	1.0592	3.6112e-53	6.08161e-52	CEBPB
ENSG00000176884	-1.46231	1.07523e-28	1.14129e-27	GRIN1
ENSG00000172197	-1.67073	1.30191e-109	4.14291e-108	MBOAT1
ENSG00000143409	-0.990616	1.59751e-76	3.6519e-75	FAM63A
ENSG00000172057	-0.733356	5.78152e-79	1.35457e-77	ORMDL3
ENSG00000077063	-0.979513	1.10104e-207	7.41312e-206	CTTNBP2
ENSG00000171989	1.3828	0.000154771	0.000559733	LDHAL6B
ENSG00000163939	-0.611003	5.00352e-44	7.24061e-43	PBRM1
ENSG00000083814	0.733162	1.06617e-08	5.39684e-08	ZNF671
ENSG00000171735	-0.665181	2.76655e-30	3.04883e-29	CAMTA1
ENSG00000171617	0.92394	5.14643e-103	1.54833e-101	ENC1
ENSG00000271911	-1.13832	9.32053e-06	3.80495e-05	RP11-532F6.5
ENSG00000171522	-0.946298	6.44988e-14	4.27067e-13	PTGER4
ENSG00000171503	0.828815	7.16417e-34	8.58439e-33	ETFDH
ENSG00000171488	-2.48358	1.82494e-54	3.12438e-53	LRRC8C
ENSG00000171451	-0.979063	7.00206e-82	1.69904e-80	DSEL
ENSG00000171448	-0.779173	1.89004e-23	1.73794e-22	ZBTB26
ENSG00000171435	-2.5038	3.08849e-40	4.16939e-39	KSR2
ENSG00000140396	0.811879	2.69465e-184	1.55836e-182	NCOA2
ENSG00000279386	1.10821	0.000232302	0.000822548	AC021106.1
ENSG00000205542	-3.6644	0	0	TMSB4X
ENSG00000257337	-0.723235	1.48493e-34	1.81328e-33	RP11-983P16.4
ENSG00000139144	-3.75347	2.34735e-53	3.9636e-52	PIK3C2G
ENSG00000171243	5.41422	1.2571e-67	2.58045e-66	SOSTDC1
ENSG00000261359	2.74082	2.95963e-38	3.84763e-37	PYCARD-AS1
ENSG00000168539	4.86717	3.89705e-180	2.18269e-178	CHRM1
ENSG00000171206	0.837252	9.48569e-45	1.38966e-43	TRIM8
ENSG00000251867	-1.60374	3.74386e-05	0.000144326	RP11-48B3.5
ENSG00000171159	-0.844898	2.46616e-33	2.91788e-32	C9orf16
ENSG00000171119	-1.68854	1.0402e-15	7.3729e-15	NRTN
ENSG00000171608	-0.746538	0.000182095	0.00065272	PIK3CD
ENSG00000171084	0.650311	5.77639e-06	2.39635e-05	FAM86JP
ENSG00000101144	-0.775131	4.21181e-24	3.96171e-23	BMP7
ENSG00000115307	0.820255	2.52148e-83	6.2078e-82	AUP1
ENSG00000170791	2.5897	2.39423e-183	1.37222e-181	CHCHD7
ENSG00000176225	0.644614	6.24058e-51	1.00951e-49	RTTN
ENSG00000011258	-0.848015	3.26244e-44	4.74039e-43	MBTD1
ENSG00000182600	-1.59569	1.50865e-15	1.0625e-14	C2orf82
ENSG00000170745	1.33331	6.21932e-130	2.33451e-128	KCNS3
ENSG00000170629	-1.62322	1.11551e-78	2.60593e-77	DPY19L2P2
ENSG00000170624	-2.36132	4.09335e-09	2.12792e-08	SGCD
ENSG00000250305	-0.678493	2.48094e-20	2.06569e-19	KIAA1456
ENSG00000271880	2.04572	1.11831e-45	1.66968e-44	AGAP11
ENSG00000170558	-5.54249	0	0	CDH2
ENSG00000170498	-0.932875	9.36798e-05	0.000347118	KISS1
ENSG00000155906	-1.13731	2.71215e-76	6.17787e-75	RMND1
ENSG00000179528	-1.29297	7.86679e-11	4.49103e-10	LBX2
ENSG00000279095	1.02077	3.92678e-24	3.69795e-23	AC092066.1
ENSG00000171202	0.595292	5.15545e-11	2.97075e-10	TMEM126A
ENSG00000170421	1.05309	4.01823e-193	2.48563e-191	KRT8
ENSG00000170293	-0.71296	1.85632e-07	8.61391e-07	CMTM8
ENSG00000004777	-0.586205	2.15984e-12	1.33425e-11	ARHGAP33
ENSG00000170271	-1.01776	2.5044e-07	1.1501e-06	FAXDC2
ENSG00000178821	-0.685784	0.000184381	0.000660472	TMEM52
ENSG00000048471	0.597938	3.89638e-20	3.21575e-19	SNX29
ENSG00000177679	-5.13257	1.18865e-79	2.80756e-78	SRRM3
ENSG00000170142	-0.683816	2.04446e-42	2.86771e-41	UBE2E1
ENSG00000270761	0.937532	4.72722e-06	1.97434e-05	RP11-385F7.1
ENSG00000178796	-2.26019	1.60167e-10	8.99125e-10	RIIAD1
ENSG00000171714	1.10349	3.17794e-138	1.303e-136	ANO5
ENSG00000170011	-2.18722	5.13377e-119	1.78266e-117	MYRIP
ENSG00000130035	-0.799738	0.000145534	0.000527882	GALNT8
ENSG00000169918	-1.12696	3.15177e-12	1.93246e-11	OTUD7A
ENSG00000189420	2.07429	2.00918e-07	9.30298e-07	ZFP92
ENSG00000235865	1.08638	4.04834e-11	2.34165e-10	GSN-AS1
ENSG00000169783	-2.12407	2.25007e-94	6.18208e-93	LINGO1
ENSG00000160460	-3.94896	1.52633e-166	7.69929e-165	SPTBN4
ENSG00000169738	0.931223	1.05984e-57	1.89356e-56	DCXR
ENSG00000003402	1.28071	2.38969e-270	2.28816e-268	CFLAR
ENSG00000169682	0.604988	6.55795e-30	7.16535e-29	SPNS1
ENSG00000169627	0.617082	7.11487e-19	5.63638e-18	BOLA2B
ENSG00000010404	-1.45003	4.35242e-119	1.51463e-117	IDS
ENSG00000188483	0.718216	4.83728e-28	5.06719e-27	IER5L
ENSG00000260804	-0.885375	3.52501e-35	4.34928e-34	PKI55
ENSG00000170873	3.5945	0	0	MTSS1
ENSG00000169418	1.72488	1.67307e-07	7.78391e-07	NPR1
ENSG00000169403	2.93843	3.94713e-90	1.04325e-88	PTAFR
ENSG00000265298	1.26264	6.36889e-09	3.27571e-08	RP13-104F24.3
ENSG00000111252	-0.702697	4.06625e-13	2.59515e-12	SH2B3
ENSG00000169213	0.801492	5.28232e-11	3.04221e-10	RAB3B
ENSG00000169193	0.942949	2.32948e-13	1.5023e-12	CCDC126
ENSG00000169071	-1.52009	5.43799e-06	2.26036e-05	ROR2
ENSG00000168913	-3.50683	9.10872e-252	7.98099e-250	ENHO
ENSG00000006016	0.91033	5.50653e-07	2.46748e-06	CRLF1
ENSG00000168743	-2.27099	7.62943e-141	3.1895e-139	NPNT
ENSG00000168679	-0.862195	1.04687e-13	6.86208e-13	SLC16A4
ENSG00000106299	0.756184	2.19211e-68	4.54348e-67	WASL
ENSG00000196562	-3.16488	0	0	SULF2
ENSG00000240891	2.38955	1.23424e-10	6.97634e-10	PLCXD2
ENSG00000159640	1.27549	2.69455e-10	1.49426e-09	ACE
ENSG00000168487	-1.15138	1.21414e-13	7.92406e-13	BMP1
ENSG00000168447	-1.97307	2.26713e-13	1.46327e-12	SCNN1B
ENSG00000251322	-0.618878	2.32328e-06	9.97328e-06	SHANK3
ENSG00000168421	-0.850191	1.79532e-15	1.26051e-14	RHOH
ENSG00000104356	0.63613	4.16337e-23	3.78801e-22	POP1
ENSG00000168283	-2.43719	0	0	BMI1
ENSG00000178038	2.9304	1.56068e-134	6.15438e-133	ALS2CL
ENSG00000170035	3.07395	9.17158e-43	1.29557e-41	UBE2E3
ENSG00000143556	2.39333	5.82421e-11	3.34646e-10	S100A7
ENSG00000159712	1.53281	4.2242e-13	2.69488e-12	ANKRD18CP
ENSG00000163867	-0.588995	1.29066e-16	9.49978e-16	ZMYM6
ENSG00000168209	-0.858221	8.014e-51	1.29442e-49	DDIT4
ENSG00000136770	-1.34341	0	0	DNAJC1
ENSG00000130477	-1.79069	2.98712e-275	2.94849e-273	UNC13A
ENSG00000130038	1.34399	3.60215e-14	2.40753e-13	CRACR2A
ENSG00000174808	1.26169	2.52e-08	1.23931e-07	BTC
ENSG00000170091	-1.73109	7.07199e-58	1.26706e-56	HMP19
ENSG00000168003	0.663644	3.05097e-114	1.01322e-112	SLC3A2
ENSG00000168000	0.867771	2.47657e-73	5.47362e-72	BSCL2
ENSG00000169330	1.1464	3.08511e-22	2.72555e-21	KIAA1024
ENSG00000030582	0.675397	4.05564e-42	5.65896e-41	GRN
ENSG00000167910	2.0623	2.34443e-07	1.07928e-06	CYP7A1
ENSG00000268362	0.648894	1.00221e-08	5.08274e-08	CTD-2017D11.1
ENSG00000174788	-1.09802	3.20236e-06	1.35973e-05	PCP2
ENSG00000177103	-2.73624	2.10839e-16	1.53771e-15	DSCAML1
ENSG00000167778	0.985333	1.28873e-52	2.14661e-51	SPRYD3
ENSG00000167775	0.694808	7.05884e-40	9.4416e-39	CD320
ENSG00000167769	1.28871	7.5905e-22	6.63438e-21	ACER1
ENSG00000186007	-1.55375	0.000122854	0.000449491	LEMD1
ENSG00000005379	-0.801656	5.07026e-87	1.29825e-85	BZRAP1
ENSG00000167702	-0.863433	8.23623e-91	2.1932e-89	KIFC2
ENSG00000177606	-0.695472	2.21595e-26	2.237e-25	JUN
ENSG00000167653	1.29462	3.11953e-08	1.52477e-07	PSCA
ENSG00000169862	-2.22788	9.16225e-216	6.4827e-214	CTNND2
ENSG00000167617	1.50719	6.65807e-08	3.17809e-07	CDC42EP5
ENSG00000211455	0.660803	1.39473e-27	1.44681e-26	STK38L
ENSG00000078018	-5.74116	1.80346e-118	6.2353e-117	MAP2
ENSG00000162366	5.72292	2.00151e-106	6.19655e-105	PDZK1IP1
ENSG00000167550	-0.675409	2.3084e-13	1.489e-12	RHEBL1
ENSG00000236283	1.97552	1.70621e-09	9.05241e-09	AC013463.2
ENSG00000167508	0.750921	2.43392e-31	2.75244e-30	MVD
ENSG00000173914	-0.883551	1.30566e-29	1.41691e-28	RBM4B
ENSG00000167264	0.741092	4.49201e-11	2.59312e-10	DUS2
ENSG00000167123	0.638485	2.01369e-25	1.98032e-24	CERCAM
ENSG00000167105	1.71848	7.70841e-10	4.16916e-09	TMEM92
ENSG00000106689	-1.65553	4.83187e-12	2.93e-11	LHX2
ENSG00000177076	-1.60389	1.41105e-44	2.06153e-43	ACER2
ENSG00000167081	-0.685544	2.32732e-17	1.75791e-16	PBX3
ENSG00000167037	1.78395	1.89319e-38	2.46624e-37	SGSM1
ENSG00000167004	0.764623	1.52205e-201	9.85357e-200	PDIA3
ENSG00000088808	0.995033	1.72707e-54	2.95841e-53	PPP1R13B
ENSG00000166961	-1.27758	6.41473e-08	3.06697e-07	MS4A15
ENSG00000166902	0.923723	8.63315e-73	1.89627e-71	MRPL16
ENSG00000166889	0.735408	2.51181e-47	3.83803e-46	PATL1
ENSG00000172201	3.53161	1.7803e-33	2.11186e-32	ID4
ENSG00000166828	-1.58705	1.47495e-08	7.38769e-08	SCNN1G
ENSG00000131236	0.881646	1.22989e-215	8.68283e-214	CAP1
ENSG00000166821	1.1926	6.4085e-70	1.34924e-68	PEX11A
ENSG00000166813	1.20698	2.28705e-14	1.53886e-13	KIF7
ENSG00000108797	-1.64169	2.54563e-62	4.84594e-61	CNTNAP1
ENSG00000101605	-0.654089	0.00016704	0.000601724	MYOM1
ENSG00000166743	-2.00467	3.18538e-17	2.39585e-16	ACSM1
ENSG00000087253	-2.77882	2.29711e-62	4.38329e-61	LPCAT2
ENSG00000152229	-1.3805	6.60551e-116	2.22369e-114	PSTPIP2
ENSG00000166716	0.658047	3.12084e-31	3.52055e-30	ZNF592
ENSG00000172345	-1.98065	6.42057e-45	9.43642e-44	STARD5
ENSG00000243649	0.645352	1.35193e-17	1.03115e-16	CFB
ENSG00000166557	1.31887	4.7588e-291	5.19424e-289	TMED3
ENSG00000166471	0.746389	1.256e-34	1.53548e-33	TMEM41B
ENSG00000166455	-1.04727	0.000103632	0.000382311	C16orf46
ENSG00000166446	-0.757399	4.33929e-136	1.73686e-134	CDYL2
ENSG00000166402	-3.13575	1.84005e-130	6.93129e-129	TUB
ENSG00000166341	-1.4128	9.88085e-05	0.00036536	DCHS1
ENSG00000166206	-5.22061	6.00163e-181	3.39113e-179	GABRB3
ENSG00000166147	-0.732371	2.32673e-07	1.07128e-06	FBN1
ENSG00000131849	-0.755058	8.44259e-05	0.000313993	ZNF132
ENSG00000166130	0.824313	2.47607e-40	3.35824e-39	IKBIP
ENSG00000166104	-1.35073	0.000122247	0.000447372	RP11-299H22.3
ENSG00000166073	-0.606733	2.62702e-23	2.40248e-22	GPR176
ENSG00000183760	-0.983121	1.34413e-09	7.1752e-09	PAPL
ENSG00000165895	1.93313	2.64193e-14	1.77466e-13	ARHGAP42
ENSG00000165863	-1.98966	2.90928e-218	2.08613e-216	C10orf82
ENSG00000155324	0.984228	1.73812e-28	1.83879e-27	GRAMD3
ENSG00000165716	-0.604083	2.55295e-21	2.19833e-20	FAM69B
ENSG00000178127	0.69093	7.15804e-49	1.12437e-47	NDUFV2
ENSG00000112658	0.722427	6.18426e-40	8.2822e-39	SRF
ENSG00000125378	1.31466	1.07564e-63	2.10397e-62	BMP4
ENSG00000165626	1.37168	5.07825e-06	2.11606e-05	BEND7
ENSG00000160360	-1.75218	3.43753e-174	1.84766e-172	GPSM1
ENSG00000112699	1.17904	1.28295e-50	2.06596e-49	GMDS
ENSG00000165929	1.28372	1.0392e-259	9.28342e-258	TC2N
ENSG00000198598	1.98731	1.067e-17	8.16556e-17	MMP17
ENSG00000165548	-1.75791	1.62436e-137	6.62612e-136	TMEM63C
ENSG00000165507	-3.60301	4.8659e-39	6.40924e-38	C10orf10
ENSG00000121851	-0.796385	2.4047e-25	2.35904e-24	POLR3GL
ENSG00000165443	-2.8705	3.7961e-14	2.53451e-13	PHYHIPL
ENSG00000165434	-3.0582	0	0	PGM2L1
ENSG00000184117	-0.862384	1.20626e-131	4.598e-130	NIPSNAP1
ENSG00000113645	-0.627369	5.56451e-52	9.19207e-51	WWC1
ENSG00000165275	-0.737276	3.99888e-45	5.89618e-44	TRMT10B
ENSG00000165238	-1.53051	5.21212e-18	4.03312e-17	WNK2
ENSG00000172318	3.3538	1.25067e-125	4.53489e-124	B3GALT1
ENSG00000170522	1.45657	1.13553e-185	6.71262e-184	ELOVL6
ENSG00000180447	-2.17814	1.72992e-08	8.62282e-08	GAS1
ENSG00000165124	-1.57471	2.23582e-08	1.10413e-07	SVEP1
ENSG00000054793	-0.876586	2.42801e-174	1.30945e-172	ATP9A
ENSG00000165029	-3.55155	4.37558e-97	1.24277e-95	ABCA1
ENSG00000164989	-0.77896	1.84905e-24	1.7631e-23	CCDC171
ENSG00000166908	0.597308	1.10141e-36	1.39447e-35	PIP4K2C
ENSG00000164938	-2.41878	2.29888e-58	4.16546e-57	TP53INP1
ENSG00000105639	0.984716	1.15061e-05	4.65616e-05	JAK3
ENSG00000153208	1.80798	9.36876e-33	1.08993e-31	MERTK
ENSG00000164885	-0.790765	2.93574e-37	3.76455e-36	CDK5
ENSG00000164808	0.874519	1.85192e-83	4.56289e-82	SPIDR
ENSG00000179331	-1.24447	9.0904e-27	9.25271e-26	RAB39A
ENSG00000182568	1.29647	2.55046e-05	9.97873e-05	SATB1
ENSG00000176978	-1.616	0	0	DPP7
ENSG00000164659	-1.53971	9.46367e-99	2.74644e-97	KIAA1324L
ENSG00000237732	-1.75056	1.97778e-09	1.04617e-08	AC010980.2
ENSG00000164591	-2.52474	7.79126e-21	6.59884e-20	MYOZ3
ENSG00000164574	1.21521	2.55891e-185	1.50159e-183	GALNT10
ENSG00000164342	1.4677	2.66528e-07	1.22101e-06	TLR3
ENSG00000166228	1.11437	4.02492e-111	1.2989e-109	PCBD1
ENSG00000164318	-3.14622	5.43229e-21	4.6291e-20	EGFLAM
ENSG00000164306	-0.709716	6.21673e-29	6.62724e-28	PRIMPOL
ENSG00000164414	1.14757	5.90283e-173	3.14107e-171	SLC35A1
ENSG00000115652	1.23959	1.45008e-39	1.92988e-38	UXS1
ENSG00000279877	-0.879246	0.000110521	0.000406461	RP11-420N3.3
ENSG00000164078	1.93564	8.47908e-28	8.85306e-27	MST1R
ENSG00000164010	-0.660262	5.16679e-18	3.99901e-17	ERMAP
ENSG00000138767	-0.870166	2.31731e-73	5.12516e-72	CNOT6L
ENSG00000163931	0.723225	1.80248e-69	3.76029e-68	TKT
ENSG00000227646	2.25646	1.12932e-09	6.05277e-09	STEAP2-AS1
ENSG00000125430	-1.22637	1.99904e-07	9.25869e-07	HS3ST3B1
ENSG00000110446	0.601499	1.79824e-05	7.1405e-05	SLC15A3
ENSG00000163898	2.98318	0	0	LIPH
ENSG00000163882	0.664023	1.97265e-43	2.81263e-42	POLR2H
ENSG00000163874	1.0723	3.41943e-84	8.48384e-83	ZC3H12A
ENSG00000171984	0.646506	0.00024422	0.000861695	C20orf196
ENSG00000135540	1.20496	3.08569e-38	4.00827e-37	NHSL1
ENSG00000170775	-0.803721	2.15779e-24	2.05137e-23	GPR37
ENSG00000153157	-1.97744	5.68164e-10	3.09706e-09	SYCP2L
ENSG00000241361	-0.636275	6.83998e-14	4.52616e-13	SLC25A24P1
ENSG00000163697	-1.82955	0	0	APBB2
ENSG00000163694	0.971254	5.85614e-223	4.29553e-221	RBM47
ENSG00000126821	0.585441	8.30358e-13	5.22544e-12	SGPP1
ENSG00000163683	1.29789	0	0	SMIM14
ENSG00000104140	2.21269	1.04756e-136	4.23004e-135	RHOV
ENSG00000118194	1.75106	2.60627e-11	1.5249e-10	TNNT2
ENSG00000187231	-0.712247	3.56974e-50	5.71105e-49	SESTD1
ENSG00000163623	-3.36783	3.75412e-108	1.18286e-106	NKX6-1
ENSG00000126262	2.38372	0	0	FFAR2
ENSG00000163596	-0.719452	3.37699e-21	2.89647e-20	ICA1L
ENSG00000001626	-0.870223	2.37925e-06	1.02053e-05	CFTR
ENSG00000163545	-0.712751	4.602e-16	3.31853e-15	NUAK2
ENSG00000272913	-2.79307	8.32814e-54	1.41521e-52	RP11-440D17.3
ENSG00000163864	-2.60592	0	0	NMNAT3
ENSG00000163517	-1.01895	6.74761e-60	1.25099e-58	HDAC11
ENSG00000067057	3.32404	1.39395e-139	5.74484e-138	PFKP
ENSG00000163435	1.23553	5.97446e-95	1.65571e-93	ELF3
ENSG00000232810	3.6931	4.51187e-53	7.56656e-52	TNF
ENSG00000143013	-2.06232	3.98855e-254	3.51399e-252	LMO4
ENSG00000196476	-1.29397	2.11083e-23	1.93761e-22	C20orf96
ENSG00000175920	-2.45578	8.52286e-84	2.10479e-82	DOK7
ENSG00000165186	-0.854431	0.000157059	0.000567495	PTCHD1
ENSG00000163347	-1.87175	2.83593e-06	1.21009e-05	CLDN1
ENSG00000163235	-0.937906	9.36314e-27	9.52426e-26	TGFA
ENSG00000257702	-1.58427	1.67233e-13	1.08462e-12	LBX2-AS1
ENSG00000163220	6.07835	4.40642e-129	1.64053e-127	S100A9
ENSG00000267391	1.07333	1.69774e-05	6.7582e-05	RP11-1151B14.3
ENSG00000163171	-1.98826	4.24431e-81	1.02212e-79	CDC42EP3
ENSG00000085552	-2.27075	4.41471e-190	2.66894e-188	IGSF9
ENSG00000277117	1.07947	4.43437e-14	2.95388e-13	CH507-9B2.1
ENSG00000205086	-0.977484	4.22683e-05	0.00016224	C2orf91
ENSG00000163075	-0.710416	2.17451e-05	8.56863e-05	CFAP221
ENSG00000166006	-7.73045	2.52912e-192	1.54653e-190	KCNC2
ENSG00000163016	-1.74628	1.73099e-16	1.26795e-15	ALMS1P
ENSG00000115041	-1.2203	4.91328e-22	4.31917e-21	KCNIP3
ENSG00000162913	-0.792165	2.95484e-05	0.000114948	C1orf145
ENSG00000162894	-1.77639	3.08045e-07	1.40737e-06	FCMR
ENSG00000162892	-1.44735	0.00017037	0.000612821	IL24
ENSG00000135824	2.62537	3.95107e-17	2.96479e-16	RGS8
ENSG00000102265	-3.51325	1.3362e-86	3.40774e-85	TIMP1
ENSG00000162782	-4.28517	5.98652e-36	7.47578e-35	TDRD5
ENSG00000151025	-7.96583	1.62837e-155	7.52555e-154	GPR158
ENSG00000162746	-3.01276	7.95221e-65	1.57669e-63	FCRLB
ENSG00000162745	-5.82548	1.40837e-103	4.25317e-102	OLFML2B
ENSG00000188659	-0.927224	1.85596e-09	9.83357e-09	SAXO2
ENSG00000178409	2.23794	0	0	BEND3
ENSG00000124429	-2.54053	4.69231e-81	1.12916e-79	POF1B
ENSG00000157693	0.750596	1.25333e-45	1.86954e-44	C9orf91
ENSG00000168904	0.591662	5.57603e-20	4.57483e-19	LRRC28
ENSG00000154102	-1.07999	1.15432e-07	5.42168e-07	C16orf74
ENSG00000184160	-3.83215	8.65617e-229	6.71925e-227	ADRA2C
ENSG00000162552	1.49566	4.46099e-61	8.39218e-60	WNT4
ENSG00000114019	-0.663105	1.27953e-27	1.32902e-26	AMOTL2
ENSG00000177628	0.926522	1.20326e-78	2.80886e-77	GBA
ENSG00000170525	-0.732878	2.24744e-14	1.51285e-13	PFKFB3
ENSG00000162434	-0.859502	8.67765e-221	6.30727e-219	JAK1
ENSG00000162426	-1.33873	6.97199e-11	3.98875e-10	SLC45A1
ENSG00000167680	-3.68313	2.96459e-90	7.85506e-89	SEMA6B
ENSG00000162065	-0.611191	1.19501e-26	1.21172e-25	TBC1D24
ENSG00000258199	-0.637169	7.34326e-05	0.00027509	RP11-977G19.5
ENSG00000160963	-3.21878	3.05526e-27	3.14383e-26	COL26A1
ENSG00000161682	-1.35496	7.53716e-39	9.89515e-38	FAM171A2
ENSG00000104365	-0.737196	2.17107e-31	2.46042e-30	IKBKB
ENSG00000161647	-0.728273	2.61953e-30	2.88781e-29	MPP3
ENSG00000177542	0.889429	5.83012e-67	1.18609e-65	SLC25A22
ENSG00000261888	-2.76995	1.60344e-19	1.29526e-18	AC144831.1
ENSG00000177173	-1.83949	7.17089e-23	6.47465e-22	NAP1L4P1
ENSG00000161328	-1.41981	1.96579e-48	3.06673e-47	LRRC56
ENSG00000205838	-1.49702	3.61598e-11	2.09878e-10	TTC23L
ENSG00000261538	2.91371	2.71617e-25	2.66052e-24	RP11-3M1.1
ENSG00000160953	-0.625945	2.75193e-47	4.19892e-46	MUM1
ENSG00000121900	-0.723199	4.1864e-37	5.34472e-36	TMEM54
ENSG00000119965	-0.603819	5.68774e-13	3.60412e-12	C10orf88
ENSG00000082397	2.08965	3.83155e-111	1.23775e-109	EPB41L3
ENSG00000135821	0.75968	2.79652e-128	1.03274e-126	GLUL
ENSG00000160862	8.27883	0	0	AZGP1
ENSG00000160818	0.620716	5.58285e-25	5.41703e-24	GPATCH4
ENSG00000162599	2.59305	5.84656e-182	3.32112e-180	NFIA
ENSG00000160746	0.986989	3.22136e-89	8.43754e-88	ANO10
ENSG00000149115	1.02116	1.41669e-146	6.23206e-145	TNKS1BP1
ENSG00000160716	-1.53738	3.77845e-126	1.37629e-124	CHRNB2
ENSG00000166349	1.36269	4.59442e-05	0.000175653	RAG1
ENSG00000160606	0.842845	2.94075e-21	2.52818e-20	TLCD1
ENSG00000160584	-1.62915	3.52034e-73	7.75372e-72	SIK3
ENSG00000158089	-1.79957	2.07603e-205	1.38032e-203	GALNT14
ENSG00000260766	-0.828843	9.36448e-08	4.42502e-07	RP11-226L15.5
ENSG00000230695	-2.09169	2.07939e-07	9.61415e-07	AC012462.1
ENSG00000157110	0.715201	1.66632e-07	7.75363e-07	RBPMS
ENSG00000160321	0.703852	1.02153e-19	8.28753e-19	ZNF208
ENSG00000166833	0.66303	1.75945e-11	1.03722e-10	NAV2
ENSG00000160318	-1.2377	6.50671e-09	3.34229e-08	CLDND2
ENSG00000003137	-0.726974	2.18079e-15	1.52512e-14	CYP26B1
ENSG00000160285	1.1735	1.96123e-192	1.20157e-190	LSS
ENSG00000167799	-0.777139	2.54844e-19	2.04572e-18	NUDT8
ENSG00000160223	0.618925	7.67037e-14	5.06517e-13	ICOSLG
ENSG00000183336	0.88634	8.25747e-07	3.66221e-06	BOLA2
ENSG00000214216	-2.38549	3.18406e-09	1.66524e-08	IQCJ
ENSG00000160180	4.69686	0	0	TFF3
ENSG00000160094	-0.60798	1.10841e-15	7.84424e-15	ZNF362
ENSG00000186951	-1.11169	7.81871e-78	1.80934e-76	PPARA
ENSG00000160075	-0.839912	1.4122e-72	3.0934e-71	SSU72
ENSG00000160072	0.630015	6.66018e-45	9.78407e-44	ATAD3B
ENSG00000159784	-3.47101	6.97198e-20	5.69675e-19	FAM131B
ENSG00000159409	-4.6677	2.19392e-114	7.29352e-113	CELF3
ENSG00000159388	-0.792239	5.58668e-35	6.87447e-34	BTG2
ENSG00000132561	1.38205	4.82131e-187	2.86599e-185	MATN2
ENSG00000165533	-1.2766	3.69235e-145	1.61098e-143	TTC8
ENSG00000159239	-1.1976	3.22229e-20	2.6732e-19	C2orf81
ENSG00000159200	2.68977	0	0	RCAN1
ENSG00000159167	-3.14556	3.06635e-151	1.38314e-149	STC1
ENSG00000262814	0.656918	7.02431e-13	4.43523e-12	MRPL12
ENSG00000158859	-0.677442	2.10478e-07	9.72731e-07	ADAMTS4
ENSG00000158813	-1.15862	1.45664e-26	1.47513e-25	EDA
ENSG00000166128	0.860049	2.12408e-17	1.6063e-16	RAB8B
ENSG00000261501	0.839179	5.06877e-10	2.77386e-09	RP11-63B13.1
ENSG00000075223	2.1102	0	0	SEMA3C
ENSG00000256304	0.760704	1.80607e-09	9.57082e-09	CCDC150P1
ENSG00000182492	-3.266	8.42535e-21	7.13022e-20	BGN
ENSG00000158296	0.822355	8.12491e-05	0.000302706	SLC13A3
ENSG00000186260	-0.934182	5.65435e-95	1.56836e-93	MKL2
ENSG00000223969	2.66875	1.22246e-19	9.89759e-19	AC002456.2
ENSG00000158050	-3.51051	2.73943e-159	1.296e-157	DUSP2
ENSG00000168546	-1.99581	3.57789e-23	3.26275e-22	GFRA2
ENSG00000157927	-1.90473	1.35686e-43	1.94242e-42	RADIL
ENSG00000174307	-0.590208	7.52166e-13	4.74458e-12	PHLDA3
ENSG00000109472	4.03263	0	0	CPE
ENSG00000249430	-3.33347	6.42504e-17	4.78415e-16	CTD-2231H16.1
ENSG00000157617	-1.54995	2.80626e-06	1.19806e-05	C2CD2
ENSG00000158286	-0.851897	2.70418e-08	1.32744e-07	RNF207
ENSG00000157483	1.74324	0	0	MYO1E
ENSG00000175197	0.841094	5.44607e-26	5.41913e-25	DDIT3
ENSG00000244701	0.791455	4.42889e-07	1.9973e-06	RP5-894A10.2
ENSG00000157181	0.677249	1.8475e-73	4.09175e-72	C1orf27
ENSG00000177182	1.00698	4.88751e-06	2.03897e-05	CLVS1
ENSG00000157107	0.870422	6.99867e-77	1.60794e-75	FCHO2
ENSG00000272502	1.92543	7.71514e-07	3.42834e-06	RP11-713M15.2
ENSG00000125089	1.32439	1.51583e-184	8.79814e-183	SH3TC1
ENSG00000156804	-3.52136	5.84543e-289	6.27325e-287	FBXO32
ENSG00000152127	-0.767302	6.67242e-95	1.84754e-93	MGAT5
ENSG00000156709	0.804519	9.51524e-46	1.42333e-44	AIFM1
ENSG00000105329	-2.64814	9.85877e-50	1.56551e-48	TGFB1
ENSG00000257767	0.868346	7.1933e-05	0.000269789	RP11-162P23.2
ENSG00000156587	-0.729163	3.55429e-45	5.24549e-44	UBE2L6
ENSG00000156535	-0.805527	4.84649e-16	3.48932e-15	CD109
ENSG00000261963	-2.52545	1.54873e-11	9.15867e-11	RP11-74E22.4
ENSG00000155961	-1.46977	7.56532e-95	2.09296e-93	RAB39B
ENSG00000277186	-1.96312	2.69149e-08	1.32141e-07	RP13-554M15.8
ENSG00000156453	-1.69504	7.28121e-266	6.65316e-264	PCDH1
ENSG00000177398	-0.753785	0.000220838	0.000783603	UMODL1
ENSG00000156299	-1.31942	2.50582e-272	2.41382e-270	TIAM1
ENSG00000156284	-1.50678	1.21429e-13	7.92406e-13	CLDN8
ENSG00000179388	-2.85764	3.28269e-50	5.25443e-49	EGR3
ENSG00000128011	-1.92792	1.08035e-19	8.76034e-19	LRFN1
ENSG00000161955	-0.620347	5.55153e-06	2.30546e-05	TNFSF13
ENSG00000156103	-7.52422	0	0	MMP16
ENSG00000156096	5.87934	0	0	UGT2B4
ENSG00000269929	0.601223	1.88482e-05	7.46759e-05	RP11-2B6.2
ENSG00000144893	-1.73043	1.50881e-44	2.20234e-43	MED12L
ENSG00000155980	-2.77672	2.16722e-60	4.04848e-59	KIF5A
ENSG00000171365	0.928059	5.43698e-21	4.63186e-20	CLCN5
ENSG00000174928	0.723661	6.05899e-19	4.81184e-18	C3orf33
ENSG00000135480	0.91798	4.6131e-130	1.73363e-128	KRT7
ENSG00000165424	-0.980613	1.24017e-11	7.37622e-11	ZCCHC24
ENSG00000155849	3.16119	2.99328e-81	7.21931e-80	ELMO1
ENSG00000155660	0.628187	4.43857e-93	1.20603e-91	PDIA4
ENSG00000140548	0.671827	3.27428e-31	3.69104e-30	ZNF710
ENSG00000266983	-1.19571	3.69718e-06	1.55947e-05	CTC-232P5.1
ENSG00000168386	1.47917	3.54076e-12	2.1639e-11	FILIP1L
ENSG00000155158	1.91126	2.66396e-233	2.16234e-231	TTC39B
[truncated: 3,704 more rows]

## Sheet: SUM44 LTED-A DE genes
	log2FoldChange	p-value	adjusted p-value	gene_symbol
[truncated: 5,292 more rows]

[truncated: 5 more sheets: SUM44 LTED-B DE genes, Common MM134 LTED DE genes, Common SUM44 LTED DE genes, Common MM134 and SUM44 DE genes, SUM44 TamR DE genes]
