# Supplementary material for: Key regulators of lipid metabolism drive endocrine resistance in invasive lobular breast cancer
Source: Breast Cancer Res. 2018 Sep 4;20:106. doi: 10.1186/s13058-018-1041-8 (PMC6124012; doi:10.1186/s13058-018-1041-8)
Supplement: Supplementary file 5 — Table S4. Differentially regulated pathways in MM134 and SUM44 long-term estrogen deprivation (LTED) cells. (XLSX 135 kb) [file 13058_2018_1041_MOESM5_ESM.xlsx]

## Sheet: Reactome cholesterol synthesis
REACTOME_CHOLESTEROL_BIOSYNTHESIS	E2F_activation_signature
> Genes involved in Cholesterol biosynthesis	>E2F activation signature from Miller et al. Cancer discovery 2011
CYP51A1	ARHGAP11A
DHCR24	ATAD2
DHCR7	MCMBP
EBP	CASP8AP2
FDFT1	CLSPN
FDPS	DCK
GGPS1	DNAJC9
HMGCR	FANCD2
HMGCS1	FBXO5
HSD17B7	FKBP5
IDI1	H2AFZ
IDI2	KIAA0101
LBR	KPNB1
LOC651621	NUP62
LOC730412	RANBP1
LSS	RET
MSMO1	SRSF1
MVD	TRA2B
MVK	SRSF7
NSDHL	SNRPD1
PMVK	STMN1
SC5DL	TMPO
SQLE	TREX2
TM7SF2	ZNF367

## Sheet: MM134 LTED upregulated pathway
Ingenuity Canonical Pathways	-log(p-value)	-log(B-H p-value)	Ratio	z-score	Molecules
Antigen Presentation Pathway	10.7	7.97	0.459	NaN	PDIA3,CIITA,HLA-DQA1,PSMB8,CD74,TAP1,MR1,HLA-DRB1,HLA-DMA,HLA-DRA,HLA-DMB,HLA-DQA2,HLA-DPB1,TAP2,HLA-DPA1,HLA-E,HLA-DRB5
Ketogenesis	4.95	2.54	0.6	NaN	BDH1,HADHB,ACAT1,HMGCL,HMGCS2,HMGCS1
T Helper Cell Differentiation	4.47	2.23	0.211	NaN	IL4R,TGFBR1,TNFRSF1A,HLA-DQA1,IFNGR1,HLA-DQB1,STAT3,HLA-DRB1,HLA-DMA,HLA-DMB,HLA-DRA,TNF,ICOSLG/LOC102723996,HLA-DRB5,TNFRSF11B
STAT3 Pathway	4.32	2.21	0.205	NaN	SRC,MAP3K9,TGFBR1,RRAS,SOCS6,BMPR1B,STAT3,TNFRSF11A,NDUFA13,FGFR3,RRAS2,MAPK3,FGFR4,CISH,INSR
LXR/RXR Activation	4.1	2.09	0.165	NaN	SCD,C3,TNFRSF1A,AMBP,SAA2,IL1R2,ALB,LYZ,LDLR,ORM1,SREBF1,FASN,SAA1,ORM2,SERPINA1,S100A8,TNF,CYP51A1,APOD,TNFRSF11B
Xenobiotic Metabolism Signaling	3.77	1.9	0.122	NaN	SULT1C4,UGT2B7,NQO2,ABCC2,UGT2B15,FGFR3,HSP90B1,CES1,CAMK2D,FGFR4,MAPK3,NR1I3,SULT1A3/SULT1A4,CHST3,UGT2B11,PRKD3,AHR,ALDH6A1,PRKCA,GSTA3,MAP3K9,GSTA2,UGT2B4,SULT1C2,RRAS,NQO1,GRIP1,UGT2B10,CHST1,RRAS2,SMOX,CAT,MAP3K8,ABCC3,TNF
Calcium-induced T Lymphocyte Apoptosis	3.77	1.9	0.203	NaN	CALML5,HLA-DRB1,HLA-DMA,CD4,HLA-DMB,HLA-DRA,HLA-DQA1,CAPN2,HLA-DQB1,PRKD3,HLA-DRB5,ORAI1,PRKCA
Superpathway of Cholesterol Biosynthesis	3.57	1.77	0.286	NaN	SQLE,DHCR7,HADHB,ACAT1,MSMO1,HMGCS2,HMGCS1,CYP51A1
Hepatic Cholestasis	3.3	1.54	0.138	NaN	PRKACB,ADCY2,TNFRSF1A,ADCY4,ABCC2,HNF1A,HSD3B7,ATP8B1,IL1R2,NFKBIA,SLCO3A1,SREBF1,FGFR4,ADCY1,PRKAR1B,INSR,ABCC3,TNF,PRKD3,IRAK2,PRKCA,TNFRSF11B
Regulation of Cellular Mechanics by Calpain Protease	3.08	1.41	0.193	NaN	CAPN8,SRC,CCNE1,RRAS2,RRAS,MAPK3,EZR,CDK6,CAPN2,CNGA1,CNGA3
B Cell Development	3.05	1.41	0.242	NaN	HLA-DRB1,HLA-DMA,HLA-DRA,HLA-DMB,HLA-DQA1,HLA-DQB1,IL7,HLA-DRB5
cAMP-mediated signaling	3.04	1.41	0.122	NaN	PRKACB,ADCY4,AKAP9,HTR1D,CHRM1,CAMK2D,PDE3B,MAPK3,PRKAR1B,SMPDL3A,SRC,ADCY2,RGS2,CALML5,RAPGEF3,STAT3,CNGA1,CNGA3,PDE8A,S1PR3,VIPR1,RAP1GAP,PKIB,ADCY1,PDE5A,DUSP4,GNAL
FXR/RXR Activation	2.97	1.41	0.143	NaN	UGT2B4,C3,SDC1,ABCC2,AMBP,SAA2,HNF1A,ALB,ORM1,SREBF1,FGFR4,FASN,SAA1,ORM2,SERPINA1,FOXA3,TNF,APOD
Acute Phase Response Signaling	2.94	1.41	0.13	NaN	C3,RRAS,TNFRSF1A,AMBP,SOCS6,SERPINA3,SAA2,STAT3,HNF1A,C5,ALB,RRAS2,NFKBIA,ITIH2,ORM1,MAPK3,SAA1,CFB,ORM2,SERPINA1,TNF,TNFRSF11B
Colanic Acid Building Blocks Biosynthesis	2.89	1.41	0.357	NaN	TSTA3,UGDH,GMDS,PMM1,PMM2
Production of Nitric Oxide and Reactive Oxygen Species in Macrophages	2.87	1.41	0.124	NaN	MAP3K9,PPP1R14C,TNFRSF1A,IFNGR1,FGFR3,ALB,RHOV,LYZ,NFKBIA,ORM1,MAPK3,FGFR4,CAT,ORM2,SERPINA1,MAP3K8,S100A8,TNF,PRKD3,FNBP1,SIRPA,PRKCA,APOD,TNFRSF11B
Aryl Hydrocarbon Receptor Signaling	2.83	1.41	0.136	NaN	GSTA3,SRC,GSTA2,TFF1,NQO2,NQO1,CDK6,SLC35A2,CTSD,CCNE1,NCOA7,HSP90B1,NCOA2,MAPK3,NFIA,HSPB7,TNF,ALDH6A1,AHR
PKCθ Signaling in T Lymphocytes	2.81	1.41	0.138	NaN	MAP3K9,RRAS,CD4,HLA-DQA1,HLA-DQB1,MALT1,FGFR3,RRAS2,CAMK2D,NFKBIA,HLA-DRB1,HLA-DMA,MAPK3,FGFR4,HLA-DMB,HLA-DRA,MAP3K8,HLA-DRB5
Tryptophan Degradation III (Eukaryotic)	2.8	1.41	0.286	NaN	KMO,TDO2,HADHB,ACAT1,KYNU,HSD17B8
Endoplasmic Reticulum Stress Pathway	2.8	1.41	0.286	NaN	HSP90B1,DDIT3,ERN1,XBP1,DNAJC3,HSPA5
Type I Diabetes Mellitus Signaling	2.78	1.41	0.145	NaN	ICA1,TNFRSF1A,SOCS6,HLA-DQA1,IFNGR1,HLA-DQB1,NFKBIA,HLA-DRB1,HLA-DMA,HLA-DMB,HLA-DRA,TNF,CPE,HLA-E,HLA-DRB5,TNFRSF11B
Caveolar-mediated Endocytosis Signaling	2.77	1.41	0.169	NaN	ITGB2,SRC,ALB,RAB5C,ITGAM,ITGA9,FLOT1,ITGB4,INSR,ITGAL,DYRK3,PRKCA
Clathrin-mediated Endocytosis Signaling	2.75	1.4	0.122	NaN	MYO6,SRC,RAB5C,USP9X,WASL,SH3GL2,PDGFC,FGFR3,ITGB2,ALB,LYZ,CD2AP,LDLR,ORM1,FGFR4,AMPH,TFRC,ORM2,SERPINA1,S100A8,ITGB4,MYO1E,APOD,HIP1R
G-Protein Coupled Receptor Signaling	2.65	1.32	0.111	NaN	PRKACB,ADCY4,HTR1D,CHRM1,FGFR3,NFKBIA,CAMK2D,PDE3B,FGFR4,MAPK3,PRKAR1B,PRKCA,SMPDL3A,SRC,RGS2,ADCY2,RRAS,RAPGEF3,STAT3,PDE8A,S1PR3,RRAS2,VIPR1,RAP1GAP,ADCY1,CALCR,PDE5A,MAP3K8,DUSP4,GNAL
Graft-versus-Host Disease Signaling	2.52	1.21	0.188	NaN	HLA-DRB1,HLA-DMA,HLA-DRA,HLA-DMB,HLA-DQA1,HLA-DQB1,TNF,HLA-DRB5,HLA-E
IL-4 Signaling	2.47	1.18	0.149	NaN	IL4R,RRAS,HLA-DQA1,HLA-DQB1,FGFR3,RRAS2,HLA-DRB1,HLA-DMA,FGFR4,HLA-DRA,HLA-DMB,RPS6KB2,HLA-DRB5
Germ Cell-Sertoli Cell Junction Signaling	2.46	1.18	0.121	NaN	SRC,MAP3K9,TGFBR1,RRAS,TJP1,TNFRSF1A,WASL,TUBB2A,TUBA4A,GSN,BCAR1,FGFR3,RHOV,RRAS2,MAPK3,FGFR4,MAP3K8,TNF,FNBP1,RAB8B,CTNND1
UDP-N-acetyl-D-galactosamine Biosynthesis II	2.42	1.18	0.364	NaN	HK2,PGM3,GNPDA2,UAP1
Gαs Signaling	2.41	1.18	0.138	NaN	PRKACB,SRC,RGS2,ADCY2,ADCY4,RYR2,RAPGEF3,CHRM1,CNGA1,CNGA3,RAPGEF2,VIPR1,MAPK3,ADCY1,PRKAR1B
UDP-D-xylose and UDP-D-glucuronate Biosynthesis	2.39	1.18	1	NaN	UXS1,UGDH
GDP-L-fucose Biosynthesis I (from GDP-D-mannose)	2.39	1.18	1	NaN	TSTA3,GMDS
OX40 Signaling Pathway	2.38	1.18	0.146	NaN	HLA-DRB1,NFKBIA,HLA-DMA,CD4,HLA-DMB,HLA-DRA,HLA-DQA1,HLA-DQB1,HLA-DQA2,HLA-DPB1,HLA-DPA1,HLA-DRB5,HLA-E
ERK/MAPK Signaling	2.37	1.18	0.116	NaN	PRKACB,SRC,MYCN,PPP1R14C,RRAS,RAPGEF3,STAT3,BCAR1,PLA2G2A,EIF4EBP1,KSR1,FGFR3,PLA2G4E,RRAS2,ELF3,ETS2,MAPK3,FGFR4,PRKAR1B,DUSP4,HSPB7,PLA2G4F,PRKCA
Role of Macrophages, Fibroblasts and Endothelial Cells in Rheumatoid Arthritis	2.31	1.13	0.104	NaN	PDIA3,FZD3,CEBPD,HNF1A,PDGFC,ROCK2,IL1R2,FGFR3,NFKBIA,CAMK2D,FGFR4,MAPK3,LTBR,MAPKAPK2,PRKD3,PRKCA,TNFRSF11B,SRC,CALML5,LRP5,RRAS,TNFRSF1A,IL15,STAT3,IL7,C5,FZD8,RRAS2,TLR5,CSF1,TNF,IRAK2
Macropinocytosis Signaling	2.29	1.12	0.148	NaN	FGFR3,ITGB2,SRC,RRAS2,RRAS,CSF1,FGFR4,USP6NL,ITGB4,PDGFC,PRKD3,PRKCA
Nitric Oxide Signaling in the Cardiovascular System	2.26	1.1	0.133	NaN	PRKACB,CALML5,GUCY2D,RYR2,PDGFC,CHRM1,FGFR3,HSP90B1,PDE3B,MAPK3,FGFR4,PRKAR1B,PDE5A,PRKD3,PRKCA
NRF2-mediated Oxidative Stress Response	2.22	1.08	0.114	NaN	GSTA3,AKR7A3,GSTA2,RRAS,PPIB,PRDX1,ABCC2,NQO2,NQO1,SLC35A2,DNAJC3,MAFF,FGFR3,RRAS2,MAPK3,FGFR4,GPX2,CAT,SQSTM1,FKBP5,PRKD3,PRKCA
Unfolded protein response	2.17	1.07	0.167	NaN	HSP90B1,DDIT3,ERN1,SREBF1,XBP1,CEBPD,DNAJC3,HSPA5,HSPA2
Allograft Rejection Signaling	2.16	1.07	0.143	NaN	HLA-DRB1,HLA-DMA,HLA-DRA,HLA-DMB,HLA-DQA1,HLA-DQB1,HLA-DQA2,TNF,HLA-DPB1,HLA-DPA1,HLA-DRB5,HLA-E
Serotonin Degradation	2.15	1.07	0.149	NaN	ALDH2,SULT1C4,UGT2B4,SULT1C2,UGT2B7,DHRS9,SMOX,SULT1A3/SULT1A4,PECR,UGT2B10,UGT2B15
Melanocyte Development and Pigmentation Signaling	2.14	1.07	0.137	NaN	PRKACB,SRC,ADCY2,MITF,RRAS,ADCY4,FGFR3,RRAS2,MAPK3,FGFR4,ADCY1,RPS6KB2,PRKAR1B
Cholesterol Biosynthesis I	2.13	1.07	0.308	NaN	SQLE,DHCR7,MSMO1,CYP51A1
Mevalonate Pathway I	2.13	1.07	0.308	NaN	HADHB,ACAT1,HMGCS2,HMGCS1
Cholesterol Biosynthesis II (via 24,25-dihydrolanosterol)	2.13	1.07	0.308	NaN	SQLE,DHCR7,MSMO1,CYP51A1
Cholesterol Biosynthesis III (via Desmosterol)	2.13	1.07	0.308	NaN	SQLE,DHCR7,MSMO1,CYP51A1
PXR/RXR Activation	2.1	1.06	0.154	NaN	PRKACB,GSTA2,SCD,ABCC2,NR1I3,PRKAR1B,INSR,ABCC3,HMGCS2,TNF
NF-κB Activation by Viruses	2.08	1.04	0.14	NaN	FGFR3,ITGB2,CCR5,NFKBIA,RRAS2,RRAS,MAPK3,FGFR4,CD4,PRKD3,ITGAL,PRKCA
α-Adrenergic Signaling	2.04	1.02	0.138	NaN	PRKACB,ADCY2,CALML5,RRAS2,RRAS,MAPK3,ADCY4,ADCY1,PRKAR1B,PYGB,PRKD3,PRKCA
Autoimmune Thyroid Disease Signaling	2.04	1.02	0.17	NaN	HLA-DRB1,HLA-DMA,HLA-DRA,HLA-DMB,HLA-DQA1,HLA-DQB1,HLA-DRB5,HLA-E
iCOS-iCOSL Signaling in T Helper Cells	2.02	1.01	0.125	NaN	CALML5,CD4,HLA-DQA1,HLA-DQB1,FGFR3,CAMK2D,NFKBIA,HLA-DRB1,HLA-DMA,FGFR4,HLA-DMB,HLA-DRA,PLEKHA1,ICOSLG/LOC102723996,HLA-DRB5
Tryptophan Degradation to 2-amino-3-carboxymuconate Semialdehyde	1.94	0.944	0.375	NaN	KMO,TDO2,KYNU
D-glucuronate Degradation I	1.93	0.944	0.667	NaN	DCXR,CRYL1
Thiosulfate Disproportionation III (Rhodanese)	1.93	0.944	0.667	NaN	MPST,TST
Thyroid Hormone Metabolism II (via Conjugation and/or Degradation)	1.91	0.926	0.175	NaN	SULT1C4,UGT2B4,SULT1C2,UGT2B7,SULT1A3/SULT1A4,UGT2B10,UGT2B15
Sperm Motility	1.87	0.895	0.12	NaN	PRKACB,CALML5,PDIA3,SLC12A2,CNGA1,PLA2G2A,CNGA3,PLA2G4E,NPR1,PTK6,PRKAR1B,PLA2G4F,PNPLA3,PRKD3,PRKCA
Amyloid Processing	1.83	0.875	0.157	NaN	PRKACB,CAPN8,MAPK3,PRKAR1B,MARK1,BACE1,CAPN2,APP
Ceramide Signaling	1.82	0.875	0.129	NaN	S1PR3,FGFR3,CTSD,RRAS2,RRAS,TNFRSF1A,MAPK3,FGFR4,NSMAF,TNF,KSR1,TNFRSF11B
Leukocyte Extravasation Signaling	1.81	0.875	0.105	NaN	TIMP3,SRC,CD99,WASL,RDX,RAPGEF3,CLDN7,BCAR1,ITGAL,ROCK2,FGFR3,ITGB2,ITGAM,RAP1GAP,FGFR4,EZR,PECAM1,PRKD3,CLDN3,MMP17,PRKCA,CTNND1
Colorectal Cancer Metastasis Signaling	1.81	0.875	0.101	NaN	PRKACB,TGFBR1,FZD3,ADCY4,PDGFC,HNF1A,FGFR3,FGFR4,MAPK3,PRKAR1B,MMP17,SRC,ADCY2,LRP5,RRAS,TNFRSF1A,IFNGR1,STAT3,FZD8,RHOV,RRAS2,TLR5,ADCY1,TNF,FNBP1
Atherosclerosis Signaling	1.81	0.875	0.118	NaN	PDGFC,PLA2G2A,PLA2G4E,ITGB2,ALB,LYZ,ORM1,CSF1,ORM2,SERPINA1,S100A8,PLA2G4F,PNPLA3,TNF,APOD
Ketolysis	1.79	0.861	0.333	NaN	BDH1,HADHB,ACAT1
MIF-mediated Glucocorticoid Regulation	1.77	0.855	0.182	NaN	PLA2G4E,NFKBIA,MAPK3,PLA2G4F,CD74,PLA2G2A
CXCR4 Signaling	1.73	0.83	0.109	NaN	SRC,ADCY2,RRAS,ADCY4,CD4,BCAR1,FGFR3,ROCK2,RHOV,RRAS2,MAPK3,FGFR4,ADCY1,ELMO1,PRKD3,FNBP1,GNAL,PRKCA
Leptin Signaling in Obesity	1.72	0.83	0.129	NaN	PRKACB,FGFR3,ADCY2,PDIA3,PDE3B,MAPK3,FGFR4,ADCY4,ADCY1,PRKAR1B,STAT3
Superpathway of D-myo-inositol (1,4,5)-trisphosphate Metabolism	1.72	0.83	0.2	NaN	MINPP1,IMPAD1,ITPKB,ITPKC,IMPA2
Oncostatin M Signaling	1.71	0.83	0.176	NaN	TIMP3,EPAS1,RRAS2,RRAS,MAPK3,STAT3
PPARα/RXRα Activation	1.71	0.83	0.107	NaN	PRKACB,ADCY2,TGFBR1,RRAS,PDIA3,ADCY4,BCL3,IL1R2,HSP90B1,RRAS2,NFKBIA,MAPK3,FASN,ADCY1,PRKAR1B,PRKAA2,INSR,ACVR1C,PRKCA
Superpathway of Geranylgeranyldiphosphate Biosynthesis I (via Mevalonate)	1.7	0.83	0.235	NaN	HADHB,ACAT1,HMGCS2,HMGCS1
eNOS Signaling	1.69	0.83	0.11	NaN	PRKACB,ADCY2,CALML5,ADCY4,HSPA5,CNGA1,HSPA2,PDGFC,CNGA3,FGFR3,HSP90B1,FGFR4,ADCY1,PRKAR1B,PRKAA2,PRKD3,PRKCA
Renin-Angiotensin Signaling	1.68	0.83	0.117	NaN	PRKACB,ADCY2,RRAS,ADCY4,STAT3,FGFR3,RRAS2,MAPK3,FGFR4,ADCY1,PRKAR1B,PRKD3,TNF,PRKCA
NF-κB Signaling	1.67	0.83	0.106	NaN	PRKACB,TGFBR1,BMP4,RRAS,TNFRSF1A,BMPR1B,MALT1,TNFRSF11A,FGFR3,IL1R2,RRAS2,NFKBIA,TLR5,FGFR4,MAP3K8,LTBR,INSR,TNF,TNFRSF11B
Gap Junction Signaling	1.66	0.83	0.107	NaN	PRKACB,SRC,ADCY2,RRAS,PDIA3,GUCY2D,ADCY4,TUBB2A,TUBA4A,FGFR3,RRAS2,MAPK3,FGFR4,NPR1,ADCY1,PRKAR1B,PRKD3,PRKCA
BMP signaling pathway	1.65	0.83	0.132	NaN	PRKACB,MAGED1,BMP4,RRAS2,RRAS,MAPK3,PRKAR1B,SMAD6,BMPR1B,CHRD
Spermine and Spermidine Degradation I	1.65	0.83	0.5	NaN	SMOX,SAT1
Methylmalonyl Pathway	1.65	0.83	0.5	NaN	PCCA,MUT
Glutathione Redox Reactions II	1.65	0.83	0.5	NaN	PDIA3,GLRX
Myo-inositol Biosynthesis	1.65	0.83	0.5	NaN	IMPAD1,IMPA2
Integrin Signaling	1.62	0.83	0.1	NaN	SRC,ARHGAP26,RRAS,WASL,MYLK,BCAR3,GSN,BCAR1,ITGAL,FGFR3,ITGB2,CAPN8,RHOV,ITGAM,RRAS2,ITGA9,MAPK3,FGFR4,CAPN2,ITGB4,NEDD9,FNBP1
CDK5 Signaling	1.62	0.83	0.121	NaN	PRKACB,PPP1R14C,ADCY2,RRAS2,RRAS,BDNF,MAPK3,ADCY4,ADCY1,PRKAR1B,LAMB1,GNAL
Adipogenesis pathway	1.62	0.83	0.112	NaN	BMP4,DDIT3,FZD3,TNFRSF1A,CEBPD,XBP1,BSCL2,FGFR3,FZD8,KAT2B,SREBF1,FGFR4,KLF3,SOX9,TNF
G Beta Gamma Signaling	1.62	0.83	0.125	NaN	PRKACB,SRC,ADCY2,RRAS2,RRAS,MAPK3,ADCY1,PRKAR1B,PRKD3,GNAL,PRKCA
Altered T Cell and B Cell Signaling in Rheumatoid Arthritis	1.62	0.83	0.125	NaN	HLA-DRB1,TLR5,CSF1,HLA-DMA,HLA-DRA,HLA-DMB,IL15,HLA-DQA1,HLA-DQB1,TNF,HLA-DRB5
VEGF Family Ligand-Receptor Interactions	1.62	0.83	0.125	NaN	FGFR3,PLA2G4E,RRAS2,RRAS,MAPK3,FGFR4,PLA2G4F,PRKD3,PLA2G2A,NRP1,PRKCA
IL-12 Signaling and Production in Macrophages	1.61	0.83	0.11	NaN	IFNGR1,FGFR3,ALB,LYZ,ORM1,MAPK3,FGFR4,ORM2,SERPINA1,S100A8,MAP3K8,REL,PRKD3,TNF,APOD,PRKCA
Valine Degradation I	1.61	0.83	0.222	NaN	BCAT2,HIBADH,HADHB,ALDH6A1
Corticotropin Releasing Hormone Signaling	1.61	0.83	0.117	NaN	PRKACB,CALML5,ADCY2,GUCY2D,BDNF,ADCY4,PTCH1,MAPK3,NPR1,ADCY1,PRKAR1B,PRKD3,PRKCA
Superpathway of Melatonin Degradation	1.58	0.817	0.134	NaN	SULT1C4,UGT2B4,SULT1C2,UGT2B7,SMOX,SULT1A3/SULT1A4,UGT2B10,CYP51A1,UGT2B15
Apoptosis Signaling	1.58	0.817	0.124	NaN	GAS2,CAPN8,NFKBIA,RRAS2,RRAS,TNFRSF1A,MAPK3,CAPN2,TNF,AIFM1,PRKCA
VDR/RXR Activation	1.58	0.817	0.128	NaN	LRP5,NCOA2,TRPV6,MXD1,IGFBP3,HES1,KLF4,PRKD3,HSD17B2,PRKCA
Nur77 Signaling in T Lymphocytes	1.56	0.801	0.14	NaN	CALML5,HLA-DRB1,HLA-DMA,HLA-DRA,HLA-DMB,HLA-DQA1,HLA-DQB1,HLA-DRB5
Role of Pattern Recognition Receptors in Recognition of Bacteria and Viruses	1.54	0.788	0.109	NaN	C3,OAS2,OAS3,RNASEL,C5,FGFR3,IFIH1,NOD2,TLR5,MAPK3,FGFR4,PRKD3,TNF,RIPK2,PRKCA
Relaxin Signaling	1.52	0.77	0.107	NaN	SMPDL3A,PRKACB,ADCY2,GUCY2D,ADCY4,FGFR3,PDE8A,NFKBIA,PDE3B,MAPK3,FGFR4,NPR1,ADCY1,PRKAR1B,PDE5A,GNAL
Factors Promoting Cardiogenesis in Vertebrates	1.49	0.746	0.12	NaN	FZD8,CCNE1,LRP5,TGFBR1,BMP4,FZD3,BMPR1B,HNF1A,PRKD3,ACVR1C,PRKCA
Granulocyte Adhesion and Diapedesis	1.46	0.733	0.102	NaN	CD99,SELL,SDC1,TNFRSF1A,RDX,CLDN7,ITGAL,C5,IL1R2,ITGB2,ITGAM,EZR,PECAM1,TNF,CX3CL1,CLDN3,MMP17,TNFRSF11B
PPAR Signaling	1.46	0.733	0.118	NaN	IL1R2,HSP90B1,NFKBIA,RRAS2,RRAS,TNFRSF1A,MAPK3,INSR,PDGFC,TNF,TNFRSF11B
CMP-N-acetylneuraminate Biosynthesis I (Eukaryotes)	1.45	0.733	0.4	NaN	GNE,NANS
2-oxobutanoate Degradation I	1.45	0.733	0.4	NaN	PCCA,MUT
p38 MAPK Signaling	1.44	0.733	0.111	NaN	TGFBR1,DDIT3,TNFRSF1A,PLA2G2A,CDC25B,IL1R2,PLA2G4E,RPS6KB2,PLA2G4F,HSPB7,MAPKAPK2,TNF,IRAK2
GNRH Signaling	1.44	0.733	0.109	NaN	PRKACB,SRC,MAP3K9,ADCY2,RRAS,ADCY4,RRAS2,CAMK2D,MAPK3,ADCY1,PRKAR1B,MAP3K8,PRKD3,PRKCA
Role of JAK1 and JAK3 in γc Cytokine Signaling	1.44	0.733	0.127	NaN	FGFR3,IL4R,RRAS2,RRAS,MAPK3,FGFR4,IL15,STAT3,IL7
Chemokine Signaling	1.44	0.733	0.127	NaN	ROCK2,SRC,CALML5,CCR5,CAMK2D,RRAS2,RRAS,MAPK3,PRKCA
Hematopoiesis from Multipotent Stem Cells	1.43	0.732	0.25	NaN	CSF1,IL15,IL7
Glutaryl-CoA Degradation	1.43	0.732	0.25	NaN	HADHB,ACAT1,HSD17B8
IGF-1 Signaling	1.42	0.727	0.113	NaN	PRKACB,FGFR3,IGFBP4,RRAS2,RRAS,MAPK3,FGFR4,SOCS6,PRKAR1B,IGFBP3,RPS6KB2,STAT3
Cdc42 Signaling	1.41	0.723	0.102	NaN	SRC,CDC42EP5,WASL,HLA-DQA1,MYLK,HLA-DQB1,CDC42BPA,DIAPH1,HLA-DRB1,HLA-DMA,HLA-DMB,HLA-DRA,HLA-DQA2,HLA-DPB1,HLA-DPA1,HLA-DRB5,HLA-E
Role of MAPK Signaling in the Pathogenesis of Influenza	1.41	0.72	0.125	NaN	PLA2G4E,RRAS2,RRAS,MAPK3,PLA2G4F,PNPLA3,TNF,PLA2G2A,PRKCA
Protein Kinase A Signaling	1.39	0.706	0.0872	NaN	PRKACB,TGFBR1,PDIA3,ADCY4,AKAP9,DUSP22,MYLK,HNF1A,CDC25B,ROCK2,NFKBIA,CAMK2D,DUSP3,PDE3B,MAPK3,PRKAR1B,PRKD3,PRKCA,SMPDL3A,PPP1R14C,PTPRE,ADCY2,CALML5,RYR2,PTCH1,PYGB,CNGA1,CNGA3,PDE8A,ADCY1,PDE5A,DUSP4,SIRPA,DUSP16
Melatonin Degradation I	1.37	0.701	0.129	NaN	SULT1C4,UGT2B4,SULT1C2,UGT2B7,SULT1A3/SULT1A4,UGT2B10,CYP51A1,UGT2B15
Synaptic Long Term Potentiation	1.37	0.701	0.108	NaN	PRKACB,PPP1R14C,CALML5,CAMK2D,RRAS2,RRAS,PDIA3,MAPK3,ADCY1,PRKAR1B,RAPGEF3,PRKD3,PRKCA
Gαi Signaling	1.37	0.701	0.108	NaN	PRKACB,SRC,ADCY2,RRAS,ADCY4,HTR1D,STAT3,S1PR3,RRAS2,RAP1GAP,MAPK3,ADCY1,PRKAR1B
phagosome maturation	1.37	0.701	0.108	NaN	ATP6V0A4,LAMP2,HLA-DRB1,RAB5C,PRDX1,TCIRG1,TUBB2A,HLA-DRA,TUBA4A,TAP1,VPS37C,HLA-DRB5,ATP6V1B1
MIF Regulation of Innate Immunity	1.35	0.691	0.146	NaN	PLA2G4E,NFKBIA,MAPK3,PLA2G4F,CD74,PLA2G2A
LPS/IL-1 Mediated Inhibition of RXR Function	1.35	0.691	0.095	NaN	GSTA3,GSTA2,SULT1C4,SULT1C2,TNFRSF1A,ABCC2,SLC35A2,HMGCS2,IL1R2,CHST1,SREBF1,SMOX,CAT,NR1I3,SULT1A3/SULT1A4,CHST3,ABCC3,TNF,HMGCS1,ALDH6A1,TNFRSF11B
Role of NFAT in Regulation of the Immune Response	1.34	0.689	0.0984	NaN	CALML5,RRAS,CD4,HLA-DQA1,HLA-DQB1,FGFR3,RCAN1,RRAS2,NFKBIA,HLA-DRB1,HLA-DMA,MAPK3,FGFR4,HLA-DMB,HLA-DRA,GNAL,HLA-DRB5,ORAI1
Oleate Biosynthesis II (Animals)	1.34	0.687	0.231	NaN	SCD,UFSP1,ALDH6A1
TR/RXR Activation	1.32	0.674	0.112	NaN	FGFR3,ENO1,LDLR,NCOA2,PDE3B,SREBF1,FGFR4,FASN,BCL3,ME1,PFKP
Glioma Signaling	1.32	0.674	0.109	NaN	FGFR3,CALML5,CAMK2D,RRAS2,RRAS,MAPK3,FGFR4,CDK6,PDGFC,PRKD3,IDH1,PRKCA
UVC-Induced MAPK Signaling	1.31	0.67	0.143	NaN	SRC,RRAS2,RRAS,MAPK3,PRKD3,PRKCA
Phototransduction Pathway	1.3	0.67	0.132	NaN	PRKACB,GUCY2D,PRKAR1B,OPN3,RGS9BP,CNGA1,CNGA3
Urea Cycle	1.29	0.67	0.333	NaN	ASS1,CPS1
Ceramide Biosynthesis	1.29	0.67	0.333	NaN	SPTLC2,DEGS2
UDP-N-acetyl-D-glucosamine Biosynthesis II	1.29	0.67	0.333	NaN	PGM3,UAP1
Zymosterol Biosynthesis	1.29	0.67	0.333	NaN	MSMO1,CYP51A1
GDP-mannose Biosynthesis	1.29	0.67	0.333	NaN	PMM1,PMM2
Neuregulin Signaling	1.27	0.667	0.114	NaN	SRC,HSP90B1,RRAS2,BTC,RRAS,MAPK3,ERBB4,RPS6KB2,PRKD3,PRKCA
HER-2 Signaling in Breast Cancer	1.27	0.667	0.114	NaN	FGFR3,ITGB2,CCNE1,RRAS2,RRAS,FGFR4,CDK6,ITGB4,PRKD3,PRKCA
Endothelin-1 Signaling	1.27	0.667	0.0963	NaN	SRC,ADCY2,RRAS,PDIA3,GUCY2D,ADCY4,PLA2G2A,FGFR3,PLA2G4E,RRAS2,MAPK3,FGFR4,ADCY1,PLA2G4F,PNPLA3,PRKD3,GNAL,PRKCA
Serotonin Receptor Signaling	1.27	0.667	0.14	NaN	ADCY2,SMOX,ADCY4,ADCY1,HTR1D,PCBD1
Thrombopoietin Signaling	1.27	0.667	0.123	NaN	FGFR3,RRAS2,RRAS,MAPK3,FGFR4,STAT3,PRKD3,PRKCA
Isoleucine Degradation I	1.25	0.667	0.214	NaN	BCAT2,HADHB,ACAT1
Androgen Biosynthesis	1.25	0.667	0.214	NaN	SRD5A2,SRD5A3,HSD3B7
Superpathway of Citrulline Metabolism	1.25	0.667	0.214	NaN	LOC102724788/PRODH,ASS1,CPS1
Crosstalk between Dendritic Cells and Natural Killer Cells	1.24	0.667	0.112	NaN	CAMK2D,HLA-DRB1,HLA-DRA,IL15,TNFSF10,LTBR,TNF,ITGAL,HLA-DRB5,HLA-E
Cholecystokinin/Gastrin-mediated Signaling	1.24	0.667	0.109	NaN	ROCK2,SRC,RHOV,RRAS2,RRAS,MAPK3,BCAR1,TNF,PRKD3,FNBP1,PRKCA
RANK Signaling in Osteoclasts	1.24	0.667	0.109	NaN	FGFR3,MAP3K9,SRC,CALML5,NFKBIA,MITF,MAPK3,FGFR4,MAP3K8,TNFRSF11A,GSN
Triacylglycerol Biosynthesis	1.23	0.667	0.136	NaN	PLPP5,LPCAT2,DGAT2,ELOVL1,PLPP1,ELOVL6
Virus Entry via Endocytic Pathways	1.22	0.667	0.108	NaN	FGFR3,ITGB2,SRC,RRAS2,RRAS,FGFR4,TFRC,ITGB4,PRKD3,ITGAL,PRKCA
Thrombin Signaling	1.21	0.667	0.0936	NaN	SRC,ADCY2,RRAS,PDIA3,ADCY4,MYLK,FGFR3,ROCK2,RHOV,RRAS2,CAMK2D,MAPK3,FGFR4,ADCY1,GATA6,PRKD3,FNBP1,GNAL,PRKCA
Breast Cancer Regulation by Stathmin1	1.21	0.667	0.0936	NaN	PRKACB,PPP1R14C,ADCY2,CALML5,RRAS,ADCY4,TUBB2A,TUBA4A,FGFR3,ROCK2,CCNE1,RRAS2,CAMK2D,MAPK3,FGFR4,ADCY1,PRKAR1B,PRKD3,PRKCA
Type II Diabetes Mellitus Signaling	1.21	0.667	0.102	NaN	TNFRSF1A,SOCS6,FGFR3,NFKBIA,MAPK3,FGFR4,PRKAA2,INSR,PRKD3,NSMAF,TNF,TNFRSF11B,PRKCA
IL-6 Signaling	1.21	0.667	0.102	NaN	TNFRSF1A,RRAS,STAT3,FGFR3,IL1R2,RRAS2,NFKBIA,MAPK3,FGFR4,HSPB7,MAPKAPK2,TNF,TNFRSF11B
Sertoli Cell-Sertoli Cell Junction Signaling	1.2	0.667	0.0955	NaN	PRKACB,SRC,MAP3K9,RRAS,TJP1,TNFRSF1A,TUBB2A,TUBA4A,CLDN7,BCAR1,RRAS2,MAPK3,PRKAR1B,MAP3K8,TNF,CLDN3,RAB8B
HGF Signaling	1.2	0.667	0.104	NaN	FGFR3,MAP3K9,ELF3,RRAS2,ETS2,RRAS,MAPK3,FGFR4,MAP3K8,STAT3,PRKD3,PRKCA
Thiamin Salvage III	1.19	0.667	1	NaN	TPK1
Glutamate Removal from Folates	1.19	0.667	1	NaN	GGH
Methylglyoxal Degradation VI	1.19	0.667	1	NaN	LDHD
L-cysteine Degradation II	1.19	0.667	1	NaN	CTH
Asparagine Biosynthesis I	1.19	0.667	1	NaN	ASNS
4-hydroxybenzoate Biosynthesis	1.19	0.667	1	NaN	TAT
Alanine Biosynthesis III	1.19	0.667	1	NaN	NFS1
4-hydroxyphenylpyruvate Biosynthesis	1.19	0.667	1	NaN	TAT
Erythropoietin Signaling	1.19	0.667	0.114	NaN	FGFR3,SRC,NFKBIA,RRAS2,RRAS,MAPK3,FGFR4,PRKD3,PRKCA
Acute Myeloid Leukemia Signaling	1.19	0.667	0.11	NaN	FGFR3,RRAS2,RRAS,MAPK3,FGFR4,RPS6KB2,STAT3,HNF1A,EIF4EBP1,IDH1
IL-9 Signaling	1.19	0.667	0.133	NaN	FGFR3,FGFR4,CISH,BCL3,STAT3,TNF
PI3K Signaling in B Lymphocytes	1.18	0.667	0.102	NaN	CD81,IL4R,CALML5,NFKBIA,CAMK2D,RRAS2,C3,DAPP1,RRAS,PDIA3,MAPK3,PLEKHA1,MALT1
Axonal Guidance Signaling	1.18	0.667	0.0826	NaN	PRKACB,BMP4,PDIA3,FZD3,BDNF,WASL,SEMA6A,UNC5B,BCAR1,PDGFC,ROBO1,ADAM21,ROCK2,FGFR3,ADAM28,EFNA5,FGFR4,MAPK3,PRKAR1B,SEMA4A,PRKD3,GDF7,PRKCA,EPHB4,RRAS,TUBB2A,PTCH1,TUBA4A,FZD8,SDCBP,RRAS2,SEMA4G,SEMA3C,EPHA2,ADAM9,GNAL,NRP1
Role of NFAT in Cardiac Hypertrophy	1.18	0.667	0.0938	NaN	PRKACB,SRC,CALML5,ADCY2,TGFBR1,RRAS,PDIA3,ADCY4,FGFR3,RCAN1,RRAS2,CAMK2D,MAPK3,FGFR4,ADCY1,PRKAR1B,PRKD3,PRKCA
nNOS Signaling in Skeletal Muscle Cells	1.18	0.667	0.2	NaN	CALML5,RYR2,SNTB1
NAD biosynthesis II (from tryptophan)	1.18	0.667	0.2	NaN	KMO,TDO2,KYNU
IL-10 Signaling	1.17	0.665	0.118	NaN	IL1R2,CCR1,IL4R,CCR5,NFKBIA,BLVRB,STAT3,TNF
Role of Osteoblasts, Osteoclasts and Chondrocytes in Rheumatoid Arthritis	1.17	0.665	0.0905	NaN	SRC,LRP5,CALML5,BMP4,FZD3,TNFRSF1A,SMAD6,TNFRSF11A,GSN,HNF1A,IL7,FGFR3,IL1R2,FZD8,NFKBIA,CSF1,MAPK3,FGFR4,CALCR,TNF,TNFRSF11B
Death Receptor Signaling	1.16	0.665	0.109	NaN	GAS2,TNFRSF21,NFKBIA,TNFRSF1A,PARP4,PARP8,TNFSF10,HSPB7,TNF,ARHGDIB
CD28 Signaling in T Helper Cells	1.16	0.665	0.101	NaN	CALML5,CD4,HLA-DQA1,HLA-DQB1,MALT1,FGFR3,NFKBIA,HLA-DRB1,HLA-DMA,FGFR4,HLA-DRA,HLA-DMB,HLA-DRB5
Coagulation System	1.16	0.665	0.143	NaN	F9,PROC,F5,SERPINA1,F7
IL-17A Signaling in Fibroblasts	1.16	0.665	0.143	NaN	NFKBIA,MAPK3,LCN2,CEBPD,NFKBIZ
Dopamine Degradation	1.16	0.665	0.143	NaN	ALDH2,SULT1C4,SULT1C2,SMOX,SULT1A3/SULT1A4
Glucocorticoid Receptor Signaling	1.14	0.66	0.0871	NaN	PRKACB,TGFBR1,SLPI,SMARCD2,HSPA5,IL1R2,FGFR3,HSP90B1,NFKBIA,KAT2B,NCOA2,FGFR4,MAPK3,ANXA1,PRKAA2,FKBP5,POLR2L,RRAS,TAT,STAT3,HSPA2,TAF4B,RRAS2,VIPR1,TNF
Agrin Interactions at Neuromuscular Junction	1.14	0.66	0.116	NaN	ITGB2,SRC,RRAS2,RRAS,MAPK3,ERBB4,LAMB1,ITGAL
14-3-3-mediated Signaling	1.14	0.66	0.1	NaN	SRC,TNFRSF1A,PDIA3,RRAS,TUBB2A,TUBA4A,FGFR3,RRAS2,MAPK3,FGFR4,PRKD3,TNF,PRKCA
CCR3 Signaling in Eosinophils	1.14	0.66	0.1	NaN	CALML5,RRAS,MYLK,PLA2G2A,FGFR3,ROCK2,PLA2G4E,RRAS2,MAPK3,FGFR4,PLA2G4F,PRKD3,PRKCA
Growth Hormone Signaling	1.14	0.658	0.111	NaN	FGFR3,MAPK3,FGFR4,SOCS6,IGFBP3,RPS6KB2,STAT3,PRKD3,PRKCA
Cardiac Hypertrophy Signaling	1.12	0.648	0.0894	NaN	PRKACB,MAP3K9,ADCY2,CALML5,TGFBR1,RRAS,PDIA3,ADCY4,FGFR3,ROCK2,ADSS,RHOV,RRAS2,MAPK3,FGFR4,ADCY1,PRKAR1B,MAP3K8,MAPKAPK2,FNBP1,GNAL
Mouse Embryonic Stem Cell Pluripotency	1.12	0.648	0.104	NaN	FGFR3,FZD8,BMP4,RRAS2,RRAS,FZD3,MAPK3,FGFR4,STAT3,HNF1A,ID4
Stearate Biosynthesis I (Animals)	1.11	0.648	0.139	NaN	SRD5A3,FASN,PPT1,ELOVL1,ELOVL6
Glioma Invasiveness Signaling	1.11	0.648	0.114	NaN	FGFR3,TIMP3,RHOV,RRAS2,RRAS,MAPK3,FGFR4,FNBP1
nNOS Signaling in Neurons	1.11	0.648	0.128	NaN	CAPN8,CALML5,CAPN2,PRKD3,RASD1,PRKCA
Hepatic Fibrosis / Hepatic Stellate Cell Activation	1.11	0.648	0.0929	NaN	IGFBP4,IL4R,CCR5,TGFBR1,COL9A1,TNFRSF1A,KLF6,IFNGR1,COL20A1,PDGFC,IL1R2,COL6A1,CSF1,IGFBP3,COL9A2,TNF,TNFRSF11B
PTEN Signaling	1.11	0.648	0.101	NaN	FGFR3,TGFBR1,RRAS2,RRAS,MAPK3,FGFR4,RPS6KB2,MAGIX,BMPR1B,INSR,TNFRSF11A,BCAR1
Extrinsic Prothrombin Activation Pathway	1.11	0.648	0.188	NaN	PROC,F5,F7
P2Y Purigenic Receptor Signaling Pathway	1.1	0.644	0.0985	NaN	PRKACB,ADCY2,PDIA3,RRAS,ADCY4,FGFR3,RRAS2,MAPK3,FGFR4,ADCY1,PRKAR1B,PRKD3,PRKCA
CREB Signaling in Neurons	1.09	0.64	0.0924	NaN	PRKACB,CALML5,ADCY2,RRAS,PDIA3,ADCY4,FGFR3,RRAS2,CAMK2D,MAPK3,FGFR4,ADCY1,PRKAR1B,PRKD3,GNAL,POLR2L,PRKCA
Prolactin Signaling	1.08	0.635	0.108	NaN	FGFR3,RRAS2,RRAS,MAPK3,FGFR4,SOCS6,STAT3,PRKD3,PRKCA
Melatonin Signaling	1.08	0.635	0.113	NaN	PRKACB,CALML5,CAMK2D,PDIA3,MAPK3,PRKAR1B,PRKD3,PRKCA
Molecular Mechanisms of Cancer	1.08	0.634	0.0829	NaN	PRKACB,BMP4,TGFBR1,FZD3,ADCY4,BMPR1B,CDC25B,FGFR3,NFKBIA,CAMK2D,FGFR4,MAPK3,PRKAR1B,PRKD3,PRKCA,SRC,LRP5,ADCY2,RRAS,PTCH1,SMAD6,CDK6,RAPGEF3,FZD8,RHOV,CCNE1,RRAS2,ADCY1,GNAL,FNBP1,CTNND1
Synaptic Long Term Depression	1.08	0.632	0.0959	NaN	GUCY2D,PDIA3,RRAS,RYR2,PLA2G2A,PLA2G4E,RRAS2,MAPK3,NPR1,PLA2G4F,PNPLA3,PRKD3,GNAL,PRKCA
Complement System	1.07	0.631	0.135	NaN	ITGB2,C3,ITGAM,CFB,C5
PEDF Signaling	1.06	0.619	0.107	NaN	ROCK2,FGFR3,NFKBIA,RRAS2,RRAS,BDNF,MAPK3,FGFR4,HNF1A
ErbB4 Signaling	1.06	0.619	0.111	NaN	FGFR3,RRAS2,RRAS,MAPK3,FGFR4,ERBB4,PRKD3,PRKCA
Superoxide Radicals Degradation	1.05	0.619	0.25	NaN	NQO1,CAT
Sphingosine-1-phosphate Signaling	1.05	0.613	0.0984	NaN	S1PR3,FGFR3,RHOV,ADCY2,PDIA3,ACER1,MAPK3,FGFR4,ADCY4,ADCY1,PDGFC,FNBP1
Chondroitin Sulfate Biosynthesis (Late Stages)	1.04	0.613	0.122	NaN	CHST1,SULT1C4,SULT1C2,CHSY3,SULT1A3/SULT1A4,CHST3
Cardiac β-adrenergic Signaling	1.04	0.613	0.0963	NaN	PRKACB,SMPDL3A,PPP1R14C,ADCY2,ADCY4,AKAP9,RYR2,PDE8A,PDE3B,PKIB,ADCY1,PRKAR1B,PDE5A
GPCR-Mediated Nutrient Sensing in Enteroendocrine Cells	1.03	0.61	0.106	NaN	PRKACB,ADCY2,PDIA3,ADCY4,ADCY1,PRKAR1B,PRKD3,PRKCA,FFAR2
Notch Signaling	1.03	0.61	0.132	NaN	CNTN1,DTX4,LFNG,HES1,DLL4
GM-CSF Signaling	1.03	0.608	0.11	NaN	FGFR3,CAMK2D,RRAS2,RRAS,MAPK3,FGFR4,CISH,STAT3
Androgen Signaling	1.01	0.592	0.0991	NaN	PRKACB,SRC,CALML5,KAT2B,NCOA2,MAPK3,PRKAR1B,PRKD3,GNAL,POLR2L,PRKCA
Phospholipases	1	0.586	0.113	NaN	PLA2G4E,PDIA3,PLA2G4F,PNPLA3,PLA1A,PLA2G2A,PLCH1
FAK Signaling	0.998	0.584	0.101	NaN	FGFR3,CAPN8,SRC,ARHGAP26,RRAS2,RRAS,MAPK3,FGFR4,CAPN2,BCAR1
Dendritic Cell Maturation	0.997	0.584	0.0895	NaN	PDIA3,TNFRSF1A,IL15,HLA-DQA1,HLA-DQB1,FGFR3,NFKBIA,HLA-DRB1,HLA-DMA,MAPK3,FGFR4,HLA-DMB,HLA-DRA,LTBR,TNF,HLA-DRB5,TNFRSF11B
Antiproliferative Role of Somatostatin Receptor 2	0.979	0.569	0.107	NaN	FGFR3,SRC,RRAS2,RRAS,GUCY2D,MAPK3,FGFR4,NPR1
CNTF Signaling	0.975	0.569	0.111	NaN	FGFR3,RRAS2,RRAS,MAPK3,FGFR4,RPS6KB2,STAT3
Paxillin Signaling	0.971	0.569	0.0973	NaN	FGFR3,ITGB2,SRC,RRAS2,ITGAM,RRAS,ITGA9,FGFR4,ITGB4,BCAR1,ITGAL
Pathogenesis of Multiple Sclerosis	0.963	0.569	0.222	NaN	CCR1,CCR5
Prostanoid Biosynthesis	0.963	0.569	0.222	NaN	PTGES,TBXAS1
Leucine Degradation I	0.963	0.569	0.222	NaN	BCAT2,HMGCL
GDP-glucose Biosynthesis	0.963	0.569	0.222	NaN	HK2,PGM3
Thyroid Cancer Signaling	0.961	0.569	0.125	NaN	RRAS2,RRAS,BDNF,MAPK3,HNF1A
Neuroprotective Role of THOP1 in Alzheimer's Disease	0.961	0.569	0.125	NaN	PRKACB,PRKAR1B,SERPINA3,HLA-E,APP
Retinol Biosynthesis	0.961	0.569	0.125	NaN	CES1,DHRS9,RDH10,BCO1,PNPLA3
Aldosterone Signaling in Epithelial Cells	0.956	0.568	0.0904	NaN	PDIA3,SLC12A2,DNAJC12,DNAJC3,HSPA5,HSPA2,FGFR3,SCNN1A,SACS,HSP90B1,MAPK3,FGFR4,HSPB7,PRKD3,PRKCA
PAK Signaling	0.955	0.568	0.099	NaN	FGFR3,RRAS2,ARHGAP10,RRAS,MAPK3,FGFR4,WASL,MYLK,PDGFC,TNF
IL-15 Signaling	0.954	0.568	0.105	NaN	FGFR3,RRAS2,RRAS,MAPK3,FGFR4,IL15,STAT3,TNF
Neuropathic Pain Signaling In Dorsal Horn Neurons	0.951	0.568	0.0965	NaN	PRKACB,FGFR3,SRC,CAMK2D,BDNF,PDIA3,MAPK3,FGFR4,PRKAR1B,PRKD3,PRKCA
Communication between Innate and Adaptive Immune Cells	0.941	0.56	0.101	NaN	HLA-DRB1,TLR5,CD4,HLA-DRA,IL15,CD8A,TNF,HLA-DRB5,HLA-E
UVA-Induced MAPK Signaling	0.935	0.556	0.098	NaN	FGFR3,RRAS2,RRAS,PDIA3,MAPK3,FGFR4,PARP4,RPS6KB2,PARP8,PRKCA
Insulin Receptor Signaling	0.933	0.556	0.0922	NaN	PRKACB,PPP1R14C,RRAS,EIF4EBP1,FGFR3,SCNN1A,RRAS2,PDE3B,MAPK3,FGFR4,RPS6KB2,PRKAR1B,INSR
Estrogen-Dependent Breast Cancer Signaling	0.93	0.556	0.104	NaN	FGFR3,SRC,RRAS2,RRAS,MAPK3,FGFR4,HSD17B2,HSD17B8
Dopamine Receptor Signaling	0.93	0.556	0.104	NaN	PRKACB,PPP1R14C,ADCY2,SMOX,ADCY4,ADCY1,PRKAR1B,PCBD1
PDGF Signaling	0.919	0.554	0.1	NaN	FGFR3,SRC,RRAS2,RRAS,MAPK3,FGFR4,STAT3,PDGFC,PRKCA
Epoxysqualene Biosynthesis	0.908	0.554	0.5	NaN	SQLE
β-alanine Degradation I	0.908	0.554	0.5	NaN	ALDH6A1
Spermine Biosynthesis	0.908	0.554	0.5	NaN	AMD1
Proline Degradation	0.908	0.554	0.5	NaN	LOC102724788/PRODH
Palmitate Biosynthesis I (Animals)	0.908	0.554	0.5	NaN	FASN
L-cysteine Degradation III	0.908	0.554	0.5	NaN	MPST
Spermidine Biosynthesis I	0.908	0.554	0.5	NaN	AMD1
Fatty Acid Biosynthesis Initiation II	0.908	0.554	0.5	NaN	FASN
Cysteine Biosynthesis/Homocysteine Degradation	0.908	0.554	0.5	NaN	CTH
Cellular Effects of Sildenafil (Viagra)	0.895	0.544	0.0923	NaN	PRKACB,ADCY2,CALML5,PDIA3,GUCY2D,PDE3B,ADCY4,SLC4A11,ADCY1,PRKAR1B,PDE5A,MYLK
IL-8 Signaling	0.894	0.544	0.0863	NaN	SRC,RRAS,CXCR1,PDGFC,EIF4EBP1,FGFR3,ROCK2,ITGB2,RHOV,ITGAM,RRAS2,MAPK3,FGFR4,PRKD3,FNBP1,PRKCA,IRAK2
Glucose and Glucose-1-phosphate Degradation	0.884	0.54	0.2	NaN	HK2,PGM3
Pentose Phosphate Pathway	0.884	0.54	0.2	NaN	TKT,G6PD
Regulation of IL-2 Expression in Activated and Anergic T Lymphocytes	0.883	0.54	0.101	NaN	CALML5,NFKBIA,TGFBR1,RRAS2,RRAS,MAPK3,TOB1,MALT1
Ovarian Cancer Signaling	0.882	0.54	0.0903	NaN	PRKACB,SRC,FZD3,RRAS,PDGFC,HNF1A,FGFR3,FZD8,RRAS2,MAPK3,FGFR4,RPS6KB2,PRKAR1B
Cardiomyocyte Differentiation via BMP Receptors	0.879	0.54	0.15	NaN	BMP4,SMAD6,BMPR1B
D-myo-inositol (1,3,4)-trisphosphate Biosynthesis	0.879	0.54	0.15	NaN	MINPP1,ITPKB,ITPKC
Melanoma Signaling	0.863	0.526	0.109	NaN	FGFR3,RRAS2,RRAS,MITF,MAPK3,FGFR4
Fc Epsilon RI Signaling	0.857	0.523	0.0924	NaN	FGFR3,PLA2G4E,RRAS2,RRAS,MAPK3,FGFR4,PLA2G4F,TNF,PRKD3,PLA2G2A,PRKCA
Glioblastoma Multiforme Signaling	0.857	0.523	0.0881	NaN	SRC,PDIA3,FZD3,RRAS,CDK6,PDGFC,FGFR3,FZD8,CCNE1,RHOV,RRAS2,MAPK3,FGFR4,FNBP1
HMGB1 Signaling	0.844	0.513	0.0902	NaN	FGFR3,RHOV,RRAS2,KAT2B,RRAS,TNFRSF1A,MAPK3,FGFR4,IFNGR1,TNF,FNBP1,TNFRSF11B
Actin Nucleation by ARP-WASP Complex	0.836	0.506	0.107	NaN	ROCK2,RHOV,RRAS2,RRAS,WASL,FNBP1
Inflammasome pathway	0.832	0.504	0.143	NaN	NOD2,PYCARD,CTSB
Glycogen Degradation II	0.815	0.491	0.182	NaN	PGM3,PYGB
Dolichyl-diphosphooligosaccharide Biosynthesis	0.815	0.491	0.182	NaN	ALG3,DPAGT1
Role of NANOG in Mammalian Embryonic Stem Cell Pluripotency	0.805	0.483	0.0902	NaN	FGFR3,FZD8,BMP4,RRAS2,RRAS,FZD3,MAPK3,FGFR4,GATA6,BMPR1B,STAT3
RAR Activation	0.803	0.482	0.0842	NaN	PRKACB,SRC,ADCY2,RDH10,ADCY4,SMAD6,SMARCD2,KAT2B,DHRS9,ADCY1,PRKAR1B,IGFBP3,REL,MAPKAPK2,PRKD3,PRKCA
T Cell Receptor Signaling	0.8	0.481	0.0917	NaN	FGFR3,CALML5,NFKBIA,RRAS2,RRAS,MAPK3,FGFR4,CD4,MALT1,CD8A
IL-3 Signaling	0.797	0.481	0.0964	NaN	FGFR3,RRAS2,RRAS,MAPK3,FGFR4,STAT3,PRKD3,PRKCA
JAK/Stat Signaling	0.797	0.481	0.0964	NaN	FGFR3,RRAS2,RRAS,MAPK3,FGFR4,CISH,SOCS6,STAT3
Chondroitin Sulfate Biosynthesis	0.785	0.471	0.103	NaN	CHST1,SULT1C4,SULT1C2,CHSY3,SULT1A3/SULT1A4,CHST3
Dermatan Sulfate Biosynthesis (Late Stages)	0.774	0.462	0.109	NaN	CHST1,SULT1C4,SULT1C2,SULT1A3/SULT1A4,CHST3
MSP-RON Signaling Pathway	0.761	0.451	0.102	NaN	FGFR3,ITGB2,ITGAM,CSF1,FGFR4,TNF
ErbB Signaling	0.76	0.451	0.0918	NaN	FGFR3,RRAS2,BTC,RRAS,MAPK3,FGFR4,ERBB4,PRKD3,PRKCA
GPCR-Mediated Integration of Enteroendocrine Signaling Exemplified by an L Cell	0.756	0.449	0.0972	NaN	PRKACB,ADCY2,VIPR1,PDIA3,ADCY4,ADCY1,PRKAR1B
Putrescine Degradation III	0.748	0.447	0.13	NaN	ALDH2,SMOX,SAT1
Thyroid Hormone Biosynthesis	0.746	0.447	0.333	NaN	CTSD
Tyrosine Biosynthesis IV	0.746	0.447	0.333	NaN	PCBD1
4-aminobutyrate Degradation I	0.746	0.447	0.333	NaN	SUCLG2
N-acetylglucosamine Degradation I	0.746	0.447	0.333	NaN	GNPDA2
LPS-stimulated MAPK Signaling	0.737	0.444	0.093	NaN	FGFR3,NFKBIA,RRAS2,RRAS,MAPK3,FGFR4,PRKD3,PRKCA
Ephrin A Signaling	0.737	0.444	0.1	NaN	ROCK2,FGFR3,FGFR4,EFNA5,EPHA2,BCAR1
Dermatan Sulfate Biosynthesis	0.737	0.444	0.1	NaN	CHST1,SULT1C4,SULT1C2,CHSY3,SULT1A3/SULT1A4,CHST3
Primary Immunodeficiency Signaling	0.721	0.429	0.104	NaN	CD4,CIITA,CD8A,TAP1,TAP2
TGF-β Signaling	0.719	0.428	0.092	NaN	TGFBR1,BMP4,RRAS2,RRAS,MAPK3,SMAD6,BMPR1B,ACVR1C
Interferon Signaling	0.709	0.422	0.111	NaN	IFI6,IFNGR1,PSMB8,TAP1
autophagy	0.709	0.422	0.111	NaN	LAMP2,ATG4A,MAP1LC3A,SQSTM1
Role of IL-17A in Psoriasis	0.699	0.415	0.154	NaN	S100A9,S100A8
Glycogen Degradation III	0.699	0.415	0.154	NaN	PGM3,PYGB
Cancer Drug Resistance By Drug Efflux	0.695	0.414	0.102	NaN	RRAS2,RRAS,MAPK3,ABCC2,PDK1
TREM1 Signaling	0.695	0.414	0.0933	NaN	NOD2,TLR5,MAPK3,CIITA,STAT3,NLRP2,TNF
Human Embryonic Stem Cell Pluripotency	0.692	0.414	0.0839	NaN	S1PR3,FGFR3,FZD8,TGFBR1,BMP4,BDNF,FZD3,FGFR4,LEFTY1,SMAD6,PDGFC,HNF1A
mTOR Signaling	0.69	0.414	0.0804	NaN	RRAS,EIF4G1,PDGFC,EIF4EBP1,FGFR3,RHOV,RRAS2,MAPK3,FGFR4,RPS6KB2,PRKAA2,INSR,RPS12,PRKD3,FNBP1,PRKCA
Mitochondrial Dysfunction	0.689	0.414	0.0819	NaN	MT-ATP6,ATP5G1,XDH,MT-ND4,BACE1,NDUFAF2,MT-ND4L,CYB5R3,NDUFA13,APP,MT-ND1,CAT,ACO1,AIFM1
tRNA Splicing	0.68	0.41	0.108	NaN	SMPDL3A,PDE8A,PDE3B,PDE5A
Ethanol Degradation II	0.68	0.41	0.108	NaN	ALDH2,DHRS9,ACSS1,PECR
Neurotrophin/TRK Signaling	0.676	0.41	0.0921	NaN	FGFR3,RRAS2,SPRY1,RRAS,BDNF,MAPK3,FGFR4
Antioxidant Action of Vitamin C	0.674	0.41	0.0874	NaN	PLA2G4E,NFKBIA,PDIA3,MAPK3,PLA2G4F,PNPLA3,TNF,GLRX,PLA2G2A
VEGF Signaling	0.674	0.41	0.0874	NaN	ROCK2,FGFR3,SRC,RRAS2,RRAS,MAPK3,FGFR4,PDGFC,PRKCA
Glycolysis I	0.673	0.41	0.12	NaN	ENO1,ALDOA,PFKP
Gluconeogenesis I	0.673	0.41	0.12	NaN	ENO1,ALDOA,ME1
Ethanol Degradation IV	0.673	0.41	0.12	NaN	ALDH2,CAT,ACSS1
Non-Small Cell Lung Cancer Signaling	0.657	0.403	0.0909	NaN	FGFR3,RRAS2,RRAS,MAPK3,FGFR4,CDK6,PRKCA
Ephrin Receptor Signaling	0.652	0.403	0.0805	NaN	SRC,EPHB4,RRAS,WASL,STAT3,PDGFC,BCAR1,ROCK2,RRAS2,SDCBP,MAPK3,EFNA5,EPHA2,GNAL
Gαq Signaling	0.651	0.403	0.0812	NaN	CALML5,RGS2,CHRM1,FGFR3,ROCK2,RHOV,NFKBIA,MAPK3,FGFR4,CALCR,PRKD3,FNBP1,PRKCA
Pyridoxal 5'-phosphate Salvage Pathway	0.651	0.403	0.0938	NaN	MAP3K9,DAPK1,MAPK3,CDK6,PRKAA2,MAP3K8
Phenylalanine Degradation IV (Mammalian, via Side Chain)	0.65	0.403	0.143	NaN	ALDH2,SMOX
IL-1 Signaling	0.648	0.403	0.0879	NaN	PRKACB,ADCY2,NFKBIA,ADCY4,ADCY1,PRKAR1B,GNAL,IRAK2
Antiproliferative Role of TOB in T Cell Signaling	0.64	0.403	0.115	NaN	CCNE1,TGFBR1,TOB1
Airway Inflammation in Asthma	0.634	0.403	0.25	NaN	TNF
Pentose Phosphate Pathway (Oxidative Branch)	0.634	0.403	0.25	NaN	G6PD
Heme Degradation	0.634	0.403	0.25	NaN	BLVRB
PRPP Biosynthesis I	0.634	0.403	0.25	NaN	PRPS2
Heme Biosynthesis from Uroporphyrinogen-III I	0.634	0.403	0.25	NaN	CPOX
Phenylethylamine Degradation I	0.634	0.403	0.25	NaN	ALDH2
Ascorbate Recycling (Cytosolic)	0.634	0.403	0.25	NaN	GLRX
α-tocopherol Degradation	0.634	0.403	0.25	NaN	CYP4F12
Proline Biosynthesis I	0.634	0.403	0.25	NaN	PYCR1
Glycerol-3-phosphate Shuttle	0.634	0.403	0.25	NaN	GPD1L
Melatonin Degradation II	0.634	0.403	0.25	NaN	SMOX
N-acetylglucosamine Degradation II	0.634	0.403	0.25	NaN	GNPDA2
Phenylalanine Degradation I (Aerobic)	0.634	0.403	0.25	NaN	PCBD1
Acetate Conversion to Acetyl-CoA	0.634	0.403	0.25	NaN	ACSS1
Netrin Signaling	0.626	0.395	0.103	NaN	PRKACB,RYR2,UNC5B,PRKAR1B
Salvage Pathways of Pyrimidine Ribonucleotides	0.615	0.386	0.086	NaN	MAP3K9,DAPK1,CMPK2,MAPK3,UPP1,CDK6,PRKAA2,MAP3K8
UVB-Induced MAPK Signaling	0.611	0.384	0.0909	NaN	FGFR3,MAPK3,FGFR4,PRKD3,EIF4EBP1,PRKCA
Semaphorin Signaling in Neurons	0.604	0.378	0.0943	NaN	ROCK2,RHOV,MAPK3,FNBP1,NRP1
Role of PKR in Interferon Induction and Antiviral Response	0.601	0.377	0.1	NaN	NFKBIA,TNFRSF1A,RNASEL,TNF
Noradrenaline and Adrenaline Degradation	0.601	0.377	0.1	NaN	ALDH2,DHRS9,SMOX,PECR
Prostate Cancer Signaling	0.599	0.377	0.0851	NaN	FGFR3,CCNE1,HSP90B1,NFKBIA,RRAS2,RRAS,MAPK3,FGFR4
Gustation Pathway	0.597	0.377	0.082	NaN	PRKACB,SMPDL3A,SCNN1A,PDE8A,ADCY2,PDE3B,ADCY4,ADCY1,PRKAR1B,PDE5A
Eicosanoid Signaling	0.592	0.373	0.0896	NaN	PTGES,PLA2G4E,PLA2G4F,PNPLA3,TBXAS1,PLA2G2A
Renal Cell Carcinoma Signaling	0.586	0.369	0.0864	NaN	FGFR3,RRAS2,RRAS,MAPK3,FGFR4,EGLN3,FH
Nicotine Degradation III	0.583	0.367	0.0926	NaN	UGT2B4,UGT2B7,UGT2B10,CYP51A1,UGT2B15
Mechanisms of Viral Exit from Host Cells	0.577	0.362	0.0976	NaN	SH3GL2,PRKD3,VPS37C,PRKCA
Remodeling of Epithelial Adherens Junctions	0.574	0.362	0.0882	NaN	SRC,RAB5C,TUBB2A,TUBA4A,MAPRE2,CTNND1
EGF Signaling	0.574	0.362	0.0882	NaN	FGFR3,SRC,MAPK3,FGFR4,STAT3,PRKCA
Chondroitin Sulfate Degradation (Metazoa)	0.565	0.357	0.125	NaN	GM2A,HEXB
γ-glutamyl Cycle	0.565	0.357	0.125	NaN	CHAC1,GGT6
Methylglyoxal Degradation III	0.565	0.357	0.125	NaN	AKR7A3,AKR1B10
ErbB2-ErbB3 Signaling	0.556	0.354	0.087	NaN	FGFR3,RRAS2,RRAS,MAPK3,FGFR4,STAT3
Amyotrophic Lateral Sclerosis Signaling	0.555	0.354	0.0811	NaN	FGFR3,CAPN8,RAB5C,FGFR4,GPX1,CAT,CAPN2,PDGFC,SSR4
Trehalose Degradation II (Trehalase)	0.551	0.354	0.2	NaN	HK2
Citrulline-Nitric Oxide Cycle	0.551	0.354	0.2	NaN	ASS1
Lactose Degradation III	0.551	0.354	0.2	NaN	GLB1
Tyrosine Degradation I	0.551	0.354	0.2	NaN	TAT
Glutamate Degradation III (via 4-aminobutyrate)	0.551	0.354	0.2	NaN	SUCLG2
Intrinsic Prothrombin Activation Pathway	0.55	0.354	0.103	NaN	F9,PROC,F5
Glutathione-mediated Detoxification	0.55	0.354	0.103	NaN	GSTA3,GSTA2,GGH
Role of Hypercytokinemia/hyperchemokinemia in the Pathogenesis of Influenza	0.531	0.337	0.093	NaN	CCR1,CCR5,IL15,TNF
Dermatan Sulfate Degradation (Metazoa)	0.528	0.336	0.118	NaN	GM2A,HEXB
Adenosine Nucleotides Degradation II	0.528	0.336	0.118	NaN	XDH,ADAT3
Wnt/Ca+ pathway	0.524	0.335	0.0877	NaN	FZD8,FZD3,PDIA3,ROR1,PRKCA
FLT3 Signaling in Hematopoietic Progenitor Cells	0.523	0.335	0.0824	NaN	FGFR3,RRAS2,RRAS,MAPK3,FGFR4,STAT3,EIF4EBP1
Sonic Hedgehog Signaling	0.523	0.335	0.1	NaN	PRKACB,PTCH1,PRKAR1B
iNOS Signaling	0.51	0.323	0.0909	NaN	CALML5,NFKBIA,IFNGR1,IRAK2
Superpathway of Methionine Degradation	0.498	0.319	0.0968	NaN	PCCA,CTH,MUT
Bladder Cancer Signaling	0.494	0.319	0.0805	NaN	FGFR3,DAPK1,RRAS2,RRAS,MAPK3,PDGFC,MMP17
D-myo-inositol (1,4,5)-trisphosphate Degradation	0.494	0.319	0.111	NaN	IMPAD1,IMPA2
Agranulocyte Adhesion and Diapedesis	0.492	0.319	0.0741	NaN	CD99,SELL,TNFRSF1A,RDX,CXCR1,CLDN7,C5,ITGB2,EZR,PECAM1,CX3CL1,TNF,CLDN3,MMP17
Ephrin B Signaling	0.491	0.319	0.0822	NaN	ROCK2,EPHB4,MAPK3,CAP1,ITSN2,GNAL
p70S6K Signaling	0.486	0.319	0.0763	NaN	FGFR3,SRC,IL4R,RRAS2,RRAS,PDIA3,MAPK3,FGFR4,PRKD3,PRKCA
Arginine Biosynthesis IV	0.485	0.319	0.167	NaN	ASS1
Proline Biosynthesis II (from Arginine)	0.485	0.319	0.167	NaN	PYCR1
Chondroitin and Dermatan Biosynthesis	0.485	0.319	0.167	NaN	CHSY3
Arginine Degradation VI (Arginase 2 Pathway)	0.485	0.319	0.167	NaN	PYCR1
Pentose Phosphate Pathway (Non-oxidative Branch)	0.485	0.319	0.167	NaN	TKT
Selenocysteine Biosynthesis II (Archaea and Eukaryotes)	0.485	0.319	0.167	NaN	SEPHS2
Ceramide Degradation	0.485	0.319	0.167	NaN	ACER1
Rapoport-Luebering Glycolytic Shunt	0.485	0.319	0.167	NaN	MINPP1
NAD Biosynthesis III	0.485	0.319	0.167	NaN	NAMPT
Molybdenum Cofactor Biosynthesis	0.485	0.319	0.167	NaN	NFS1
NGF Signaling	0.479	0.314	0.0769	NaN	ROCK2,FGFR3,MAP3K9,RRAS2,RRAS,MAPK3,FGFR4,RPS6KB2,MAP3K8
Pyrimidine Ribonucleotides Interconversion	0.474	0.31	0.0938	NaN	CMPK2,ENTPD1,ENTPD6
Glutathione Redox Reactions I	0.462	0.3	0.105	NaN	GPX2,GPX1
Hematopoiesis from Pluripotent Stem Cells	0.452	0.29	0.0851	NaN	CSF1,CD4,CD8A,IL7
Activation of IRF by Cytosolic Pattern Recognition Receptors	0.44	0.281	0.0806	NaN	IFIH1,NFKBIA,PPIB,IFIT2,TNF
fMLP Signaling in Neutrophils	0.434	0.281	0.0744	NaN	FGFR3,CALML5,NFKBIA,RRAS2,RRAS,MAPK3,FGFR4,PRKD3,PRKCA
The Visual Cycle	0.434	0.281	0.1	NaN	DHRS9,RDH10
1D-myo-inositol Hexakisphosphate Biosynthesis II (Mammalian)	0.434	0.281	0.1	NaN	ITPKB,ITPKC
Purine Nucleotides Degradation II (Aerobic)	0.434	0.281	0.1	NaN	XDH,ADAT3
Angiopoietin Signaling	0.433	0.281	0.0779	NaN	FGFR3,GRB14,NFKBIA,RRAS2,RRAS,FGFR4
Adenine and Adenosine Salvage III	0.432	0.281	0.143	NaN	ADAT3
Role of JAK2 in Hormone-like Cytokine Signaling	0.43	0.281	0.0882	NaN	SOCS6,STAT3,SIRPA
Retinoate Biosynthesis I	0.43	0.281	0.0882	NaN	DHRS9,RDH10,AKR1B10
Pyrimidine Ribonucleotides De Novo Biosynthesis	0.43	0.281	0.0882	NaN	CMPK2,ENTPD1,ENTPD6
Reelin Signaling in Neurons	0.428	0.28	0.0761	NaN	FGFR3,MAP3K9,ITGB2,SRC,FGFR4,ITGAL,APP
ERK5 Signaling	0.425	0.28	0.0794	NaN	SRC,RRAS2,RRAS,RPS6KB2,MAP3K8
Nicotine Degradation II	0.425	0.28	0.0794	NaN	UGT2B4,UGT2B7,UGT2B10,CYP51A1,UGT2B15
PCP pathway	0.425	0.28	0.0794	NaN	ROCK2,FZD8,SDC1,FZD3,LGR4
Role of Tissue Factor in Cancer	0.423	0.28	0.0738	NaN	FGFR3,SRC,RRAS2,RRAS,CSF1,MAPK3,FGFR4,F7,PRKCA
CD40 Signaling	0.419	0.277	0.0769	NaN	FGFR3,NFKBIA,MAPK3,FGFR4,STAT3,MAPKAPK2
Endometrial Cancer Signaling	0.41	0.27	0.0781	NaN	FGFR3,RRAS2,RRAS,MAPK3,FGFR4
IL-2 Signaling	0.41	0.27	0.0781	NaN	FGFR3,RRAS2,RRAS,MAPK3,FGFR4
Maturity Onset Diabetes of Young (MODY) Signaling	0.407	0.269	0.0952	NaN	INSR,HNF1A
Oxidative Ethanol Degradation III	0.407	0.269	0.0952	NaN	ALDH2,ACSS1
Wnt/β-catenin Signaling	0.403	0.266	0.071	NaN	FZD8,SRC,LRP5,TGFBR1,CDH3,FZD3,TLE4,SOX9,KREMEN1,SOX11,HNF1A,ACVR1C
B Cell Receptor Signaling	0.395	0.26	0.0703	NaN	MAP3K9,CALML5,RRAS,MALT1,FGFR3,RRAS2,CAMK2D,NFKBIA,DAPP1,MAPK3,FGFR4,RPS6KB2,MAP3K8
Tec Kinase Signaling	0.394	0.26	0.0706	NaN	TNFRSF21,FGFR3,SRC,RHOV,FGFR4,TNFSF10,STAT3,TNF,PRKD3,FNBP1,GNAL,PRKCA
Airway Pathology in Chronic Obstructive Pulmonary Disease	0.387	0.257	0.125	NaN	TNF
Sphingosine and Sphingosine-1-phosphate Metabolism	0.387	0.257	0.125	NaN	ACER1
Citrulline Biosynthesis	0.387	0.257	0.125	NaN	LOC102724788/PRODH
Purine Ribonucleosides Degradation to Ribose-1-phosphate	0.387	0.257	0.125	NaN	ADAT3
Polyamine Regulation in Colon Cancer	0.382	0.254	0.0909	NaN	MXD1,SAT1
Telomerase Signaling	0.382	0.254	0.0721	NaN	FGFR3,HSP90B1,ELF3,RRAS2,ETS2,RRAS,MAPK3,FGFR4
RhoGDI Signaling	0.37	0.246	0.0694	NaN	ROCK2,SRC,RHOV,CDH3,EZR,WASL,RDX,GRIP1,ARHGDIB,FNBP1,GNAL,PRKCA
Lymphotoxin β Receptor Signaling	0.369	0.246	0.0746	NaN	FGFR3,NFKBIA,MAPK3,FGFR4,LTBR
Role of IL-17A in Arthritis	0.369	0.246	0.0746	NaN	FGFR3,NFKBIA,MAPK3,FGFR4,MAPKAPK2
Heparan Sulfate Biosynthesis (Late Stages)	0.369	0.246	0.0746	NaN	CHST1,SULT1C4,SULT1C2,SULT1A3/SULT1A4,CHST3
AMPK Signaling	0.364	0.242	0.0688	NaN	PRKACB,FGFR3,SRC,KAT2B,TBC1D1,FGFR4,FASN,PRKAR1B,PRKAA2,SMARCD2,INSR,PFKP,EIF4EBP1
Differential Regulation of Cytokine Production in Intestinal Epithelial Cells by IL-17A and IL-17F	0.359	0.24	0.087	NaN	LCN2,TNF
TCA Cycle II (Eukaryotic)	0.359	0.24	0.087	NaN	ACO1,FH
FcγRIIB Signaling in B Lymphocytes	0.355	0.237	0.0755	NaN	FGFR3,RRAS2,RRAS,FGFR4
Phospholipase C Signaling	0.35	0.235	0.0675	NaN	SRC,CALML5,ADCY2,RRAS,ADCY4,RAPGEF3,PLA2G2A,PLA2G4E,RHOV,RRAS2,MAPK3,ADCY1,PLA2G4F,PRKD3,FNBP1,PRKCA
Assembly of RNA Polymerase I Complex	0.349	0.235	0.111	NaN	TAF1A
Sucrose Degradation V (Mammalian)	0.349	0.235	0.111	NaN	ALDOA
Heme Biosynthesis II	0.349	0.235	0.111	NaN	CPOX
Gα12/13 Signaling	0.346	0.234	0.0692	NaN	ROCK2,FGFR3,SRC,NFKBIA,RRAS2,RRAS,CDH3,MAPK3,FGFR4
CCR5 Signaling in Macrophages	0.344	0.234	0.0725	NaN	CALML5,CCR5,CD4,PRKD3,PRKCA
HIF1α Signaling	0.343	0.234	0.0696	NaN	FGFR3,RRAS2,RRAS,MAPK3,FGFR4,EGLN3,PDGFC,MMP17
Epithelial Adherens Junction Signaling	0.34	0.234	0.0685	NaN	SRC,TGFBR1,RRAS2,RRAS,WASL,TUBB2A,TUBA4A,HNF1A,ACVR1C,CTNND1
Estrogen Biosynthesis	0.339	0.234	0.0769	NaN	CYP51A1,HSD17B2,HSD17B8
Inhibition of Matrix Metalloproteases	0.339	0.234	0.0769	NaN	TIMP3,SDC1,MMP17
IL-22 Signaling	0.338	0.234	0.0833	NaN	MAPK3,STAT3
Tumoricidal Function of Hepatic Natural Killer Cells	0.338	0.234	0.0833	NaN	ITGAL,AIFM1
Role of JAK1, JAK2 and TYK2 in Interferon Signaling	0.338	0.234	0.0833	NaN	IFNGR1,STAT3
IL-17 Signaling	0.336	0.233	0.0706	NaN	FGFR3,RRAS2,RRAS,MAPK3,FGFR4,MAPKAPK2
Transcriptional Regulatory Network in Embryonic Stem Cells	0.323	0.221	0.075	NaN	GATA6,OTX1,STAT3
IL-17A Signaling in Gastric Cells	0.318	0.219	0.08	NaN	MAPK3,TNF
Role of JAK family kinases in IL-6-type Cytokine Signaling	0.318	0.219	0.08	NaN	MAPK3,STAT3
Tryptophan Degradation X (Mammalian, via Tryptamine)	0.318	0.219	0.08	NaN	ALDH2,SMOX
Calcium Transport I	0.316	0.218	0.1	NaN	ATP2C2
Basal Cell Carcinoma Signaling	0.309	0.213	0.0694	NaN	FZD8,BMP4,FZD3,PTCH1,HNF1A
Actin Cytoskeleton Signaling	0.309	0.213	0.0658	NaN	RRAS,WASL,RDX,MYLK,GSN,PDGFC,BCAR1,FGFR3,ROCK2,DIAPH1,RRAS2,CYFIP1,MAPK3,FGFR4,EZR
Chronic Myeloid Leukemia Signaling	0.302	0.207	0.0673	NaN	FGFR3,TGFBR1,RRAS2,RRAS,MAPK3,FGFR4,CDK6
Signaling by Rho Family GTPases	0.289	0.195	0.0648	NaN	MAP3K9,CDC42EP5,WASL,WASF3,RDX,MYLK,FGFR3,ROCK2,RHOV,CDH3,CYFIP1,MAPK3,FGFR4,EZR,FNBP1,GNAL
Purine Nucleotides De Novo Biosynthesis II	0.287	0.195	0.0909	NaN	ADSS
Mineralocorticoid Biosynthesis	0.287	0.195	0.0909	NaN	HSD3B7
FGF Signaling	0.286	0.195	0.0667	NaN	FGFR3,MAPK3,FGFR4,STAT3,MAPKAPK2,PRKCA
phagosome formation	0.282	0.194	0.0656	NaN	FGFR3,RHOV,TLR5,PDIA3,FGFR4,PRKD3,FNBP1,PRKCA
IL-15 Production	0.282	0.194	0.0741	NaN	IL15,PTK6
Role of RIG1-like Receptors in Antiviral Innate Immunity	0.281	0.193	0.0698	NaN	IFIH1,NFKBIA,TRIM25
Heparan Sulfate Biosynthesis	0.278	0.192	0.0667	NaN	CHST1,SULT1C4,SULT1C2,SULT1A3/SULT1A4,CHST3
Induction of Apoptosis by HIV1	0.268	0.186	0.0667	NaN	NFKBIA,TNFRSF1A,TNF,TNFRSF11B
Role of PI3K/AKT Signaling in the Pathogenesis of Influenza	0.268	0.186	0.0658	NaN	FGFR3,CCR5,NFKBIA,MAPK3,FGFR4
GDNF Family Ligand-Receptor Interactions	0.268	0.186	0.0658	NaN	FGFR3,RRAS2,RRAS,MAPK3,FGFR4
Triacylglycerol Degradation	0.268	0.186	0.0682	NaN	CES1,MGLL,PNPLA3
PI3K/AKT Signaling	0.267	0.186	0.0645	NaN	HSP90B1,NFKBIA,RRAS2,RRAS,MAPK3,RPS6KB2,MAP3K8,EIF4EBP1
Acyl-CoA Hydrolysis	0.262	0.183	0.0833	NaN	PPT1
Glucocorticoid Biosynthesis	0.262	0.183	0.0833	NaN	HSD3B7
Fcγ Receptor-mediated Phagocytosis in Macrophages and Monocytes	0.26	0.182	0.0645	NaN	SRC,MAPK3,EZR,RPS6KB2,PRKD3,PRKCA
IL-17A Signaling in Airway Cells	0.259	0.182	0.0649	NaN	FGFR3,NFKBIA,MAPK3,FGFR4,STAT3
TNFR2 Signaling	0.251	0.175	0.069	NaN	NFKBIA,TNF
Role of Oct4 in Mammalian Embryonic Stem Cell Pluripotency	0.244	0.169	0.0652	NaN	PHB,ETS2,TDRD7
NAD Phosphorylation and Dephosphorylation	0.239	0.167	0.0769	NaN	NADK2
Bile Acid Biosynthesis, Neutral Pathway	0.239	0.167	0.0769	NaN	HSD3B7
Guanosine Nucleotides Degradation III	0.239	0.167	0.0769	NaN	XDH
4-1BB Signaling in T Lymphocytes	0.224	0.152	0.0645	NaN	NFKBIA,MAPK3
Leukotriene Biosynthesis	0.22	0.15	0.0714	NaN	GGT6
Urate Biosynthesis/Inosine 5'-phosphate Degradation	0.22	0.15	0.0714	NaN	XDH
Vitamin-C Transport	0.202	0.133	0.0667	NaN	GLRX

## Sheet: MM134 LTED down-reg pathway
Ingenuity Canonical Pathways		-log(p-value)	-log(B-H p-value)	Ratio	z-score	Molecules
Axonal Guidance Signaling		16.8	14.2	0.183	NaN	PLCB2,EPHB2,GNB5,SEMA6B,SEMA4F,NCK2,MICAL1,SEMA6D,ABLIM3,UNC5D,MRAS,SRGAP2,EFNB3,PLCL1,RTN4R,FZD2,PRKD1,ADAMTS4,ITGA4,EPHA7,EFNA2,PIK3C2B,TUBB3,NGEF,KALRN,ADAMTS1,WNT9A,FGFR1,ITGA5,FGFR2,L1CAM,GNAZ,DPYSL5,SRGAP3,ADAMTS6,ADAM12,IRS1,PRKCD,GNAO1,PAK5,ADAM22,FYN,UNC5A,SLIT1,VEGFB,EPHA4,SEMA6C,SEMA4C,TUBB2B,PGF,EFNB2,GLI3,SDC2,PRKCE,MMP11,ROBO2,ERBB2,SEMA3F,PLCD4,PPP3CA,BMP1,GNG4,PLXNA1,PLXNC1,CXCR4,…
Molecular Mechanisms of Cancer		7.02	4.7	0.142	NaN	CDKN2A,PLCB2,JAK1,SMAD3,MYC,BBC3,TGFB1,MRAS,FZD2,PRKD1,RALGDS,ITGA4,RND2,PIK3C2B,WNT9A,FGFR1,RALB,ITGA5,FGFR2,ARHGEF17,GNAZ,MAPK12,RHOQ,RND3,PRKCD,IRS1,GNAO1,MAPK10,APH1B,PAK5,FYN,MAPK11,CDKN2B,RHOH,BCL2,SYNGAP1,ARHGEF19,RHOU,PRKCE,BMP1,CAMK2B,SMAD7,PIK3C2G,BMP5,FOS,PRKAR2B,FZD4,PAK3,CDKN1A,BMP7,WNT11,BCL2L11,FZD7
Neuropathic Pain Signaling In Dorsal Horn Neurons		6.53	4.38	0.211	NaN	PIK3C2B,GRIN1,PLCB2,CAMK1,CAMK1D,FGFR1,PIK3C2G,FGFR2,GRM4,KCNH2,FOS,KCNN1,NTRK2,PRKAR2B,GPR37,PRKCD,IRS1,PRKCE,KCNQ3,PLCL1,PLCD4,PRKD1,GRIA3,CAMK2B
Ephrin Receptor Signaling		5.99	3.96	0.172	NaN	FYN,PTPN13,EPHB2,GNB5,VEGFB,EPHA4,PGF,NCK2,EFNB2,SORBS1,SDC2,MRAS,EFNB3,ITGA4,GNG4,EFNA2,EPHA7,GRIN1,NGEF,KALRN,CXCR4,PIK3C2G,ITGA5,GNAZ,EFNA4,EFNA1,EPHA10,PAK3,GNAO1,PAK5
Tec Kinase Signaling		5.71	3.82	0.171	NaN	FYN,JAK1,GNB5,RHOH,RHOU,MRAS,PRKCE,PRKD1,ITGA4,RND2,GNG4,PIK3C2B,FGFR1,PIK3C2G,ITGA5,FGFR2,GNAZ,MAPK12,FOS,RHOQ,PAK3,RND3,IRS1,VAV3,PRKCD,TNFRSF25,GNAO1,MAPK10,PAK5
Colorectal Cancer Metastasis Signaling		5.67	3.82	0.15	NaN	JAK1,PTGER3,MMP16,SMAD3,GNB5,VEGFB,MMP25,RHOH,MMP24,PGF,MYC,ARRB1,TGFB1,RHOU,MRAS,MMP11,FZD2,RALGDS,RND2,GNG4,PIK3C2B,WNT9A,GRK3,FGFR1,PIK3C2G,FGFR2,MAPK12,FOS,FZD4,PRKAR2B,RHOQ,RND3,IRS1,MAPK10,MMP9,WNT11,FZD7
GDNF Family Ligand-Receptor Interactions		5.18	3.4	0.224	NaN	PIK3C2B,ARTN,DOK6,FGFR1,PIK3C2G,FGFR2,GFRA2,MAPK12,FOS,PDLIM7,NRTN,DOK4,IRS1,MRAS,MAPK10,DOK7,RET
Role of NFAT in Cardiac Hypertrophy		5.09	3.39	0.156	NaN	PLCB2,CAMK1,CAMK1D,GNB5,MAPK11,TGFB1,HDAC11,MRAS,IGF1R,PRKCE,PLCL1,PLCD4,PRKD1,PPP3CA,CAMK2B,GNG4,AKAP5,PIK3C2B,FGFR1,MEF2A,PIK3C2G,FGFR2,SLC8A2,MAPK12,PRKAR2B,PRKCD,IRS1,MAPK10,RCAN3,GATA4
Hepatic Fibrosis / Hepatic Stellate Cell Activation		5.06	3.39	0.158	NaN	FN1,COL4A5,LHX2,COL4A6,SMAD3,COL9A3,VEGFB,BCL2,PGF,COL16A1,TIMP1,TGFB1,IGF1R,ECE1,SERPINE1,KLF12,COL18A1,IL1RAP,FLT1,FGFR1,COL2A1,SMAD7,FGFR2,BAMBI,IGFBP5,COL1A1,TGFA,A2M,MMP9
ErbB Signaling		4.76	3.14	0.194	NaN	PIK3C2B,FGFR1,PIK3C2G,FGFR2,MAPK12,MAPK11,AREG,NCK2,FOS,PAK3,PRKCD,IRS1,TGFA,MRAS,MAPK10,PRKCE,PAK5,ERBB2,PRKD1
Leukocyte Extravasation Signaling		4.73	3.14	0.148	NaN	MMP16,CLDN19,RAPGEF4,MMP25,MAPK11,RHOH,MMP24,TIMP1,PRKCE,MMP11,PRKD1,ITGA4,PIK3C2B,CXCR4,FGFR1,PIK3C2G,ITGA6,ITGA5,FGFR2,MAPK12,CLDN23,CLDN8,CLDN1,IRS1,VAV3,PRKCD,MAPK10,CD44,MMP9,MSN,ARHGAP8/PRR5-ARHGAP8
Thrombin Signaling		4.61	3.08	0.148	NaN	GATA5,PLCB2,CAMK1,CAMK1D,GNB5,RHOH,GATA2,MAPK11,PPP1R12B,RHOU,MRAS,PRKCE,PLCL1,PLCD4,PRKD1,CAMK2B,RND2,GNG4,PIK3C2B,FGFR1,PIK3C2G,FGFR2,GNAZ,MAPK12,RHOQ,RND3,PRKCD,IRS1,GNAO1,GATA4
Ephrin A Signaling		4.59	3.08	0.233	NaN	EFNA2,EPHA7,PIK3C2B,FYN,NGEF,FGFR1,PIK3C2G,FGFR2,EPHA4,EFNA4,EFNA1,EPHA10,VAV3,IRS1
14-3-3-mediated Signaling		4.43	2.95	0.169	NaN	PIK3C2B,PLCB2,TUBB3,YAP1,TP73,FGFR1,PIK3C2G,FGFR2,MAPK12,TUBB2B,FOS,TUBA1A,TUBB6,MAPT,PRKCD,IRS1,MRAS,MAPK10,PRKCE,PLCL1,PLCD4,PRKD1
STAT3 Pathway		4.19	2.73	0.205	NaN	MYC,SOCS3,NTRK2,FLT1,PIM1,FGFR1,CDKN1A,IGF1R,MAPK10,MRAS,FGFR2,FGFRL1,MAPK12,MAPK11,BCL2
CXCR4 Signaling		4.12	2.7	0.152	NaN	PLCB2,GNB5,RHOH,MRAS,RHOU,PRKCE,PRKD1,RND2,GNG4,PIK3C2B,CXCR4,FGFR1,PIK3C2G,FGFR2,GNAZ,MAPK12,FOS,RHOQ,PAK3,RND3,IRS1,PRKCD,GNAO1,MAPK10,PAK5
Pancreatic Adenocarcinoma Signaling		4.1	2.7	0.169	NaN	CDKN2A,PIK3C2B,JAK1,SMAD3,FGFR1,PIK3C2G,VEGFB,FGFR2,MAPK12,CDKN2B,BCL2,PGF,TGFB1,IRS1,CDKN1A,TGFA,MAPK10,ERBB2,RALGDS,MMP9
Glioblastoma Multiforme Signaling		3.96	2.58	0.151	NaN	RND2,CDKN2A,PIK3C2B,PLCB2,WNT9A,FGFR1,PIK3C2G,FGFR2,RHOH,MYC,FZD4,RHOQ,RND3,PRKCD,IRS1,CDKN1A,RHOU,IGF1R,MRAS,PLCL1,PLCD4,FZD2,WNT11,FZD7
phagosome formation		3.89	2.56	0.164	NaN	RND2,PIK3C2B,PLCB2,FN1,MRC2,FGFR1,PIK3C2G,ITGA5,FGFR2,RHOH,RHOQ,RND3,IRS1,PRKCD,RHOU,PRKCE,PLCL1,PLCD4,PRKD1,ITGA4
Semaphorin Signaling in Neurons		3.89	2.56	0.226	NaN	RND2,CRMP1,FYN,PLXNA1,RHOQ,PAK3,RND3,DPYSL4,RHOU,PAK5,DPYSL5,RHOH
Glioma Invasiveness Signaling		3.81	2.51	0.2	NaN	RND2,PIK3C2B,FGFR1,PIK3C2G,FGFR2,RHOH,RHOQ,RND3,TIMP1,IRS1,MRAS,CD44,RHOU,MMP9
Germ Cell-Sertoli Cell Junction Signaling		3.79	2.5	0.145	NaN	RND2,PIK3C2B,TUBB3,MYO7A,FGFR1,ITGA6,PIK3C2G,FGFR2,MAPK12,RHOH,TUBB2B,CDH2,TUBA1A,RHOQ,RND3,PAK3,TUBB6,SORBS1,TGFB1,IRS1,RHOU,MRAS,MAPK10,PAK5,A2M
Signaling by Rho Family GTPases		3.75	2.48	0.13	NaN	SEPT3,GNB5,RHOH,ARHGEF19,CDH7,PPP1R12B,RHOU,MRAS,ITGA4,RND2,GNG4,PIK3C2B,SEPT5,FGFR1,PIK3C2G,ITGA5,FGFR2,CDC42EP3,ARHGEF17,GNAZ,MAPK12,FOS,CDH2,RHOQ,PAK3,RND3,IRS1,GNAO1,MAPK10,PAK5,PARD3,MSN
Prolactin Signaling		3.53	2.3	0.181	NaN	SOCS3,PIK3C2B,FYN,FGFR1,PIK3C2G,FGFR2,MYC,FOS,IRS1,PRKCD,MRAS,PRKCE,PRLR,TCF7,PRKD1
Reelin Signaling in Neurons		3.53	2.3	0.174	NaN	PIK3C2B,FYN,FGFR1,MAPK8IP2,PIK3C2G,ITGA6,ITGA5,FGFR2,MAPK12,MAPK8IP1,CDK5R1,MAPT,IRS1,MAPK10,DCX,ITGA4
UVB-Induced MAPK Signaling		3.51	2.3	0.197	NaN	PIK3C2B,FGFR1,PIK3C2G,FGFR2,MAPK12,MAPK11,FOS,H3F3A/H3F3B,IRS1,PRKCD,MAPK10,PRKCE,PRKD1
Cardiac Hypertrophy Signaling		3.44	2.24	0.128	NaN	ADRA2B,PLCB2,GNB5,RHOH,MAPK11,TGFB1,RHOU,MRAS,IGF1R,PLCL1,PLCD4,PPP3CA,RND2,GNG4,PIK3C2B,FGFR1,MEF2A,PIK3C2G,CACNA1C,FGFR2,GNAZ,MAPK12,RHOQ,PRKAR2B,RND3,IRS1,GNAO1,MAPK10,ADRA2C,GATA4
RhoGDI Signaling		3.39	2.21	0.139	NaN	RND2,GNG4,GDI1,ARHGDIG,GNB5,ITGA5,ARHGEF17,GNAZ,RHOH,ARHGEF19,CDH2,CDH7,PPP1R12B,RHOQ,RND3,PAK3,GNAO1,RHOU,MRAS,CD44,PAK5,ITGA4,ARHGAP8/PRR5-ARHGAP8,MSN
Human Embryonic Stem Cell Pluripotency		3.37	2.21	0.147	NaN	PIK3C2B,WNT9A,SMAD3,FGFR1,PIK3C2G,SMAD7,FGFR2,BMP5,SOX2,NTRK2,FZD4,ZIC3,TGFB1,IRS1,MRAS,BMP7,FGFRL1,FZD2,WNT11,BMP1,FZD7
ILK Signaling		3.32	2.17	0.133	NaN	RND2,PIK3C2B,FN1,FGFR1,SNAI1,PIK3C2G,VEGFB,FGFR2,MAPK12,RHOH,PGF,NCK2,MYC,PARVB,FOS,RHOQ,RND3,FLNA,FLNC,IRS1,PPP2R2B,RHOU,MAPK10,PPP2R2C,TMSB10/TMSB4X,MMP9
IL-8 Signaling		3.28	2.15	0.132	NaN	PLCB2,GNB5,VEGFB,RHOH,PGF,BCL2,RHOU,MRAS,PRKCE,PRKD1,RND2,GNG4,PIK3C2B,FLT1,FGFR1,PIK3C2G,FGFR2,MAPK12,AZU1,FOS,RHOQ,RND3,IRS1,PRKCD,MAPK10,MMP9
Endothelin-1 Signaling		3.26	2.14	0.134	NaN	PIK3C2B,PLCB2,FGFR1,MAPK15,PIK3C2G,SHC3,FGFR2,GNAZ,MAPK12,MAPK11,MYC,FOS,PRKCD,CASP2,IRS1,GNAO1,GUCY1A2,MRAS,MAPK10,RARRES3,PRKCE,ECE1,PLCL1,PLCD4,PRKD1
Gap Junction Signaling		3.19	2.1	0.137	NaN	PIK3C2B,DBN1,PLCB2,TUBB3,FGFR1,PIK3C2G,FGFR2,DRD2,TUBB2B,TUBA1A,PRKAR2B,PRKG1,DRD1,TUBB6,PRKCD,IRS1,GUCY1A2,MRAS,PRKCE,PLCL1,PLCD4,PRKD1,PPP3CA
Regulation of the Epithelial-Mesenchymal Transition Pathway		3.19	2.1	0.132	NaN	ID2,JAK1,SMAD3,PARD6G,TGFB1,FGF12,MRAS,FZD2,PIK3C2B,JAG2,NOTCH3,WNT9A,FGFR1,FGF9,SNAI1,PIK3C2G,FGFR2,CDH2,FZD4,IRS1,APH1B,FGFRL1,WNT11,MMP9,FZD7
CDK5 Signaling		3.16	2.08	0.162	NaN	LAMA5,PPP1R1B,MAPK15,ITGA6,MAPK12,MAPK11,CDK5R1,LAMC1,NTRK2,PRKAR2B,DRD1,MAPT,PPP2R2B,MRAS,MAPK10,PPP2R2C
Inhibition of Matrix Metalloproteases		3.11	2.04	0.231	NaN	ADAM12,TIMP1,SDC2,MMP16,MMP11,MMP25,A2M,MMP24,MMP9
Glioma Signaling		3.09	2.04	0.155	NaN	CDKN2A,PIK3C2B,CAMK1,CAMK1D,FGFR1,PIK3C2G,FGFR2,CDKN2B,IRS1,PRKCD,CDKN1A,TGFA,MRAS,IGF1R,PRKCE,PRKD1,CAMK2B
Breast Cancer Regulation by Stathmin1		3.08	2.04	0.128	NaN	GNG4,PIK3C2B,PLCB2,TUBB3,CAMK1,CAMK1D,FGFR1,GNB5,PIK3C2G,FGFR2,ARHGEF17,CDK1,TUBB2B,ARHGEF19,PRKAR2B,TUBA1A,TUBB6,PRKCD,IRS1,PPP2R2B,CDKN1A,MRAS,PRKCE,PPP2R2C,PRKD1,CAMK2B
Amyotrophic Lateral Sclerosis Signaling		3.05	2.02	0.153	NaN	PRPH,CAPN5,PIK3C2B,GRIN1,FGFR1,GRIK3,PIK3C2G,VEGFB,CACNA1C,FGFR2,PGF,BCL2,GRIK4,IRS1,PPP3CA,GRIA3,GRIK1
Virus Entry via Endocytic Pathways		3.02	2.02	0.157	NaN	PIK3C2B,FYN,FGFR1,PIK3C2G,ITGA6,ITGA5,FGFR2,DNM1,FLNC,FLNA,IRS1,PRKCD,MRAS,PRKCE,PRKD1,ITGA4
UVA-Induced MAPK Signaling		3.02	2.02	0.157	NaN	PIK3C2B,PARP6,PLCB2,FGFR1,PIK3C2G,FGFR2,MAPK12,MAPK11,FOS,IRS1,MRAS,MAPK10,PLCL1,PLCD4,SMPD3,PARP14
CREB Signaling in Neurons		3	2.02	0.13	NaN	GNG4,GRIN1,PIK3C2B,PLCB2,FGFR1,GRIK3,PIK3C2G,GNB5,FGFR2,GRM4,GNAZ,PRKAR2B,GRIK4,PRKCD,IRS1,GNAO1,MRAS,PRKCE,PLCL1,PLCD4,PRKD1,GRIK1,GRIA3,CAMK2B
P2Y Purigenic Receptor Signaling Pathway		3	2.02	0.144	NaN	GNG4,PIK3C2B,PLCB2,FGFR1,PIK3C2G,GNB5,FGFR2,MYC,P2RY2,FOS,PRKAR2B,P2RY6,IRS1,PRKCD,MRAS,PRKCE,PLCL1,PLCD4,PRKD1
Role of NANOG in Mammalian Embryonic Stem Cell Pluripotency		3	2.02	0.148	NaN	PIK3C2B,JAK1,WNT9A,FGFR1,PIK3C2G,FGFR2,BMP5,SOX2,LIFR,FZD4,IRS1,MRAS,BMP7,FZD2,GATA4,WNT11,BMP1,FZD7
Ovarian Cancer Signaling		2.93	1.96	0.139	NaN	CDKN2A,PIK3C2B,WNT9A,FGF9,FGFR1,PIK3C2G,VEGFB,FGFR2,BCL2,PGF,ARRB1,FZD4,PRKAR2B,IRS1,MRAS,CD44,FZD2,WNT11,MMP9,FZD7
Inhibition of Angiogenesis by TSP1		2.88	1.92	0.235	NaN	FYN,SDC2,TGFB1,MAPK10,GUCY1A2,MAPK12,MAPK11,MMP9
HIF1α Signaling		2.87	1.92	0.148	NaN	PIK3C2B,MMP16,FGFR1,MAPK15,PIK3C2G,VEGFB,FGFR2,MMP25,MAPK12,MAPK11,MMP24,PGF,IRS1,MRAS,MAPK10,MMP11,MMP9
UVC-Induced MAPK Signaling		2.87	1.92	0.214	NaN	FOS,PRKCD,MAPK10,MRAS,PRKCE,MAPK12,MAPK11,SMPD3,PRKD1
Sertoli Cell-Sertoli Cell Junction Signaling		2.85	1.91	0.129	NaN	TUBB3,MYO7A,CLDN19,ITGA5,MAPK12,MAPK11,TUBB2B,CLDN23,TUBA1A,PRKAR2B,PRKG1,TUBB6,CLDN8,SORBS1,CLDN1,MAP3K20,GUCY1A2,MRAS,MAPK10,NECTIN1,MAGI2,A2M,ITGA4
Mouse Embryonic Stem Cell Pluripotency		2.84	1.91	0.151	NaN	PIK3C2B,ID2,JAK1,FGFR1,PIK3C2G,FGFR2,MAPK12,MAPK11,SOX2,MYC,LIFR,FZD4,IRS1,MRAS,FZD2,FZD7
Bladder Cancer Signaling		2.82	1.9	0.161	NaN	CDKN2A,MMP16,FGF9,VEGFB,MMP25,MMP24,PGF,MYC,FGF12,CDKN1A,MRAS,MMP11,ERBB2,MMP9
Rac Signaling		2.79	1.88	0.145	NaN	PIK3C2B,FGFR1,PIK3C2G,ITGA5,FGFR2,CDK5R1,ANK1,MCF2L,CYFIP2,PAK3,IRS1,MRAS,CD44,SH3RF1,PAK5,PARD3,ITGA4
HER-2 Signaling in Breast Cancer		2.77	1.87	0.159	NaN	PIK3C2B,FGFR1,PIK3C2G,FGFR2,PARD6G,AREG,IRS1,PRKCD,CDKN1A,MRAS,PRKCE,ERBB2,PARD3,PRKD1
Myc Mediated Apoptosis Signaling		2.73	1.84	0.171	NaN	CDKN2A,MYC,PIK3C2B,IRS1,FGFR1,PIK3C2G,MAPK10,MRAS,IGF1R,FGFR2,MAPK12,BCL2
Renin-Angiotensin Signaling		2.67	1.79	0.142	NaN	PIK3C2B,FGFR1,PIK3C2G,FGFR2,SHC3,MAPK12,MAPK11,FOS,PRKAR2B,PAK3,PRKCD,IRS1,MRAS,MAPK10,PRKCE,PAK5,PRKD1
Gαi Signaling		2.67	1.79	0.142	NaN	GNG4,ADRA2B,PTGER3,RGS7,SSTR3,RALB,GNB5,GRM4,RGS12,DRD2,HRH3,PRKAR2B,NPR3,HTR1E,MRAS,ADRA2C,RALGDS
Role of Macrophages, Fibroblasts and Endothelial Cells in Rheumatoid Arthritis		2.66	1.79	0.11	NaN	SOCS3,PLCB2,FN1,VEGFB,CEBPG,PGF,MYC,TGFB1,DKK3,MRAS,PRKCE,PLCL1,FZD2,PLCD4,IL1RAP,PRKD1,PPP3CA,ADAMTS4,CAMK2B,PIK3C2B,WNT9A,FGFR1,DAAM1,PIK3C2G,FGFR2,IL16,FOS,FZD4,PRKCD,IRS1,GNAO1,NFATC2,WNT11,FZD7
Cholecystokinin/Gastrin-mediated Signaling		2.62	1.76	0.149	NaN	RND2,PLCB2,MEF2A,EPHA4,MAPK12,RHOH,FOS,RHOQ,RND3,PRKCD,MRAS,MAPK10,RHOU,PRKCE,PRKD1
Ephrin B Signaling		2.57	1.72	0.164	NaN	GNG4,NCK2,EFNB2,KALRN,EPHB2,CXCR4,VAV3,GNAO1,MRAS,GNB5,EFNB3,GNAZ
Role of Osteoblasts, Osteoclasts and Chondrocytes in Rheumatoid Arthritis		2.56	1.71	0.116	NaN	BCL2,TGFB1,DKK3,FZD2,IL1RAP,ALPL,PPP3CA,BMP1,ADAMTS4,PIK3C2B,WNT9A,FGFR1,DLX5,PIK3C2G,ITGA5,FGFR2,MAPK12,BMP5,COL1A1,FOS,FZD4,IRS1,MAPK10,NFATC2,BMP7,WNT11,FZD7
Aldosterone Signaling in Epithelial Cells		2.54	1.7	0.127	NaN	PIK3C2B,PLCB2,ASIC2,SGK1,FGFR1,DNAJC6,PIK3C2G,HSPB8,FGFR2,DNAJC1,DNAJC15,HSPA12A,SCNN1G,PRKCD,IRS1,HSPB11,PRKCE,PLCL1,SCNN1B,PLCD4,PRKD1
Thrombopoietin Signaling		2.5	1.67	0.169	NaN	MYC,PIK3C2B,FOS,IRS1,PRKCD,FGFR1,PIK3C2G,MRAS,FGFR2,PRKCE,PRKD1
Actin Nucleation by ARP-WASP Complex		2.5	1.67	0.179	NaN	RND2,NCK2,PPP1R12B,RHOQ,RND3,RHOU,MRAS,ITGA5,RHOH,ITGA4
Netrin Signaling		2.48	1.66	0.205	NaN	NCK2,PRKG1,PRKAR2B,UNC5A,ABLIM3,UNC5D,NFATC2,PPP3CA
HGF Signaling		2.47	1.65	0.139	NaN	CDKN2A,PIK3C2B,FGFR1,PIK3C2G,ITGA5,FGFR2,MAPK12,FOS,IRS1,PRKCD,CDKN1A,MRAS,MAPK10,PRKCE,PRKD1,ITGA4
Glutamate Receptor Signaling		2.44	1.63	0.175	NaN	GRIN1,SLC1A6,HOMER2,GRIK4,GRIK3,SLC1A1,GRM4,HOMER3,GRIK1,GRIA3
LPS-stimulated MAPK Signaling		2.41	1.61	0.151	NaN	PIK3C2B,FGFR1,PIK3C2G,FGFR2,MAPK12,MAPK11,FOS,IRS1,PRKCD,MRAS,MAPK10,PRKCE,PRKD1
Gαq Signaling		2.39	1.59	0.125	NaN	RND2,GNG4,PIK3C2B,PLCB2,FGFR1,RGS7,PIK3C2G,GNB5,FGFR2,RHOH,RHOQ,RND3,PRKCD,IRS1,RHOU,MRAS,PRKCE,NFATC2,PRKD1,PPP3CA
TGF-β Signaling		2.37	1.58	0.149	NaN	SMAD3,SMAD7,MAPK12,MAPK11,INHBB,TGIF1,BCL2,FOS,ZNF423,TGFB1,MRAS,BMP7,SERPINE1
VEGF Family Ligand-Receptor Interactions		2.33	1.54	0.148	NaN	PIK3C2B,FLT1,FGFR1,PIK3C2G,FGFR2,VEGFB,PGF,FOS,IRS1,PRKCD,MRAS,PRKCE,PRKD1
CCR3 Signaling in Eosinophils		2.3	1.53	0.131	NaN	GNG4,PIK3C2B,PLCB2,FGFR1,PIK3C2G,GNB5,FGFR2,MAPK12,MAPK11,PPP1R12B,PAK3,IRS1,PRKCD,MRAS,PRKCE,PAK5,PRKD1
CCR5 Signaling in Macrophages		2.3	1.53	0.159	NaN	GNG4,FOS,PRKCD,MAPK10,MRAS,GNB5,PRKCE,MAPK12,CCL3,MAPK11,PRKD1
FAK Signaling		2.29	1.52	0.141	NaN	CAPN5,PIK3C2B,FYN,ASAP1,FGFR1,PIK3C2G,ITGA5,FGFR2,PAK3,IRS1,MRAS,PAK5,TNS1,ITGA4
Sphingosine-1-phosphate Signaling		2.21	1.47	0.131	NaN	RND2,PIK3C2B,PLCB2,FGFR1,ACER2,PIK3C2G,FGFR2,RHOH,RHOQ,RND3,IRS1,CASP2,RHOU,PLCL1,PLCD4,SMPD3
G-Protein Coupled Receptor Signaling		2.21	1.47	0.107	NaN	ADRA2B,FYN,PLCB2,PTGER3,RAPGEF4,RGS12,HRH3,SYNGAP1,DRD1,HTR1E,MRAS,PRKCE,CAMK2B,PIK3C2B,PDE9A,FGFR1,RGS7,SSTR3,PIK3C2G,FGFR2,GRM4,DRD2,DUSP9,PRKAR2B,NPR3,IRS1,GNAO1,PTH1R,ADRA2C
HMGB1 Signaling		2.21	1.47	0.128	NaN	RND2,PIK3C2B,FGFR1,PIK3C2G,FGFR2,MAPK12,RHOH,MAPK11,FOS,RHOQ,RND3,TGFB1,IRS1,RHOU,MRAS,MAPK10,SERPINE1
Melatonin Signaling		2.2	1.47	0.155	NaN	PLCB2,PRKAR2B,RORA,PRKCD,GNAO1,PRKCE,PLCL1,PLCD4,RORB,PRKD1,CAMK2B
Chemokine Signaling		2.2	1.47	0.155	NaN	FOS,PLCB2,PPP1R12B,CAMK1,CAMK1D,CXCR4,PIK3C2G,MRAS,MAPK12,MAPK11,CAMK2B
Growth Hormone Signaling		2.2	1.47	0.148	NaN	PIK3C2B,SOCS3,FOS,IRS1,PRKCD,FGFR1,PIK3C2G,IGF1R,FGFR2,PRKCE,A2M,PRKD1
ErbB4 Signaling		2.16	1.44	0.153	NaN	PIK3C2B,YAP1,IRS1,PRKCD,FGFR1,PIK3C2G,MRAS,APH1B,FGFR2,PRKCE,PRKD1
Paxillin Signaling		2.16	1.44	0.133	NaN	PIK3C2B,FGFR1,PIK3C2G,ITGA6,ITGA5,FGFR2,MAPK12,MAPK11,NCK2,PAK3,IRS1,MRAS,MAPK10,PAK5,ITGA4
Nitric Oxide Signaling in the Cardiovascular System		2.16	1.44	0.133	NaN	PIK3C2B,FLT1,FGFR1,PIK3C2G,VEGFB,FGFR2,CACNA1C,PGF,PRKAR2B,PRKG1,IRS1,PRKCD,GUCY1A2,PRKCE,PRKD1
PCP pathway		2.12	1.42	0.159	NaN	FZD4,SDC2,WNT9A,DAAM1,MAPK10,SDC3,MAPK12,FZD2,WNT11,FZD7
Wnt/β-catenin Signaling		2.12	1.42	0.118	NaN	SOX4,CDKN2A,AXIN2,PPARD,WNT9A,SOX2,MYC,CDH2,FZD4,DKK3,TGFB1,PPP2R2B,GNAO1,CD44,PPP2R2C,KREMEN2,FZD2,WNT11,SOX5,FZD7
Salvage Pathways of Pyrimidine Ribonucleotides		2.12	1.42	0.14	NaN	CDK18,SGK1,CDK1,APOBEC3G,PRKX,APOBEC3F,PAK3,PIM1,PRKCD,PRKCE,AK4,PAK5,AK9
IL-3 Signaling		2.11	1.42	0.145	NaN	PIK3C2B,FOS,JAK1,IRS1,PRKCD,FGFR1,PIK3C2G,MRAS,FGFR2,PRKCE,PPP3CA,PRKD1
Production of Nitric Oxide and Reactive Oxygen Species in Macrophages		2.09	1.4	0.114	NaN	RND2,PPARA,PIK3C2B,JAK1,FGFR1,PIK3C2G,FGFR2,MAPK12,MAPK11,RHOH,FOS,APOA1,RHOQ,RND3,PRKCD,IRS1,PPP2R2B,RHOU,MAPK10,PRKCE,PPP2R2C,PRKD1
Oleate Biosynthesis II (Animals)		2.09	1.4	0.308	NaN	SCD5,FADS2,PTPRT,FADS1
Type II Diabetes Mellitus Signaling		2.05	1.37	0.126	NaN	SOCS3,PIK3C2B,FGFR1,PIK3C2G,FGFR2,MAPK12,PRKCD,IRS1,MAPK10,ABCC8,PRKCE,ACSL4,MAFA,SMPD3,PRKD1,ACSL1
IL-17 Signaling		2.03	1.36	0.141	NaN	PIK3C2B,JAK1,TIMP1,IRS1,FGFR1,PIK3C2G,MAPK10,MRAS,FGFR2,MUC5B,MAPK12,MAPK11
IGF-1 Signaling		2.03	1.36	0.132	NaN	SOCS3,PIK3C2B,JAK1,FGFR1,PIK3C2G,FGFR2,IGFBP5,IGFBP2,GRB10,FOS,PRKAR2B,IRS1,MRAS,IGF1R
Integrin Signaling		2.02	1.36	0.11	NaN	RND2,CAPN5,FYN,PIK3C2B,TSPAN5,ASAP1,FGFR1,RALB,PIK3C2G,ITGA6,ITGA5,FGFR2,RHOH,NCK2,PARVB,PPP1R12B,RHOQ,RND3,PAK3,IRS1,RHOU,MRAS,PAK5,ITGA4
NF-κB Activation by Viruses		1.99	1.33	0.14	NaN	PIK3C2B,IRS1,PRKCD,FGFR1,PIK3C2G,ITGA6,MRAS,ITGA5,FGFR2,PRKCE,PRKD1,ITGA4
cAMP-mediated signaling		1.98	1.32	0.109	NaN	ADRA2B,AKAP5,CAMK1,CAMK1D,PDE9A,PTGER3,RGS7,SSTR3,GRM4,RAPGEF4,DRD2,RGS12,HRH3,AKAP2,DUSP9,PRKAR2B,DRD1,NPR3,HTR1E,PTH1R,GNAO1,ADRA2C,PPP3CA,CAMK2B
nNOS Signaling in Neurons		1.97	1.32	0.17	NaN	NOS1AP,CAPN5,GRIN1,PRKCD,DLG2,PRKCE,PPP3CA,PRKD1
Notch Signaling		1.97	1.32	0.184	NaN	NOTCH3,JAG2,MFNG,MAML3,APH1B,DLL3,HEY2
Insulin Receptor Signaling		1.96	1.32	0.121	NaN	FYN,SOCS3,PIK3C2B,ASIC2,JAK1,SGK1,FGFR1,PIK3C2G,FGFR2,GRB10,SCNN1G,PRKAR2B,RHOQ,INPP5J,IRS1,MRAS,SCNN1B
Fc Epsilon RI Signaling		1.95	1.32	0.126	NaN	PIK3C2B,FYN,FGFR1,PIK3C2G,FGFR2,MAPK12,MAPK11,INPP5J,VAV3,IRS1,PRKCD,MRAS,MAPK10,PRKCE,PRKD1
PTEN Signaling		1.95	1.32	0.126	NaN	FLT1,FGFR1,ITGA5,FGFR2,BCL2,NTRK2,INPP5J,FOXO6,CDKN1A,MRAS,IGF1R,FGFRL1,MAGI2,BCL2L11,ITGA4
ERK/MAPK Signaling		1.94	1.31	0.111	NaN	FYN,PIK3C2B,FGFR1,PIK3C2G,ITGA5,FGFR2,RAPGEF4,DUSP2,MYC,FOS,DUSP9,PRKAR2B,H3F3A/H3F3B,PAK3,PRKCD,IRS1,PPP2R2B,MRAS,PRKCE,PPP2R2C,PAK5,ITGA4
p70S6K Signaling		1.92	1.3	0.122	NaN	PIK3C2B,PLCB2,JAK1,FGFR1,PIK3C2G,FGFR2,MAPT,IRS1,PRKCD,PPP2R2B,MRAS,PRKCE,PPP2R2C,PLCL1,PLCD4,PRKD1
Granulocyte Adhesion and Diapedesis		1.91	1.29	0.113	NaN	CXCR4,MMP16,CLDN19,ITGA6,ITGA5,SDC3,MMP25,CCL3,HRH3,MMP24,CLDN23,CLDN8,SDC2,CLDN1,CCL3L3,MMP11,IL1RAP,MMP9,ITGA4,MSN
p53 Signaling		1.86	1.25	0.126	NaN	CDKN2A,WT1,PIK3C2B,TP53INP1,BBC3,TP63,GADD45A,TP73,IRS1,FGFR1,CDKN1A,PIK3C2G,FGFR2,BCL2
Erythropoietin Signaling		1.86	1.25	0.139	NaN	PIK3C2B,SOCS3,FOS,IRS1,PRKCD,FGFR1,PIK3C2G,MRAS,FGFR2,PRKCE,PRKD1
Agrin Interactions at Neuromuscular Junction		1.85	1.24	0.145	NaN	LAMC1,PAK3,ITGA6,MAPK10,MRAS,ITGA5,PAK5,ERBB2,MAPK12,ITGA4
Adipogenesis pathway		1.84	1.23	0.119	NaN	CDKN2A,TXNIP,SMAD3,FGFR1,FGFR2,FBXW7,RBP1,ZNF423,FZD4,TGFB1,HDAC11,BMP7,FGFRL1,TCF7,FZD2,FZD7
PAK Signaling		1.83	1.23	0.129	NaN	PIK3C2B,FGFR1,PIK3C2G,FGFR2,ITGA5,MAPK12,NCK2,PAK3,IRS1,MRAS,MAPK10,PAK5,ITGA4
Synaptic Long Term Depression		1.82	1.22	0.116	NaN	PLCB2,GRM4,GNAZ,PRKG1,PRKCD,PPP2R2B,GNAO1,GUCY1A2,MRAS,IGF1R,RARRES3,PRKCE,PPP2R2C,PLCL1,PLCD4,PRKD1,GRIA3
Huntington's Disease Signaling		1.8	1.21	0.104	NaN	CAPN5,GNG4,PIK3C2B,PLCB2,SGK1,PACSIN1,SH3GL3,FGFR1,GNB5,PIK3C2G,FGFR2,RCOR2,STX1A,SNAP25,CDK5R1,DNM1,CPLX2,PRKCD,IRS1,HDAC11,CASP2,IGF1R,PRKCE,PRKD1,NAPB
Renal Cell Carcinoma Signaling		1.78	1.2	0.136	NaN	PIK3C2B,FOS,PAK3,TGFB1,IRS1,FGFR1,PIK3C2G,MRAS,TGFA,FGFR2,PAK5
Sperm Motility		1.77	1.19	0.12	NaN	CACNA1G,PLCB2,PRKG1,PRKAR2B,PRKCD,NPPC,CACNA1H,MRAS,GUCY1A2,RARRES3,PRKCE,PLCL1,PLCD4,PRKD1,PTK7
Factors Promoting Cardiogenesis in Vertebrates		1.77	1.19	0.13	NaN	FZD4,TGFB1,PRKCD,PRKCE,BMP7,FZD2,BMP5,PRKD1,GATA4,WNT11,FZD7,BMP1
Amyloid Processing		1.76	1.19	0.157	NaN	CAPN5,PRKAR2B,MAPT,APH1B,PRKCE,MAPK12,MAPK11,CDK5R1
Parkinson's Signaling		1.75	1.18	0.25	NaN	SEPT5,GPR37,MAPK12,MAPK11
IL-22 Signaling		1.75	1.18	0.208	NaN	SOCS3,JAK1,MAPK10,MAPK12,MAPK11
Ceramide Signaling		1.74	1.17	0.129	NaN	PIK3C2B,FOS,IRS1,FGFR1,PPP2R2B,PIK3C2G,MRAS,FGFR2,PPP2R2C,CERK,SMPD3,BCL2
Chronic Myeloid Leukemia Signaling		1.73	1.17	0.125	NaN	CDKN2A,PIK3C2B,MECOM,FGFR1,SMAD3,PIK3C2G,FGFR2,MYC,TGFB1,IRS1,HDAC11,CDKN1A,MRAS
PEDF Signaling		1.68	1.13	0.131	NaN	PIK3C2B,IRS1,FGFR1,PIK3C2G,MRAS,FGFR2,DOCK3,MAPK12,TCF7,MAPK11,BCL2
Role of JAK family kinases in IL-6-type Cytokine Signaling		1.67	1.13	0.2	NaN	SOCS3,JAK1,MAPK10,MAPK12,MAPK11
mTOR Signaling		1.67	1.13	0.106	NaN	RND2,PIK3C2B,ULK1,FGFR1,PIK3C2G,VEGFB,FGFR2,PRR5L,RHOH,PGF,RHOQ,RND3,PRKCD,IRS1,PPP2R2B,RHOU,MRAS,PRKCE,PPP2R2C,PRKD1,ARHGAP8/PRR5-ARHGAP8
FcγRIIB Signaling in B Lymphocytes		1.67	1.13	0.151	NaN	PIK3C2B,IRS1,FGFR1,PIK3C2G,MAPK10,MRAS,FGFR2,MAPK12
γ-linolenate Biosynthesis II (Animals)		1.66	1.12	0.235	NaN	FADS2,ACSL4,ACSL1,FADS1
Dermatan Sulfate Degradation (Metazoa)		1.66	1.12	0.235	NaN	IDS,CD44,FGFRL1,CEMIP
Phospholipase C Signaling		1.64	1.11	0.101	NaN	RND2,GNG4,FYN,PLCB2,RALB,MEF2A,GNB5,ITGA5,ARHGEF17,RHOH,ARHGEF19,RHOQ,PPP1R12B,RND3,HDAC11,PRKCD,RHOU,MRAS,PRKCE,NFATC2,PRKD1,PPP3CA,RALGDS,ITGA4
Pyridoxal 5'-phosphate Salvage Pathway		1.63	1.1	0.141	NaN	CDK18,PRKX,PAK3,PIM1,SGK1,PRKCD,PRKCE,PAK5,CDK1
AMPK Signaling		1.63	1.1	0.106	NaN	PBRM1,ADRA2B,PFKFB3,PIK3C2B,ULK1,FGFR1,PIK3C2G,FGFR2,MAPK12,MAPK11,SMARCD3,PRKAR2B,FOXO6,IRS1,PPP2R2B,CDKN1A,MRAS,AK4,ADRA2C,PPP2R2C
Acetate Conversion to Acetyl-CoA		1.63	1.1	0.5	NaN	ACSS3,ACSL1
Histidine Degradation VI		1.62	1.1	0.3	NaN	MICAL1,HAL,CYP4F11
Antiproliferative Role of Somatostatin Receptor 2		1.62	1.1	0.133	NaN	GNG4,PIK3C2B,IRS1,FGFR1,CDKN1A,PIK3C2G,MRAS,GNB5,GUCY1A2,FGFR2
Calcium Signaling		1.61	1.09	0.107	NaN	AKAP5,GRIN1,CAMK1,TP63,CAMK1D,MEF2A,SLC8A2,TRPC6,ATP2B2,PRKAR2B,CHRNB2,HDAC11,NFATC2,RCAN3,TPM4,PPP3CA,GRIK1,GRIA3,CAMK2B
Synaptic Long Term Potentiation		1.59	1.08	0.117	NaN	GRIN1,PLCB2,CACNA1C,GRM4,PRKAR2B,PRKCD,MRAS,PRKCE,PLCL1,PLCD4,PRKD1,PPP3CA,CAMK2B,GRIA3
IL-9 Signaling		1.58	1.08	0.156	NaN	PIK3C2B,SOCS3,JAK1,IRS1,FGFR1,PIK3C2G,FGFR2
Melanoma Signaling		1.58	1.08	0.145	NaN	CDKN2A,PIK3C2B,IRS1,FGFR1,CDKN1A,PIK3C2G,MRAS,FGFR2
T Cell Receptor Signaling		1.58	1.08	0.119	NaN	PIK3C2B,FYN,FGFR1,PIK3C2G,FGFR2,FOS,PTPRH,VAV3,PAG1,IRS1,MRAS,NFATC2,PPP3CA
BMP signaling pathway		1.58	1.08	0.132	NaN	ZNF423,PRKAR2B,MAPK10,MRAS,SMAD7,BMP7,MAPK12,MAPK11,BMP5,BMP1
fMLP Signaling in Neutrophils		1.57	1.07	0.116	NaN	GNG4,PIK3C2B,PLCB2,FGFR1,PIK3C2G,GNB5,FGFR2,IRS1,PRKCD,MRAS,PRKCE,NFATC2,PRKD1,PPP3CA
IL-17A Signaling in Airway Cells		1.54	1.05	0.13	NaN	PIK3C2B,JAK1,IRS1,FGFR1,PIK3C2G,MAPK10,FGFR2,MUC5B,MAPK12,MAPK11
Neuregulin Signaling		1.54	1.05	0.125	NaN	MYC,PRKCD,MRAS,TGFA,ITGA5,PRKCE,ERBB2,PRKD1,CDK5R1,ITGA4,AREG
Natural Killer Cell Signaling		1.54	1.05	0.115	NaN	PIK3C2B,FYN,FGFR1,PIK3C2G,FGFR2,INPP5J,PAK3,VAV3,IRS1,PRKCD,MRAS,PRKCE,PAK5,PRKD1
GABA Receptor Signaling		1.52	1.04	0.134	NaN	DNM1,GABRB3,KCNN1,GPR37,MRAS,KCNQ3,KCNH2,GABRD,ALDH5A1
Wnt/Ca+ pathway		1.5	1.02	0.14	NaN	PLCB2,FZD4,NFATC2,PLCL1,FZD2,PLCD4,PPP3CA,FZD7
Role of NFAT in Regulation of the Immune Response		1.5	1.02	0.104	NaN	GNG4,AKAP5,FYN,PIK3C2B,PLCB2,FGFR1,PIK3C2G,MEF2A,GNB5,FGFR2,GNAZ,FOS,IRS1,GNAO1,MRAS,NFATC2,RCAN3,GATA4,PPP3CA
EGF Signaling		1.48	1.01	0.132	NaN	PIK3C2B,FOS,JAK1,IRS1,FGFR1,PIK3C2G,FGFR2,MAPK12,MAPK11
Regulation of IL-2 Expression in Activated and Anergic T Lymphocytes		1.48	1.01	0.127	NaN	FYN,FOS,TGFB1,VAV3,SMAD3,MAPK10,MRAS,NFATC2,MAPK12,PPP3CA
IL-1 Signaling		1.45	0.982	0.121	NaN	GNG4,FOS,PRKAR2B,GNAO1,MAPK10,MRAS,GNB5,GNAZ,MAPK12,MAPK11,IL1RAP
Dopamine-DARPP32 Feedback in cAMP Signaling		1.43	0.964	0.105	NaN	GRIN1,PLCB2,PPP1R1B,CACNA1C,DRD2,PRKAR2B,PRKG1,DRD1,PRKCD,PPP2R2B,GUCY1A2,PRKCE,PPP2R2C,PLCL1,PLCD4,PRKD1,PPP3CA
Glucocorticoid Receptor Signaling		1.42	0.961	0.0941	NaN	PBRM1,JAK1,SGK1,SMAD3,CCL3,MAPK11,BCL2,PGR,AR,TGFB1,MRAS,SERPINE1,PPP3CA,PIK3C2B,CDKN1C,FGFR1,PIK3C2G,FGFR2,MAPK12,SMARCD3,FOS,IRS1,CDKN1A,MAPK10,NFATC2,NRIP1,A2M
Macropinocytosis Signaling		1.41	0.955	0.123	NaN	PIK3C2B,IRS1,PRKCD,FGFR1,PIK3C2G,MRAS,ITGA5,FGFR2,PRKCE,PRKD1
IL-6 Signaling		1.41	0.955	0.11	NaN	SOCS3,PIK3C2B,FGFR1,PIK3C2G,FGFR2,MAPK12,MAPK11,COL1A1,FOS,IRS1,MRAS,MAPK10,A2M,IL1RAP
SAPK/JNK Signaling		1.4	0.95	0.115	NaN	PIK3C2B,GADD45A,IRS1,FGFR1,MAPK8IP2,MAP3K20,PIK3C2G,MAPK10,MRAS,FGFR2,MAPK12,MAPK8IP1
GNRH Signaling		1.36	0.912	0.109	NaN	DNM1,FOS,PLCB2,PRKAR2B,PAK3,PRKCD,MAPK10,MRAS,PRKCE,PAK5,MAPK12,MAPK11,PRKD1,CAMK2B
JAK/Stat Signaling		1.35	0.904	0.12	NaN	PIK3C2B,SOCS3,FOS,JAK1,IRS1,FGFR1,CDKN1A,PIK3C2G,MRAS,FGFR2
Basal Cell Carcinoma Signaling		1.34	0.901	0.125	NaN	FZD4,GLI3,WNT9A,BMP7,FZD2,BMP5,WNT11,FZD7,BMP1
Hereditary Breast Cancer Signaling		1.34	0.897	0.106	NaN	PBRM1,PIK3C2B,FGFR1,PIK3C2G,FGFR2,CDK1,FANCL,SMARCD3,FANCB,GADD45A,HDAC11,IRS1,CDKN1A,MRAS,SLC19A1
eNOS Signaling		1.32	0.88	0.103	NaN	PIK3C2B,FLT1,FGFR1,PIK3C2G,VEGFB,FGFR2,PGF,LPAR6,CCNA1,PRKAR2B,PRKG1,IRS1,PRKCD,GUCY1A2,PRKCE,PRKD1
GM-CSF Signaling		1.31	0.877	0.123	NaN	PIK3C2B,PIM1,IRS1,FGFR1,PIK3C2G,MRAS,FGFR2,PPP3CA,CAMK2B
Leptin Signaling in Obesity		1.29	0.859	0.118	NaN	PIK3C2B,SOCS3,PLCB2,PRKAR2B,IRS1,FGFR1,PIK3C2G,FGFR2,PLCL1,PLCD4
CNTF Signaling		1.28	0.848	0.127	NaN	LIFR,PIK3C2B,JAK1,IRS1,FGFR1,PIK3C2G,MRAS,FGFR2
G Protein Signaling Mediated by Tubby		1.26	0.836	0.156	NaN	GNG4,PLCB2,MRAS,GNB5,TUB
TR/RXR Activation		1.25	0.836	0.112	NaN	KLF9,PIK3C2B,DIO1,IRS1,FGFR1,PIK3C2G,SLC16A2,FGFR2,THRA,SYT12,THRSP
IL-12 Signaling and Production in Macrophages		1.25	0.836	0.103	NaN	PIK3C2B,FGFR1,MAF,PIK3C2G,FGFR2,MAPK12,MAPK11,FOS,APOA1,TGFB1,IRS1,PRKCD,MAPK10,PRKCE,PRKD1
RhoA Signaling		1.25	0.836	0.107	NaN	PLXNA1,SEPT5,NGEF,LPAR6,PPP1R12B,RND3,SEPT3,PLEKHG5,IGF1R,CDC42EP3,SEMA3F,ARHGAP8/PRR5-ARHGAP8,MSN
Role of Tissue Factor in Cancer		1.25	0.836	0.107	NaN	PIK3C2B,FYN,PDIA2,FGFR1,PIK3C2G,ITGA6,FGFR2,MAPK12,F3,MAPK11,ARRB1,IRS1,MRAS
Endometrial Cancer Signaling		1.24	0.836	0.125	NaN	MYC,PIK3C2B,IRS1,FGFR1,PIK3C2G,MRAS,FGFR2,ERBB2
Cell Cycle: G1/S Checkpoint Regulation		1.24	0.836	0.125	NaN	CDKN2A,MYC,TGFB1,HDAC11,BMI1,SMAD3,CDKN1A,CDKN2B
IL-2 Signaling		1.24	0.836	0.125	NaN	PIK3C2B,FOS,JAK1,IRS1,FGFR1,PIK3C2G,MRAS,FGFR2
Role of p14/p19ARF in Tumor Suppression		1.22	0.817	0.14	NaN	CDKN2A,PIK3C2B,IRS1,FGFR1,PIK3C2G,FGFR2
IL-15 Signaling		1.22	0.817	0.118	NaN	PIK3C2B,JAK1,IRS1,FGFR1,PIK3C2G,MRAS,FGFR2,MAPK12,MAPK11
Superpathway of Inositol Phosphate Compounds		1.2	0.8	0.0938	NaN	FYN,SOCS3,PIK3C2B,PLCB2,PPP1R1B,PTPN13,FGFR1,PIK3C2G,FGFR2,DUSP2,PTPRH,ATP1A1,INPP5J,PIP4P2,IRS1,PPM1H,ERBB2,IP6K2,ALPL,PLCD4,PPP3CA
Non-Small Cell Lung Cancer Signaling		1.19	0.796	0.117	NaN	CDKN2A,PIK3C2B,IRS1,FGFR1,PIK3C2G,MRAS,TGFA,FGFR2,ERBB2
Dopamine Receptor Signaling		1.19	0.796	0.117	NaN	PRKAR2B,DRD1,PPP1R1B,DDC,PPP2R2B,NCS1,PPP2R2C,DRD2,QDPR
RANK Signaling in Osteoclasts		1.18	0.784	0.109	NaN	PIK3C2B,FOS,IRS1,FGFR1,PIK3C2G,MAPK10,NFATC2,FGFR2,MAPK12,MAPK11,PPP3CA
Relaxin Signaling		1.17	0.784	0.1	NaN	GNG4,PIK3C2B,PDE9A,FGFR1,PIK3C2G,GNB5,FGFR2,GNAZ,FOS,PRKAR2B,IRS1,GNAO1,GUCY1A2,MRAS,MMP9
Estrogen-mediated S-phase Entry		1.16	0.784	0.167	NaN	MYC,CCNA1,CDKN1A,CDK1
VDR/RXR Activation		1.16	0.784	0.115	NaN	WT1,GADD45A,PPARD,PRKCD,CDKN1A,PRKCE,IGFBP5,HR,PRKD1
CD40 Signaling		1.16	0.784	0.115	NaN	PIK3C2B,FOS,IRS1,FGFR1,PIK3C2G,MAPK10,FGFR2,MAPK12,MAPK11
Cyclins and Cell Cycle Regulation		1.16	0.784	0.115	NaN	CDKN2A,CCNA1,TGFB1,HDAC11,PPP2R2B,CDKN1A,PPP2R2C,CDKN2B,CDK1
Role of JAK2 in Hormone-like Cytokine Signaling		1.16	0.784	0.147	NaN	SOCS3,JAK1,IRS1,SH2B3,PRLR
FGF Signaling		1.15	0.781	0.111	NaN	PIK3C2B,FGF9,IRS1,FGFR1,FGF12,PIK3C2G,FGFR2,FGFRL1,MAPK12,MAPK11
PDGF Signaling		1.15	0.781	0.111	NaN	MYC,PIK3C2B,FOS,JAK1,INPP5J,IRS1,FGFR1,PIK3C2G,MRAS,FGFR2
Role of IL-17A in Arthritis		1.15	0.778	0.119	NaN	PIK3C2B,IRS1,FGFR1,PIK3C2G,MAPK10,FGFR2,MAPK12,MAPK11
Agranulocyte Adhesion and Diapedesis		1.15	0.777	0.0952	NaN	FN1,CXCR4,MMP16,CLDN19,ITGA6,ITGA5,MMP25,CCL3,MMP24,CLDN23,PODXL2,CLDN8,CLDN1,CCL3L3,MMP11,MMP9,ITGA4,MSN
Pregnenolone Biosynthesis		1.14	0.774	0.286	NaN	MICAL1,CYP4F11
Regulation of Actin-based Motility by Rho		1.13	0.767	0.11	NaN	RND2,PPP1R12B,RHOQ,PAK3,RND3,RHOU,ITGA5,PAK5,RHOH,ITGA4
RAR Activation		1.13	0.767	0.0947	NaN	PBRM1,SMAD3,SMAD7,MAPK12,MAPK11,RBP1,SMARCD3,NR2F1,FOS,PRKAR2B,TGFB1,PRKCD,PNRC1,MAPK10,PRKCE,NRIP1,CRABP2,PRKD1
IL-17A Signaling in Gastric Cells		1.11	0.751	0.16	NaN	FOS,MAPK10,MAPK12,MAPK11
Protein Kinase A Signaling		1.1	0.739	0.0846	NaN	PLCB2,PTPN13,SMAD3,GNB5,DUSP15,DUSP2,AKAP2,DUSP5,GLI3,TGFB1,FLNA,H1FX,PRKCE,PLCL1,PLCD4,EYA2,PTPRT,PRKD1,PPP3CA,CAMK2B,GNG4,AKAP5,PDE9A,PPP1R1B,PTPRH,DUSP9,ADD3,PRKAR2B,H3F3A/H3F3B,FLNC,PRKCD,NFATC2,PTPN21
ErbB2-ErbB3 Signaling		1.09	0.735	0.116	NaN	MYC,PIK3C2B,IRS1,FGFR1,PIK3C2G,MRAS,FGFR2,ERBB2
Gα12/13 Signaling		1.07	0.72	0.1	NaN	PIK3C2B,FGFR1,MEF2A,PIK3C2G,FGFR2,MAPK12,LPAR6,CDH2,CDH7,VAV3,IRS1,MRAS,MAPK10
ATM Signaling		1.04	0.695	0.119	NaN	GADD45A,TP73,CDKN1A,MAPK10,MAPK12,MAPK11,CDK1
Salvage Pathways of Pyrimidine Deoxyribonucleotides		1.03	0.689	0.25	NaN	APOBEC3B,APOBEC3G
Role of JAK1 and JAK3 in γc Cytokine Signaling		1.03	0.689	0.113	NaN	PIK3C2B,SOCS3,JAK1,IRS1,FGFR1,PIK3C2G,MRAS,FGFR2
Epithelial Adherens Junction Signaling		1.01	0.664	0.0959	NaN	TUBB3,NOTCH3,MYO7A,FGFR1,SNAI1,TUBB2B,CDH2,TUBA1A,TUBB6,SORBS1,MRAS,NECTIN1,PARD3,MAGI2
April Mediated Signaling		0.997	0.656	0.132	NaN	FOS,MAPK10,NFATC2,MAPK12,MAPK11
GPCR-Mediated Nutrient Sensing in Enteroendocrine Cells		0.981	0.643	0.106	NaN	GNG4,PLCB2,PRKAR2B,PRKCD,PRKCE,RAPGEF4,PLCL1,PLCD4,PRKD1
HIPPO signaling		0.958	0.623	0.105	NaN	TEAD1,YAP1,WWTR1,SMAD3,PPP2R2B,DLG2,CD44,PPP2R2C,PARD3
Corticotropin Releasing Hormone Signaling		0.952	0.623	0.0991	NaN	FOS,PRKAR2B,GLI3,PRKCD,GNAO1,MEF2A,GUCY1A2,PRKCE,MAPK12,MAPK11,PRKD1
Androgen Signaling		0.952	0.623	0.0991	NaN	GNG4,PRKAR2B,AR,SMAD3,PRKCD,GNAO1,MRAS,GNB5,PRKCE,GNAZ,PRKD1
Telomerase Signaling		0.952	0.623	0.0991	NaN	MYC,PIK3C2B,HDAC11,IRS1,FGFR1,PPP2R2B,CDKN1A,PIK3C2G,MRAS,FGFR2,PPP2R2C
Actin Cytoskeleton Signaling		0.945	0.618	0.0877	NaN	PIK3C2B,FN1,FGF9,FGFR1,PIK3C2G,ITGA5,FGFR2,CYFIP2,TIAM2,PPP1R12B,PAK3,FLNA,VAV3,IRS1,FGF12,MRAS,PAK5,TMSB10/TMSB4X,ITGA4,MSN
IL-4 Signaling		0.935	0.61	0.103	NaN	PIK3C2B,JAK1,INPP5J,IRS1,FGFR1,PIK3C2G,MRAS,NFATC2,FGFR2
B Cell Activating Factor Signaling		0.925	0.604	0.125	NaN	FOS,MAPK10,NFATC2,MAPK12,MAPK11
Transcriptional Regulatory Network in Embryonic Stem Cells		0.925	0.604	0.125	NaN	SOX2,ZIC3,L1CAM,FOXC1,GATA4
G Beta Gamma Signaling		0.912	0.593	0.102	NaN	GNG4,PRKAR2B,PRKCD,GNAO1,MRAS,GNB5,PRKCE,GNAZ,PRKD1
Docosahexaenoic Acid (DHA) Signaling		0.908	0.592	0.115	NaN	PIK3C2B,IRS1,FGFR1,PIK3C2G,FGFR2,BCL2
Neurotrophin/TRK Signaling		0.906	0.592	0.105	NaN	PIK3C2B,FOS,NTRK2,IRS1,FGFR1,PIK3C2G,MRAS,FGFR2
GADD45 Signaling		0.904	0.592	0.158	NaN	GADD45A,CDKN1A,CDK1
Asparagine Degradation I		0.897	0.59	0.5	NaN	ASRGL1
Choline Degradation I		0.897	0.59	0.5	NaN	CHDH
Putrescine Biosynthesis III		0.897	0.59	0.5	NaN	AZIN2
Sonic Hedgehog Signaling		0.884	0.582	0.133	NaN	DYRK1B,PRKAR2B,GLI3,CDK1
Angiopoietin Signaling		0.882	0.582	0.104	NaN	PIK3C2B,PAK3,IRS1,FGFR1,PIK3C2G,MRAS,FGFR2,PAK5
Estrogen-Dependent Breast Cancer Signaling		0.882	0.582	0.104	NaN	PIK3C2B,FOS,IRS1,FGFR1,PIK3C2G,MRAS,IGF1R,FGFR2
PI3K Signaling in B Lymphocytes		0.871	0.573	0.0938	NaN	FYN,FOS,PLCB2,VAV3,IRS1,MRAS,NFATC2,PLEKHA4,PLCL1,PLCD4,PPP3CA,CAMK2B
Embryonic Stem Cell Differentiation into Cardiac Lineages		0.865	0.569	0.2	NaN	SOX2,GATA4
VEGF Signaling		0.861	0.567	0.0971	NaN	PIK3C2B,FLT1,IRS1,FGFR1,PIK3C2G,MRAS,VEGFB,FGFR2,PGF,BCL2
Cardiomyocyte Differentiation via BMP Receptors		0.854	0.562	0.15	NaN	BMP7,BMP5,GATA4
Acute Myeloid Leukemia Signaling		0.848	0.558	0.0989	NaN	MYC,PIK3C2B,CCNA1,PIM1,IRS1,FGFR1,PIK3C2G,MRAS,FGFR2
Cellular Effects of Sildenafil (Viagra)		0.837	0.551	0.0923	NaN	PLCB2,KCNN1,PPP1R12B,PRKG1,PRKAR2B,GPR37,GUCY1A2,CACNA1C,KCNQ3,KCNH2,PLCL1,PLCD4
PKCθ Signaling in T Lymphocytes		0.837	0.551	0.0923	NaN	PIK3C2B,FYN,FOS,VAV3,IRS1,FGFR1,PIK3C2G,MRAS,NFATC2,FGFR2,PPP3CA,CAMK2B
Clathrin-mediated Endocytosis Signaling		0.823	0.539	0.0863	NaN	PIK3C2B,EPHB2,FGF9,SH3GL3,FGFR1,PIK3C2G,ITGA5,VEGFB,FGFR2,PGF,DNM1,APOA1,ARRB1,IRS1,FGF12,SH3KBP1,PPP3CA
3-phosphoinositide Biosynthesis		0.818	0.536	0.087	NaN	SOCS3,PIK3C2B,FYN,PPP1R1B,PTPN13,FGFR1,PIK3C2G,FGFR2,DUSP2,ATP1A1,PTPRH,IRS1,PPM1H,ERBB2,ALPL,PPP3CA
Pyrimidine Ribonucleotides Interconversion		0.81	0.529	0.125	NaN	ENTPD8,ENTPD2,AK4,AK9
Triacylglycerol Biosynthesis		0.797	0.519	0.114	NaN	PLPPR3,PLPP4,MBOAT1,ELOVL2,GPAT3
Prostate Cancer Signaling		0.788	0.512	0.0957	NaN	PIK3C2B,AR,IRS1,FGFR1,CDKN1A,PIK3C2G,MRAS,FGFR2,BCL2
Regulation of Cellular Mechanics by Calpain Protease		0.772	0.498	0.105	NaN	CAPN5,CCNA1,MRAS,ITGA5,CDK1,ITGA4
Cardiac β-adrenergic Signaling		0.756	0.483	0.0889	NaN	GNG4,AKAP2,AKAP5,PRKAR2B,PDE9A,GRK3,PPP2R2B,MRAS,GNB5,CACNA1C,PPP2R2C,SLC8A2
Pyrimidine Ribonucleotides De Novo Biosynthesis		0.742	0.478	0.118	NaN	ENTPD8,ENTPD2,AK4,AK9
Dermatan Sulfate Biosynthesis (Late Stages)		0.741	0.478	0.109	NaN	HS6ST2,CHST10,DSEL,CHST15,HS3ST5
Xenobiotic Metabolism Signaling		0.74	0.478	0.0804	NaN	PIK3C2B,CAMK1,CAMK1D,FGFR1,MAF,PIK3C2G,FGFR2,MAPK12,MAPK11,CHST15,IRS1,PRKCD,PPP2R2B,MRAS,HS6ST2,PRKCE,CHST10,PPP2R2C,NRIP1,PRKD1,ALDH5A1,HS3ST5,CAMK2B
Dendritic Cell Maturation		0.738	0.478	0.0842	NaN	PIK3C2B,PLCB2,FGFR1,PIK3C2G,COL2A1,FGFR2,CD58,MAPK12,MAPK11,COL1A1,FSCN1,IRS1,MAPK10,PLCL1,COL18A1,PLCD4
Methylglyoxal Degradation I		0.735	0.478	0.333	NaN	HAGHL
Thyronamine and Iodothyronamine Metabolism		0.735	0.478	0.333	NaN	DIO1
Thyroid Hormone Metabolism I (via Deiodination)		0.735	0.478	0.333	NaN	DIO1
4-aminobutyrate Degradation I		0.735	0.478	0.333	NaN	ALDH5A1
Small Cell Lung Cancer Signaling		0.733	0.478	0.0952	NaN	MYC,PIK3C2B,IRS1,FGFR1,PIK3C2G,FGFR2,CDKN2B,BCL2
Pyrimidine Deoxyribonucleotides De Novo Biosynthesis I		0.724	0.47	0.13	NaN	AK4,AK9,APOBEC3G
FLT3 Signaling in Hematopoietic Progenitor Cells		0.714	0.462	0.0941	NaN	PIK3C2B,IRS1,FGFR1,PIK3C2G,MRAS,FGFR2,MAPK12,MAPK11
Coagulation System		0.711	0.461	0.114	NaN	SERPINA5,SERPINE1,F3,A2M
Dermatan Sulfate Biosynthesis		0.701	0.454	0.1	NaN	XYLT1,HS6ST2,CHST10,DSEL,CHST15,HS3ST5
NRF2-mediated Oxidative Stress Response		0.7	0.454	0.0829	NaN	PIK3C2B,FGFR1,DNAJC6,MAF,PIK3C2G,DNAJA4,HSPB8,FGFR2,DNAJC1,DNAJC15,FOS,PRKCD,IRS1,MRAS,PRKCE,PRKD1
Tight Junction Signaling		0.684	0.439	0.0838	NaN	FOS,MPDZ,CLDN23,PRKAR2B,CLDN8,CLDN1,TGFB1,CLDN19,PPP2R2B,PPP2R2C,NECTIN1,MAGI2,SNAP25,NAPB
Fatty Acid Activation		0.682	0.439	0.154	NaN	ACSL4,ACSL1
α-Adrenergic Signaling		0.677	0.436	0.092	NaN	GNG4,PRKAR2B,PRKCD,MRAS,GNB5,PRKCE,SLC8A2,PRKD1
Cell Cycle: G2/M DNA Damage Checkpoint Regulation		0.664	0.425	0.102	NaN	CDKN2A,GADD45A,CDKN1A,TOP2A,CDK1
Acute Phase Response Signaling		0.658	0.421	0.0828	NaN	SOCS3,FN1,MAPK12,MAPK11,RBP1,C1R,C4A/C4B,FOS,APOA1,MRAS,SERPINE1,CRABP2,A2M,IL1RAP
CD28 Signaling in T Helper Cells		0.646	0.41	0.0853	NaN	PIK3C2B,FYN,FOS,IRS1,FGFR1,PIK3C2G,MAPK10,NFATC2,FGFR2,MAPK12,PPP3CA
Ubiquinol-10 Biosynthesis (Eukaryotic)		0.633	0.403	0.143	NaN	MICAL1,CYP4F11
Leukotriene Biosynthesis		0.633	0.403	0.143	NaN	GGT5,GGT7
B Cell Receptor Signaling		0.632	0.403	0.0811	NaN	PIK3C2B,FGFR1,PIK3C2G,FGFR2,MAPK12,MAPK11,PAX5,INPP5J,VAV3,PAG1,IRS1,MRAS,NFATC2,PPP3CA,CAMK2B
Retinoate Biosynthesis II		0.624	0.403	0.25	NaN	RBP1
Catecholamine Biosynthesis		0.624	0.403	0.25	NaN	DDC
α-tocopherol Degradation		0.624	0.403	0.25	NaN	CYP4F3
Myo-inositol Biosynthesis		0.624	0.403	0.25	NaN	ISYNA1
Phenylalanine Degradation I (Aerobic)		0.624	0.403	0.25	NaN	QDPR
NGF Signaling		0.624	0.403	0.0855	NaN	PIK3C2B,IRS1,PRKCD,FGFR1,PIK3C2G,MAPK10,MRAS,FGFR2,MAPK12,SMPD3
Antiproliferative Role of TOB in T Cell Signaling		0.617	0.399	0.115	NaN	CCNA1,TGFB1,SMAD3
Role of BRCA1 in DNA Damage Response		0.602	0.385	0.0897	NaN	PBRM1,FANCB,GADD45A,CDKN1A,SLC19A1,SMARCD3,FANCL
D-myo-inositol-5-phosphate Metabolism		0.589	0.374	0.0816	NaN	SOCS3,ATP1A1,PLCB2,PTPRH,PIP4P2,PPP1R1B,PTPN13,PPM1H,PLCD4,ALPL,DUSP2,PPP3CA
Thyroid Cancer Signaling		0.575	0.363	0.1	NaN	MYC,NTRK2,MRAS,RET
Neuroprotective Role of THOP1 in Alzheimer's Disease		0.575	0.363	0.1	NaN	PRKAR2B,MAPT,ECE1,MMP9
Gustation Pathway		0.555	0.349	0.082	NaN	P2RY2,PLCB2,LPAR6,ASIC2,PRKAR2B,SCNN1G,PDE9A,P2RY6,P2RX5,SCNN1B
Mechanisms of Viral Exit from Host Cells		0.551	0.349	0.0976	NaN	PRKCD,SH3GL3,PRKCE,PRKD1
Chondroitin Sulfate Degradation (Metazoa)		0.548	0.349	0.125	NaN	CD44,CEMIP
γ-glutamyl Cycle		0.548	0.349	0.125	NaN	GGT5,GGT7
Melanocyte Development and Pigmentation Signaling		0.546	0.349	0.0842	NaN	PIK3C2B,PRKAR2B,IRS1,FGFR1,PIK3C2G,MRAS,FGFR2,BCL2
IL-10 Signaling		0.542	0.349	0.0882	NaN	SOCS3,FOS,JAK1,MAPK12,MAPK11,IL1RAP
Remodeling of Epithelial Adherens Junctions		0.542	0.349	0.0882	NaN	DNM1,TUBB3,TUBA1A,TUBB6,MAPRE3,TUBB2B
Creatine-phosphate Biosynthesis		0.541	0.349	0.2	NaN	CKB
CMP-N-acetylneuraminate Biosynthesis I (Eukaryotes)		0.541	0.349	0.2	NaN	CMAS
Galactose Degradation I (Leloir Pathway)		0.541	0.349	0.2	NaN	GALM
Glutamate Degradation III (via 4-aminobutyrate)		0.541	0.349	0.2	NaN	ALDH5A1
Role of Pattern Recognition Receptors in Recognition of Bacteria and Viruses		0.541	0.349	0.0803	NaN	PIK3C2B,TGFB1,IRS1,PRKCD,FGFR1,PIK3C2G,MAPK10,FGFR2,PRKCE,MAPK12,PRKD1
Role of CHK Proteins in Cell Cycle Checkpoint Control		0.534	0.344	0.0909	NaN	PPP2R2B,CDKN1A,SLC19A1,PPP2R2C,CDK1
Intrinsic Prothrombin Activation Pathway		0.529	0.341	0.103	NaN	COL1A1,COL2A1,COL18A1
PI3K/AKT Signaling		0.529	0.341	0.0806	NaN	JAK1,INPP5J,PPP2R2B,CDKN1A,MRAS,ITGA5,PPP2R2C,MAPK8IP1,ITGA4,BCL2
Mitochondrial L-carnitine Shuttle Pathway		0.512	0.326	0.118	NaN	ACSL4,ACSL1
Atherosclerosis Signaling		0.493	0.31	0.0787	NaN	COL1A1,APOA1,TGFB1,CXCR4,COL2A1,RARRES3,COL18A1,F3,MMP9,ITGA4
Caveolar-mediated Endocytosis Signaling		0.492	0.31	0.0845	NaN	FYN,FLNC,FLNA,ITGA6,ITGA5,ITGA4
CTLA4 Signaling in Cytotoxic T Lymphocytes		0.49	0.31	0.0808	NaN	PIK3C2B,FYN,IRS1,FGFR1,PPP2R2B,PIK3C2G,FGFR2,PPP2R2C
iNOS Signaling		0.487	0.31	0.0909	NaN	FOS,JAK1,MAPK12,MAPK11
Chondroitin Sulfate Biosynthesis		0.48	0.31	0.0862	NaN	XYLT1,HS6ST2,CHST10,CHST15,HS3ST5
4-1BB Signaling in T Lymphocytes		0.478	0.31	0.0968	NaN	MAPK10,MAPK12,MAPK11
Role of MAPK Signaling in the Pathogenesis of Influenza		0.477	0.31	0.0833	NaN	MAPK10,MRAS,RARRES3,MAPK12,MAPK11,BCL2
GPCR-Mediated Integration of Enteroendocrine Signaling Exemplified by an L Cell		0.477	0.31	0.0833	NaN	PLCB2,PRKAR2B,SSTR5,PLCL1,ADCYAP1,PLCD4
Regulation of eIF4 and p70S6K Signaling		0.476	0.31	0.0764	NaN	PIK3C2B,IRS1,FGFR1,PPP2R2B,PIK3C2G,MRAS,ITGA5,FGFR2,PPP2R2C,MAPK12,MAPK11,ITGA4
Serotonin and Melatonin Biosynthesis		0.476	0.31	0.167	NaN	DDC
Ceramide Degradation		0.476	0.31	0.167	NaN	ACER2
NAD Biosynthesis III		0.476	0.31	0.167	NaN	NMNAT3
Molybdenum Cofactor Biosynthesis		0.476	0.31	0.167	NaN	MOCS1
MSP-RON Signaling Pathway		0.463	0.298	0.0847	NaN	PIK3C2B,IRS1,FGFR1,PIK3C2G,FGFR2
Role of Oct4 in Mammalian Embryonic Stem Cell Pluripotency		0.448	0.285	0.087	NaN	SOX2,NR2F1,BMI1,MEF2A
Induction of Apoptosis by HIV1		0.446	0.285	0.0833	NaN	BBC3,CXCR4,MAPK10,MAPK12,BCL2
p38 MAPK Signaling		0.443	0.283	0.0769	NaN	MYC,TIFA,H3F3A/H3F3B,TGFB1,MAPT,MEF2A,MAPK12,MAPK11,IL1RAP
3-phosphoinositide Degradation		0.441	0.283	0.0753	NaN	SOCS3,ATP1A1,PTPRH,PIP4P2,INPP5J,PPP1R1B,PTPN13,PPM1H,ALPL,DUSP2,PPP3CA
Apoptosis Signaling		0.436	0.279	0.0787	NaN	CAPN5,CASP2,MRAS,PRKCE,CDK1,BCL2L11,BCL2
Heparan Sulfate Biosynthesis		0.433	0.277	0.08	NaN	XYLT1,HS6ST2,CHST10,CHST15,EXTL1,HS3ST5
NAD Biosynthesis from 2-amino-3-carboxymuconate Semialdehyde		0.422	0.271	0.143	NaN	NMNAT3
Phosphatidylcholine Biosynthesis I		0.422	0.271	0.143	NaN	PCYT1B
NAD Salvage Pathway III		0.422	0.271	0.143	NaN	NMNAT3
PPARα/RXRα Activation		0.414	0.264	0.073	NaN	PPARA,PLCB2,SMAD3,NR2F1,CHD5,PRKAR2B,APOA1,TGFB1,IRS1,MRAS,PLCL1,PLCD4,IL1RAP
iCOS-iCOSL Signaling in T Helper Cells		0.41	0.262	0.075	NaN	PIK3C2B,IRS1,FGFR1,PIK3C2G,NFATC2,FGFR2,PLEKHA4,PPP3CA,CAMK2B
ERK5 Signaling		0.4	0.253	0.0794	NaN	MYC,FOS,SGK1,MEF2A,MRAS
TNFR1 Signaling		0.396	0.252	0.0816	NaN	FOS,PAK3,CASP2,PAK5
Chondroitin Sulfate Biosynthesis (Late Stages)		0.396	0.252	0.0816	NaN	HS6ST2,CHST10,CHST15,HS3ST5
Oxidative Ethanol Degradation III		0.393	0.251	0.0952	NaN	ACSS3,ACSL1
IL-17A Signaling in Fibroblasts		0.392	0.251	0.0857	NaN	FOS,MAPK12,MAPK11
Fcγ Receptor-mediated Phagocytosis in Macrophages and Monocytes		0.387	0.249	0.0753	NaN	NCK2,FYN,VAV3,PRKCD,PIK3C2G,PRKCE,PRKD1
PPAR Signaling		0.387	0.249	0.0753	NaN	NR2F1,PPARA,FOS,PPARD,MRAS,NRIP1,IL1RAP
Calcium-induced T Lymphocyte Apoptosis		0.386	0.249	0.0781	NaN	PRKCD,NFATC2,PRKCE,PPP3CA,PRKD1
Airway Pathology in Chronic Obstructive Pulmonary Disease		0.378	0.249	0.125	NaN	MMP9
Sphingosine and Sphingosine-1-phosphate Metabolism		0.378	0.249	0.125	NaN	ACER2
Histidine Degradation III		0.378	0.249	0.125	NaN	HAL
Inositol Pyrophosphates Biosynthesis		0.378	0.249	0.125	NaN	IP6K2
Glycoaminoglycan-protein Linkage Region Biosynthesis		0.378	0.249	0.125	NaN	XYLT1
Sphingomyelin Metabolism		0.378	0.249	0.125	NaN	SMPD3
Stearate Biosynthesis I (Animals)		0.373	0.249	0.0833	NaN	ELOVL2,ACSL4,ACSL1
Interferon Signaling		0.373	0.249	0.0833	NaN	IFITM3,JAK1,BCL2
autophagy		0.373	0.249	0.0833	NaN	ULK1,ATG9B,BCL2
Gαs Signaling		0.372	0.249	0.0734	NaN	GNG4,ADD3,PRKAR2B,DRD1,PTH1R,MRAS,GNB5,RAPGEF4
Mitotic Roles of Polo-Like Kinase		0.359	0.239	0.0758	NaN	TGFB1,PLK2,PPP2R2B,PPP2R2C,CDK1
Aryl Hydrocarbon Receptor Signaling		0.359	0.239	0.0714	NaN	NR2F1,CDKN2A,MYC,FOS,CCNA1,TP73,TGFB1,CDKN1A,NRIP1,ALDH5A1
Lymphotoxin β Receptor Signaling		0.346	0.229	0.0746	NaN	PIK3C2B,IRS1,FGFR1,PIK3C2G,FGFR2
Heparan Sulfate Biosynthesis (Late Stages)		0.346	0.229	0.0746	NaN	HS6ST2,CHST10,CHST15,EXTL1,HS3ST5
Pathogenesis of Multiple Sclerosis		0.34	0.228	0.111	NaN	CCL3
Sucrose Degradation V (Mammalian)		0.34	0.228	0.111	NaN	GALM
Phosphatidylethanolamine Biosynthesis II		0.34	0.228	0.111	NaN	ETNK2
Leucine Degradation I		0.34	0.228	0.111	NaN	HMGCLL1
CDP-diacylglycerol Biosynthesis I		0.325	0.216	0.0833	NaN	MBOAT1,GPAT3
D-myo-inositol (1,4,5,6)-Tetrakisphosphate Biosynthesis		0.324	0.216	0.0698	NaN	SOCS3,ATP1A1,PTPRH,PPP1R1B,PTPN13,PPM1H,ALPL,DUSP2,PPP3CA
D-myo-inositol (3,4,5,6)-tetrakisphosphate Biosynthesis		0.324	0.216	0.0698	NaN	SOCS3,ATP1A1,PTPRH,PPP1R1B,PTPN13,PPM1H,ALPL,DUSP2,PPP3CA
Unfolded protein response		0.322	0.215	0.0741	NaN	PDIA2,PPP1R15A,CEBPG,BCL2
Ketogenesis		0.307	0.206	0.1	NaN	HMGCLL1
Calcium Transport I		0.307	0.206	0.1	NaN	ATP2B2
Glycine Betaine Degradation		0.307	0.206	0.1	NaN	SARDH
Bupropion Degradation		0.306	0.206	0.08	NaN	CYP4F8,CYP4B1
Gluconeogenesis I		0.306	0.206	0.08	NaN	ME3,ENO2
Ethanol Degradation IV		0.306	0.206	0.08	NaN	ACSS3,ACSL1
MIF Regulation of Innate Immunity		0.293	0.195	0.0732	NaN	FOS,MAPK10,MAPK12
Phosphatidylglycerol Biosynthesis II (Non-plastidic)		0.287	0.19	0.0769	NaN	MBOAT1,GPAT3
Antioxidant Action of Vitamin C		0.286	0.19	0.068	NaN	PLCB2,MAPK10,RARRES3,PLCL1,MAPK12,MAPK11,PLCD4
NF-κB Signaling		0.284	0.19	0.0667	NaN	PIK3C2B,NTRK2,FLT1,IRS1,FGFR1,PELI1,PIK3C2G,MRAS,TGFA,IGF1R,FGFR2,FGFRL1
Purine Nucleotides De Novo Biosynthesis II		0.279	0.186	0.0909	NaN	ADSSL1
phagosome maturation		0.273	0.182	0.0667	NaN	TUBB3,TUBA1A,TUBB6,ATP6V1E2,DYNC1I1,SNAP25,NAPB,TUBB2B
IL-15 Production		0.27	0.182	0.0741	NaN	JAK1,PTK7
D-myo-inositol (1,4,5)-Trisphosphate Biosynthesis		0.27	0.182	0.0741	NaN	PLCB2,PLCD4
Acetone Degradation I (to Methylglyoxal)		0.27	0.182	0.0741	NaN	CYP4F8,CYP4B1
Serotonin Receptor Signaling		0.266	0.179	0.0698	NaN	HTR1E,DDC,QDPR
Role of Wnt/GSK-3β Signaling in the Pathogenesis of Influenza		0.249	0.165	0.0658	NaN	FZD4,WNT9A,FZD2,WNT11,FZD7
Role of PI3K/AKT Signaling in the Pathogenesis of Influenza		0.249	0.165	0.0658	NaN	PIK3C2B,IRS1,FGFR1,PIK3C2G,FGFR2
Choline Biosynthesis III		0.232	0.149	0.0769	NaN	PCYT1B
nNOS Signaling in Skeletal Muscle Cells		0.195	0.114	0.0667	NaN	SNTA1
NAD biosynthesis II (from tryptophan)		0.195	0.114	0.0667	NaN	NMNAT3

## Sheet: SUM44 LTED up-regulated pathway
Ingenuity Canonical Pathways	-log(p-value)	-log(B-H p-value)	Ratio	z-score	Molecules
Mitotic Roles of Polo-Like Kinase	10	7.33	0.318	NaN	KIF23,CDC25C,ESPL1,CDC20,PPP2R2A,PTTG1,CDC7,PPP2R3B,CCNB2,PLK1,CDK1,CCNB1,CDC25B,PLK4,FBXO5,PKMYT1,PPP2R2C,RAD21,CHEK2,KIF11,CDC25A
Role of CHK Proteins in Cell Cycle Checkpoint Control	8.02	5.67	0.309	NaN	CDC25C,PPP2R2A,PPP2R3B,PLK1,RPA1,RFC5,CDK1,RFC4,E2F1,RFC2,SLC19A1,CLSPN,PPP2R2C,BRCA1,CHEK2,CDK2,CDC25A
Hereditary Breast Cancer Signaling	7.81	5.67	0.197	NaN	BARD1,RAD51,FANCB,FANCD2,FGFR4,RFC2,SLC19A1,BRCA1,BLM,CHEK2,POLR2I,CDC25C,FANCG,TUBG1,HDAC1,FGFR2,RPA1,RFC5,CDK1,CCNB1,POLR2G,RFC4,H2AFX,E2F1,FAAP24,BRCA2,SFN,FANCA
Role of BRCA1 in DNA Damage Response	7.76	5.67	0.256	NaN	TOPBP1,FANCG,BARD1,PLK1,RPA1,RBL1,RFC5,RAD51,FANCB,RFC4,FANCD2,E2F1,FAAP24,RFC2,BRCA2,SLC19A1,BRCA1,BLM,FANCA,CHEK2
Cell Cycle Control of Chromosomal Replication	6.79	4.8	0.407	NaN	MCM5,CDC45,MCM2,CDT1,ORC6,CDC7,RPA1,CDK2,CHEK2,MCM7,ORC1
Salvage Pathways of Pyrimidine Ribonucleotides	6.4	4.48	0.215	NaN	PYCR3,NME1,FAM20B,MAP3K6,NME2,MAPK6,PLK1,PCK1,TTK,CDK1,PKN1,BRAF,NME3,MAPK3,PRKCD,GRK6,PRKAA2,PRKCH,POMK,CDK2
Cell Cycle: G2/M DNA Damage Checkpoint Regulation	6.24	4.39	0.286	NaN	CDC25B,CDC25C,CKS2,CKS1B,PKMYT1,CCNB2,PLK1,AURKA,SFN,BRCA1,CDK1,CHEK2,CCNB1,SKP2
ATM Signaling	5.93	4.14	0.254	NaN	CDC25C,CCNB2,CDK1,CCNB1,RAD51,SMC2,FANCD2,H2AFX,BID,ATF4,BRCA1,BLM,CHEK2,CDK2,CDC25A
Cyclins and Cell Cycle Regulation	5.62	3.88	0.218	NaN	PPP2R2A,SUV39H1,HDAC1,CDKN2C,PPP2R3B,CCNB2,CDK1,CCNB1,SKP2,CCNA2,MYT1,CDKN2D,E2F1,PPP2R2C,CDKN1B,CDK2,CDC25A
Breast Cancer Regulation by Stathmin1	5.47	3.79	0.148	NaN	TUBA1B,PPP2R2A,PPP2R3B,TUBB,TUBB2B,FGFR4,MAPK3,ARHGEF2,PPP2R2C,GNB1L,GNG4,ADCY2,TUBB4B,ADCY3,TUBB2A,TUBG1,TUBA4A,GNAI1,FGFR2,CDK1,PPP1R3D,PRKAR2B,ARHGEF16,PRKCD,E2F1,GNB2,PRKCH,CDKN1B,ADCY7,CDK2
Pyridoxal 5'-phosphate Salvage Pathway	5.44	3.79	0.234	NaN	FAM20B,MAP3K6,MAPK6,PLK1,TTK,CDK1,PKN1,BRAF,MAPK3,PRKCD,PRKAA2,GRK6,POMK,PRKCH,CDK2
Estrogen-mediated S-phase Entry	5.3	3.69	0.375	NaN	CCNA2,E2F1,CDKN1B,RBL1,ESR1,CDK1,CDK2,CDC25A,SKP2
tRNA Charging	4.97	3.39	0.282	NaN	WARS,CARS,YARS,GARS,AARS,DARS2,MARS,SARS,IARS,FARSB,EPRS
Molecular Mechanisms of Cancer	4.62	3.07	0.115	NaN	FZD10,WNT10B,BAD,SUV39H1,CDKN2C,HIF1A,BMPR1B,RBL1,CDC25B,BRAF,FANCD2,FGFR4,MAPK3,BID,ARHGEF2,BRCA1,CHEK2,CDC25A,PMAIP1,CDC25C,ADCY2,GNA12,DVL1,ADCY3,GNAI1,ITGA5,FGFR2,GNAZ,AURKA,RAC3,FZD8,CDKN2D,PRKAR2B,PRKCD,ARHGEF16,E2F1,LEF1,PRKCH,BMP7,CDKN1B,ADCY7,CDK2,CASP7
DNA Double-Strand Break Repair by Homologous Recombination	4.07	2.56	0.429	NaN	RAD51,LIG1,GEN1,BRCA2,RPA1,BRCA1
Mismatch Repair in Eukaryotes	3.69	2.2	0.375	NaN	RFC4,RFC2,SLC19A1,RPA1,RFC5,POLD1
Pyrimidine Deoxyribonucleotides De Novo Biosynthesis I	3.58	2.12	0.304	NaN	TYMS,NME3,NME1,NME2,PCK1,DTYMK,RRM1
mTOR Signaling	3.51	2.08	0.126	NaN	RPS19,RPS3A,PPP2R2A,FGFR2,PPP2R3B,RPS21,PLD6,HIF1A,MLST8,EIF4EBP1,RPS6,RPS15,EIF3D,PRKCD,MAPK3,FGFR4,PRKAA2,PPP2R2C,PRKCH,RPS6KA4,GNB1L,RPS3,RPS5,RPSA,RPS24
DNA damage-induced 14-3-3σ Signaling	3.23	1.82	0.316	NaN	CCNB2,SFN,BRCA1,CDK1,CDK2,CCNB1
Adipogenesis pathway	3.03	1.64	0.134	NaN	FZD10,WNT10B,DDIT3,HDAC1,XBP1,FGFR2,SAP30,HIF1A,CEBPB,NOCT,FZD8,SREBF1,FGFR4,CEBPA,BMP7,KLF3,KAT2A,TNF
Unfolded protein response	2.95	1.58	0.185	NaN	DDIT3,SREBF1,HSPH1,CEBPA,HSPA6,XBP1,ATF4,CEBPB,HSPA2,CEBPG
Protein Kinase A Signaling	2.75	1.4	0.0974	NaN	HIST1H1C,MYH10,BAD,PTPN13,NTN1,CDC25B,CDKN3,BRAF,DUSP5,MAPK3,PTPN1,ATF4,DUSP7,PGP,GNB1L,HIST2H3C,CDC25A,GNG4,CDC25C,ADCY2,HIST1H3C,ADCY3,GNAI1,PTP4A1,HIST1H1B,PPP1R3D,HIST1H1E,PRKAR2B,PRKCD,GNB2,KDELR3,HIST1H1D,PRKCH,DUSP4,LEF1,SFN,ADCY7,KDELR2
dTMP De Novo Biosynthesis	2.72	1.39	0.6	NaN	TYMS,DHFR,SHMT2
p53 Signaling	2.64	1.33	0.135	NaN	PMAIP1,TOPBP1,HDAC1,FGFR2,HIF1A,BIRC5,SCO2,FGFR4,E2F1,BRCA1,SFN,PIDD1,CHEK2,CDK2,DRAM1
Regulation of eIF4 and p70S6K Signaling	2.62	1.33	0.121	NaN	RPS19,RPS3A,PPP2R2A,ITGA5,FGFR2,PPP2R3B,RPS21,EIF2S2,EIF4EBP1,RPS6,RPS15,EIF3D,MAPK3,FGFR4,PPP2R2C,RPS5,RPS3,RPS24,RPSA
Purine Nucleotides De Novo Biosynthesis II	2.54	1.28	0.364	NaN	IMPDH2,PAICS,ATIC,PPAT
Dolichyl-diphosphooligosaccharide Biosynthesis	2.54	1.28	0.364	NaN	ALG3,DPM2,ALG8,DPM3
Cysteine Biosynthesis III (mammalia)	2.49	1.25	0.278	NaN	CBS/CBSL,SUV39H2,MGMT,MRM2,AHCY
UDP-D-xylose and UDP-D-glucuronate Biosynthesis	2.46	1.25	1	NaN	UXS1,UGDH
Guanine and Guanosine Salvage I	2.46	1.25	1	NaN	PNP,HPRT1
Arginine Degradation VI (Arginase 2 Pathway)	2.44	1.25	0.5	NaN	PYCR3,OAT,ARG2
GDP-mannose Biosynthesis	2.44	1.25	0.5	NaN	GMPPB,PMM1,PMM2
Aryl Hydrocarbon Receptor Signaling	2.42	1.25	0.121	NaN	ALDH1B1,CYP1A1,TFF1,RBL1,CCNA2,MAPK3,RARA,RARB,E2F1,DHFR,CDKN1B,ALDH3B2,ESR1,TNF,CHEK2,CDK2,MCM7
Cell Cycle: G1/S Checkpoint Regulation	2.38	1.22	0.156	NaN	CDKN2D,SUV39H1,HDAC1,E2F1,CDKN2C,CDKN1B,RBL1,CDK2,CDC25A,SKP2
14-3-3-mediated Signaling	2.37	1.22	0.123	NaN	TUBA1B,BAD,TUBB4B,TUBG1,TUBB2A,TUBA4A,FGFR2,TUBB,TUBB2B,MAPK3,FGFR4,PRKCD,PRKCH,CDKN1B,SFN,TNF
Granzyme A Signaling	2.28	1.14	0.25	NaN	HIST1H1B,HIST1H1C,NME1,HIST1H1E,HIST1H1D
ERK/MAPK Signaling	2.13	1.01	0.106	NaN	MYCN,BAD,PPP2R2A,HIST1H3C,ITGA5,FGFR2,PPP2R3B,RAC3,EIF4EBP1,BRAF,PPP1R3D,PRKAR2B,MAPK3,FGFR4,PRKCD,ATF4,RPS6KA4,DUSP4,PPP2R2C,ESR1,HIST2H3C
Colanic Acid Building Blocks Biosynthesis	2.12	1.01	0.286	NaN	GMPPB,UGDH,PMM1,PMM2
Superpathway of Methionine Degradation	2.06	0.958	0.194	NaN	CBS/CBSL,SUV39H2,MGMT,GOT2,MRM2,AHCY
D-glucuronate Degradation I	2	0.932	0.667	NaN	DCXR,CRYL1
Inosine-5'-phosphate Biosynthesis II	2	0.932	0.667	NaN	PAICS,ATIC
Oxidized GTP and dGTP Detoxification	2	0.932	0.667	NaN	RUVBL2,NUDT1
Pyrimidine Ribonucleotides Interconversion	1.99	0.932	0.188	NaN	NME3,NME1,NME2,PCK1,CTPS1,NUDT15
Gap Junction Signaling	1.97	0.919	0.107	NaN	TUBA1B,ADCY2,TUBB4B,TUBG1,TUBB2A,ADCY3,TUBA4A,GNAI1,FGFR2,TUBB,TUBB2B,PRKAR2B,MAPK3,FGFR4,PRKCD,PRKCH,ADCY7,ACTG1
EIF2 Signaling	1.95	0.913	0.103	NaN	RPS19,RPS3A,RPL3,FGFR2,RPS21,EIF2S2,RPS6,RPL27A,RPL14,RPS15,RPL35,RPL8,RPL18A,EIF3D,MAPK3,FGFR4,RPS5,RPS3,RPS24,RPSA
P2Y Purigenic Receptor Signaling Pathway	1.94	0.913	0.114	NaN	GNG4,ADCY2,ADCY3,GNAI1,FGFR2,P2RY2,PRKAR2B,MAPK3,FGFR4,PRKCD,GNB2,ATF4,PRKCH,GNB1L,ADCY7
Granzyme B Signaling	1.9	0.891	0.25	NaN	LMNB2,BID,LMNB1,DFFA
Methionine Degradation I (to Homocysteine)	1.9	0.891	0.25	NaN	SUV39H2,MGMT,MRM2,AHCY
α-Adrenergic Signaling	1.87	0.87	0.126	NaN	GNG4,ADCY2,PRKAR2B,MAPK3,PRKCD,ADCY3,GNB2,GNAI1,PRKCH,GNB1L,ADCY7
Pyrimidine Ribonucleotides De Novo Biosynthesis	1.86	0.87	0.176	NaN	NME3,NME1,NME2,PCK1,CTPS1,NUDT15
Corticotropin Releasing Hormone Signaling	1.85	0.867	0.117	NaN	ADCY2,CNR1,ADCY3,GNAI1,BRAF,PRKAR2B,MAPK3,PRKCD,NR4A1,ATF4,JUND,PRKCH,ADCY7
G Beta Gamma Signaling	1.84	0.86	0.125	NaN	GNG4,ADCY2,PRKAR2B,MAPK3,GNA12,PRKCD,GNB2,GNAI1,PRKCH,GNAZ,GNB1L
UVB-Induced MAPK Signaling	1.82	0.847	0.136	NaN	BAD,MAPK3,FGFR4,PRKCD,HIST1H3C,FGFR2,PRKCH,EIF4EBP1,HIST2H3C
Cell Cycle Regulation by BTG Family Proteins	1.8	0.843	0.171	NaN	PPP2R2A,E2F1,PPP2R3B,PPP2R2C,CDK2,NOCT
Antiproliferative Role of TOB in T Cell Signaling	1.78	0.824	0.192	NaN	CCNA2,TOB1,CDKN1B,CDK2,SKP2
Stearate Biosynthesis I (Animals)	1.75	0.814	0.167	NaN	FAM213B,FASN,ELOVL2,ACOT7,SLC27A4,ELOVL6
Remodeling of Epithelial Adherens Junctions	1.74	0.814	0.132	NaN	TUBA1B,NME1,TUBB4B,TUBG1,TUBB2A,TUBA4A,TUBB,ACTG1,TUBB2B
IL-1 Signaling	1.74	0.814	0.121	NaN	GNG4,ADCY2,PRKAR2B,GNA12,ADCY3,GNB2,GNAI1,IL1R1,GNAZ,GNB1L,ADCY7
Regulation of Cellular Mechanics by Calpain Protease	1.74	0.814	0.14	NaN	CCNA2,CAPN6,CAPN11,MAPK3,ITGA5,CDKN1B,CDK1,CDK2
Arginine Degradation I (Arginase Pathway)	1.71	0.798	0.5	NaN	OAT,ARG2
Colorectal Cancer Metastasis Signaling	1.67	0.765	0.0931	NaN	GNG4,FZD10,ADCY2,WNT10B,BAD,GRK3,MMP15,ADCY3,DVL1,FGFR2,MMP25,BIRC5,BRAF,FZD8,PRKAR2B,MAPK3,FGFR4,GNB2,LEF1,GNB1L,TNF,ADCY7,MMP17
Superpathway of Cholesterol Biosynthesis	1.64	0.749	0.179	NaN	MVD,DHCR7,EBP,ACAT1,LBR
p70S6K Signaling	1.64	0.749	0.107	NaN	IL4R,BAD,PPP2R2A,GNAI1,FGFR2,PPP2R3B,RPS6,MAPK3,FGFR4,PRKCD,SYK,PPP2R2C,PRKCH,SFN
GADD45 Signaling	1.64	0.749	0.211	NaN	BRCA1,CDK1,CDK2,CCNB1
Ovarian Cancer Signaling	1.63	0.748	0.104	NaN	FZD10,WNT10B,SUV39H1,DVL1,FGFR2,RAD51,BRAF,FZD8,PRKAR2B,MAPK3,FGFR4,E2F1,BRCA2,LEF1,BRCA1
CREB Signaling in Neurons	1.6	0.731	0.0978	NaN	POLR2I,GNG4,ADCY2,GNA12,ADCY3,GNAI1,FGFR2,GNAZ,POLR2G,PRKAR2B,MAPK3,FGFR4,PRKCD,GNB2,ATF4,PRKCH,GNB1L,ADCY7
Gαi Signaling	1.6	0.731	0.108	NaN	GNG4,ADCY2,CNR1,ADCY3,GNAI1,RGS12,S1PR3,PRKAR2B,MAPK3,GNB2,ADRA2C,GNB1L,ADCY7
Small Cell Lung Cancer Signaling	1.58	0.72	0.119	NaN	FGFR4,SUV39H1,RARB,E2F1,CKS1B,BID,FGFR2,CDKN1B,CDK2,SKP2
D-myo-inositol-5-phosphate Metabolism	1.56	0.707	0.102	NaN	WBP11,CDC25C,PTPN13,PPFIA3,PPM1K,PXYLP1,PLCH1,NUDT15,CDC25B,PIP4P2,PTPN1,PPM1H,PGAM5,NUDT1,CDC25A
Ephrin B Signaling	1.56	0.707	0.123	NaN	GNG4,CXCR4,MAPK3,GNA12,GNB2,GNAI1,GNAZ,GNB1L,RAC3
BER pathway	1.52	0.682	0.25	NaN	LIG1,POLE,XRCC1
Tyrosine Degradation I	1.51	0.682	0.4	NaN	HGD,FAH
Folate Polyglutamylation	1.51	0.682	0.4	NaN	MTHFD1,SHMT2
Androgen Signaling	1.51	0.682	0.108	NaN	POLR2I,POLR2G,GNG4,PRKAR2B,MAPK3,GNA12,PRKCD,GNB2,GNAI1,PRKCH,GNAZ,GNB1L
Mechanisms of Viral Exit from Host Cells	1.49	0.675	0.146	NaN	PRKCD,LMNB2,PRKCH,LMNB1,ACTG1,VPS37C
Endoplasmic Reticulum Stress Pathway	1.49	0.675	0.19	NaN	DDIT3,XBP1,ATF4,CASP7
Cholesterol Biosynthesis I	1.42	0.627	0.231	NaN	DHCR7,EBP,LBR
Cholesterol Biosynthesis II (via 24,25-dihydrolanosterol)	1.42	0.627	0.231	NaN	DHCR7,EBP,LBR
Cholesterol Biosynthesis III (via Desmosterol)	1.42	0.627	0.231	NaN	DHCR7,EBP,LBR
D-myo-inositol (1,4,5,6)-Tetrakisphosphate Biosynthesis	1.38	0.592	0.101	NaN	WBP11,CDC25C,PTPN13,PPFIA3,PPM1K,NUDT15,PXYLP1,CDC25B,PTPN1,PPM1H,PGAM5,NUDT1,CDC25A
D-myo-inositol (3,4,5,6)-tetrakisphosphate Biosynthesis	1.38	0.592	0.101	NaN	WBP11,CDC25C,PTPN13,PPFIA3,PPM1K,NUDT15,PXYLP1,CDC25B,PTPN1,PPM1H,PGAM5,NUDT1,CDC25A
Wnt/β-catenin Signaling	1.37	0.589	0.0947	NaN	FZD10,WNT10B,PPP2R2A,HDAC1,DVL1,SOX12,PPP2R3B,FZD8,RARA,RARB,TLE3,LEF1,PPP2R2C,RUVBL2,KREMEN2,SOX5
Proline Biosynthesis II (from Arginine)	1.35	0.582	0.333	NaN	PYCR3,OAT
UDP-N-acetyl-D-glucosamine Biosynthesis II	1.35	0.582	0.333	NaN	GNPNAT1,GFPT1
Factors Promoting Cardiogenesis in Vertebrates	1.35	0.582	0.109	NaN	FZD8,FZD10,PRKCD,DVL1,BMP7,PRKCH,LEF1,BMPR1B,CDK2,GATA4
Pancreatic Adenocarcinoma Signaling	1.33	0.573	0.102	NaN	RAD51,BAD,MAPK3,FGFR4,SUV39H1,E2F1,BRCA2,FGFR2,PLD6,CDKN1B,BIRC5,CDK2
Growth Hormone Signaling	1.31	0.552	0.111	NaN	MAPK3,FGFR4,PRKCD,CEBPA,IGFALS,SOCS2,FGFR2,RPS6KA4,PRKCH
3-phosphoinositide Degradation	1.29	0.549	0.0959	NaN	WBP11,CDC25C,PTPN13,PPFIA3,PPM1K,NUDT15,PXYLP1,CDC25B,PIP4P2,PTPN1,PPM1H,PGAM5,NUDT1,CDC25A
Prostate Cancer Signaling	1.29	0.549	0.106	NaN	BAD,MAPK3,FGFR4,SUV39H1,E2F1,ATF4,FGFR2,LEF1,CDKN1B,CDK2
AMPK Signaling	1.25	0.521	0.0899	NaN	PPP2R2A,FGFR2,PPP2R3B,MLST8,EIF4EBP1,CCNA2,AK6,PRKAR2B,PCK2,FGFR4,FASN,PRKAA2,ATF4,ADRA2C,PPP2R2C,GNB1L,PPAT
Thrombin Signaling	1.25	0.521	0.0887	NaN	GNG4,ADCY2,GNA12,ADCY3,GNAI1,FGFR2,GNAZ,MAPK3,FGFR4,PRKCD,ARHGEF16,GNB2,PRKCH,ARHGEF2,GNB1L,GATA3,ADCY7,GATA4
Sphingosine-1-phosphate Signaling	1.24	0.521	0.0984	NaN	S1PR3,ADCY2,MAPK3,FGFR4,ACER2,GNA12,ADCY3,GNAI1,FGFR2,ADCY7,CASP7,PDGFB
Gαs Signaling	1.24	0.521	0.101	NaN	GNG4,BRAF,ADCY2,PRKAR2B,MAPK3,CNR1,ADCY3,GNB2,ATF4,GNB1L,ADCY7
Acetyl-CoA Biosynthesis III (from Citrate)	1.23	0.521	1	NaN	ACLY
Glutamate Removal from Folates	1.23	0.521	1	NaN	GGH
Xanthine and Xanthosine Salvage	1.23	0.521	1	NaN	PNP
Superpathway of Serine and Glycine Biosynthesis I	1.22	0.521	0.286	NaN	PHGDH,SHMT2
Adenine and Adenosine Salvage III	1.22	0.521	0.286	NaN	PNP,HPRT1
Glioma Signaling	1.22	0.521	0.1	NaN	CDKN2D,MAPK3,FGFR4,SUV39H1,PRKCD,E2F1,CDKN2C,FGFR2,PRKCH,RBL1,PDGFB
Relaxin Signaling	1.21	0.521	0.0933	NaN	GNG4,ADCY2,GNA12,ADCY3,GNAI1,FGFR2,GNAZ,BRAF,PRKAR2B,MAPK3,FGFR4,GNB2,GNB1L,ADCY7
GPCR-Mediated Nutrient Sensing in Enteroendocrine Cells	1.2	0.508	0.106	NaN	GNG4,ADCY2,PRKAR2B,PRKCD,ADCY3,GNAI1,PRKCH,ADCY7,PYY
CXCR4 Signaling	1.19	0.507	0.0909	NaN	GNG4,ADCY2,CXCR4,GNA12,ADCY3,GNAI1,FGFR2,GNAZ,MAPK3,FGFR4,PRKCD,GNB2,PRKCH,GNB1L,ADCY7
γ-glutamyl Cycle	1.19	0.507	0.188	NaN	CHAC1,GGCT,CHAC2
CDK5 Signaling	1.17	0.492	0.101	NaN	ADCY2,PPP1R3D,PRKAR2B,PPP2R2A,MAPK3,ADCY3,MAPK6,PPP2R3B,PPP2R2C,ADCY7
Superpathway of Inositol Phosphate Compounds	1.14	0.468	0.0848	NaN	WBP11,CDC25C,PTPN13,PPFIA3,IPPK,FGFR2,PPM1K,PXYLP1,NUDT15,PLCH1,CDC25B,PIP4P2,FGFR4,PTPN1,PPM1H,ITPKC,PGAM5,NUDT1,CDC25A
Type II Diabetes Mellitus Signaling	1.14	0.468	0.0945	NaN	MAPK3,FGFR4,PRKCD,PRKAA2,IRS4,SOCS2,FGFR2,PRKCH,CEBPB,TNF,SLC27A4,KCNJ11
Antiproliferative Role of Somatostatin Receptor 2	1.13	0.465	0.107	NaN	GNG4,BRAF,MAPK3,FGFR4,GNB2,FGFR2,CDKN1B,GNB1L
eNOS Signaling	1.12	0.465	0.0903	NaN	ADCY2,ADCY3,HSPA6,FGFR2,HSPA2,CCNA2,PRKAR2B,STUB1,FGFR4,PRKCD,PRKAA2,PRKCH,ESR1,ADCY7
Estrogen Receptor Signaling	1.12	0.465	0.0938	NaN	POLR2I,POLR2G,PELP1,TAF6,TAF5,PCK2,MAPK3,HIST1H3C,MED30,PCK1,ESR1,HIST2H3C
Citrulline Biosynthesis	1.11	0.465	0.25	NaN	OAT,ARG2
Salvage Pathways of Pyrimidine Deoxyribonucleotides	1.11	0.465	0.25	NaN	APOBEC3B,TK1
Apoptosis Signaling	1.1	0.453	0.101	NaN	CAPN6,CAPN11,BAD,MAPK3,BID,TNF,CASP7,CDK1,DFFA
Non-Small Cell Lung Cancer Signaling	1.07	0.437	0.104	NaN	BAD,MAPK3,FGFR4,SUV39H1,RARB,E2F1,FGFR2,RASSF1
Dopamine Receptor Signaling	1.07	0.437	0.104	NaN	ADCY2,PPP1R3D,PRKAR2B,PPP2R2A,ADCY3,PPP2R3B,PPP2R2C,ADCY7
Hepatic Cholestasis	1.05	0.421	0.0881	NaN	ADCY2,ADCY3,IL1R1,PRKAR2B,SREBF1,IL17D,RARA,PRKCD,PPRC1,FGFR4,PRKCH,ESR1,ADCY7,TNF
Acute Myeloid Leukemia Signaling	1.05	0.421	0.0989	NaN	BRAF,BAD,MAPK3,FGFR4,RARA,CEBPA,FGFR2,LEF1,EIF4EBP1
PTEN Signaling	1.03	0.401	0.0924	NaN	MAST2,BAD,MAPK3,FGFR4,ITGA5,FGFR2,MAGIX,BMPR1B,CDKN1B,TNFRSF11A,RAC3
Folate Transformations I	1.02	0.399	0.222	NaN	MTHFD1,SHMT2
Sonic Hedgehog Signaling	1.01	0.391	0.133	NaN	ARRB2,PRKAR2B,CDK1,CCNB1
Ceramide Signaling	1	0.391	0.0968	NaN	S1PR3,BAD,PPP2R2A,MAPK3,FGFR4,PPP2R3B,FGFR2,PPP2R2C,TNF
Cardiac β-adrenergic Signaling	0.984	0.39	0.0889	NaN	GNG4,ADCY2,PPP1R3D,PRKAR2B,PPP2R2A,GRK3,ADCY3,GNB2,PPP2R3B,PPP2R2C,GNB1L,ADCY7
Melanoma Signaling	0.978	0.39	0.109	NaN	BRAF,BAD,MAPK3,FGFR4,E2F1,FGFR2
Sertoli Cell-Sertoli Cell Junction Signaling	0.973	0.39	0.0843	NaN	TUBA1B,PRKAR2B,MAP3K6,TUBB4B,MAPK3,TUBB2A,TUBG1,MAP3K20,TUBA4A,ITGA5,TUBB,TNF,ACTG1,TUBB2B,OCLN
Melanocyte Development and Pigmentation Signaling	0.962	0.39	0.0947	NaN	ADCY2,PRKAR2B,MAPK3,FGFR4,ADCY3,ATF4,FGFR2,RPS6KA4,ADCY7
Cardiomyocyte Differentiation via BMP Receptors	0.953	0.39	0.15	NaN	BMP7,BMPR1B,GATA4
DNA Methylation and Transcriptional Repression Signaling	0.953	0.39	0.15	NaN	HDAC1,SAP30,DNMT1
Spliceosomal Cycle	0.94	0.39	0.5	NaN	U2AF1/U2AF1L5
Alanine Degradation III	0.94	0.39	0.5	NaN	GPT2
Alanine Biosynthesis II	0.94	0.39	0.5	NaN	GPT2
Palmitate Biosynthesis I (Animals)	0.94	0.39	0.5	NaN	FASN
Spermidine Biosynthesis I	0.94	0.39	0.5	NaN	SRM
Sulfate Activation for Sulfonation	0.94	0.39	0.5	NaN	PAPSS1
Fatty Acid Biosynthesis Initiation II	0.94	0.39	0.5	NaN	FASN
Glycine Degradation (Creatine Biosynthesis)	0.94	0.39	0.5	NaN	GAMT
Cysteine Biosynthesis/Homocysteine Degradation	0.94	0.39	0.5	NaN	CBS/CBSL
Threonine Degradation II	0.94	0.39	0.5	NaN	GCAT
Adenine and Adenosine Salvage I	0.94	0.39	0.5	NaN	PNP
Putrescine Biosynthesis III	0.94	0.39	0.5	NaN	ODC1
Glycine Biosynthesis I	0.94	0.39	0.5	NaN	SHMT2
G Protein Signaling Mediated by Tubby	0.928	0.381	0.125	NaN	GNG4,GNB2,TUB,GNB1L
IL-8 Signaling	0.907	0.363	0.0812	NaN	GNG4,GNA12,GNAI1,FGFR2,PLD6,RAC3,EIF4EBP1,BRAF,ARRB2,MAPK3,FGFR4,PRKCD,GNB2,PRKCH,GNB1L,ITGB5
IL-9 Signaling	0.902	0.363	0.111	NaN	FGFR4,SOCS2,FGFR2,BCL3,TNF
TR/RXR Activation	0.901	0.363	0.0918	NaN	SREBF1,FGFR4,FASN,FGFR2,BCL3,PCK1,HIF1A,THRB,DIO3
3-phosphoinositide Biosynthesis	0.886	0.351	0.0815	NaN	WBP11,CDC25C,PTPN13,PPFIA3,FGFR2,PPM1K,PXYLP1,NUDT15,CDC25B,FGFR4,PTPN1,PPM1H,PGAM5,NUDT1,CDC25A
UDP-N-acetyl-D-galactosamine Biosynthesis II	0.87	0.338	0.182	NaN	GNPNAT1,GNPDA2
HIPPO signaling	0.867	0.338	0.093	NaN	TEAD4,PPP1R3D,PPP2R2A,PPP2R3B,PPP2R2C,SFN,SKP2,RASSF1
STAT3 Pathway	0.854	0.329	0.0959	NaN	MAPK3,FGFR4,SOCS2,FGFR2,BMPR1B,TNFRSF11A,CDC25A
Endothelin-1 Signaling	0.845	0.327	0.0802	NaN	ADCY2,GNA12,ADCY3,GNAI1,MAPK6,FGFR2,GNAZ,PLD6,BRAF,MAPK3,FGFR4,PRKCD,PRKCH,ADCY7,CASP7
HIF1α Signaling	0.844	0.327	0.087	NaN	EGLN2,MAPK3,RBX1,FGFR4,MMP15,MAPK6,FGFR2,HIF1A,MMP25,MMP17
nNOS Signaling in Neurons	0.844	0.327	0.106	NaN	NOS1AP,CAPN6,CAPN11,PRKCD,PRKCH
Germ Cell-Sertoli Cell Junction Signaling	0.836	0.322	0.0809	NaN	TUBA1B,MAP3K6,TUBB4B,TUBG1,TUBB2A,TUBA4A,FGFR2,TUBB,RAC3,TUBB2B,MAPK3,FGFR4,ACTG1,TNF
HER-2 Signaling in Breast Cancer	0.826	0.315	0.0909	NaN	BAD,FGFR4,PRKCD,PARD6B,FGFR2,PRKCH,CDKN1B,ITGB5
Glutaryl-CoA Degradation	0.807	0.301	0.167	NaN	ACAT1,HADH
Chronic Myeloid Leukemia Signaling	0.79	0.301	0.0865	NaN	BAD,MAPK3,FGFR4,SUV39H1,HDAC1,E2F1,FGFR2,CDKN1B,RBL1
Dopamine-DARPP32 Feedback in cAMP Signaling	0.786	0.301	0.0802	NaN	ADCY2,PPP2R2A,ADCY3,GNAI1,PPP2R3B,KCNJ11,PPP1R3D,PRKAR2B,PRKCD,ATF4,PRKCH,PPP2R2C,ADCY7
Role of NFAT in Cardiac Hypertrophy	0.78	0.301	0.0781	NaN	GNG4,ADCY2,HDAC1,ADCY3,GNAI1,FGFR2,PRKAR2B,MAPK3,FGFR4,PRKCD,GNB2,PRKCH,GNB1L,ADCY7,GATA4
Tumoricidal Function of Hepatic Natural Killer Cells	0.778	0.301	0.125	NaN	BID,CASP7,DFFA
Diphthamide Biosynthesis	0.777	0.301	0.333	NaN	DPH6
5-aminoimidazole Ribonucleotide Biosynthesis I	0.777	0.301	0.333	NaN	PPAT
Thyronamine and Iodothyronamine Metabolism	0.777	0.301	0.333	NaN	DIO3
Thyroid Hormone Metabolism I (via Deiodination)	0.777	0.301	0.333	NaN	DIO3
1D-myo-inositol Hexakisphosphate Biosynthesis V (from Ins(1,3,4)P3)	0.777	0.301	0.333	NaN	IPPK
Glutamate Degradation II	0.777	0.301	0.333	NaN	GOT2
N-acetylglucosamine Degradation I	0.777	0.301	0.333	NaN	GNPDA2
Aspartate Biosynthesis	0.777	0.301	0.333	NaN	GOT2
Renin-Angiotensin Signaling	0.762	0.289	0.0833	NaN	ADCY2,PRKAR2B,MAPK3,FGFR4,PRKCD,ADCY3,FGFR2,PRKCH,TNF,ADCY7
Reelin Signaling in Neurons	0.751	0.289	0.087	NaN	FGFR4,CNR1,ARHGEF16,MAPK8IP2,ITGA5,FGFR2,LRP8,ARHGEF2
Choline Biosynthesis III	0.751	0.289	0.154	NaN	CHPT1,PLD6
Oleate Biosynthesis II (Animals)	0.751	0.289	0.154	NaN	SCD,UFSP2
Mevalonate Pathway I	0.751	0.289	0.154	NaN	MVD,ACAT1
Glycolysis I	0.741	0.284	0.12	NaN	ENO2,FBP1,ALDOC
Gluconeogenesis I	0.741	0.284	0.12	NaN	ENO2,FBP1,ALDOC
Huntington's Disease Signaling	0.735	0.284	0.0747	NaN	POLR2I,GNG4,CAPN6,CAPN11,HDAC1,HSPA6,FGFR2,UBE2S,HSPA2,POLR2G,MAPK3,FGFR4,PRKCD,GNB2,ATF4,PRKCH,GNB1L,CASP7
Fcγ Receptor-mediated Phagocytosis in Macrophages and Monocytes	0.734	0.284	0.086	NaN	MAPK3,SYK,PRKCD,PRKCH,PLD6,RAC3,ACTG1,FCGR3A/FCGR3B
ILK Signaling	0.731	0.284	0.0765	NaN	MYH10,PPP2R2A,IRS4,FGFR2,PPP2R3B,HIF1A,MAPK3,FGFR4,ATF4,RPS6KA4,LEF1,PPP2R2C,ACTG1,TNF,ITGB5
Role of NANOG in Mammalian Embryonic Stem Cell Pluripotency	0.731	0.284	0.082	NaN	FZD8,FZD10,WNT10B,MAPK3,FGFR4,DVL1,FGFR2,BMP7,BMPR1B,GATA4
PI3K/AKT Signaling	0.701	0.263	0.0806	NaN	BAD,PPP2R2A,MAPK3,GDF15,ITGA5,PPP2R3B,PPP2R2C,CDKN1B,SFN,EIF4EBP1
Isoleucine Degradation I	0.7	0.263	0.143	NaN	ACAT1,ACADSB
Superpathway of Citrulline Metabolism	0.7	0.263	0.143	NaN	OAT,ARG2
Urate Biosynthesis/Inosine 5'-phosphate Degradation	0.7	0.263	0.143	NaN	IMPDH2,PNP
Macropinocytosis Signaling	0.693	0.258	0.0864	NaN	FGFR4,PRKCD,ITGA5,FGFR2,PRKCH,PDGFB,ITGB5
Tec Kinase Signaling	0.683	0.25	0.0765	NaN	GNG4,GNA12,GNAI1,ITGA5,FGFR2,GNAZ,PRKCD,FGFR4,GNB2,PRKCH,GNB1L,ACTG1,TNF
Telomerase Signaling	0.676	0.25	0.0811	NaN	PPP2R2A,MAPK3,FGFR4,HDAC1,E2F1,DKC1,PPP2R3B,FGFR2,PPP2R2C
Airway Inflammation in Asthma	0.665	0.25	0.25	NaN	TNF
Arsenate Detoxification I (Glutaredoxin)	0.665	0.25	0.25	NaN	PNP
2-ketoglutarate Dehydrogenase Complex	0.665	0.25	0.25	NaN	DHTKD1
Myo-inositol Biosynthesis	0.665	0.25	0.25	NaN	IMPA2
Proline Biosynthesis I	0.665	0.25	0.25	NaN	PYCR3
L-cysteine Degradation I	0.665	0.25	0.25	NaN	GOT2
N-acetylglucosamine Degradation II	0.665	0.25	0.25	NaN	GNPDA2
Prolactin Signaling	0.658	0.246	0.0843	NaN	MAPK3,FGFR4,PRKCD,SOCS2,FGFR2,PRKCH,CEBPB
CCR5 Signaling in Macrophages	0.652	0.244	0.087	NaN	GNG4,PRKCD,GNB2,GNAI1,PRKCH,GNB1L
ErbB2-ErbB3 Signaling	0.652	0.244	0.087	NaN	BAD,MAPK3,FGFR4,ETV4,FGFR2,CDKN1B
RhoGDI Signaling	0.648	0.243	0.0751	NaN	GNG4,GNA12,GNAI1,ITGA5,GRIP1,GNAZ,ARHGEF16,GNB2,ARHGEF2,ARHGDIA,GNB1L,ESR1,ACTG1
Agranulocyte Adhesion and Diapedesis	0.639	0.24	0.0741	NaN	MYH10,CD99,CXCR4,CCL3L3,MMP15,CKLF,GNAI1,ITGA5,IL1R1,MMP25,TNF,ACTG1,MMP17,C5
Ephrin Receptor Signaling	0.636	0.24	0.0747	NaN	GNG4,CXCR4,PTPN13,GNA12,GNAI1,ITGA5,GNAZ,RAC3,PDGFB,MAPK3,GNB2,ATF4,GNB1L
CTLA4 Signaling in Cytotoxic T Lymphocytes	0.635	0.24	0.0808	NaN	AP1M2,PPP2R2A,FGFR4,AP1S2,SYK,PPP2R3B,FGFR2,PPP2R2C
FAK Signaling	0.635	0.24	0.0808	NaN	CAPN6,CAPN11,MAPK3,FGFR4,HMMR,ITGA5,FGFR2,ACTG1
Glioblastoma Multiforme Signaling	0.634	0.24	0.0755	NaN	FZD8,FZD10,WNT10B,MAPK3,FGFR4,PRKCD,E2F1,FGFR2,LEF1,CDKN1B,PDGFB,CDK2
GNRH Signaling	0.632	0.24	0.0775	NaN	ADCY2,PRKAR2B,MAP3K6,MAPK3,PRKCD,ADCY3,GNAI1,ATF4,PRKCH,ADCY7
UVC-Induced MAPK Signaling	0.628	0.239	0.0952	NaN	BRAF,MAPK3,PRKCD,PRKCH
FLT3 Signaling in Hematopoietic Progenitor Cells	0.625	0.239	0.0824	NaN	BAD,MAPK3,FGFR4,ATF4,FGFR2,RPS6KA4,EIF4EBP1
Leptin Signaling in Obesity	0.625	0.239	0.0824	NaN	ADCY2,PRKAR2B,MAPK3,FGFR4,ADCY3,FGFR2,ADCY7
Melatonin Signaling	0.615	0.236	0.0845	NaN	BRAF,PRKAR2B,MAPK3,PRKCD,GNAI1,PRKCH
Role of JAK1 and JAK3 in γc Cytokine Signaling	0.615	0.236	0.0845	NaN	IL4R,MAPK3,FGFR4,SYK,IRS4,FGFR2
RAN Signaling	0.613	0.236	0.125	NaN	RANBP1,KPNA2
Methylglyoxal Degradation III	0.613	0.236	0.125	NaN	AKR7A3,FAM213B
NF-κB Activation by Viruses	0.609	0.235	0.0814	NaN	MAPK3,FGFR4,PRKCD,ITGA5,FGFR2,PRKCH,ITGB5
Epithelial Adherens Junction Signaling	0.608	0.235	0.0753	NaN	MYH10,TUBA1B,TUBB4B,TUBG1,TUBB2A,TUBA4A,SSX2IP,LEF1,TUBB,ACTG1,TUBB2B
Basal Cell Carcinoma Signaling	0.597	0.232	0.0833	NaN	FZD8,FZD10,WNT10B,DVL1,BMP7,LEF1
GPCR-Mediated Integration of Enteroendocrine Signaling Exemplified by an L Cell	0.597	0.232	0.0833	NaN	ADCY2,PRKAR2B,ADCY3,GNAI1,ADCY7,PYY
Bladder Cancer Signaling	0.593	0.232	0.0805	NaN	MAPK3,SUV39H1,MMP15,E2F1,MMP25,MMP17,RASSF1
PPARα/RXRα Activation	0.592	0.232	0.073	NaN	ADCY2,ADCY3,CKAP5,BCL3,IL1R1,PRKAR2B,GK,MAPK3,FASN,PRKAA2,GOT2,ADCY7,ITGB5
Virus Entry via Endocytic Pathways	0.591	0.232	0.0784	NaN	FGFR4,PRKCD,ITGA5,FGFR2,PRKCH,RAC3,ACTG1,ITGB5
Triacylglycerol Biosynthesis	0.582	0.232	0.0909	NaN	AGPAT5,MBOAT1,ELOVL2,ELOVL6
Tetrahydrofolate Salvage from 5,10-methenyltetrahydrofolate	0.58	0.232	0.2	NaN	MTHFD1
Serine Biosynthesis	0.58	0.232	0.2	NaN	PHGDH
Tetrapyrrole Biosynthesis II	0.58	0.232	0.2	NaN	HMBS
Eumelanin Biosynthesis	0.58	0.232	0.2	NaN	MIF
Lysine Degradation II	0.58	0.232	0.2	NaN	AASS
Neuregulin Signaling	0.577	0.232	0.0795	NaN	RPS6,BAD,MAPK3,PRKCD,ITGA5,PRKCH,CDKN1B
VEGF Signaling	0.577	0.232	0.0777	NaN	BAD,MAPK3,FGFR4,FGFR2,HIF1A,SFN,ACTG1,EIF2S2
Superpathway of Geranylgeranyldiphosphate Biosynthesis I (via Mevalonate)	0.575	0.232	0.118	NaN	MVD,ACAT1
Axonal Guidance Signaling	0.575	0.232	0.067	NaN	TUBA1B,FZD10,WNT10B,SLIT1,TUBB,ROBO1,NTN1,TUBB2B,FGFR4,MAPK3,GNB1L,GNG4,CXCR4,TUBB4B,GNA12,TUBB2A,TUBG1,TUBA4A,GNAI1,ITGA5,FGFR2,GNAZ,RAC3,PDGFB,FZD8,PRKAR2B,PRKCD,GNB2,PRKCH,BMP7
MSP-RON Signaling Pathway	0.569	0.229	0.0847	NaN	F12,FGFR4,FGFR2,TNF,ACTG1
phagosome maturation	0.553	0.214	0.075	NaN	TUBA1B,DYNLL1,TUBB4B,TUBG1,TUBB2A,TUBA4A,TUBB,VPS37C,TUBB2B
Induction of Apoptosis by HIV1	0.551	0.214	0.0833	NaN	CXCR4,BID,SLC25A10,TNF,DFFA
Role of Macrophages, Fibroblasts and Endothelial Cells in Rheumatoid Arthritis	0.543	0.209	0.068	NaN	FZD10,MIF,WNT10B,DVL1,FGFR2,CEBPB,IL1R1,CEBPG,PDGFB,PRSS1,C5,FZD8,MAPK3,FGFR4,PRKCD,CEBPA,ATF4,PRKCH,LEF1,TNF,FCGR3A/FCGR3B
fMLP Signaling in Neutrophils	0.541	0.209	0.0744	NaN	GNG4,MAPK3,FGFR4,PRKCD,GNB2,GNAI1,FGFR2,PRKCH,GNB1L
Mouse Embryonic Stem Cell Pluripotency	0.537	0.209	0.0755	NaN	FZD8,FZD10,ID2,MAPK3,FGFR4,DVL1,FGFR2,LEF1
IGF-1 Signaling	0.537	0.209	0.0755	NaN	IGFBP4,PRKAR2B,BAD,MAPK3,FGFR4,SOCS2,FGFR2,SFN
Cytotoxic T Lymphocyte-mediated Apoptosis of Target Cells	0.532	0.209	0.0938	NaN	BID,CASP7,DFFA
IL-15 Signaling	0.532	0.209	0.0789	NaN	MAPK3,FGFR4,SYK,FGFR2,RAC3,TNF
GDNF Family Ligand-Receptor Interactions	0.532	0.209	0.0789	NaN	NRTN,DOK4,MAPK3,FGFR4,GFRA1,FGFR2
Arginine Biosynthesis IV	0.514	0.203	0.167	NaN	OAT
Urea Cycle	0.514	0.203	0.167	NaN	ARG2
Glycerol Degradation I	0.514	0.203	0.167	NaN	GK
Selenocysteine Biosynthesis II (Archaea and Eukaryotes)	0.514	0.203	0.167	NaN	SARS
Ceramide Degradation	0.514	0.203	0.167	NaN	ACER2
Zymosterol Biosynthesis	0.514	0.203	0.167	NaN	LBR
Molybdenum Cofactor Biosynthesis	0.514	0.203	0.167	NaN	GPHN
VDR/RXR Activation	0.502	0.195	0.0769	NaN	PRKCD,CEBPA,PRKCH,HES1,CEBPB,CDKN1B
ERK5 Signaling	0.5	0.195	0.0794	NaN	BAD,GNA12,ATF4,RPS6KA4,SFN
PCP pathway	0.5	0.195	0.0794	NaN	FZD8,FZD10,WNT10B,DVL1,JUND
Cardiac Hypertrophy Signaling	0.499	0.195	0.0681	NaN	GNG4,ADCY2,MAP3K6,GNA12,ADCY3,GNAI1,FGFR2,GNAZ,PRKAR2B,MAPK3,FGFR4,GNB2,ADRA2C,GNB1L,ADCY7,GATA4
Insulin Receptor Signaling	0.49	0.188	0.0709	NaN	PPP1R3D,PRKAR2B,BAD,MAPK3,FGFR4,PTPN1,IRS4,FGFR2,ACLY,EIF4EBP1
Role of JAK2 in Hormone-like Cytokine Signaling	0.486	0.188	0.0882	NaN	PTPN1,IRS4,SOCS2
Endometrial Cancer Signaling	0.484	0.188	0.0781	NaN	BAD,MAPK3,FGFR4,FGFR2,LEF1
Regulation of the Epithelial-Mesenchymal Transition Pathway	0.484	0.188	0.0688	NaN	BRAF,FZD8,FZD10,GSC,ID2,WNT10B,MAPK3,FGFR4,DVL1,PARD6B,FGFR2,LEF1,HIF1A
Phospholipase C Signaling	0.482	0.188	0.0675	NaN	GNG4,ADCY2,HDAC1,ADCY3,ITGA5,PLD6,MAPK3,PRKCD,SYK,ARHGEF16,GNB2,ATF4,PRKCH,ARHGEF2,GNB1L,ADCY7
1D-myo-inositol Hexakisphosphate Biosynthesis II (Mammalian)	0.477	0.186	0.1	NaN	ITPKC,IPPK
Purine Nucleotides Degradation II (Aerobic)	0.477	0.186	0.1	NaN	IMPDH2,PNP
Xenobiotic Metabolism Signaling	0.476	0.186	0.0664	NaN	ALDH1B1,CYP1A1,SULT1C4,MAP3K6,PPP2R2A,MGMT,FGFR2,PPP2R3B,GRIP1,UST,MAPK3,RBX1,FGFR4,PRKCD,PRKCH,HS6ST3,PPP2R2C,ALDH3B2,TNF
Human Embryonic Stem Cell Pluripotency	0.469	0.184	0.0699	NaN	S1PR3,FZD8,FZD10,WNT10B,FGFR4,DVL1,FGFR2,BMP7,LEF1,PDGFB
Thrombopoietin Signaling	0.468	0.184	0.0769	NaN	MAPK3,FGFR4,PRKCD,FGFR2,PRKCH
Hypoxia Signaling in the Cardiovascular System	0.468	0.184	0.0769	NaN	UBE2M,ATF4,HIF1A,UBE2S,UBE2C
Nucleotide Excision Repair Pathway	0.465	0.183	0.0857	NaN	POLR2I,POLR2G,RPA1
Assembly of RNA Polymerase II Complex	0.465	0.183	0.08	NaN	POLR2I,POLR2G,TAF6,TAF5
Renal Cell Carcinoma Signaling	0.46	0.183	0.0741	NaN	MAPK3,RBX1,FGFR4,FGFR2,HIF1A,PDGFB
Phosphatidylcholine Biosynthesis I	0.459	0.183	0.143	NaN	CHPT1
Aspartate Degradation II	0.459	0.183	0.143	NaN	GOT2
Tryptophan Degradation III (Eukaryotic)	0.449	0.18	0.0952	NaN	ACAT1,HADH
NRF2-mediated Oxidative Stress Response	0.449	0.18	0.0674	NaN	AKR7A3,FGFR2,CLPP,MAFF,MAPK3,PRKCD,FGFR4,RBX1,ATF4,DNAJA3,JUND,PRKCH,ACTG1
Production of Nitric Oxide and Reactive Oxygen Species in Macrophages	0.449	0.18	0.0674	NaN	MAP3K6,PPP2R2A,FGFR2,PPP2R3B,ARG2,PPP1R3D,ALB,MAPK3,PRKCD,FGFR4,PPP2R2C,PRKCH,TNF
Granulocyte Adhesion and Diapedesis	0.449	0.18	0.0678	NaN	CD99,CCL3L3,CXCR4,MMP15,CKLF,GNAI1,ITGA5,IL1R1,MMP25,TNF,MMP17,C5
Amyloid Processing	0.448	0.18	0.0784	NaN	CAPN6,PRKAR2B,CAPN11,MAPK3
CCR3 Signaling in Eosinophils	0.44	0.174	0.0692	NaN	GNG4,MAPK3,FGFR4,PRKCD,GNB2,GNAI1,FGFR2,PRKCH,GNB1L
GABA Receptor Signaling	0.439	0.174	0.0746	NaN	ADCY2,GPR37,ADCY3,GPHN,ADCY7
IL-3 Signaling	0.434	0.173	0.0723	NaN	BAD,MAPK3,FGFR4,PRKCD,FGFR2,PRKCH
JAK/Stat Signaling	0.434	0.173	0.0723	NaN	MAPK3,FGFR4,PTPN1,SOCS2,FGFR2,CEBPB
Docosahexaenoic Acid (DHA) Signaling	0.431	0.172	0.0769	NaN	BAD,FGFR4,BID,FGFR2
HGF Signaling	0.431	0.172	0.0696	NaN	MAP3K6,MAPK3,FGFR4,PRKCD,ITGA5,FGFR2,PRKCH,CDK2
Airway Pathology in Chronic Obstructive Pulmonary Disease	0.413	0.165	0.125	NaN	TNF
Sphingosine and Sphingosine-1-phosphate Metabolism	0.413	0.165	0.125	NaN	ACER2
Histidine Degradation III	0.413	0.165	0.125	NaN	MTHFD1
Inositol Pyrophosphates Biosynthesis	0.413	0.165	0.125	NaN	IPPK
Purine Ribonucleosides Degradation to Ribose-1-phosphate	0.413	0.165	0.125	NaN	PNP
Sphingomyelin Metabolism	0.413	0.165	0.125	NaN	SGMS2
Agrin Interactions at Neuromuscular Junction	0.411	0.165	0.0725	NaN	MAPK3,DVL1,ITGA5,RAC3,ACTG1
p38 MAPK Signaling	0.41	0.165	0.0684	NaN	CDC25B,DDIT3,HIST1H3C,ATF4,RPS6KA4,IL1R1,TNF,HIST2H3C
PAK Signaling	0.409	0.165	0.0693	NaN	ARHGAP10,MAPK3,FGFR4,ITGA5,FGFR2,TNF,PDGFB
Signaling by Rho Family GTPases	0.408	0.165	0.0648	NaN	GNG4,GNA12,GNAI1,ITGA5,FGFR2,GNAZ,SEPT11,PKN1,MAPK3,FGFR4,ARHGEF16,CIT,GNB2,ARHGEF2,GNB1L,ACTG1
Notch Signaling	0.406	0.165	0.0789	NaN	HES1,HEY2,NUMBL
Aldosterone Signaling in Epithelial Cells	0.405	0.165	0.0663	NaN	MAPK3,FGFR4,HSPH1,PRKCD,HSPA6,FGFR2,PRKCH,HSPD1,HSPA2,AHCY,HSPA4L
Role of NFAT in Regulation of the Immune Response	0.399	0.163	0.0656	NaN	GNG4,MAPK3,FGFR4,GNA12,SYK,GNB2,GNAI1,FGFR2,GNAZ,GNB1L,FCGR3A/FCGR3B,GATA4
Myc Mediated Apoptosis Signaling	0.398	0.163	0.0714	NaN	BAD,FGFR4,BID,FGFR2,SFN
Glioma Invasiveness Signaling	0.398	0.163	0.0714	NaN	MAPK3,FGFR4,HMMR,FGFR2,ITGB5
Fc Epsilon RI Signaling	0.39	0.158	0.0672	NaN	MAPK3,FGFR4,SYK,PRKCD,FGFR2,PRKCH,RAC3,TNF
Netrin Signaling	0.389	0.158	0.0769	NaN	PRKAR2B,RAC3,NTN1
Inhibition of Matrix Metalloproteases	0.389	0.158	0.0769	NaN	MMP15,MMP25,MMP17
Caveolar-mediated Endocytosis Signaling	0.386	0.157	0.0704	NaN	ALB,PTPN1,ITGA5,ACTG1,ITGB5
SAPK/JNK Signaling	0.378	0.155	0.0673	NaN	FGFR4,GNA12,MAPK8IP2,MAP3K20,FGFR2,DUSP4,RAC3
CDP-diacylglycerol Biosynthesis I	0.377	0.155	0.0833	NaN	AGPAT5,MBOAT1
Sucrose Degradation V (Mammalian)	0.374	0.155	0.111	NaN	ALDOC
Heme Biosynthesis II	0.374	0.155	0.111	NaN	HMBS
Ketolysis	0.374	0.155	0.111	NaN	ACAT1
Role of Pattern Recognition Receptors in Recognition of Bacteria and Viruses	0.374	0.155	0.0657	NaN	MAPK3,IL17D,FGFR4,SYK,PRKCD,FGFR2,PRKCH,TNF,C5
ErbB4 Signaling	0.373	0.155	0.0694	NaN	MAPK3,FGFR4,PRKCD,FGFR2,PRKCH
Thyroid Cancer Signaling	0.372	0.155	0.075	NaN	BRAF,MAPK3,LEF1
LXR/RXR Activation	0.371	0.155	0.0661	NaN	SCD,ALB,SREBF1,FASN,ARG2,IL1R1,TNF,HADH
Glucocorticoid Receptor Signaling	0.362	0.149	0.0627	NaN	POLR2I,TAF6,HSPA6,FGFR2,PCK1,CEBPB,HSPA2,POLR2G,HMGB1,PCK2,TAF5,MAPK3,FGFR4,CEBPA,FKBP4,PRKAA2,ESR1,TNF
Natural Killer Cell Signaling	0.362	0.149	0.0656	NaN	MAPK3,FGFR4,SYK,PRKCD,FGFR2,PRKCH,RAC3,FCGR3A/FCGR3B
Wnt/Ca+ pathway	0.358	0.148	0.0702	NaN	FZD8,FZD10,DVL1,ATF4
IL-17A Signaling in Gastric Cells	0.356	0.148	0.08	NaN	MAPK3,TNF
Superpathway of D-myo-inositol (1,4,5)-trisphosphate Metabolism	0.356	0.148	0.08	NaN	ITPKC,IMPA2
Protein Ubiquitination Pathway	0.355	0.148	0.0627	NaN	UBE2M,CDC20,HSPH1,USP36,PSMD5,HSPA6,THOP1,HSPD1,UBE2S,HSPA2,SKP2,STUB1,RBX1,BRCA1,HSPA4L,UBE2C
Embryonic Stem Cell Differentiation into Cardiac Lineages	0.34	0.139	0.1	NaN	GATA4
Ketogenesis	0.34	0.139	0.1	NaN	ACAT1
Calcium Transport I	0.34	0.139	0.1	NaN	ATP2C2
Glycine Betaine Degradation	0.34	0.139	0.1	NaN	SHMT2
Phosphatidylglycerol Biosynthesis II (Non-plastidic)	0.337	0.137	0.0769	NaN	AGPAT5,MBOAT1
Death Receptor Signaling	0.334	0.136	0.0652	NaN	BID,PARP8,TNF,ACTG1,CASP7,DFFA
Role of Wnt/GSK-3β Signaling in the Pathogenesis of Influenza	0.328	0.136	0.0658	NaN	FZD8,FZD10,WNT10B,DVL1,LEF1
Neurotrophin/TRK Signaling	0.328	0.136	0.0658	NaN	SPRY1,MAPK3,FGFR4,ATF4,FGFR2
BMP signaling pathway	0.328	0.136	0.0658	NaN	PRKAR2B,MAPK3,BMP7,BMPR1B,CHRD
FXR/RXR Activation	0.327	0.136	0.0635	NaN	ALB,PCK2,SREBF1,FGFR4,FASN,RARA,FBP1,TNF
Role of p14/p19ARF in Tumor Suppression	0.326	0.136	0.0698	NaN	FGFR4,E2F1,FGFR2
Serotonin Receptor Signaling	0.326	0.136	0.0698	NaN	ADCY2,ADCY3,ADCY7
Leukocyte Extravasation Signaling	0.324	0.135	0.0619	NaN	CD99,CXCR4,MMP15,GNAI1,ITGA5,FGFR2,MMP25,ICAM3,PRKCD,FGFR4,PRKCH,ACTG1,MMP17
Acetone Degradation I (to Methylglyoxal)	0.319	0.131	0.0741	NaN	CYP1A1,FAM213B
Estrogen-Dependent Breast Cancer Signaling	0.317	0.131	0.0649	NaN	MAPK3,FGFR4,ATF4,FGFR2,ESR1
Role of IL-17F in Allergic Inflammatory Airway Diseases	0.312	0.127	0.0682	NaN	MAPK3,ATF4,RPS6KA4
Mineralocorticoid Biosynthesis	0.311	0.127	0.0909	NaN	EBP
Retinoic acid Mediated Apoptosis Signaling	0.309	0.127	0.0656	NaN	RARA,RARB,BID,PARP8
Synaptic Long Term Depression	0.302	0.121	0.0616	NaN	PPP2R2A,MAPK3,GNA12,PRKCD,GNAI1,PPP2R3B,PRKCH,PPP2R2C,GNAZ
Erythropoietin Signaling	0.297	0.118	0.0633	NaN	MAPK3,FGFR4,PRKCD,FGFR2,PRKCH
Nitric Oxide Signaling in the Cardiovascular System	0.296	0.118	0.0619	NaN	PRKAR2B,MAPK3,FGFR4,PRKCD,FGFR2,PRKCH,ARG2
Role of Osteoblasts, Osteoclasts and Chondrocytes in Rheumatoid Arthritis	0.293	0.116	0.0603	NaN	FZD10,WNT10B,BAD,DVL1,FGFR2,ITGA5,IL1R1,TNFRSF11A,FZD8,MAPK3,FGFR4,LEF1,BMP7,TNF
Neuropathic Pain Signaling In Dorsal Horn Neurons	0.288	0.116	0.0614	NaN	PRKAR2B,GPR37,MAPK3,FGFR4,PRKCD,FGFR2,PRKCH
CNTF Signaling	0.287	0.116	0.0635	NaN	MAPK3,FGFR4,FGFR2,RPS6KA4
Role of Oct4 in Mammalian Embryonic Stem Cell Pluripotency	0.286	0.116	0.0652	NaN	CCNF,RARA,BRCA1
Dermatan Sulfate Biosynthesis (Late Stages)	0.286	0.116	0.0652	NaN	SULT1C4,UST,HS6ST3
Acyl-CoA Hydrolysis	0.285	0.116	0.0833	NaN	ACOT7
Glucocorticoid Biosynthesis	0.285	0.116	0.0833	NaN	EBP
Calcium-induced T Lymphocyte Apoptosis	0.277	0.11	0.0625	NaN	PRKCD,HDAC1,NR4A1,PRKCH
IL-2 Signaling	0.277	0.11	0.0625	NaN	MAPK3,FGFR4,SYK,FGFR2
Tight Junction Signaling	0.275	0.11	0.0599	NaN	MYH10,PRKAR2B,PPP2R2A,CEBPA,PPP2R3B,PPP2R2C,ARHGEF2,TNF,ACTG1,OCLN
HMGB1 Signaling	0.273	0.11	0.0602	NaN	HMGB1,MAPK3,IL17D,FGFR4,FGFR2,IL1R1,KAT2A,TNF
PXR/RXR Activation	0.267	0.104	0.0615	NaN	SCD,PRKAR2B,PCK2,TNF
NGF Signaling	0.265	0.104	0.0598	NaN	MAP3K6,MAPK3,FGFR4,PRKCD,ATF4,FGFR2,RPS6KA4
Fatty Acid Activation	0.262	0.104	0.0769	NaN	SLC27A4
NAD Phosphorylation and Dephosphorylation	0.262	0.104	0.0769	NaN	PXYLP1
Guanosine Nucleotides Degradation III	0.262	0.104	0.0769	NaN	PNP
TNFR1 Signaling	0.251	0.0964	0.0612	NaN	BID,TNF,CASP7
Chondroitin Sulfate Biosynthesis (Late Stages)	0.251	0.0964	0.0612	NaN	SULT1C4,UST,HS6ST3
Fatty Acid β-oxidation I	0.242	0.0908	0.0625	NaN	SLC27A4,HADH
DNA Double-Strand Break Repair by Non-Homologous End Joining	0.241	0.0908	0.0714	NaN	XRCC1
Androgen Biosynthesis	0.241	0.0908	0.0714	NaN	EBP
Phenylalanine Degradation IV (Mammalian, via Side Chain)	0.241	0.0908	0.0714	NaN	GOT2
MIF-mediated Glucocorticoid Regulation	0.23	0.0809	0.0606	NaN	MIF,MAPK3
Extrinsic Prothrombin Activation Pathway	0.205	0.059	0.0625	NaN	F12
Parkinson's Signaling	0.205	0.059	0.0625	NaN	GPR37

## Sheet: SUM44 LTED down-reg pathway
Ingenuity Canonical Pathways	-log(p-value)	-log(B-H p-value)	Ratio	z-score	Molecules
Endothelin-1 Signaling	7.16	4.5	0.171	NaN	PIK3R1,ADCY4,CASP4,PLCH2,NOS3,MAPK11,HMOX1,PLCE1,JUN,LCAT,EDN1,PLA2G2F,CASQ1,CASP1,PLCL1,CASP14,CASP10,PLA2G4C,PIK3C2G,PLCL2,ITPR1,PLA2G2A,PIK3R3,FOS,PLA2G4D,IRS1,PLCG2,ADCY1,SHC2,GUCY1A2,RARRES3,ADCY10
Sphingosine-1-phosphate Signaling	6.09	3.73	0.189	NaN	PTK2B,ADCY4,PIK3R1,PIK3C2G,CASP4,SMPD1,PLCL2,PLCH2,PIK3R3,PLCE1,PLCG2,IRS1,ADCY1,CASQ1,RHOU,CASP1,SPHK1,AKT3,PLCL1,ADCY10,FNBP1,CASP14,CASP10
Hepatic Fibrosis / Hepatic Stellate Cell Activation	5.36	3.17	0.153	NaN	CCR5,COL4A5,COL10A1,COL17A1,COL5A1,TGFBR2,COL16A1,CXCL3,EDN1,CCL2,TIMP1,NGFR,TGFB2,SERPINE1,IL1RAP,COL27A1,CXCL8,VCAM1,IFNGR1,FGF1,MET,IGF2,COL21A1,CSF1,COL23A1,COL11A1,COL9A2,A2M
Antigen Presentation Pathway	5.17	3.16	0.297	NaN	B2M,HLA-DRB1,HLA-DMA,HLA-A,HLA-DMB,CIITA,CD74,HLA-F,HLA-DQA2,HLA-E,MR1
Xenobiotic Metabolism Signaling	5.08	3.16	0.129	NaN	CYP3A7,UGT1A6,PIK3R1,GCLC,FMO5,MAPK11,SOD3,SULT1A2,HMOX1,HS6ST1,UGT1A5,MAOB,CES1,ALDH1A3,SULT1A3/SULT1A4,CAMK1G,MAP3K7,CHST3,HS6ST2,FMO1,FMO4,AHR,GSTK1,FMO3,FMO2,MAP3K1,PIK3C2G,UGT1A4,HDAC5,PIK3R3,SULT1E1,PPP2R3A,SMOX,IRS1,UGT1A7 (includes others),PPARGC1A,MAOA
Dendritic Cell Maturation	5.04	3.16	0.147	NaN	B2M,HLA-A,PIK3R1,IL32,LTB,COL10A1,CD83,PLCH2,MAPK11,FCGR1A,HLA-DRB1,PLCE1,HLA-DMA,NGFR,HLA-DMB,AKT3,PLCL1,FCGR2A,PIK3C2G,IKBKE,PLCL2,CREB5,STAT4,PIK3R3,IL18,FSCN1,IRS1,PLCG2
Nicotine Degradation II	4.78	2.97	0.222	NaN	CYP3A7,FMO3,CYP4F8,UGT1A6,FMO2,UGT1A4,FMO5,UGT1A5,CYP4X1,FMO1,CYP2J2,AOX1,FMO4,UGT1A7 (includes others)
Inhibition of Angiogenesis by TSP1	4.7	2.95	0.294	NaN	TGFBR2,FYN,CD47,JUN,SDC2,CD36,GUCY1A2,AKT3,NOS3,MAPK11
Acute Phase Response Signaling	4.6	2.91	0.148	NaN	SOCS1,C3,PIK3R1,MAP3K1,SERPINF1,VWF,IKBKE,SAA2,STAT3,MAPK11,PIK3R3,C1R,C4A/C4B,HMOX1,FOS,IL18,JUN,F8,NGFR,MAP3K7,AKT3,SERPINA1,SERPINE1,A2M,IL1RAP
Role of NFAT in Cardiac Hypertrophy	4.51	2.91	0.141	NaN	PIK3R1,ADCY4,PLCH2,MAPK11,TGFBR2,PLCE1,CAMK1G,MAP3K7,TGFB2,AKT3,PLCL1,GNG12,HDAC9,MAP3K1,PIK3C2G,PLCL2,ITPR1,NFATC4,HDAC5,PIK3R3,RCAN1,IRS1,PLCG2,ADCY1,ADCY10,SLC8A1,RCAN2
G-Protein Coupled Receptor Signaling	4.48	2.91	0.126	NaN	ENPP6,FYN,HCAR3,PTK2B,DUSP6,PIK3R1,ADCY4,HRH1,PDE7B,AKT3,ADORA2B,ADORA1,PDE11A,RASA1,HCAR2,ADRB2,RGS2,PDE9A,RGS16,PIK3C2G,IKBKE,STAT3,PDE4B,CREB5,XCR1,PIK3R3,GPER1,NPR3,RASGRP1,IRS1,ADCY1,CALCR,ADCY10,ADORA2A
Axonal Guidance Signaling	4.47	2.91	0.109	NaN	FYN,LRRC4C,RND1,BDNF,PIK3R1,WNT6,PLXNA2,PLCH2,SEMA6C,EPHB6,NTNG1,EFNB2,MICAL1,ITGA3,PLCE1,SDC2,ADAM28,NGFR,ABLIM3,NTRK1,PLXNB1,AKT3,PLCL1,RASA1,GDF7,GNG12,EPHA7,SEMA3E,SEMA3G,PAPPA,NRP2,WNT9A,PTCH1,PIK3C2G,PLCL2,NFATC4,BMP5,MET,PIK3R3,SRGAP3,WNT3A,NTRK2,ADAM12,PLCG2,IRS1,ARHGEF6,WNT11,FZD7,NRP1
Superpathway of Melatonin Degradation	4.46	2.91	0.209	NaN	CYP3A7,CYP4F8,UGT1A6,UGT1A4,SULT1A2,UGT1A5,MAOB,SULT1E1,SMOX,SULT1A3/SULT1A4,CYP4X1,CYP2J2,UGT1A7 (includes others),MAOA
Role of Macrophages, Fibroblasts and Endothelial Cells in Rheumatoid Arthritis	4.33	2.82	0.12	NaN	SOCS1,PIK3R1,IL32,LTB,WNT6,PLCH2,FCGR1A,PLCE1,JUN,CCL2,NGFR,TLR1,MAP3K7,AKT3,PLCL1,IL1RAP,CXCL8,TNFSF11,VCAM1,WNT9A,PIK3C2G,IKBKE,PLCL2,STAT3,NFATC4,CREB5,IL16,PIK3R3,FOS,IL18,WNT3A,CSF1,PLCG2,IRS1,DKK1,WNT11,FZD7
Role of Osteoblasts, Osteoclasts and Chondrocytes in Rheumatoid Arthritis	4.24	2.78	0.129	NaN	PTK2B,PIK3R1,WNT6,ACP5,ITGA3,JUN,NGFR,MAP3K7,AKT3,BIRC3,IL1RAP,ALPL,NAIP,CTSK,TNFSF11,WNT9A,PIK3C2G,IKBKE,NFATC4,BMP5,PIK3R3,FOS,IL18,WNT3A,CSF1,IRS1,CALCR,DKK1,WNT11,FZD7
LPS/IL-1 Mediated Inhibition of RXR Function	4.23	2.78	0.131	NaN	CYP3A7,FMO5,ABCA1,SOD3,SULT1A2,HS6ST1,MAOB,JUN,ALDH1A3,NGFR,SULT1A3/SULT1A4,MAP3K7,CHST3,HS6ST2,PPARGC1B,ABCB11,ACSL4,FMO1,IL1RAP,FMO4,GSTK1,FMO3,FMO2,MAP3K1,IL18,SULT1E1,SMOX,PPARGC1A,MAOA
Atherosclerosis Signaling	4.19	2.76	0.157	NaN	CCR3,CXCL8,VCAM1,CD36,PLA2G4C,COL10A1,CCR2,PLA2G2A,ITGB2,IL18,PLA2G4D,LCAT,CCL2,PLA2G2F,CSF1,RARRES3,SERPINA1,S100A8,CLU,APOD
UVA-Induced MAPK Signaling	3.96	2.55	0.167	NaN	PIK3R1,PARP4,PIK3C2G,SMPD1,PLCL2,PLCH2,MAPK11,PIK3R3,FOS,RPS6KA6,JUN,PLCE1,IRS1,PLCG2,PARP11,RPS6KA2,PLCL1
Sperm Motility	3.8	2.45	0.152	NaN	PTK2B,PLA2G4C,PLCL2,ITPR1,PDE4B,PLCH2,FRK,PLA2G2A,PLA2G4D,PRKG1,PLCE1,LCAT,PLA2G2F,PLCG2,GUCY1A2,RARRES3,PLCL1,ADCY10,PTK7
Coagulation System	3.79	2.45	0.257	NaN	BDKRB2,F8,VWF,SERPINA1,F7,PLAU,SERPINE1,TFPI,A2M
IL-10 Signaling	3.77	2.45	0.191	NaN	CCR1,FOS,HMOX1,IL18,CCR5,JAK1,JUN,FCGR2A,MAP3K7,IKBKE,STAT3,MAPK11,IL1RAP
EGF Signaling	3.77	2.45	0.191	NaN	PIK3R3,FOS,JAK1,JUN,PIK3R1,IRS1,MAP3K1,PIK3C2G,AKT3,ITPR1,STAT3,RASA1,MAPK11
Interferon Signaling	3.69	2.39	0.25	NaN	IFITM3,SOCS1,IFIT3,IFIT1,OAS1,JAK1,IFI6,IRF9,IFNGR1
PI3K Signaling in B Lymphocytes	3.66	2.38	0.148	NaN	BLNK,FYN,C3,PIK3R1,IKBKE,PLCL2,ITPR1,NFATC4,PLEKHA4,PLCH2,FOS,JUN,PLCE1,DAPP1,IRS1,PLCG2,AKT3,PLEKHA2,PLCL1
Phospholipases	3.58	2.31	0.194	NaN	HMOX1,PLCE1,PLA2G4D,PLA2G2F,LCAT,PLCG2,PLA2G4C,RARRES3,PLCL2,PLCL1,PLCH2,PLA2G2A
Amyotrophic Lateral Sclerosis Signaling	3.5	2.26	0.153	NaN	PRPH,NAIP,CACNA1S,PIK3R1,PIK3C2G,CACNA1C,PIK3R3,CAPN8,GRIK4,IRS1,CASP1,AKT3,SLC1A2,CAPN2,CAPN9,BIRC3,CAPN3
Serotonin Degradation	3.39	2.16	0.176	NaN	UGT1A6,DHRS2,UGT1A4,SULT1A2,UGT1A5,MAOB,SULT1E1,SMOX,ALDH1A3,SULT1A3/SULT1A4,ADHFE1,UGT1A7 (includes others),MAOA
HGF Signaling	3.32	2.11	0.148	NaN	ETS1,PIK3R1,MAP3K1,PIK3C2G,STAT3,MET,PIK3R3,FOS,ITGA3,JUN,ELF3,ETS2,IRS1,PLCG2,CDKN1A,MAP3K7,AKT3
Leptin Signaling in Obesity	3.31	2.11	0.165	NaN	ADCY4,PIK3R1,PIK3C2G,STAT3,PLCL2,PLCH2,PIK3R3,PLCE1,IRS1,PLCG2,ADCY1,AKT3,PLCL1,ADCY10
Huntington's Disease Signaling	3.22	2.04	0.116	NaN	BDNF,PIK3R1,CASP4,JUN,NTRK1,CASQ1,CASP1,AKT3,RASA1,GNG12,CASP14,CASP10,HDAC9,PIK3C2G,DNM3,ITPR1,CREB5,SNAP25,RPH3A,HDAC5,UBD,PIK3R3,CAPN8,IRS1,CLTCL1,CAPN9,CAPN2,CAPN3
Role of IL-17A in Psoriasis	3.19	2.02	0.385	NaN	S100A7,CXCL8,CXCL3,S100A9,S100A8
VEGF Family Ligand-Receptor Interactions	3.15	2	0.159	NaN	PIK3R3,FOS,PLA2G4D,PLA2G2F,NRP2,PLCG2,PIK3R1,IRS1,PLA2G4C,PIK3C2G,AKT3,NOS3,PLA2G2A,NRP1
Cellular Effects of Sildenafil (Viagra)	3.13	1.99	0.138	NaN	CACNA1S,KCNN3,SLC4A11,ADCY4,CACNA1C,MYLK,PLCL2,ITPR1,PDE4B,NOS3,PLCH2,PRKG1,PLCE1,PLCG2,ADCY1,GUCY1A2,PLCL1,ADCY10
Renin-Angiotensin Signaling	3.1	1.97	0.142	NaN	PTK2B,ADCY4,PIK3R1,MAP3K1,PIK3C2G,ITPR1,STAT3,MAPK11,PIK3R3,FOS,JUN,CCL2,IRS1,PLCG2,SHC2,ADCY1,ADCY10
Melatonin Degradation II	3.09	1.97	0.75	NaN	MAOB,SMOX,MAOA
FGF Signaling	3.05	1.95	0.156	NaN	PIK3R1,MAP3K1,PIK3C2G,STAT3,ITPR1,CREB5,MAPK11,FGF1,PIK3R3,MET,IRS1,FGF12,AKT3,FGF7
Granulocyte Adhesion and Diapedesis	3.04	1.95	0.124	NaN	FPR3,CXCL8,SELL,VCAM1,MMP16,CCL24,SDC3,MMP24,CXCL10,CXCL3,HRH1,ITGB2,IL18,ITGA3,ITGAM,CCL2,SDC2,NGFR,CCL28,PECAM1,IL1RAP,MSN
Role of Tissue Factor in Cancer	3.02	1.95	0.139	NaN	CXCL8,FYN,PTK2B,EGR1,PIK3R1,PIK3C2G,HBEGF,F7,MAPK11,FRK,PIK3R3,ITGA3,RPS6KA6,CSF1,IRS1,AKT3,RPS6KA2
phagosome formation	3.02	1.95	0.139	NaN	FCGR2A,PIK3R1,PIK3C2G,PLCL2,PLCH2,FCGR1A,PIK3R3,ITGA3,PLCE1,SCARA3,IRS1,PLCG2,TLR1,RHOU,PLCL1,FNBP1,MARCO
HMGB1 Signaling	3.01	1.95	0.135	NaN	CXCL8,VCAM1,PIK3R1,PIK3C2G,IFNGR1,MAPK11,PIK3R3,FOS,IL18,JUN,CCL2,IRS1,NGFR,RHOU,TGFB2,AKT3,SERPINE1,FNBP1
Melatonin Degradation I	2.99	1.94	0.177	NaN	CYP3A7,UGT1A5,CYP4F8,SULT1E1,UGT1A6,SULT1A3/SULT1A4,CYP4X1,CYP2J2,UGT1A4,UGT1A7 (includes others),SULT1A2
GPCR-Mediated Integration of Enteroendocrine Signaling Exemplified by an L Cell	2.96	1.93	0.167	NaN	GIPR,PLCE1,GLP2R,PLCG2,ADCY4,ADCY1,PLCL2,ITPR1,ADCY10,PLCL1,PLCH2,ADRB2
Inflammasome pathway	2.95	1.92	0.286	NaN	CXCL8,NAIP,NOD2,IL18,NLRP1,CASP1
Antioxidant Action of Vitamin C	2.93	1.92	0.146	NaN	PLA2G4C,IKBKE,PLCL2,PLCH2,MAPK11,PLA2G2A,SLC2A3,HMOX1,PLCE1,PLA2G4D,PLA2G2F,LCAT,PLCG2,RARRES3,PLCL1
Protein Kinase A Signaling	2.92	1.92	0.1	NaN	ENPP6,PTK2B,TNNI2,DUSP6,ADCY4,MYLK,AKAP3,PLCH2,NOS3,DUSP2,TGFBR2,PLCE1,PDE7B,RHO,PTPRJ,PTPRO,NGFR,DUSP10,TGFB2,PDE11A,PLCL1,GNG12,PDE9A,MAP3K1,PTCH1,AKAP6,PLCL2,PDE4B,ITPR1,NFATC4,CREB5,TTN,PTPRM,PTPRU,PLCG2,ADCY1,CDC14B,TNNI1,ADCY10
Glioblastoma Multiforme Signaling	2.88	1.88	0.126	NaN	WNT9A,PIK3R1,PIK3C2G,WNT6,PLCL2,ITPR1,PLCH2,PIK3R3,IGF2,WNT3A,PLCE1,IRS1,PLCG2,CDKN1A,RHOU,AKT3,PLCL1,FNBP1,WNT11,FZD7
Role of NFAT in Regulation of the Immune Response	2.85	1.86	0.12	NaN	BLNK,FYN,FCGR2A,PIK3R1,PIK3C2G,IKBKE,ITPR1,NFATC4,FCGR1A,PIK3R3,RCAN1,FOS,HLA-DRB1,JUN,HLA-DMA,IRS1,PLCG2,ZAP70,HLA-DMB,AKT3,RCAN2,GNG12
Integrin Signaling	2.83	1.85	0.114	NaN	RAP2B,FYN,PARVA,ARHGAP26,PIK3R1,PIK3C2G,MYLK,TTN,PIK3R3,ITGB2,CAPN8,ITGA3,ITGAM,TSPAN1,PLCG2,IRS1,RHOU,AKT3,ZYX,CAPN2,CAPN9,NEDD9,ACTN1,FNBP1,CAPN3
IL-6 Signaling	2.82	1.85	0.134	NaN	SOCS1,CXCL8,PIK3R1,PIK3C2G,IKBKE,STAT3,MAPK11,PIK3R3,FOS,IL18,JUN,IRS1,NGFR,MAP3K7,AKT3,IL1RAP,A2M
IL-17 Signaling	2.81	1.85	0.153	NaN	CXCL8,JAK1,PIK3R1,PIK3C2G,MAPK11,PIK3R3,CXCL10,JUN,CCL2,TIMP1,IRS1,MAP3K7,AKT3
TREM1 Signaling	2.8	1.85	0.16	NaN	CXCL8,CXCL3,NOD2,IL18,CCL2,PLCG2,TLR1,CIITA,CASP1,AKT3,CD83,STAT3
cAMP-mediated signaling	2.78	1.83	0.113	NaN	ENPP6,HCAR3,RGS2,PDE9A,DUSP6,ADCY4,AKAP6,AKAP3,PDE4B,STAT3,CREB5,XCR1,GPER1,NPR3,PDE7B,ADCY1,CAMK1G,ADORA2B,ADORA1,ADCY10,PDE11A,ADORA2A,HCAR2,PKIG,ADRB2
Neurotrophin/TRK Signaling	2.75	1.82	0.158	NaN	PIK3R3,FOS,NTRK2,JUN,BDNF,PIK3R1,SPRY2,IRS1,NGFR,NTRK1,PIK3C2G,CREB5
CD28 Signaling in T Helper Cells	2.75	1.82	0.132	NaN	FYN,PIK3R1,MAP3K1,PIK3C2G,IKBKE,ITPR1,NFATC4,PIK3R3,FOS,JUN,HLA-DRB1,CARD11,HLA-DMA,IRS1,ZAP70,HLA-DMB,AKT3
Molecular Mechanisms of Cancer	2.72	1.8	0.0989	NaN	RAP2B,FYN,JAK1,ADCY4,PIK3R1,WNT6,CDKN2B,MAPK11,TGFBR2,ITGA3,JUN,RHOU,TGFB2,MAP3K7,AKT3,HIPK2,RASA1,BIRC3,CASP10,NAIP,WNT9A,PTCH1,PIK3C2G,BMP5,PIK3R3,FOS,WNT3A,RASGRP1,IRS1,ADCY1,ARHGEF6,CDKN1A,CFLAR,ADCY10,WNT11,FNBP1,FZD7
PKCθ Signaling in T Lymphocytes	2.71	1.8	0.131	NaN	FYN,PIK3R1,MAP3K1,PIK3C2G,IKBKE,NFATC4,PIK3R3,FOS,JUN,HLA-DRB1,CARD11,HLA-DMA,IRS1,PLCG2,ZAP70,HLA-DMB,MAP3K7
T Cell Receptor Signaling	2.68	1.77	0.138	NaN	FYN,PIK3R1,MAP3K1,PIK3C2G,IKBKE,NFATC4,PIK3R3,TEC,FOS,JUN,CARD11,IRS1,RASGRP1,ZAP70,RASA1
Thyroid Hormone Metabolism II (via Conjugation and/or Degradation)	2.65	1.76	0.2	NaN	UGT1A5,SULT1E1,UGT1A6,DIO1,SULT1A3/SULT1A4,UGT1A4,UGT1A7 (includes others),SULT1A2
FAK Signaling	2.65	1.76	0.141	NaN	FYN,ARHGAP26,PIK3R1,PIK3C2G,PIK3R3,CAPN8,ITGA3,IRS1,PLCG2,ARHGEF6,AKT3,CAPN2,CAPN9,CAPN3
P2Y Purigenic Receptor Signaling Pathway	2.64	1.76	0.129	NaN	ADCY4,PIK3R1,PIK3C2G,PLCL2,PLCH2,CREB5,PIK3R3,FOS,JUN,PLCE1,IRS1,PLCG2,ADCY1,AKT3,PLCL1,ADCY10,GNG12
LXR/RXR Activation	2.64	1.76	0.132	NaN	C3,CD36,SERPINF1,SAA2,ABCA1,C4A/C4B,IL18,LCAT,CCL2,NGFR,MYLIP,SERPINA1,S100A8,IL1RAP,CLU,APOD
MSP-RON Signaling Pathway	2.61	1.75	0.169	NaN	PIK3R3,ITGB2,ITGAM,CCL2,CSF1,PIK3R1,IRS1,PIK3C2G,RPS6KA2,CCR2
RANK Signaling in Osteoclasts	2.56	1.7	0.139	NaN	TNFSF11,PTK2B,PIK3R1,MAP3K1,PIK3C2G,IKBKE,MAPK11,PIK3R3,FOS,JUN,IRS1,MAP3K7,AKT3,BIRC3
Production of Nitric Oxide and Reactive Oxygen Species in Macrophages	2.55	1.7	0.114	NaN	JAK1,PIK3R1,MAP3K1,PIK3C2G,IKBKE,IFNGR1,MAPK11,PIK3R3,FOS,JUN,PPP2R3A,NGFR,IRS1,PLCG2,RHOU,MAP3K7,AKT3,SERPINA1,S100A8,FNBP1,CLU,APOD
Growth Hormone Signaling	2.51	1.67	0.148	NaN	PIK3R3,SOCS1,FOS,IGF2,RPS6KA6,PLCG2,PIK3R1,IRS1,PIK3C2G,RPS6KA2,STAT3,A2M
Chemokine Signaling	2.5	1.66	0.155	NaN	CCR3,FOS,CCR5,JUN,CCL2,PTK2B,PLCG2,PIK3C2G,CAMK1G,CCL24,MAPK11
Neuropathic Pain Signaling In Dorsal Horn Neurons	2.48	1.65	0.132	NaN	KCNN3,BDNF,PIK3R1,PIK3C2G,ITPR1,PLCL2,PLCH2,PIK3R3,FOS,PLCE1,NTRK2,IRS1,PLCG2,CAMK1G,PLCL1
Colorectal Cancer Metastasis Signaling	2.43	1.61	0.105	NaN	JAK1,MMP16,PIK3R1,ADCY4,WNT6,MMP24,TGFBR2,JUN,TLR1,TGFB2,RHOU,AKT3,GNG12,WNT9A,PIK3C2G,IFNGR1,STAT3,PIK3R3,FOS,WNT3A,IRS1,ADCY1,ADCY10,WNT11,FNBP1,FZD7
JAK/Stat Signaling	2.42	1.61	0.145	NaN	PIK3R3,STAT4,SOCS1,FOS,JAK1,JUN,PIK3R1,IRS1,CDKN1A,PIK3C2G,AKT3,STAT3
Relaxin Signaling	2.42	1.61	0.12	NaN	ENPP6,PDE9A,ADCY4,PIK3R1,PIK3C2G,PDE4B,NOS3,PIK3R3,FOS,JUN,PDE7B,IRS1,ADCY1,GUCY1A2,AKT3,ADCY10,PDE11A,GNG12
Cardiac Hypertrophy Signaling	2.42	1.61	0.106	NaN	CACNA1S,PIK3R1,ADCY4,PLCH2,MAPK11,TGFBR2,PLCE1,JUN,RHOU,MAP3K7,TGFB2,PLCL1,GNG12,ADRB2,MAP3K1,PIK3C2G,CACNA1C,NFATC4,PLCL2,PIK3R3,IRS1,PLCG2,ADCY1,ADCY10,FNBP1
IL-17A Signaling in Fibroblasts	2.38	1.59	0.2	NaN	FOS,JUN,CCL2,LCN2,MAP3K7,IKBKE,MAPK11
Dopamine Degradation	2.38	1.59	0.2	NaN	MAOB,SULT1E1,ALDH1A3,SMOX,SULT1A3/SULT1A4,MAOA,SULT1A2
NGF Signaling	2.38	1.59	0.128	NaN	PIK3R1,MAP3K1,PIK3C2G,IKBKE,SMPD1,CREB5,PIK3R3,RPS6KA6,IRS1,PLCG2,NGFR,NTRK1,MAP3K7,AKT3,RPS6KA2
p38 MAPK Signaling	2.38	1.59	0.128	NaN	PLA2G4C,CREB5,MAPK11,PLA2G2A,TGFBR2,RPS6KA6,IL18,PLA2G4D,PLA2G2F,MAPT,DUSP10,MAP3K7,TGFB2,RPS6KA2,IL1RAP
Melanocyte Development and Pigmentation Signaling	2.37	1.59	0.137	NaN	TYRP1,PIK3R3,RPS6KA6,PLCG2,PIK3R1,IRS1,ADCY4,ADCY1,PIK3C2G,KIT,RPS6KA2,CREB5,ADCY10
Nicotine Degradation III	2.35	1.58	0.167	NaN	CYP3A7,UGT1A5,CYP4F8,UGT1A6,CYP4X1,CYP2J2,AOX1,UGT1A4,UGT1A7 (includes others)
IL-2 Signaling	2.35	1.58	0.156	NaN	PIK3R3,SOCS1,FOS,JAK1,JUN,PTK2B,PIK3R1,IRS1,PIK3C2G,AKT3
Regulation of the Epithelial-Mesenchymal Transition Pathway	2.33	1.57	0.111	NaN	ETS1,JAK1,WNT9A,EGR1,PIK3R1,PIK3C2G,WNT6,STAT3,FGF1,MET,TGFBR2,PIK3R3,WNT3A,IRS1,FGF12,TGFB2,AKT3,JAG1,FGF7,WNT11,FZD7
PPARα/RXRα Activation	2.3	1.54	0.112	NaN	GPD1,CD36,ADCY4,TGFBR3,IKBKE,PLCL2,PLCH2,ABCA1,TGFBR2,JUN,PLCE1,IRS1,PLCG2,ADCY1,MAP3K7,TGFB2,PLCL1,ADCY10,IL1RAP,PPARGC1A
Human Embryonic Stem Cell Pluripotency	2.28	1.53	0.119	NaN	BDNF,WNT9A,PIK3R1,PIK3C2G,WNT6,BMP5,PIK3R3,TGFBR2,WNT3A,NTRK2,IRS1,NTRK1,TGFB2,SPHK1,AKT3,WNT11,FZD7
iCOS-iCOSL Signaling in T Helper Cells	2.27	1.53	0.125	NaN	PIK3R1,PIK3C2G,TRAT1,IKBKE,NFATC4,PLEKHA4,ITPR1,PIK3R3,HLA-DRB1,HLA-DMA,IRS1,ZAP70,HLA-DMB,AKT3,PLEKHA2
NRF2-mediated Oxidative Stress Response	2.23	1.49	0.109	NaN	PIK3R1,MAP3K1,DNAJC6,PIK3C2G,HSPB8,HERPUD1,GCLC,DNAJC15,SOD3,PIK3R3,FOS,HMOX1,JUN,IRS1,CYP4Z1,MAP3K7,FMO1,AOX1,UBE2E3,ENC1,GSTK1
IL-17A Signaling in Airway Cells	2.23	1.49	0.143	NaN	PIK3R3,CXCL3,JAK1,PIK3R1,IRS1,PIK3C2G,MAP3K7,AKT3,IKBKE,STAT3,MAPK11
Type I Diabetes Mellitus Signaling	2.23	1.49	0.127	NaN	SOCS1,JAK1,HLA-A,IKBKE,IFNGR1,MAPK11,HLA-DRB1,HLA-DMA,NGFR,HLA-DMB,MAP3K7,HLA-F,IL1RAP,HLA-E
IL-12 Signaling and Production in Macrophages	2.19	1.46	0.116	NaN	PIK3R1,PIK3C2G,IKBKE,IFNGR1,MAPK11,STAT4,PIK3R3,FOS,IL18,JUN,IRS1,TGFB2,AKT3,SERPINA1,S100A8,CLU,APOD
TNFR2 Signaling	2.18	1.46	0.207	NaN	NAIP,FOS,JUN,MAP3K1,IKBKE,BIRC3
Cardiac β-adrenergic Signaling	2.16	1.45	0.119	NaN	ENPP6,CACNA1S,PDE9A,ADCY4,CACNA1C,AKAP6,AKAP3,PDE4B,PDE7B,PPP2R3A,ADCY1,SLC8A1,ADCY10,PDE11A,GNG12,PKIG
Regulation of IL-2 Expression in Activated and Anergic T Lymphocytes	2.14	1.43	0.139	NaN	TGFBR2,FYN,FOS,JUN,CARD11,PLCG2,ZAP70,MAP3K1,TGFB2,IKBKE,NFATC4
PDGF Signaling	2.14	1.43	0.133	NaN	PIK3R3,FOS,JAK1,JUN,PLCG2,PIK3R1,IRS1,MAP3K1,PIK3C2G,SPHK1,STAT3,RASA1
Gαq Signaling	2.13	1.43	0.112	NaN	RGS2,PTK2B,PIK3R1,PIK3C2G,RGS16,IKBKE,ITPR1,NFATC4,PIK3R3,HRH1,HMOX1,IRS1,PLCG2,RHOU,CALCR,AKT3,FNBP1,GNG12
Glucocorticoid Receptor Signaling	2.12	1.43	0.0976	NaN	JAK1,PIK3R1,SLPI,FCGR1A,MAPK11,TGFBR2,CXCL3,JUN,CCL2,ANXA1,MAP3K7,TGFB2,AKT3,SERPINE1,ADRB2,CXCL8,VCAM1,MAP3K1,PIK3C2G,IKBKE,STAT3,NFATC4,PIK3R3,FOS,IRS1,CDKN1A,PLAU,A2M
B Cell Receptor Signaling	2.12	1.43	0.108	NaN	ETS1,BLNK,RAP2B,PTK2B,FCGR2A,EGR1,PIK3R1,MAP3K1,PIK3C2G,IKBKE,NFATC4,CREB5,MAPK11,PIK3R3,JUN,DAPP1,IRS1,PLCG2,MAP3K7,AKT3
Inhibition of Matrix Metalloproteases	2.11	1.43	0.179	NaN	ADAM12,TIMP1,SDC2,MMP16,THBS2,A2M,MMP24
Superpathway of Inositol Phosphate Compounds	2.09	1.41	0.103	NaN	FYN,PIK3R1,PIK3C2G,TRAT1,ACP5,PLCH2,PTPRM,DUSP2,PIK3R3,CA3,IPMK,PLCE1,PTPRJ,PTPRO,PPP2R3A,PLCG2,DUSP10,IRS1,KIT,NUDT4,RASA1,ALPL,PIP4K2A
Phospholipase C Signaling	2.08	1.41	0.101	NaN	BLNK,HDAC9,FYN,FCGR2A,ADCY4,PLA2G4C,ITPR1,NFATC4,CREB5,PLA2G2A,HDAC5,HMOX1,ITGA3,PLA2G4D,PLCE1,PLA2G2F,PLCG2,ZAP70,ARHGEF6,ADCY1,RHOU,ADCY10,FNBP1,GNG12
ERK/MAPK Signaling	2.08	1.41	0.106	NaN	ETS1,FYN,PTK2B,DUSP6,PIK3R1,PLA2G4C,PIK3C2G,STAT3,CREB5,PLA2G2A,DUSP2,PIK3R3,FOS,ITGA3,PLA2G4D,ELF3,PLA2G2F,PPP2R3A,ETS2,IRS1,PLCG2
Renal Cell Carcinoma Signaling	2.06	1.39	0.136	NaN	ETS1,MET,UBD,PIK3R3,FOS,JUN,PIK3R1,IRS1,PIK3C2G,EGLN3,AKT3
Ceramide Signaling	2.03	1.36	0.129	NaN	PIK3R3,FOS,JUN,PPP2R3A,PIK3R1,IRS1,NGFR,MAP3K1,PIK3C2G,SPHK1,AKT3,SMPD1
MIF Regulation of Innate Immunity	1.99	1.34	0.171	NaN	FOS,PLA2G4D,JUN,PLA2G2F,PLA2G4C,CD74,PLA2G2A
Thrombin Signaling	1.99	1.34	0.103	NaN	ADCY4,PIK3R1,PIK3C2G,MYLK,PLCL2,ITPR1,PLCH2,MAPK11,PIK3R3,PLCE1,IRS1,PLCG2,ADCY1,ARHGEF6,RHOU,CAMK1G,AKT3,PLCL1,ADCY10,FNBP1,GNG12
Role of MAPK Signaling in the Pathogenesis of Influenza	1.99	1.34	0.139	NaN	CXCL10,PLA2G4D,PLA2G2F,LCAT,CCL2,PLA2G4C,RARRES3,AKT3,MAPK11,PLA2G2A
Putrescine Degradation III	1.98	1.34	0.217	NaN	MAOB,ALDH1A3,SMOX,SAT1,MAOA
Mouse Embryonic Stem Cell Pluripotency	1.97	1.33	0.123	NaN	JAK1,PIK3R1,PIK3C2G,STAT3,ID3,MAPK11,PIK3R3,LIFR,WNT3A,IRS1,MAP3K7,AKT3,FZD7
Aldosterone Signaling in Epithelial Cells	1.97	1.33	0.108	NaN	CRYAB,PIK3R1,DNAJC6,PIK3C2G,HSPB8,PLCL2,ITPR1,DNAJC15,PLCH2,HSPA12A,PIK3R3,SCNN1A,SCNN1G,PLCE1,IRS1,PLCG2,PLCL1,PIP4K2A
NF-κB Signaling	1.93	1.3	0.106	NaN	TNFSF11,TGFBR3,PIK3R1,MAP3K1,PIK3C2G,TAB3,TGFBR2,PIK3R3,IL18,NTRK2,CARD11,NGFR,IRS1,PLCG2,ZAP70,NTRK1,TLR1,MAP3K7,AKT3
CNTF Signaling	1.91	1.29	0.143	NaN	LIFR,PIK3R3,RPS6KA6,JAK1,PIK3R1,IRS1,PIK3C2G,RPS6KA2,STAT3
PCP pathway	1.91	1.29	0.143	NaN	WNT3A,JUN,SDC2,WNT9A,WNT6,SDC3,PRICKLE1,WNT11,FZD7
FLT3 Signaling in Hematopoietic Progenitor Cells	1.91	1.29	0.129	NaN	PIK3R3,STAT4,RPS6KA6,PIK3R1,IRS1,PIK3C2G,AKT3,RPS6KA2,STAT3,CREB5,MAPK11
IL-22 Signaling	1.9	1.29	0.208	NaN	JAK1,IL22RA2,AKT3,STAT3,MAPK11
Serotonin Receptor Signaling	1.88	1.27	0.163	NaN	MAOB,SMOX,DDC,ADCY4,ADCY1,ADCY10,MAOA
Pathogenesis of Multiple Sclerosis	1.86	1.25	0.333	NaN	CCR1,CXCL10,CCR5
Synaptic Long Term Depression	1.85	1.25	0.11	NaN	PLA2G4C,PLCL2,ITPR1,NOS3,PLCH2,PLA2G2A,PRKG1,PLCE1,PLA2G4D,PLA2G2F,LCAT,PPP2R3A,PLCG2,GUCY1A2,RARRES3,PLCL1
Role of NANOG in Mammalian Embryonic Stem Cell Pluripotency	1.84	1.25	0.115	NaN	JAK1,WNT9A,PIK3R1,PIK3C2G,WNT6,STAT3,BMP5,PIK3R3,LIFR,WNT3A,IRS1,AKT3,WNT11,FZD7
3-phosphoinositide Biosynthesis	1.84	1.25	0.103	NaN	FYN,PIK3R1,PIK3C2G,TRAT1,ACP5,PTPRM,DUSP2,PIK3R3,CA3,PTPRJ,PTPRO,PPP2R3A,DUSP10,IRS1,KIT,NUDT4,RASA1,PIP4K2A,ALPL
IL-4 Signaling	1.84	1.25	0.126	NaN	PIK3R3,SOCS1,JAK1,HLA-DRB1,HLA-DMA,PIK3R1,IRS1,HLA-DMB,PIK3C2G,AKT3,NFATC4
IL-17A Signaling in Gastric Cells	1.83	1.25	0.2	NaN	CXCL10,CXCL8,FOS,JUN,MAPK11
Tryptophan Degradation X (Mammalian, via Tryptamine)	1.83	1.25	0.2	NaN	MAOB,ALDH1A3,SMOX,DDC,MAOA
IL-15 Signaling	1.83	1.25	0.132	NaN	PIK3R3,CXCL8,VCAM1,JAK1,PIK3R1,IRS1,PIK3C2G,AKT3,STAT3,MAPK11
GDNF Family Ligand-Receptor Interactions	1.83	1.25	0.132	NaN	PIK3R3,FOS,JUN,PLCG2,PIK3R1,IRS1,PIK3C2G,GFRA2,ITPR1,RASA1
CTLA4 Signaling in Cytotoxic T Lymphocytes	1.82	1.25	0.121	NaN	B2M,PIK3R3,FYN,PPP2R3A,HLA-A,PIK3R1,IRS1,ZAP70,CLTCL1,PIK3C2G,TRAT1,AKT3
CDK5 Signaling	1.82	1.25	0.121	NaN	ITGA3,NTRK2,BDNF,PPP2R3A,EGR1,MAPT,NGFR,ADCY4,ADCY1,LAMB1,ADCY10,MAPK11
p53 Signaling	1.82	1.25	0.117	NaN	PIK3R3,HDAC9,TP53INP1,TP63,JUN,GADD45A,PIK3R1,IRS1,CDKN1A,PIK3C2G,AKT3,SERPINB5,HIPK2
Corticotropin Releasing Hormone Signaling	1.82	1.25	0.117	NaN	FOS,JUN,BDNF,PLCG2,ADCY4,ADCY1,PTCH1,GUCY1A2,ITPR1,NOS3,CREB5,ADCY10,MAPK11
Estrogen-Dependent Breast Cancer Signaling	1.79	1.23	0.13	NaN	PIK3R3,FOS,JUN,PIK3R1,IRS1,PIK3C2G,HSD17B11,AKT3,CREB5,HSD17B2
Role of Pattern Recognition Receptors in Recognition of Bacteria and Viruses	1.77	1.2	0.109	NaN	CXCL8,OAS1,C3,OAS2,PIK3R1,PIK3C2G,PIK3R3,IL18,NOD2,PLCG2,IRS1,TLR1,DDX58,CASP1,TGFB2
CD40 Signaling	1.75	1.2	0.128	NaN	PIK3R3,FOS,JUN,PIK3R1,IRS1,PIK3C2G,MAP3K7,IKBKE,STAT3,MAPK11
Dermatan Sulfate Biosynthesis (Late Stages)	1.73	1.18	0.152	NaN	HS6ST1,SULT1E1,SULT1A3/SULT1A4,CHST3,HS6ST2,SULT1A2,DSE
Wnt/Ca+ pathway	1.71	1.16	0.14	NaN	PLCE1,PLCG2,PLCL2,NFATC4,PLCL1,PLCH2,CREB5,FZD7
IL-1 Signaling	1.7	1.16	0.121	NaN	FOS,JUN,ADCY4,MAP3K1,ADCY1,MAP3K7,IKBKE,ADCY10,MAPK11,IL1RAP,GNG12
Spermine and Spermidine Degradation I	1.7	1.16	0.5	NaN	SMOX,SAT1
Glycerol-3-phosphate Shuttle	1.7	1.16	0.5	NaN	GPD1,GPD1L
HIF1α Signaling	1.7	1.16	0.113	NaN	MMP16,PIK3R1,PIK3C2G,NOS3,MAPK11,SLC2A3,MMP24,PIK3R3,JUN,EDN1,IRS1,AKT3,EGLN3
Reelin Signaling in Neurons	1.67	1.14	0.12	NaN	PIK3R3,APBB1,ITGB2,FYN,ITGA3,PIK3R1,MAPT,IRS1,ARHGEF6,PIK3C2G,FRK
Complement System	1.67	1.14	0.162	NaN	C1R,C4A/C4B,ITGB2,CD59,C3,ITGAM
Graft-versus-Host Disease Signaling	1.63	1.11	0.146	NaN	IL18,HLA-DRB1,HLA-DMA,HLA-A,HLA-DMB,HLA-F,HLA-E
Glioma Invasiveness Signaling	1.63	1.11	0.129	NaN	PIK3R3,TIMP1,PIK3R1,IRS1,PIK3C2G,RHOU,CD44,PLAU,FNBP1
CCR3 Signaling in Eosinophils	1.63	1.11	0.108	NaN	CCR3,PIK3R1,PLA2G4C,PIK3C2G,CCL24,MYLK,ITPR1,MAPK11,PLA2G2A,PIK3R3,PLA2G4D,PLA2G2F,IRS1,GNG12
Gap Junction Signaling	1.62	1.11	0.101	NaN	DBN1,ADCY4,PIK3R1,PIK3C2G,PLCL2,ITPR1,PLCH2,PIK3R3,PRKG1,PLCE1,IRS1,PLCG2,ADCY1,GUCY1A2,AKT3,PLCL1,ADCY10
April Mediated Signaling	1.62	1.1	0.158	NaN	FOS,JUN,MAP3K1,IKBKE,NFATC4,MAPK11
Pancreatic Adenocarcinoma Signaling	1.62	1.1	0.11	NaN	JAK1,PIK3R1,PIK3C2G,HBEGF,STAT3,CDKN2B,PIK3R3,TGFBR2,HMOX1,IRS1,CDKN1A,TGFB2,AKT3
IGF-1 Signaling	1.61	1.1	0.113	NaN	PIK3R3,SOCS1,FOS,JAK1,JUN,PIK3R1,IRS1,PIK3C2G,AKT3,STAT3,RASA1,GRB10
T Helper Cell Differentiation	1.6	1.1	0.127	NaN	STAT4,TGFBR2,IL18,HLA-DRB1,HLA-DMA,NGFR,HLA-DMB,IFNGR1,STAT3
Role of JAK1 and JAK3 in γc Cytokine Signaling	1.6	1.1	0.127	NaN	BLNK,PIK3R3,SOCS1,JAK1,PTK2B,PIK3R1,IRS1,PIK3C2G,STAT3
PTEN Signaling	1.59	1.09	0.109	NaN	TGFBR2,PIK3R3,ITGA3,NTRK2,NGFR,PIK3R1,TGFBR3,NTRK1,CDKN1A,PREX2,AKT3,IKBKE,MAGI3
Dermatan Sulfate Biosynthesis	1.59	1.09	0.133	NaN	HS6ST1,SULT1E1,XYLT1,SULT1A3/SULT1A4,CHST3,HS6ST2,SULT1A2,DSE
Prolactin Signaling	1.58	1.09	0.12	NaN	PIK3R3,SOCS1,FYN,FOS,JUN,PLCG2,PIK3R1,IRS1,PIK3C2G,STAT3
Tec Kinase Signaling	1.58	1.09	0.1	NaN	FYN,JAK1,PTK2B,PIK3R1,PIK3C2G,STAT3,FRK,TEC,STAT4,PIK3R3,FOS,ITGA3,IRS1,PLCG2,RHOU,FNBP1,GNG12
Leukocyte Extravasation Signaling	1.57	1.08	0.0952	NaN	VCAM1,PTK2B,MMP16,PIK3R1,PIK3C2G,MAPK11,MMP24,TEC,PIK3R3,ITGB2,ITGA3,ITGAM,TIMP1,IRS1,RASGRP1,PLCG2,CD44,PECAM1,ACTN1,MSN
Estrogen Biosynthesis	1.57	1.08	0.154	NaN	CYP3A7,CYP4F8,HSD17B11,CYP4X1,CYP2J2,HSD17B2
PEDF Signaling	1.55	1.07	0.119	NaN	PIK3R3,BDNF,PIK3R1,IRS1,PIK3C2G,SERPINF1,AKT3,IKBKE,CFLAR,MAPK11
STAT3 Pathway	1.53	1.05	0.123	NaN	TGFBR2,SOCS1,NTRK2,TGFBR3,NGFR,NTRK1,CDKN1A,STAT3,MAPK11
Gαs Signaling	1.53	1.05	0.11	NaN	HCAR3,RGS2,GPER1,ADCY4,ADCY1,ADORA2B,ADCY10,CREB5,HCAR2,ADORA2A,GNG12,ADRB2
GPCR-Mediated Nutrient Sensing in Enteroendocrine Cells	1.52	1.05	0.118	NaN	PLCE1,PLCG2,ADCY4,ADCY1,PLCL2,ITPR1,ADCY10,PLCL1,PLCH2,GNG12
D-myo-inositol-5-phosphate Metabolism	1.52	1.05	0.102	NaN	ACP5,PLCH2,PTPRM,DUSP2,CA3,PLCE1,PTPRJ,PTPRO,PPP2R3A,DUSP10,PLCG2,NUDT4,RASA1,PIP4K2A,ALPL
B Cell Activating Factor Signaling	1.52	1.05	0.15	NaN	FOS,JUN,MAP3K1,IKBKE,NFATC4,MAPK11
Noradrenaline and Adrenaline Degradation	1.52	1.05	0.15	NaN	MAOB,DHRS2,ALDH1A3,SMOX,ADHFE1,MAOA
Amyloid Processing	1.51	1.04	0.137	NaN	CAPN8,MAPT,AKT3,CAPN2,CAPN9,MAPK11,CAPN3
TR/RXR Activation	1.49	1.03	0.112	NaN	PIK3R3,KLF9,PIK3R1,DIO1,IRS1,PIK3C2G,SLC16A2,AKT3,RCAN2,THRSP,PPARGC1A
NF-κB Activation by Viruses	1.49	1.03	0.116	NaN	PIK3R3,ITGB2,ITGA3,CCR5,PIK3R1,IRS1,MAP3K1,PIK3C2G,AKT3,IKBKE
Dopamine-DARPP32 Feedback in cAMP Signaling	1.47	1.02	0.0988	NaN	CACNA1S,ADCY4,CACNA1C,KCNJ3,PLCL2,ITPR1,CREB5,PLCH2,PRKG1,PLCE1,PPP2R3A,PLCG2,ADCY1,GUCY1A2,PLCL1,ADCY10
Telomerase Signaling	1.47	1.02	0.108	NaN	ETS1,PIK3R3,HDAC9,ELF3,ETS2,PPP2R3A,PIK3R1,IRS1,CDKN1A,PIK3C2G,AKT3,HDAC5
Semaphorin Signaling in Neurons	1.42	0.979	0.132	NaN	MET,FYN,RND1,RHOU,PLXNB1,FNBP1,NRP1
Paxillin Signaling	1.42	0.979	0.106	NaN	PIK3R3,ITGB2,PARVA,ITGA3,ITGAM,PTK2B,PIK3R1,IRS1,ARHGEF6,PIK3C2G,MAPK11,ACTN1
Nitric Oxide Signaling in the Cardiovascular System	1.42	0.979	0.106	NaN	BDKRB2,PIK3R3,CACNA1S,PRKG1,PIK3R1,IRS1,PIK3C2G,GUCY1A2,CACNA1C,AKT3,ITPR1,NOS3
Calcium Signaling	1.42	0.975	0.0955	NaN	RAP2B,HDAC9,TP63,TNNI2,TNNT2,ITPR1,NFATC4,CREB5,HDAC5,RCAN1,TRPV6,CASQ1,CAMK1G,TNNI1,SLC8A1,RCAN2,ATP2B4
Thrombopoietin Signaling	1.4	0.971	0.123	NaN	PIK3R3,FOS,JUN,PLCG2,PIK3R1,IRS1,PIK3C2G,STAT3
Communication between Innate and Adaptive Immune Cells	1.4	0.971	0.112	NaN	B2M,CXCL10,CXCL8,IL18,HLA-DRB1,HLA-A,TLR1,CD83,HLA-F,HLA-E
Crosstalk between Dendritic Cells and Natural Killer Cells	1.4	0.971	0.112	NaN	IL18,HLA-DRB1,HLA-A,FSCN1,CD69,NCR3,LTB,CD83,HLA-F,HLA-E
Apoptosis Signaling	1.4	0.971	0.112	NaN	GAS2,CAPN8,NAIP,PLCG2,CAPN2,IKBKE,CAPN9,BIRC3,CASP10,CAPN3
Dopamine Receptor Signaling	1.4	0.971	0.117	NaN	MAOB,PPP2R3A,SMOX,DDC,ADCY4,ADCY1,ADCY10,MAOA,SLC6A3
Type II Diabetes Mellitus Signaling	1.39	0.965	0.102	NaN	SOCS1,PIK3R1,CD36,MAP3K1,PIK3C2G,IKBKE,SMPD1,PIK3R3,IRS1,NGFR,MAP3K7,AKT3,ACSL4
Virus Entry via Endocytic Pathways	1.38	0.961	0.108	NaN	B2M,PIK3R3,ITGB2,FYN,ITGA3,HLA-A,PLCG2,PIK3R1,IRS1,CLTCL1,PIK3C2G
Role of Hypercytokinemia/hyperchemokinemia in the Pathogenesis of Influenza	1.38	0.961	0.14	NaN	CCR1,CXCL10,CXCL8,IL18,CCR5,CCL2
MIF-mediated Glucocorticoid Regulation	1.35	0.94	0.152	NaN	PLA2G4D,PLA2G2F,PLA2G4C,CD74,PLA2G2A
eNOS Signaling	1.35	0.94	0.0968	NaN	ADCY4,PIK3R1,PIK3C2G,ITPR1,NOS3,PIK3R3,BDKRB2,LPAR6,PRKG1,IRS1,PLCG2,ADCY1,GUCY1A2,AKT3,ADCY10
Ceramide Biosynthesis	1.34	0.94	0.333	NaN	SPTLC2,SPTLC3
Role of IL-17F in Allergic Inflammatory Airway Diseases	1.34	0.94	0.136	NaN	CXCL10,CXCL8,RPS6KA6,CCL2,RPS6KA2,CREB5
iNOS Signaling	1.34	0.94	0.136	NaN	FOS,JAK1,JUN,IKBKE,IFNGR1,MAPK11
Lymphotoxin β Receptor Signaling	1.34	0.94	0.119	NaN	PIK3R3,VCAM1,PIK3R1,IRS1,PIK3C2G,LTB,AKT3,IKBKE
Role of IL-17A in Arthritis	1.34	0.94	0.119	NaN	PIK3R3,CXCL8,CXCL3,CCL2,PIK3R1,IRS1,PIK3C2G,MAPK11
Eicosanoid Signaling	1.34	0.94	0.119	NaN	PLA2G4D,PLA2G2F,LCAT,PLA2G4C,RARRES3,CYSLTR1,GGT1,PLA2G2A
Erythropoietin Signaling	1.34	0.94	0.114	NaN	PIK3R3,SOCS1,FOS,JUN,PLCG2,PIK3R1,IRS1,PIK3C2G,AKT3
Wnt/β-catenin Signaling	1.33	0.938	0.0947	NaN	GJA1,WNT9A,TGFBR3,WNT6,UBD,TGFBR2,WNT3A,JUN,PPP2R3A,MAP3K7,TGFB2,CD44,AKT3,DKK1,WNT11,FZD7
Chronic Myeloid Leukemia Signaling	1.33	0.938	0.106	NaN	PIK3R3,TGFBR2,HDAC9,PIK3R1,IRS1,CDKN1A,PIK3C2G,TGFB2,AKT3,IKBKE,HDAC5
Ubiquinol-10 Biosynthesis (Eukaryotic)	1.32	0.937	0.214	NaN	MICAL1,CYP7B1,ECHDC1
Phenylalanine Degradation IV (Mammalian, via Side Chain)	1.32	0.937	0.214	NaN	MAOB,SMOX,MAOA
14-3-3-mediated Signaling	1.32	0.937	0.1	NaN	PIK3R3,FOS,PLCE1,JUN,MAPT,PLCG2,PIK3R1,IRS1,PIK3C2G,AKT3,PLCL2,PLCL1,PLCH2
Gα12/13 Signaling	1.32	0.937	0.1	NaN	TEC,PIK3R3,LPAR6,JUN,PTK2B,CDH18,PIK3R1,IRS1,MAP3K1,PIK3C2G,AKT3,IKBKE,RASA1
IL-8 Signaling	1.31	0.929	0.0914	NaN	CXCL8,VCAM1,PTK2B,PIK3R1,PIK3C2G,HBEGF,IKBKE,PIK3R3,ITGB2,HMOX1,FOS,JUN,ITGAM,IRS1,RHOU,AKT3,FNBP1,GNG12
CREB Signaling in Neurons	1.3	0.923	0.0924	NaN	ADCY4,PIK3R1,PIK3C2G,PLCL2,ITPR1,CREB5,PLCH2,PIK3R3,PLCE1,GRIK4,IRS1,PLCG2,ADCY1,AKT3,PLCL1,ADCY10,GNG12
p70S6K Signaling	1.3	0.923	0.0992	NaN	PIK3R3,PLCE1,JAK1,PPP2R3A,MAPT,PLCG2,PIK3R1,IRS1,PIK3C2G,AKT3,PLCL2,PLCL1,PLCH2
IL-9 Signaling	1.3	0.923	0.133	NaN	PIK3R3,JAK1,PIK3R1,IRS1,PIK3C2G,STAT3
Role of JAK1, JAK2 and TYK2 in Interferon Signaling	1.28	0.91	0.167	NaN	SOCS1,JAK1,IFNGR1,STAT3
Fc Epsilon RI Signaling	1.28	0.907	0.101	NaN	PIK3R3,FYN,PLA2G4D,PLA2G2F,PLCG2,PIK3R1,IRS1,PLA2G4C,PIK3C2G,AKT3,MAPK11,PLA2G2A
Chondroitin Sulfate Biosynthesis	1.24	0.876	0.121	NaN	HS6ST1,SULT1E1,XYLT1,SULT1A3/SULT1A4,CHST3,HS6ST2,SULT1A2
Role of JAK family kinases in IL-6-type Cytokine Signaling	1.23	0.864	0.16	NaN	SOCS1,JAK1,STAT3,MAPK11
Bupropion Degradation	1.23	0.864	0.16	NaN	CYP3A7,CYP4F8,CYP4X1,CYP2J2
IL-3 Signaling	1.22	0.864	0.108	NaN	PIK3R3,FOS,JAK1,JUN,PIK3R1,IRS1,PIK3C2G,AKT3,STAT3
Methylthiopropionate Biosynthesis	1.22	0.864	1	NaN	ADI1
Autoimmune Thyroid Disease Signaling	1.22	0.864	0.128	NaN	HLA-DRB1,HLA-DMA,HLA-A,HLA-DMB,HLA-F,HLA-E
Agranulocyte Adhesion and Diapedesis	1.21	0.862	0.0899	NaN	CXCL8,SELL,VCAM1,MMP16,CCL24,MMP24,CXCL10,CXCL3,HRH1,ITGB2,ITGA3,IL18,CCL2,CCL28,PECAM1,PODXL,MSN
NAD Salvage Pathway III	1.21	0.862	0.286	NaN	NMRK1,NMNAT2
Pregnenolone Biosynthesis	1.21	0.862	0.286	NaN	MICAL1,CYP7B1
Gustation Pathway	1.21	0.862	0.0984	NaN	SCNN1A,ENPP6,LPAR6,SCNN1G,PDE7B,PDE9A,ADCY4,ADCY1,PDE4B,ITPR1,ADCY10,PDE11A
Ephrin A Signaling	1.18	0.833	0.117	NaN	EPHA7,PIK3R3,FYN,PIK3R1,IRS1,NGFR,PIK3C2G
tRNA Splicing	1.17	0.825	0.135	NaN	ENPP6,PDE7B,PDE9A,PDE4B,PDE11A
Sertoli Cell-Sertoli Cell Junction Signaling	1.17	0.825	0.0899	NaN	SPTBN2,TGFBR3,MAP3K1,NOS3,MAPK11,PLS1,ITGA3,JUN,PRKG1,SPTB,MAP3K7,GUCY1A2,AKT3,ADCY10,A2M,ACTN1
ErbB Signaling	1.17	0.825	0.102	NaN	PIK3R3,FOS,JUN,PLCG2,PIK3R1,IRS1,PIK3C2G,HBEGF,MAPK11,AREG
CXCR4 Signaling	1.16	0.817	0.0909	NaN	ADCY4,EGR1,PIK3R1,PIK3C2G,ITPR1,PIK3R3,FOS,JUN,IRS1,ADCY1,RHOU,AKT3,ADCY10,FNBP1,GNG12
TNFR1 Signaling	1.15	0.815	0.122	NaN	NAIP,FOS,JUN,MAP3K1,IKBKE,BIRC3
Chondroitin Sulfate Biosynthesis (Late Stages)	1.15	0.815	0.122	NaN	HS6ST1,SULT1E1,SULT1A3/SULT1A4,CHST3,HS6ST2,SULT1A2
LPS-stimulated MAPK Signaling	1.15	0.814	0.105	NaN	PIK3R3,FOS,JUN,PIK3R1,IRS1,PIK3C2G,MAP3K7,IKBKE,MAPK11
Toll-like Receptor Signaling	1.13	0.804	0.108	NaN	UBD,FOS,IL18,JUN,MAP3K1,TLR1,MAP3K7,MAPK11
FXR/RXR Activation	1.13	0.804	0.0952	NaN	C4A/C4B,IL18,C3,LCAT,SERPINF1,AKT3,ABCB11,SERPINA1,SAA2,CLU,APOD,PPARGC1A
IL-15 Production	1.13	0.804	0.148	NaN	JAK1,PTK2B,FRK,PTK7
D-myo-inositol (1,4,5)-Trisphosphate Biosynthesis	1.13	0.804	0.148	NaN	PLCE1,PLCG2,PLCH2,PIP4K2A
Acetone Degradation I (to Methylglyoxal)	1.13	0.804	0.148	NaN	CYP3A7,CYP4F8,CYP4X1,CYP2J2
TGF-β Signaling	1.12	0.802	0.103	NaN	TGFBR2,FOS,INHA,JUN,TGFB2,MAP3K7,HOXC9,SERPINE1,MAPK11
Cdc42 Signaling	1.12	0.802	0.0898	NaN	B2M,HLA-A,MYLK,MAPK11,FOS,ITGA3,JUN,HLA-DRB1,HLA-DMA,HLA-DMB,ARHGEF6,HLA-DQA2,HLA-F,RASA1,HLA-E
Adenosine Nucleotides Degradation II	1.11	0.794	0.176	NaN	ADA2,XDH,AOX1
Airway Pathology in Chronic Obstructive Pulmonary Disease	1.1	0.791	0.25	NaN	CXCL8,CXCL3
Superoxide Radicals Degradation	1.1	0.791	0.25	NaN	TYRP1,SOD3
Clathrin-mediated Endocytosis Signaling	1.08	0.772	0.0863	NaN	PIK3R1,PIK3C2G,DNM3,FGF1,MET,PIK3R3,UBD,ITGB2,IRS1,CLTCL1,FGF12,DAB2,S100A8,SERPINA1,FGF7,CLU,APOD
OX40 Signaling Pathway	1.07	0.765	0.101	NaN	B2M,HLA-DRB1,JUN,HLA-DMA,HLA-A,HLA-DMB,HLA-F,HLA-DQA2,HLA-E
GNRH Signaling	1.07	0.765	0.093	NaN	FOS,JUN,EGR1,ADCY4,MAP3K1,ADCY1,MAP3K7,DNM3,ITPR1,ADCY10,CREB5,MAPK11
D-myo-inositol (1,4,5,6)-Tetrakisphosphate Biosynthesis	1.07	0.765	0.093	NaN	CA3,IPMK,PTPRJ,PPP2R3A,PTPRO,DUSP10,ACP5,NUDT4,RASA1,PTPRM,ALPL,DUSP2
D-myo-inositol (3,4,5,6)-tetrakisphosphate Biosynthesis	1.07	0.765	0.093	NaN	CA3,IPMK,PTPRJ,PPP2R3A,PTPRO,DUSP10,ACP5,NUDT4,RASA1,PTPRM,ALPL,DUSP2
Angiopoietin Signaling	1.05	0.752	0.104	NaN	PIK3R3,PIK3R1,IRS1,PIK3C2G,AKT3,IKBKE,NOS3,RASA1
Docosahexaenoic Acid (DHA) Signaling	1.05	0.752	0.115	NaN	PIK3R3,PIK3R1,IRS1,PIK3C2G,SERPINF1,AKT3
Ovarian Cancer Signaling	1.04	0.745	0.0903	NaN	GJA1,WNT9A,PIK3R1,PIK3C2G,WNT6,PIK3R3,WNT3A,EDN1,IRS1,CD44,AKT3,WNT11,FZD7
VDR/RXR Activation	1.03	0.731	0.103	NaN	CXCL10,SERPINB1,TNFSF11,GADD45A,TRPV6,CDKN1A,TGFB2,HSD17B2
Germ Cell-Sertoli Cell Junction Signaling	1.02	0.728	0.0867	NaN	PIK3R1,MAP3K1,PIK3C2G,PLS1,PIK3R3,TGFBR2,ITGA3,IRS1,RHOU,MAP3K7,TGFB2,ZYX,A2M,FNBP1,ACTN1
FcγRIIB Signaling in B Lymphocytes	1.02	0.728	0.113	NaN	BLNK,PIK3R3,PLCG2,PIK3R1,IRS1,PIK3C2G
UVB-Induced MAPK Signaling	1.01	0.716	0.106	NaN	PIK3R3,FOS,JUN,PIK3R1,IRS1,PIK3C2G,MAPK11
Death Receptor Signaling	1	0.716	0.0978	NaN	GAS2,NAIP,PARP4,IKBKE,TNFSF15,PARP11,CFLAR,BIRC3,CASP10
AMPK Signaling	0.99	0.704	0.0847	NaN	CAB39,PFKFB1,PIK3R1,PIK3C2G,NOS3,CREB5,MAPK11,PFKFB2,PIK3R3,PPP2R3A,IRS1,CDKN1A,MAP3K7,AKT3,ADRB2,PPARGC1A
Fcγ Receptor-mediated Phagocytosis in Macrophages and Monocytes	0.982	0.698	0.0968	NaN	PIK3R3,HMOX1,FYN,PTK2B,FCGR2A,PIK3R1,PIK3C2G,AKT3,FCGR1A
Melanoma Signaling	0.961	0.679	0.109	NaN	PIK3R3,PIK3R1,IRS1,CDKN1A,PIK3C2G,AKT3
Macropinocytosis Signaling	0.955	0.675	0.0988	NaN	MET,PIK3R3,ITGB2,CSF1,PLCG2,PIK3R1,IRS1,PIK3C2G
Natural Killer Cell Signaling	0.944	0.665	0.0902	NaN	PIK3R3,FYN,KLRC2,FCGR2A,PLCG2,PIK3R1,IRS1,ZAP70,PIK3C2G,NCR3,AKT3
Purine Nucleotides Degradation II (Aerobic)	0.942	0.665	0.15	NaN	ADA2,XDH,AOX1
Glycine Degradation (Creatine Biosynthesis)	0.935	0.66	0.5	NaN	GATM
Histidine Degradation VI	0.932	0.658	0.2	NaN	MICAL1,CYP7B1
CCR5 Signaling in Macrophages	0.929	0.658	0.101	NaN	FOS,CCR5,JUN,PTK2B,PLCG2,MAPK11,GNG12
Triacylglycerol Biosynthesis	0.918	0.648	0.114	NaN	AGPAT4,LPCAT2,LPIN1,PLPP3,LPIN2
Glioma Signaling	0.912	0.644	0.0909	NaN	PIK3R3,IGF2,PLCG2,PIK3R1,IRS1,CDKN1A,PIK3C2G,CAMK1G,AKT3,CDKN2B
Regulation of Cellular Mechanics by Calpain Protease	0.906	0.64	0.105	NaN	CAPN8,ITGA3,CAPN2,CAPN9,ACTN1,CAPN3
Allograft Rejection Signaling	0.889	0.624	0.0952	NaN	B2M,HLA-DRB1,HLA-DMA,HLA-A,HLA-DMB,HLA-F,HLA-DQA2,HLA-E
B Cell Development	0.878	0.615	0.121	NaN	HLA-DRB1,HLA-DMA,HLA-DMB,RAG1
Basal Cell Carcinoma Signaling	0.859	0.597	0.0972	NaN	WNT3A,WNT9A,PTCH1,WNT6,BMP5,WNT11,FZD7
Oncostatin M Signaling	0.844	0.586	0.118	NaN	JAK1,PLAU,STAT3,CHI3L1
Role of JAK2 in Hormone-like Cytokine Signaling	0.844	0.586	0.118	NaN	SOCS1,JAK1,IRS1,STAT3
GM-CSF Signaling	0.836	0.58	0.0959	NaN	ETS1,PIK3R3,PIK3R1,IRS1,PIK3C2G,AKT3,STAT3
nNOS Signaling in Neurons	0.829	0.575	0.106	NaN	CAPN8,DLG2,CAPN2,CAPN9,CAPN3
HER-2 Signaling in Breast Cancer	0.807	0.556	0.0909	NaN	PIK3R3,ITGB2,PIK3R1,IRS1,CDKN1A,PIK3C2G,AKT3,AREG
Altered T Cell and B Cell Signaling in Rheumatoid Arthritis	0.807	0.556	0.0909	NaN	TNFSF11,IL18,HLA-DRB1,CSF1,HLA-DMA,HLA-DMB,TLR1,LTB
Hepatic Cholestasis	0.803	0.554	0.0818	NaN	CXCL8,IL18,CYP7B1,JUN,NGFR,ADCY4,ADCY1,TGFB2,MAP3K7,ABCB11,IKBKE,ADCY10,IL1RAP
Acyl-CoA Hydrolysis	0.799	0.552	0.167	NaN	THEM5,THEM4
Antiproliferative Role of Somatostatin Receptor 2	0.793	0.549	0.0933	NaN	PIK3R3,PIK3R1,IRS1,CDKN1A,PIK3C2G,GUCY1A2,GNG12
Heparan Sulfate Biosynthesis	0.793	0.549	0.0933	NaN	HS6ST1,SULT1E1,XYLT1,SULT1A3/SULT1A4,CHST3,HS6ST2,SULT1A2
Rac Signaling	0.789	0.546	0.0855	NaN	PIK3R3,ITGA3,JUN,PTK2B,PIK3R1,IRS1,MAP3K1,PIK3C2G,CD44,PIP4K2A
VEGF Signaling	0.787	0.546	0.0874	NaN	PIK3R3,PTK2B,PLCG2,PIK3R1,IRS1,PIK3C2G,AKT3,NOS3,ACTN1
3-phosphoinositide Degradation	0.783	0.544	0.0822	NaN	INPP4A,CA3,PTPRJ,PPP2R3A,PTPRO,DUSP10,ACP5,NUDT4,RASA1,PTPRM,ALPL,DUSP2
Stearate Biosynthesis I (Animals)	0.779	0.544	0.111	NaN	THEM5,BDH2,ACSL4,THEM4
L-carnitine Biosynthesis	0.772	0.544	0.333	NaN	BBOX1
Thyronamine and Iodothyronamine Metabolism	0.772	0.544	0.333	NaN	DIO1
S-methyl-5-thio-α-D-ribose 1-phosphate Degradation	0.772	0.544	0.333	NaN	ADI1
Glutathione Biosynthesis	0.772	0.544	0.333	NaN	GCLC
Thyroid Hormone Metabolism I (via Deiodination)	0.772	0.544	0.333	NaN	DIO1
1D-myo-inositol Hexakisphosphate Biosynthesis V (from Ins(1,3,4)P3)	0.772	0.544	0.333	NaN	IPMK
SAPK/JNK Signaling	0.77	0.543	0.0865	NaN	PIK3R3,JUN,GADD45A,PIK3R1,IRS1,DUSP10,MAP3K1,PIK3C2G,MAP3K7
Ethanol Degradation II	0.749	0.524	0.108	NaN	ACSS3,DHRS2,ALDH1A3,ADHFE1
Guanosine Nucleotides Degradation III	0.743	0.52	0.154	NaN	XDH,AOX1
Calcium-induced T Lymphocyte Apoptosis	0.738	0.516	0.0938	NaN	HLA-DRB1,HLA-DMA,ZAP70,HLA-DMB,CAPN2,ITPR1
Factors Promoting Cardiogenesis in Vertebrates	0.733	0.513	0.087	NaN	TGFBR2,TGFBR3,TGFB2,MAP3K7,DKK1,BMP5,WNT11,FZD7
Ethanol Degradation IV	0.731	0.512	0.12	NaN	TYRP1,ACSS3,ALDH1A3
Notch Signaling	0.72	0.504	0.105	NaN	DTX4,MAML2,JAG1,DLL4
PXR/RXR Activation	0.716	0.504	0.0923	NaN	CYP3A7,CES3,AKT3,ABCB11,UGT1A7 (includes others),PPARGC1A
Hypoxia Signaling in the Cardiovascular System	0.716	0.504	0.0923	NaN	JUN,EDN1,UBE2E3,NOS3,CREB5,UBE2F
PPAR Signaling	0.716	0.504	0.086	NaN	FOS,IL18,JUN,NGFR,MAP3K7,IKBKE,IL1RAP,PPARGC1A
ILK Signaling	0.706	0.495	0.0765	NaN	PARVA,PIK3R1,PIK3C2G,CREB5,PIK3R3,ITGB2,FOS,JUN,PPP2R3A,IRS1,ARHGEF6,RHOU,AKT3,FNBP1,ACTN1
CD27 Signaling in Lymphocytes	0.702	0.493	0.0962	NaN	FOS,JUN,MAP3K1,MAP3K7,IKBKE
NAD Salvage Pathway II	0.696	0.488	0.115	NaN	NMRK1,NMNAT2,ACP5
Urate Biosynthesis/Inosine 5'-phosphate Degradation	0.693	0.487	0.143	NaN	XDH,AOX1
PI3K/AKT Signaling	0.681	0.477	0.0806	NaN	PIK3R3,ITGA3,JAK1,PPP2R3A,PIK3R1,CDKN1A,AKT3,IKBKE,NOS3,THEM4
Heparan Sulfate Biosynthesis (Late Stages)	0.676	0.474	0.0896	NaN	HS6ST1,SULT1E1,SULT1A3/SULT1A4,CHST3,HS6ST2,SULT1A2
GABA Receptor Signaling	0.676	0.474	0.0896	NaN	UBD,KCNN3,ADCY4,ADCY1,ADCY10,SLC6A12
Thyroid Cancer Signaling	0.666	0.471	0.1	NaN	CXCL10,NTRK2,BDNF,NTRK1
Neuroprotective Role of THOP1 in Alzheimer's Disease	0.666	0.471	0.1	NaN	HLA-A,MAPT,HLA-F,HLA-E
Uracil Degradation II (Reductive)	0.66	0.471	0.25	NaN	DPYD
Heme Degradation	0.66	0.471	0.25	NaN	HMOX1
Heme Biosynthesis from Uroporphyrinogen-III I	0.66	0.471	0.25	NaN	UROD
Catecholamine Biosynthesis	0.66	0.471	0.25	NaN	DDC
Thymine Degradation	0.66	0.471	0.25	NaN	DPYD
Acetate Conversion to Acetyl-CoA	0.66	0.471	0.25	NaN	ACSS3
ErbB2-ErbB3 Signaling	0.637	0.449	0.087	NaN	PIK3R3,JUN,PIK3R1,IRS1,PIK3C2G,STAT3
Small Cell Lung Cancer Signaling	0.626	0.439	0.0833	NaN	PIK3R3,PIK3R1,IRS1,PIK3C2G,AKT3,IKBKE,CDKN2B
UVC-Induced MAPK Signaling	0.617	0.431	0.0952	NaN	FOS,JUN,SMPD1,MAPK11
Ephrin Receptor Signaling	0.614	0.43	0.0747	NaN	EPHA7,EPHB6,FYN,EFNB2,ITGA3,SDC2,PIK3C2G,AKT3,STAT3,CREB5,RASA1,GNG12,FGF1
Extrinsic Prothrombin Activation Pathway	0.606	0.43	0.125	NaN	F7,TFPI
Chondroitin Sulfate Degradation (Metazoa)	0.606	0.43	0.125	NaN	GM2A,CD44
γ-glutamyl Cycle	0.606	0.43	0.125	NaN	GCLC,GGT1
Methylglyoxal Degradation III	0.606	0.43	0.125	NaN	AKR1B1,AKR1B10
Parkinson's Signaling	0.606	0.43	0.125	NaN	SNCAIP,MAPK11
RAR Activation	0.605	0.43	0.0737	NaN	PIK3R3,FOS,JUN,ALDH1A3,PNRC1,PIK3R1,ADCY4,MAP3K1,ADCY1,TGFB2,AKT3,ADCY10,MAPK11,PPARGC1A
Caveolar-mediated Endocytosis Signaling	0.601	0.427	0.0845	NaN	B2M,ITGB2,FYN,ITGA3,ITGAM,HLA-A
Role of p14/p19ARF in Tumor Suppression	0.593	0.422	0.093	NaN	PIK3R3,PIK3R1,IRS1,PIK3C2G
HIPPO signaling	0.593	0.422	0.0814	NaN	TEAD1,PPP2R3A,DLG2,CD44,FRMD6,STK3,PATJ
PAK Signaling	0.589	0.42	0.0792	NaN	PIK3R3,ITGA3,PTK2B,PIK3R1,IRS1,ARHGEF6,PIK3C2G,MYLK
α-Adrenergic Signaling	0.578	0.412	0.0805	NaN	PLCG2,ADCY4,ADCY1,ITPR1,ADCY10,SLC8A1,GNG12
Bladder Cancer Signaling	0.578	0.412	0.0805	NaN	CXCL8,MMP16,CDKN1A,FGF12,FGF7,MMP24,FGF1
Protein Citrullination	0.576	0.412	0.2	NaN	PADI1
Citrulline-Nitric Oxide Cycle	0.576	0.412	0.2	NaN	NOS3
γ-linolenate Biosynthesis II (Animals)	0.568	0.406	0.118	NaN	ACSL4,CYB5A
Dermatan Sulfate Degradation (Metazoa)	0.568	0.406	0.118	NaN	GM2A,CD44
Systemic Lupus Erythematosus Signaling	0.563	0.406	0.0711	NaN	HLA-A,FCGR2A,PIK3R1,PIK3C2G,NFATC4,FCGR1A,PIK3R3,BDKRB2,FOS,IL18,JUN,IRS1,PLCG2,AKT3,HLA-F,HLA-E
Neuregulin Signaling	0.563	0.406	0.0795	NaN	PIK3R3,ITGA3,PLCG2,PIK3R1,AKT3,HBEGF,AREG
G Beta Gamma Signaling	0.563	0.406	0.0795	NaN	PLCG2,ARHGEF6,ADCY1,AKT3,HBEGF,KCNJ3,GNG12
ATM Signaling	0.557	0.401	0.0847	NaN	JUN,GADD45A,CDKN1A,CREB5,MAPK11
4-1BB Signaling in T Lymphocytes	0.549	0.394	0.0968	NaN	JUN,IKBKE,MAPK11
Synaptic Long Term Potentiation	0.536	0.387	0.075	NaN	PLCE1,PLCG2,ADCY1,CACNA1C,PLCL2,ITPR1,PLCL1,PLCH2,CREB5
Gαi Signaling	0.536	0.387	0.075	NaN	NPR3,ADCY4,ADCY1,STAT3,ADORA1,ADCY10,HCAR2,GNG12,XCR1
phagosome maturation	0.536	0.387	0.075	NaN	B2M,ATP6V0A4,HLA-DRB1,HLA-A,RAB7B,ATP6V0D2,RILP,SNAP25,ATP6V1B1
Actin Cytoskeleton Signaling	0.536	0.387	0.0702	NaN	PIK3R1,PIK3C2G,MYLK,TTN,FGF1,PIK3R3,ITGA3,IRS1,FGF12,ARHGEF6,FGF7,PIP4K2A,ARHGAP24,GNG12,ACTN1,MSN
Acute Myeloid Leukemia Signaling	0.52	0.373	0.0769	NaN	PIK3R3,PIK3R1,IRS1,PIK3C2G,KIT,AKT3,STAT3
Role of PI3K/AKT Signaling in the Pathogenesis of Influenza	0.519	0.373	0.0789	NaN	PIK3R3,CCR5,PIK3R1,IRS1,PIK3C2G,AKT3
Serotonin and Melatonin Biosynthesis	0.509	0.372	0.167	NaN	DDC
Glycerol Degradation I	0.509	0.372	0.167	NaN	GPD1
Glycine Cleavage Complex	0.509	0.372	0.167	NaN	AMT
UDP-N-acetyl-D-glucosamine Biosynthesis II	0.509	0.372	0.167	NaN	FMO3
Zymosterol Biosynthesis	0.509	0.372	0.167	NaN	TM7SF2
Rapoport-Luebering Glycolytic Shunt	0.509	0.372	0.167	NaN	BPGM
NAD Biosynthesis III	0.509	0.372	0.167	NaN	NMNAT2
Activation of IRF by Cytosolic Pattern Recognition Receptors	0.505	0.37	0.0806	NaN	JUN,DDX58,IKBKE,IRF9,IFIT2
Non-Small Cell Lung Cancer Signaling	0.504	0.37	0.0779	NaN	PIK3R3,PIK3R1,IRS1,PIK3C2G,AKT3,ITPR1
GADD45 Signaling	0.5	0.37	0.105	NaN	GADD45A,CDKN1A
Glutathione Redox Reactions I	0.5	0.37	0.105	NaN	GPX8,GSTK1
Histamine Degradation	0.5	0.37	0.105	NaN	HNMT,ALDH1A3
Primary Immunodeficiency Signaling	0.491	0.362	0.0833	NaN	BLNK,ZAP70,CIITA,RAG1
Cyclins and Cell Cycle Regulation	0.49	0.362	0.0769	NaN	HDAC9,PPP2R3A,CDKN1A,TGFB2,CDKN2B,HDAC5
ERK5 Signaling	0.489	0.362	0.0794	NaN	FOS,RPS6KA6,NTRK1,RPS6KA2,CREB5
Prostate Cancer Signaling	0.479	0.354	0.0745	NaN	PIK3R3,PIK3R1,IRS1,CDKN1A,PIK3C2G,AKT3,CREB5
TWEAK Signaling	0.478	0.353	0.0882	NaN	NAIP,IKBKE,BIRC3
Insulin Receptor Signaling	0.473	0.352	0.0709	NaN	SCNN1A,PIK3R3,FYN,JAK1,SCNN1G,PIK3R1,IRS1,PIK3C2G,AKT3,GRB10
Endometrial Cancer Signaling	0.473	0.352	0.0781	NaN	PIK3R3,PIK3R1,IRS1,PIK3C2G,AKT3
Cell Cycle: G1/S Checkpoint Regulation	0.473	0.352	0.0781	NaN	HDAC9,CDKN1A,TGFB2,CDKN2B,HDAC5
Cardiomyocyte Differentiation via BMP Receptors	0.471	0.351	0.1	NaN	MAP3K7,BMP5
Hereditary Breast Cancer Signaling	0.463	0.345	0.0704	NaN	UBD,PIK3R3,HDAC9,GADD45A,PIK3R1,IRS1,CDKN1A,PIK3C2G,AKT3,HDAC5
NAD Biosynthesis from 2-amino-3-carboxymuconate Semialdehyde	0.455	0.339	0.143	NaN	NMNAT2
Adenine and Adenosine Salvage III	0.455	0.339	0.143	NaN	ADA2
Maturity Onset Diabetes of Young (MODY) Signaling	0.443	0.33	0.0952	NaN	CACNA1S,CACNA1C
Oxidative Ethanol Degradation III	0.443	0.33	0.0952	NaN	ACSS3,ALDH1A3
Epithelial Adherens Junction Signaling	0.424	0.312	0.0685	NaN	MET,TGFBR2,LMO7,TGFBR3,TGFB2,AKT3,ZYX,PTPRM,ACTN1,FGF1
Inositol Pyrophosphates Biosynthesis	0.409	0.302	0.125	NaN	IPMK
Purine Ribonucleosides Degradation to Ribose-1-phosphate	0.409	0.302	0.125	NaN	ADA2
Glycoaminoglycan-protein Linkage Region Biosynthesis	0.409	0.302	0.125	NaN	XYLT1
Sphingomyelin Metabolism	0.409	0.302	0.125	NaN	SMPD1
Agrin Interactions at Neuromuscular Junction	0.401	0.295	0.0725	NaN	ITGB2,ITGA3,JUN,ARHGEF6,LAMB1
Cholecystokinin/Gastrin-mediated Signaling	0.397	0.293	0.0693	NaN	FOS,IL18,JUN,PTK2B,RHOU,ITPR1,FNBP1
Differential Regulation of Cytokine Production in Intestinal Epithelial Cells by IL-17A and IL-17F	0.394	0.29	0.087	NaN	CCL2,LCN2
Signaling by Rho Family GTPases	0.389	0.287	0.0648	NaN	CDH18,PTK2B,PIK3R1,PIK3C2G,MYLK,PIK3R3,FOS,ITGA3,JUN,IRS1,ARHGEF6,RHOU,PIP4K2A,FNBP1,GNG12,MSN
Myc Mediated Apoptosis Signaling	0.388	0.287	0.0714	NaN	PIK3R3,PIK3R1,IRS1,PIK3C2G,AKT3
Netrin Signaling	0.381	0.282	0.0769	NaN	PRKG1,ABLIM3,NFATC4
Tight Junction Signaling	0.381	0.282	0.0659	NaN	TGFBR2,MPDZ,FOS,JUN,PPP2R3A,NGFR,TGFB2,AKT3,MYLK,PATJ,SNAP25
Melatonin Signaling	0.376	0.278	0.0704	NaN	PLCE1,PLCG2,PLCL2,PLCL1,PLCH2
CDP-diacylglycerol Biosynthesis I	0.371	0.278	0.0833	NaN	AGPAT4,LPCAT2
Leucine Degradation I	0.37	0.278	0.111	NaN	MCCC2
Heme Biosynthesis II	0.37	0.278	0.111	NaN	UROD
Ketolysis	0.37	0.278	0.111	NaN	BDH2
Role of PKR in Interferon Induction and Antiviral Response	0.365	0.273	0.075	NaN	MAP3K7,IKBKE,FCGR1A
ErbB4 Signaling	0.364	0.273	0.0694	NaN	PIK3R3,PLCG2,PIK3R1,IRS1,PIK3C2G
fMLP Signaling in Neutrophils	0.358	0.269	0.0661	NaN	PIK3R3,FPR3,PIK3R1,IRS1,PIK3C2G,ITPR1,NFATC4,GNG12
Breast Cancer Regulation by Stathmin1	0.355	0.267	0.064	NaN	ADCY4,PIK3R1,PIK3C2G,ITPR1,PIK3R3,PPP2R3A,IRS1,ADCY1,ARHGEF6,CDKN1A,CAMK1G,ADCY10,GNG12
Superpathway of D-myo-inositol (1,4,5)-trisphosphate Metabolism	0.351	0.265	0.08	NaN	IPMK,INPP1
Gluconeogenesis I	0.351	0.265	0.08	NaN	ME3,BPGM
Nur77 Signaling in T Lymphocytes	0.35	0.265	0.0702	NaN	HDAC9,HLA-DRB1,HLA-DMA,HLA-DMB
Ketogenesis	0.337	0.255	0.1	NaN	BDH2
Calcium Transport I	0.337	0.255	0.1	NaN	ATP2B4
Antiproliferative Role of TOB in T Cell Signaling	0.331	0.251	0.0769	NaN	TGFBR2,TGFB2
Phosphatidylglycerol Biosynthesis II (Non-plastidic)	0.331	0.251	0.0769	NaN	AGPAT4,LPCAT2
Role of RIG1-like Receptors in Antiviral Innate Immunity	0.319	0.242	0.0698	NaN	DDX58,IKBKE,CASP10
Role of Wnt/GSK-3β Signaling in the Pathogenesis of Influenza	0.319	0.242	0.0658	NaN	WNT3A,WNT9A,WNT6,WNT11,FZD7
BMP signaling pathway	0.319	0.242	0.0658	NaN	JUN,MAP3K7,HOXC9,MAPK11,BMP5
Induction of Apoptosis by HIV1	0.313	0.237	0.0667	NaN	NAIP,NGFR,IKBKE,BIRC3
Hematopoiesis from Multipotent Stem Cells	0.281	0.207	0.0833	NaN	CSF1
Intrinsic Prothrombin Activation Pathway	0.28	0.207	0.069	NaN	F8,COL10A1
Sonic Hedgehog Signaling	0.265	0.196	0.0667	NaN	DYRK1B,PTCH1
Assembly of RNA Polymerase III Complex	0.258	0.196	0.0769	NaN	GTF3C3
Fatty Acid Activation	0.258	0.196	0.0769	NaN	ACSL4
Choline Biosynthesis III	0.258	0.196	0.0769	NaN	HMOX1
Oleate Biosynthesis II (Animals)	0.258	0.196	0.0769	NaN	CYB5A
Cholesterol Biosynthesis I	0.258	0.196	0.0769	NaN	TM7SF2
NAD Phosphorylation and Dephosphorylation	0.258	0.196	0.0769	NaN	ACP5
Bile Acid Biosynthesis, Neutral Pathway	0.258	0.196	0.0769	NaN	AKR1D1
Cholesterol Biosynthesis II (via 24,25-dihydrolanosterol)	0.258	0.196	0.0769	NaN	TM7SF2
Cholesterol Biosynthesis III (via Desmosterol)	0.258	0.196	0.0769	NaN	TM7SF2
Cell Cycle: G2/M DNA Damage Checkpoint Regulation	0.245	0.186	0.0612	NaN	GADD45A,CDKN1A,HIPK2
Cancer Drug Resistance By Drug Efflux	0.245	0.186	0.0612	NaN	PIK3R3,PIK3R1,AKT3
DNA Double-Strand Break Repair by Non-Homologous End Joining	0.238	0.184	0.0714	NaN	LIG4
Androgen Biosynthesis	0.238	0.184	0.0714	NaN	SRD5A2
Superpathway of Citrulline Metabolism	0.238	0.184	0.0714	NaN	NOS3
Leukotriene Biosynthesis	0.238	0.184	0.0714	NaN	GGT1
Cytotoxic T Lymphocyte-mediated Apoptosis of Target Cells	0.238	0.184	0.0625	NaN	B2M,HLA-A
G Protein Signaling Mediated by Tubby	0.238	0.184	0.0625	NaN	PLCG2,GNG12
nNOS Signaling in Skeletal Muscle Cells	0.219	0.169	0.0667	NaN	CAPN3
NAD biosynthesis II (from tryptophan)	0.219	0.169	0.0667	NaN	NMNAT2
Vitamin-C Transport	0.219	0.169	0.0667	NaN	SLC2A3

## Sheet: MM134&SUM44 co-upreg pathway
IPA pathway results: using the 181 upregulated genes in MM134 and SUM44 LTED cells
Ingenuity Canonical Pathways	-log(p-value)	-log(B-H p-value)	Ratio	z-score	Molecules
UDP-D-xylose and UDP-D-glucuronate Biosynthesis	4.23	1.88	1	NaN	UXS1,UGDH
Adipogenesis pathway	4.1	1.88	0.0522	NaN	FZD8,DDIT3,SREBF1,FGFR4,XBP1,KLF3,TNF
Colanic Acid Building Blocks Biosynthesis	3.82	1.84	0.214	NaN	UGDH,PMM1,PMM2
D-glucuronate Degradation I	3.76	1.84	0.667	NaN	DCXR,CRYL1
Unfolded protein response	3.11	1.32	0.0741	NaN	DDIT3,SREBF1,XBP1,HSPA2
GDP-mannose Biosynthesis	3.07	1.32	0.333	NaN	PMM1,PMM2
PTEN Signaling	2.65	1.05	0.042	NaN	FGFR4,MAPK3,MAGIX,BMPR1B,TNFRSF11A
STAT3 Pathway	2.62	1.05	0.0548	NaN	FGFR4,MAPK3,BMPR1B,TNFRSF11A
LXR/RXR Activation	2.62	1.05	0.0413	NaN	SCD,ALB,SREBF1,FASN,TNF
FXR/RXR Activation	2.54	1.02	0.0397	NaN	ALB,SREBF1,FGFR4,FASN,TNF
14-3-3-mediated Signaling	2.48	1	0.0385	NaN	FGFR4,MAPK3,TUBB2A,TUBA4A,TNF
IL-9 Signaling	2.31	0.863	0.0667	NaN	FGFR4,BCL3,TNF
Ceramide Signaling	2.24	0.835	0.043	NaN	S1PR3,FGFR4,MAPK3,TNF
TR/RXR Activation	2.16	0.798	0.0408	NaN	SREBF1,FGFR4,FASN,BCL3
PAK Signaling	2.12	0.798	0.0396	NaN	ARHGAP10,FGFR4,MAPK3,TNF
Glutamate Removal from Folates	2.12	0.798	1	NaN	GGH
Gap Junction Signaling	2.02	0.747	0.0298	NaN	ADCY2,FGFR4,MAPK3,TUBB2A,TUBA4A
Germ Cell-Sertoli Cell Junction Signaling	1.97	0.747	0.0289	NaN	FGFR4,MAPK3,TUBB2A,TUBA4A,TNF
Endoplasmic Reticulum Stress Pathway	1.95	0.747	0.0952	NaN	DDIT3,XBP1
Colorectal Cancer Metastasis Signaling	1.92	0.747	0.0243	NaN	FZD8,ADCY2,FGFR4,MAPK3,TNF,MMP17
PPARα/RXRα Activation	1.92	0.747	0.0281	NaN	ADCY2,FASN,MAPK3,PRKAA2,BCL3
Renin-Angiotensin Signaling	1.86	0.747	0.0333	NaN	ADCY2,FGFR4,MAPK3,TNF
UVB-Induced MAPK Signaling	1.85	0.747	0.0455	NaN	FGFR4,MAPK3,EIF4EBP1
Role of NANOG in Mammalian Embryonic Stem Cell Pluripotency	1.84	0.747	0.0328	NaN	FZD8,FGFR4,MAPK3,BMPR1B
Sphingosine-1-phosphate Signaling	1.84	0.747	0.0328	NaN	S1PR3,ADCY2,FGFR4,MAPK3
Palmitate Biosynthesis I (Animals)	1.82	0.747	0.5	NaN	FASN
Fatty Acid Biosynthesis Initiation II	1.82	0.747	0.5	NaN	FASN
IL-17A Signaling in Gastric Cells	1.81	0.747	0.08	NaN	MAPK3,TNF
Superpathway of D-myo-inositol (1,4,5)-trisphosphate Metabolism	1.81	0.747	0.08	NaN	ITPKC,IMPA2
Type II Diabetes Mellitus Signaling	1.78	0.736	0.0315	NaN	FGFR4,MAPK3,PRKAA2,TNF
Role of JAK1 and JAK3 in γc Cytokine Signaling	1.76	0.733	0.0423	NaN	IL4R,FGFR4,MAPK3
ERK/MAPK Signaling	1.73	0.732	0.0251	NaN	MYCN,FGFR4,MAPK3,DUSP4,EIF4EBP1
Superpathway of Cholesterol Biosynthesis	1.71	0.732	0.0714	NaN	DHCR7,ACAT1
Breast Cancer Regulation by Stathmin1	1.7	0.732	0.0246	NaN	ADCY2,FGFR4,MAPK3,TUBB2A,TUBA4A
IL-15 Signaling	1.69	0.732	0.0395	NaN	FGFR4,MAPK3,TNF
Neurotrophin/TRK Signaling	1.69	0.732	0.0395	NaN	SPRY1,FGFR4,MAPK3
BMP signaling pathway	1.69	0.732	0.0395	NaN	MAPK3,BMPR1B,CHRD
Role of Pattern Recognition Receptors in Recognition of Bacteria and Viruses	1.67	0.731	0.0292	NaN	FGFR4,MAPK3,TNF,C5
N-acetylglucosamine Degradation I	1.64	0.711	0.333	NaN	GNPDA2
IL-12 Signaling and Production in Macrophages	1.58	0.664	0.0274	NaN	ALB,FGFR4,MAPK3,TNF
FLT3 Signaling in Hematopoietic Progenitor Cells	1.56	0.66	0.0353	NaN	FGFR4,MAPK3,EIF4EBP1
Leptin Signaling in Obesity	1.56	0.66	0.0353	NaN	ADCY2,FGFR4,MAPK3
Airway Inflammation in Asthma	1.52	0.652	0.25	NaN	TNF
Myo-inositol Biosynthesis	1.52	0.652	0.25	NaN	IMPA2
N-acetylglucosamine Degradation II	1.52	0.652	0.25	NaN	GNPDA2
Stearate Biosynthesis I (Animals)	1.51	0.652	0.0556	NaN	FASN,ELOVL6
eNOS Signaling	1.5	0.652	0.0258	NaN	ADCY2,FGFR4,PRKAA2,HSPA2
Acute Myeloid Leukemia Signaling	1.48	0.646	0.033	NaN	FGFR4,MAPK3,EIF4EBP1
Role of Osteoblasts, Osteoclasts and Chondrocytes in Rheumatoid Arthritis	1.48	0.646	0.0216	NaN	FZD8,FGFR4,MAPK3,TNFRSF11A,TNF
Hepatic Cholestasis	1.47	0.644	0.0252	NaN	ADCY2,SREBF1,FGFR4,TNF
Melanocyte Development and Pigmentation Signaling	1.44	0.622	0.0316	NaN	ADCY2,FGFR4,MAPK3
Acute Phase Response Signaling	1.39	0.579	0.0237	NaN	ALB,MAPK3,TNF,C5
RANK Signaling in Osteoclasts	1.37	0.572	0.0297	NaN	FGFR4,MAPK3,TNFRSF11A
UVA-Induced MAPK Signaling	1.36	0.57	0.0294	NaN	FGFR4,MAPK3,PARP8
Granulocyte Adhesion and Diapedesis	1.32	0.558	0.0226	NaN	CD99,TNF,MMP17,C5
Mouse Embryonic Stem Cell Pluripotency	1.32	0.558	0.0283	NaN	FZD8,FGFR4,MAPK3
IGF-1 Signaling	1.32	0.558	0.0283	NaN	IGFBP4,FGFR4,MAPK3
Sertoli Cell-Sertoli Cell Junction Signaling	1.32	0.558	0.0225	NaN	MAPK3,TUBB2A,TUBA4A,TNF
NF-κB Signaling	1.3	0.551	0.0222	NaN	FGFR4,BMPR1B,TNFRSF11A,TNF
G-Protein Coupled Receptor Signaling	1.24	0.538	0.0185	NaN	S1PR3,ADCY2,FGFR4,MAPK3,DUSP4
AMPK Signaling	1.24	0.538	0.0212	NaN	FGFR4,FASN,PRKAA2,EIF4EBP1
Agranulocyte Adhesion and Diapedesis	1.24	0.538	0.0212	NaN	CD99,TNF,MMP17,C5
HIF1α Signaling	1.23	0.538	0.0261	NaN	FGFR4,MAPK3,MMP17
Airway Pathology in Chronic Obstructive Pulmonary Disease	1.22	0.538	0.125	NaN	TNF
p38 MAPK Signaling	1.21	0.538	0.0256	NaN	CDC25B,DDIT3,TNF
NRF2-mediated Oxidative Stress Response	1.21	0.538	0.0207	NaN	AKR7A3,FGFR4,MAPK3,MAFF
Production of Nitric Oxide and Reactive Oxygen Species in Macrophages	1.21	0.538	0.0207	NaN	ALB,FGFR4,MAPK3,TNF
EIF2 Signaling	1.21	0.538	0.0206	NaN	RPL27A,RPL8,FGFR4,MAPK3
Fc Epsilon RI Signaling	1.2	0.538	0.0252	NaN	FGFR4,MAPK3,TNF
Gαi Signaling	1.19	0.538	0.025	NaN	S1PR3,ADCY2,MAPK3
phagosome maturation	1.19	0.538	0.025	NaN	TUBB2A,TUBA4A,VPS37C
Melanoma Signaling	1.18	0.538	0.0364	NaN	FGFR4,MAPK3
Ketolysis	1.17	0.538	0.111	NaN	ACAT1
mTOR Signaling	1.17	0.538	0.0201	NaN	FGFR4,MAPK3,PRKAA2,EIF4EBP1
Molecular Mechanisms of Cancer	1.17	0.538	0.016	NaN	CDC25B,FZD8,ADCY2,FGFR4,MAPK3,BMPR1B
Xenobiotic Metabolism Signaling	1.16	0.538	0.0175	NaN	SULT1C4,FGFR4,MAPK3,GRIP1,TNF
Glucocorticoid Receptor Signaling	1.15	0.538	0.0174	NaN	FGFR4,MAPK3,PRKAA2,TNF,HSPA2
Glutamate Receptor Signaling	1.15	0.538	0.0351	NaN	HOMER1,GRIP1
Ketogenesis	1.13	0.538	0.1	NaN	ACAT1
Calcium Transport I	1.13	0.538	0.1	NaN	ATP2C2
IL-6 Signaling	1.13	0.538	0.0236	NaN	FGFR4,MAPK3,TNF
MSP-RON Signaling Pathway	1.12	0.538	0.0339	NaN	FGFR4,TNF
p70S6K Signaling	1.1	0.538	0.0229	NaN	IL4R,FGFR4,MAPK3
P2Y Purigenic Receptor Signaling Pathway	1.09	0.538	0.0227	NaN	ADCY2,FGFR4,MAPK3
Dolichyl-diphosphooligosaccharide Biosynthesis	1.09	0.538	0.0909	NaN	ALG3
UDP-N-acetyl-D-galactosamine Biosynthesis II	1.09	0.538	0.0909	NaN	GNPDA2
HMGB1 Signaling	1.08	0.538	0.0226	NaN	FGFR4,MAPK3,TNF
CNTF Signaling	1.08	0.538	0.0317	NaN	FGFR4,MAPK3
Endometrial Cancer Signaling	1.06	0.538	0.0312	NaN	FGFR4,MAPK3
Pyridoxal 5'-phosphate Salvage Pathway	1.06	0.538	0.0312	NaN	MAPK3,PRKAA2
IL-2 Signaling	1.06	0.538	0.0312	NaN	FGFR4,MAPK3
Glutaryl-CoA Degradation	1.05	0.538	0.0833	NaN	ACAT1
PXR/RXR Activation	1.05	0.538	0.0308	NaN	SCD,TNF
Thrombopoietin Signaling	1.05	0.538	0.0308	NaN	FGFR4,MAPK3
Role of Macrophages, Fibroblasts and Endothelial Cells in Rheumatoid Arthritis	1.05	0.538	0.0162	NaN	FZD8,FGFR4,MAPK3,TNF,C5
cAMP-mediated signaling	1.04	0.538	0.0181	NaN	S1PR3,ADCY2,MAPK3,DUSP4
Aryl Hydrocarbon Receptor Signaling	1.03	0.538	0.0214	NaN	TFF1,MAPK3,TNF
Lymphotoxin β Receptor Signaling	1.03	0.538	0.0299	NaN	FGFR4,MAPK3
Role of IL-17A in Arthritis	1.03	0.538	0.0299	NaN	FGFR4,MAPK3
Superpathway of Inositol Phosphate Compounds	1.03	0.538	0.0179	NaN	CDC25B,FGFR4,ITPKC,PLCH1
Insulin Receptor Signaling	1.03	0.538	0.0213	NaN	FGFR4,MAPK3,EIF4EBP1
Systemic Lupus Erythematosus Signaling	1.02	0.538	0.0178	NaN	FGFR4,MAPK3,TNF,C5
Oleate Biosynthesis II (Animals)	1.02	0.538	0.0769	NaN	SCD
Cholesterol Biosynthesis I	1.02	0.538	0.0769	NaN	DHCR7
Mevalonate Pathway I	1.02	0.538	0.0769	NaN	ACAT1
Cholesterol Biosynthesis II (via 24,25-dihydrolanosterol)	1.02	0.538	0.0769	NaN	DHCR7
Cholesterol Biosynthesis III (via Desmosterol)	1.02	0.538	0.0769	NaN	DHCR7
IL-10 Signaling	1.02	0.538	0.0294	NaN	IL4R,TNF
Remodeling of Epithelial Adherens Junctions	1.02	0.538	0.0294	NaN	TUBB2A,TUBA4A
EGF Signaling	1.02	0.538	0.0294	NaN	FGFR4,MAPK3
Human Embryonic Stem Cell Pluripotency	1.01	0.536	0.021	NaN	S1PR3,FZD8,FGFR4
ErbB2-ErbB3 Signaling	1.01	0.536	0.029	NaN	FGFR4,MAPK3
Ovarian Cancer Signaling	1.01	0.536	0.0208	NaN	FZD8,FGFR4,MAPK3
Glioma Invasiveness Signaling	0.998	0.532	0.0286	NaN	FGFR4,MAPK3
Isoleucine Degradation I	0.991	0.529	0.0714	NaN	ACAT1
T Helper Cell Differentiation	0.987	0.529	0.0282	NaN	IL4R,TNF
Role of MAPK Signaling in the Pathogenesis of Influenza	0.977	0.527	0.0278	NaN	MAPK3,TNF
ErbB4 Signaling	0.977	0.527	0.0278	NaN	FGFR4,MAPK3
GM-CSF Signaling	0.967	0.522	0.0274	NaN	FGFR4,MAPK3
Relaxin Signaling	0.966	0.522	0.02	NaN	ADCY2,FGFR4,MAPK3
TREM1 Signaling	0.948	0.518	0.0267	NaN	MAPK3,TNF
Antiproliferative Role of Somatostatin Receptor 2	0.948	0.518	0.0267	NaN	FGFR4,MAPK3
Role of PI3K/AKT Signaling in the Pathogenesis of Influenza	0.938	0.518	0.0263	NaN	FGFR4,MAPK3
GDNF Family Ligand-Receptor Interactions	0.938	0.518	0.0263	NaN	FGFR4,MAPK3
γ-glutamyl Cycle	0.936	0.518	0.0625	NaN	CHAC1
Methylglyoxal Degradation III	0.936	0.518	0.0625	NaN	AKR7A3
Non-Small Cell Lung Cancer Signaling	0.929	0.518	0.026	NaN	FGFR4,MAPK3
Estrogen-Dependent Breast Cancer Signaling	0.929	0.518	0.026	NaN	FGFR4,MAPK3
IL-17A Signaling in Airway Cells	0.929	0.518	0.026	NaN	FGFR4,MAPK3
Regulation of eIF4 and p70S6K Signaling	0.922	0.518	0.0191	NaN	FGFR4,MAPK3,EIF4EBP1
CD40 Signaling	0.92	0.518	0.0256	NaN	FGFR4,MAPK3
Superpathway of Geranylgeranyldiphosphate Biosynthesis I (via Mevalonate)	0.912	0.518	0.0588	NaN	ACAT1
Erythropoietin Signaling	0.911	0.518	0.0253	NaN	FGFR4,MAPK3
Regulation of IL-2 Expression in Activated and Anergic T Lymphocytes	0.911	0.518	0.0253	NaN	MAPK3,TOB1
Glioblastoma Multiforme Signaling	0.91	0.518	0.0189	NaN	FZD8,FGFR4,MAPK3
Growth Hormone Signaling	0.893	0.514	0.0247	NaN	FGFR4,MAPK3
Renal Cell Carcinoma Signaling	0.893	0.514	0.0247	NaN	FGFR4,MAPK3
Differential Regulation of Cytokine Production in Macrophages and T Helper Cells by IL-17A and IL-17F	0.889	0.514	0.0556	NaN	TNF
D-myo-inositol (1,4,5)-trisphosphate Degradation	0.889	0.514	0.0556	NaN	IMPA2
Axonal Guidance Signaling	0.885	0.514	0.0134	NaN	FZD8,FGFR4,MAPK3,TUBB2A,TUBA4A,ROBO1
IL-3 Signaling	0.876	0.514	0.0241	NaN	FGFR4,MAPK3
Prolactin Signaling	0.876	0.514	0.0241	NaN	FGFR4,MAPK3
JAK/Stat Signaling	0.876	0.514	0.0241	NaN	FGFR4,MAPK3
CXCR4 Signaling	0.875	0.514	0.0182	NaN	ADCY2,FGFR4,MAPK3
Aldosterone Signaling in Epithelial Cells	0.87	0.514	0.0181	NaN	FGFR4,MAPK3,HSPA2
PEDF Signaling	0.868	0.514	0.0238	NaN	FGFR4,MAPK3
IL-17 Signaling	0.859	0.514	0.0235	NaN	FGFR4,MAPK3
LPS-stimulated MAPK Signaling	0.851	0.514	0.0233	NaN	FGFR4,MAPK3
NF-κB Activation by Viruses	0.851	0.514	0.0233	NaN	FGFR4,MAPK3
Cardiomyocyte Differentiation via BMP Receptors	0.846	0.514	0.05	NaN	BMPR1B
1D-myo-inositol Hexakisphosphate Biosynthesis II (Mammalian)	0.846	0.514	0.05	NaN	ITPKC
D-myo-inositol (1,3,4)-trisphosphate Biosynthesis	0.846	0.514	0.05	NaN	ITPKC
α-Adrenergic Signaling	0.843	0.514	0.023	NaN	ADCY2,MAPK3
Bladder Cancer Signaling	0.843	0.514	0.023	NaN	MAPK3,MMP17
IL-4 Signaling	0.843	0.514	0.023	NaN	IL4R,FGFR4
TGF-β Signaling	0.843	0.514	0.023	NaN	MAPK3,BMPR1B
G Beta Gamma Signaling	0.835	0.512	0.0227	NaN	ADCY2,MAPK3
VEGF Family Ligand-Receptor Interactions	0.835	0.512	0.0227	NaN	FGFR4,MAPK3
Apoptosis Signaling	0.828	0.511	0.0225	NaN	MAPK3,TNF
Tryptophan Degradation III (Eukaryotic)	0.826	0.511	0.0476	NaN	ACAT1
Inflammasome pathway	0.826	0.511	0.0476	NaN	CTSB
FGF Signaling	0.82	0.51	0.0222	NaN	FGFR4,MAPK3
PDGF Signaling	0.82	0.51	0.0222	NaN	FGFR4,MAPK3
Factors Promoting Cardiogenesis in Vertebrates	0.805	0.5	0.0217	NaN	FZD8,BMPR1B
Death Receptor Signaling	0.805	0.5	0.0217	NaN	PARP8,TNF
Salvage Pathways of Pyrimidine Ribonucleotides	0.797	0.498	0.0215	NaN	MAPK3,PRKAA2
PPAR Signaling	0.797	0.498	0.0215	NaN	MAPK3,TNF
Prostate Cancer Signaling	0.79	0.496	0.0213	NaN	FGFR4,MAPK3
Differential Regulation of Cytokine Production in Intestinal Epithelial Cells by IL-17A and IL-17F	0.79	0.496	0.0435	NaN	TNF
Hepatic Fibrosis / Hepatic Stellate Cell Activation	0.781	0.489	0.0164	NaN	IGFBP4,IL4R,TNF
CREB Signaling in Neurons	0.776	0.487	0.0163	NaN	ADCY2,FGFR4,MAPK3
IL-22 Signaling	0.773	0.486	0.0417	NaN	MAPK3
ErbB Signaling	0.762	0.481	0.0204	NaN	FGFR4,MAPK3
Endothelin-1 Signaling	0.762	0.481	0.016	NaN	ADCY2,FGFR4,MAPK3
Role of JAK family kinases in IL-6-type Cytokine Signaling	0.757	0.481	0.04	NaN	MAPK3
CDK5 Signaling	0.755	0.481	0.0202	NaN	ADCY2,MAPK3
FAK Signaling	0.755	0.481	0.0202	NaN	FGFR4,MAPK3
Regulation of the Epithelial-Mesenchymal Transition Pathway	0.752	0.48	0.0159	NaN	FZD8,FGFR4,MAPK3
Dendritic Cell Maturation	0.748	0.478	0.0158	NaN	FGFR4,MAPK3,TNF
Cholecystokinin/Gastrin-mediated Signaling	0.742	0.477	0.0198	NaN	MAPK3,TNF
Antiproliferative Role of TOB in T Cell Signaling	0.742	0.477	0.0385	NaN	TOB1
Role of NFAT in Cardiac Hypertrophy	0.739	0.476	0.0156	NaN	ADCY2,FGFR4,MAPK3
Antioxidant Action of Vitamin C	0.729	0.472	0.0194	NaN	MAPK3,TNF
VEGF Signaling	0.729	0.472	0.0194	NaN	FGFR4,MAPK3
D-myo-inositol (1,4,5)-Trisphosphate Biosynthesis	0.727	0.472	0.037	NaN	PLCH1
Chronic Myeloid Leukemia Signaling	0.723	0.472	0.0192	NaN	FGFR4,MAPK3
SAPK/JNK Signaling	0.723	0.472	0.0192	NaN	FGFR4,DUSP4
ILK Signaling	0.721	0.472	0.0153	NaN	FGFR4,MAPK3,TNF
Clathrin-mediated Endocytosis Signaling	0.716	0.472	0.0152	NaN	ALB,FGFR4,MYO1E
IL-8 Signaling	0.716	0.472	0.0152	NaN	FGFR4,MAPK3,EIF4EBP1
TNFR2 Signaling	0.699	0.46	0.0345	NaN	TNF
Glutathione-mediated Detoxification	0.699	0.46	0.0345	NaN	GGH
Gαs Signaling	0.692	0.458	0.0183	NaN	ADCY2,MAPK3
T Cell Receptor Signaling	0.692	0.458	0.0183	NaN	FGFR4,MAPK3
Thrombin Signaling	0.69	0.458	0.0148	NaN	ADCY2,FGFR4,MAPK3
Glioma Signaling	0.686	0.456	0.0182	NaN	FGFR4,MAPK3
Corticotropin Releasing Hormone Signaling	0.68	0.454	0.018	NaN	ADCY2,MAPK3
Telomerase Signaling	0.68	0.454	0.018	NaN	FGFR4,MAPK3
4-1BB Signaling in T Lymphocytes	0.673	0.45	0.0323	NaN	MAPK3
Nitric Oxide Signaling in the Cardiovascular System	0.669	0.447	0.0177	NaN	FGFR4,MAPK3
Neuropathic Pain Signaling In Dorsal Horn Neurons	0.663	0.445	0.0175	NaN	FGFR4,MAPK3
Leukocyte Extravasation Signaling	0.662	0.445	0.0143	NaN	CD99,FGFR4,MMP17
HGF Signaling	0.657	0.442	0.0174	NaN	FGFR4,MAPK3
MIF-mediated Glucocorticoid Regulation	0.649	0.438	0.0303	NaN	MAPK3
Rac Signaling	0.646	0.438	0.0171	NaN	FGFR4,MAPK3
NGF Signaling	0.646	0.438	0.0171	NaN	FGFR4,MAPK3
Pancreatic Adenocarcinoma Signaling	0.641	0.434	0.0169	NaN	FGFR4,MAPK3
Oncostatin M Signaling	0.638	0.434	0.0294	NaN	MAPK3
IL-17A Signaling in Fibroblasts	0.627	0.428	0.0286	NaN	MAPK3
Dopamine Degradation	0.627	0.428	0.0286	NaN	SULT1C4
fMLP Signaling in Neutrophils	0.625	0.428	0.0165	NaN	FGFR4,MAPK3
Natural Killer Cell Signaling	0.62	0.428	0.0164	NaN	FGFR4,MAPK3
Role of Tissue Factor in Cancer	0.62	0.428	0.0164	NaN	FGFR4,MAPK3
LPS/IL-1 Mediated Inhibition of RXR Function	0.62	0.428	0.0136	NaN	SULT1C4,SREBF1,TNF
PI3K/AKT Signaling	0.61	0.42	0.0161	NaN	MAPK3,EIF4EBP1
Complement System	0.606	0.418	0.027	NaN	C5
Notch Signaling	0.596	0.412	0.0263	NaN	HES1
Atherosclerosis Signaling	0.595	0.412	0.0157	NaN	ALB,TNF
PI3K Signaling in B Lymphocytes	0.59	0.412	0.0156	NaN	IL4R,MAPK3
tRNA Charging	0.586	0.412	0.0256	NaN	AARS
Inhibition of Matrix Metalloproteases	0.586	0.412	0.0256	NaN	MMP17
GNRH Signaling	0.585	0.412	0.0155	NaN	ADCY2,MAPK3
CCR3 Signaling in Eosinophils	0.581	0.412	0.0154	NaN	FGFR4,MAPK3
Gα12/13 Signaling	0.581	0.412	0.0154	NaN	FGFR4,MAPK3
PKCθ Signaling in T Lymphocytes	0.581	0.412	0.0154	NaN	FGFR4,MAPK3
Role of PKR in Interferon Induction and Antiviral Response	0.577	0.412	0.025	NaN	TNF
Thyroid Cancer Signaling	0.577	0.412	0.025	NaN	MAPK3
Thyroid Hormone Metabolism II (via Conjugation and/or Degradation)	0.577	0.412	0.025	NaN	SULT1C4
Cardiac Hypertrophy Signaling	0.571	0.409	0.0128	NaN	ADCY2,FGFR4,MAPK3
MIF Regulation of Innate Immunity	0.568	0.409	0.0244	NaN	MAPK3
Mechanisms of Viral Exit from Host Cells	0.568	0.409	0.0244	NaN	VPS37C
UVC-Induced MAPK Signaling	0.559	0.402	0.0238	NaN	MAPK3
Huntington's Disease Signaling	0.551	0.401	0.0124	NaN	FGFR4,MAPK3,HSPA2
Role of Hypercytokinemia/hyperchemokinemia in the Pathogenesis of Influenza	0.55	0.401	0.0233	NaN	TNF
Role of p14/p19ARF in Tumor Suppression	0.55	0.401	0.0233	NaN	FGFR4
Serotonin Receptor Signaling	0.55	0.401	0.0233	NaN	ADCY2
Role of IL-17F in Allergic Inflammatory Airway Diseases	0.542	0.396	0.0227	NaN	MAPK3
Triacylglycerol Biosynthesis	0.542	0.396	0.0227	NaN	ELOVL6
Dermatan Sulfate Biosynthesis (Late Stages)	0.526	0.382	0.0217	NaN	SULT1C4
Epithelial Adherens Junction Signaling	0.512	0.371	0.0137	NaN	TUBB2A,TUBA4A
Graft-versus-Host Disease Signaling	0.51	0.371	0.0208	NaN	TNF
D-myo-inositol-5-phosphate Metabolism	0.508	0.371	0.0136	NaN	CDC25B,PLCH1
TNFR1 Signaling	0.503	0.371	0.0204	NaN	TNF
Chondroitin Sulfate Biosynthesis (Late Stages)	0.503	0.371	0.0204	NaN	SULT1C4
Cell Cycle: G2/M DNA Damage Checkpoint Regulation	0.503	0.371	0.0204	NaN	CDC25B
Cancer Drug Resistance By Drug Efflux	0.503	0.371	0.0204	NaN	MAPK3
Amyloid Processing	0.489	0.359	0.0196	NaN	MAPK3
Docosahexaenoic Acid (DHA) Signaling	0.482	0.354	0.0192	NaN	FGFR4
FcγRIIB Signaling in B Lymphocytes	0.475	0.35	0.0189	NaN	FGFR4
Semaphorin Signaling in Neurons	0.475	0.35	0.0189	NaN	MAPK3
Role of Cytokines in Mediating Communication between Immune Cells	0.468	0.346	0.0185	NaN	TNF
Gαq Signaling	0.46	0.339	0.0125	NaN	FGFR4,MAPK3
Protein Kinase A Signaling	0.456	0.337	0.0103	NaN	CDC25B,ADCY2,MAPK3,DUSP4
Regulation of Cellular Mechanics by Calpain Protease	0.45	0.334	0.0175	NaN	MAPK3
Wnt/Ca+ pathway	0.45	0.334	0.0175	NaN	FZD8
Chondroitin Sulfate Biosynthesis	0.444	0.329	0.0172	NaN	SULT1C4
Induction of Apoptosis by HIV1	0.432	0.323	0.0167	NaN	TNF
Ephrin A Signaling	0.432	0.323	0.0167	NaN	FGFR4
Dermatan Sulfate Biosynthesis	0.432	0.323	0.0167	NaN	SULT1C4
Tec Kinase Signaling	0.426	0.32	0.0118	NaN	FGFR4,TNF
Retinoic acid Mediated Apoptosis Signaling	0.426	0.32	0.0164	NaN	PARP8
Activation of IRF by Cytosolic Pattern Recognition Receptors	0.421	0.32	0.0161	NaN	TNF
Melatonin Degradation I	0.421	0.32	0.0161	NaN	SULT1C4
Phospholipases	0.421	0.32	0.0161	NaN	PLCH1
PCP pathway	0.415	0.316	0.0159	NaN	FZD8
Mitotic Roles of Polo-Like Kinase	0.4	0.302	0.0152	NaN	CDC25B
Heparan Sulfate Biosynthesis (Late Stages)	0.395	0.302	0.0149	NaN	SULT1C4
Superpathway of Melatonin Degradation	0.395	0.302	0.0149	NaN	SULT1C4
GABA Receptor Signaling	0.395	0.302	0.0149	NaN	ADCY2
Role of NFAT in Regulation of the Immune Response	0.387	0.297	0.0109	NaN	FGFR4,MAPK3
Agrin Interactions at Neuromuscular Junction	0.385	0.297	0.0145	NaN	MAPK3
3-phosphoinositide Biosynthesis	0.385	0.297	0.0109	NaN	CDC25B,FGFR4
B Cell Receptor Signaling	0.382	0.296	0.0108	NaN	FGFR4,MAPK3
Myc Mediated Apoptosis Signaling	0.38	0.296	0.0143	NaN	FGFR4
Caveolar-mediated Endocytosis Signaling	0.376	0.296	0.0141	NaN	ALB
Melatonin Signaling	0.376	0.296	0.0141	NaN	MAPK3
Chemokine Signaling	0.376	0.296	0.0141	NaN	MAPK3
Basal Cell Carcinoma Signaling	0.371	0.294	0.0139	NaN	FZD8
GPCR-Mediated Integration of Enteroendocrine Signaling Exemplified by an L Cell	0.371	0.294	0.0139	NaN	ADCY2
Ephrin B Signaling	0.367	0.291	0.0137	NaN	MAPK3
Serotonin Degradation	0.362	0.29	0.0135	NaN	SULT1C4
Toll-like Receptor Signaling	0.362	0.29	0.0135	NaN	TNF
Heparan Sulfate Biosynthesis	0.358	0.287	0.0133	NaN	SULT1C4
Role of Wnt/GSK-3β Signaling in the Pathogenesis of Influenza	0.354	0.284	0.0132	NaN	FZD8
Angiopoietin Signaling	0.349	0.283	0.013	NaN	FGFR4
Dopamine Receptor Signaling	0.349	0.283	0.013	NaN	ADCY2
VDR/RXR Activation	0.345	0.281	0.0128	NaN	HES1
Macropinocytosis Signaling	0.333	0.27	0.0123	NaN	FGFR4
Small Cell Lung Cancer Signaling	0.322	0.262	0.0119	NaN	FGFR4
Allograft Rejection Signaling	0.322	0.262	0.0119	NaN	TNF
GPCR-Mediated Nutrient Sensing in Enteroendocrine Cells	0.318	0.26	0.0118	NaN	ADCY2
HIPPO signaling	0.315	0.258	0.0116	NaN	TEAD4
Neuregulin Signaling	0.308	0.255	0.0114	NaN	MAPK3
HER-2 Signaling in Breast Cancer	0.308	0.255	0.0114	NaN	FGFR4
Altered T Cell and B Cell Signaling in Rheumatoid Arthritis	0.308	0.255	0.0114	NaN	TNF
Communication between Innate and Adaptive Immune Cells	0.304	0.255	0.0112	NaN	TNF
Crosstalk between Dendritic Cells and Natural Killer Cells	0.304	0.255	0.0112	NaN	TNF
Integrin Signaling	0.3	0.252	0.00913	NaN	FGFR4,MAPK3
IL-1 Signaling	0.298	0.251	0.011	NaN	ADCY2
Reelin Signaling in Neurons	0.294	0.249	0.0109	NaN	FGFR4
Fcγ Receptor-mediated Phagocytosis in Macrophages and Monocytes	0.291	0.247	0.0108	NaN	MAPK3
Actin Cytoskeleton Signaling	0.282	0.239	0.00877	NaN	FGFR4,MAPK3
CTLA4 Signaling in Cytotoxic T Lymphocytes	0.273	0.232	0.0101	NaN	FGFR4
Phospholipase C Signaling	0.265	0.226	0.00844	NaN	ADCY2,MAPK3
Virus Entry via Endocytic Pathways	0.264	0.226	0.0098	NaN	FGFR4
Signaling by Rho Family GTPases	0.247	0.21	0.0081	NaN	FGFR4,MAPK3
Type I Diabetes Mellitus Signaling	0.243	0.209	0.00909	NaN	TNF
Amyotrophic Lateral Sclerosis Signaling	0.24	0.209	0.00901	NaN	FGFR4
p53 Signaling	0.24	0.209	0.00901	NaN	FGFR4
Androgen Signaling	0.24	0.209	0.00901	NaN	MAPK3
Paxillin Signaling	0.235	0.206	0.00885	NaN	FGFR4
Synaptic Long Term Potentiation	0.219	0.192	0.00833	NaN	MAPK3
iCOS-iCOSL Signaling in T Helper Cells	0.219	0.192	0.00833	NaN	FGFR4
Gustation Pathway	0.215	0.191	0.0082	NaN	ADCY2
phagosome formation	0.215	0.191	0.0082	NaN	FGFR4
Estrogen Receptor Signaling	0.203	0.182	0.00781	NaN	MAPK3
CD28 Signaling in T Helper Cells	0.201	0.182	0.00775	NaN	FGFR4
D-myo-inositol (1,4,5,6)-Tetrakisphosphate Biosynthesis	0.201	0.182	0.00775	NaN	CDC25B
D-myo-inositol (3,4,5,6)-tetrakisphosphate Biosynthesis	0.201	0.182	0.00775	NaN	CDC25B
Cellular Effects of Sildenafil (Viagra)	0.199	0.181	0.00769	NaN	ADCY2

## Sheet: MM134&SUM44 co-downreg pathway
IPA pathway results: using the 256 downregulated genes in MM134 and SUM44 LTED cells
Ingenuity Canonical Pathways	-log(p-value)	-log(B-H p-value)	Ratio	z-score	Molecules
Inhibition of Matrix Metalloproteases	5.46	2.96	0.154	NaN	ADAM12,SDC2,TIMP1,MMP16,A2M,MMP24
Axonal Guidance Signaling	5.12	2.92	0.0379	NaN	EPHA7,FYN,WNT9A,PIK3C2G,BMP5,SEMA6C,EFNB2,MICAL1,SRGAP3,NTRK2,ADAM12,SDC2,IRS1,ABLIM3,PLCL1,WNT11,FZD7
Role of NANOG in Mammalian Embryonic Stem Cell Pluripotency	4.28	2.25	0.0656	NaN	LIFR,JAK1,IRS1,WNT9A,PIK3C2G,BMP5,WNT11,FZD7
Molecular Mechanisms of Cancer	3.66	1.76	0.0348	NaN	FOS,FYN,JAK1,IRS1,WNT9A,CDKN1A,RHOU,PIK3C2G,BMP5,CDKN2B,MAPK11,WNT11,FZD7
Glioblastoma Multiforme Signaling	3.48	1.73	0.0503	NaN	IRS1,WNT9A,CDKN1A,RHOU,PIK3C2G,PLCL1,WNT11,FZD7
Colorectal Cancer Metastasis Signaling	3.45	1.73	0.0405	NaN	FOS,JAK1,IRS1,MMP16,WNT9A,RHOU,PIK3C2G,MMP24,WNT11,FZD7
Aldosterone Signaling in Epithelial Cells	3.35	1.73	0.0482	NaN	SCNN1G,IRS1,DNAJC6,HSPB8,PIK3C2G,DNAJC15,PLCL1,HSPA12A
Inhibition of Angiogenesis by TSP1	3.33	1.73	0.118	NaN	FYN,SDC2,GUCY1A2,MAPK11
PCP pathway	3.24	1.69	0.0794	NaN	SDC2,WNT9A,SDC3,WNT11,FZD7
TR/RXR Activation	3.18	1.68	0.0612	NaN	KLF9,IRS1,DIO1,PIK3C2G,SLC16A2,THRSP
EGF Signaling	3.08	1.67	0.0735	NaN	FOS,JAK1,IRS1,PIK3C2G,MAPK11
Human Embryonic Stem Cell Pluripotency	3.04	1.67	0.049	NaN	NTRK2,IRS1,WNT9A,PIK3C2G,BMP5,WNT11,FZD7
Glioma Invasiveness Signaling	3.03	1.67	0.0714	NaN	TIMP1,IRS1,CD44,RHOU,PIK3C2G
Role of Osteoblasts, Osteoclasts and Chondrocytes in Rheumatoid Arthritis	3.02	1.67	0.0388	NaN	FOS,IRS1,WNT9A,PIK3C2G,IL1RAP,BMP5,ALPL,WNT11,FZD7
Mouse Embryonic Stem Cell Pluripotency	3	1.67	0.0566	NaN	LIFR,JAK1,IRS1,PIK3C2G,MAPK11,FZD7
p53 Signaling	2.89	1.6	0.0541	NaN	TP53INP1,TP63,GADD45A,IRS1,CDKN1A,PIK3C2G
JAK/Stat Signaling	2.69	1.45	0.0602	NaN	FOS,JAK1,IRS1,CDKN1A,PIK3C2G
Leukocyte Extravasation Signaling	2.69	1.45	0.0381	NaN	TIMP1,IRS1,MMP16,CD44,PIK3C2G,MAPK11,MMP24,MSN
IL-17 Signaling	2.65	1.43	0.0588	NaN	JAK1,TIMP1,IRS1,PIK3C2G,MAPK11
Acute Phase Response Signaling	2.62	1.42	0.0414	NaN	C1R,C4A/C4B,FOS,SERPINE1,A2M,MAPK11,IL1RAP
IL-6 Signaling	2.6	1.42	0.0472	NaN	FOS,IRS1,PIK3C2G,A2M,MAPK11,IL1RAP
HMGB1 Signaling	2.5	1.34	0.0451	NaN	FOS,IRS1,RHOU,PIK3C2G,SERPINE1,MAPK11
Ephrin A Signaling	2.4	1.29	0.0667	NaN	EPHA7,FYN,IRS1,PIK3C2G
ErbB Signaling	2.38	1.29	0.051	NaN	FOS,IRS1,PIK3C2G,MAPK11,AREG
Endothelin-1 Signaling	2.38	1.29	0.0374	NaN	FOS,IRS1,GUCY1A2,PIK3C2G,RARRES3,PLCL1,MAPK11
Insulin Receptor Signaling	2.37	1.29	0.0426	NaN	FYN,JAK1,SCNN1G,IRS1,PIK3C2G,GRB10
Regulation of the Epithelial-Mesenchymal Transition Pathway	2.35	1.29	0.037	NaN	JAK1,IRS1,WNT9A,FGF12,PIK3C2G,WNT11,FZD7
Ovarian Cancer Signaling	2.33	1.29	0.0417	NaN	IRS1,WNT9A,CD44,PIK3C2G,WNT11,FZD7
CNTF Signaling	2.33	1.29	0.0635	NaN	LIFR,JAK1,IRS1,PIK3C2G
UVA-Induced MAPK Signaling	2.31	1.29	0.049	NaN	FOS,IRS1,PIK3C2G,PLCL1,MAPK11
IL-2 Signaling	2.3	1.29	0.0625	NaN	FOS,JAK1,IRS1,PIK3C2G
UVB-Induced MAPK Signaling	2.25	1.26	0.0606	NaN	FOS,IRS1,PIK3C2G,MAPK11
IGF-1 Signaling	2.24	1.26	0.0472	NaN	FOS,JAK1,IRS1,PIK3C2G,GRB10
IL-10 Signaling	2.21	1.24	0.0588	NaN	FOS,JAK1,MAPK11,IL1RAP
Role of Macrophages, Fibroblasts and Endothelial Cells in Rheumatoid Arthritis	2.19	1.24	0.0291	NaN	IL16,FOS,IRS1,WNT9A,PIK3C2G,PLCL1,IL1RAP,WNT11,FZD7
Amyotrophic Lateral Sclerosis Signaling	2.15	1.21	0.045	NaN	PRPH,GRIK4,IRS1,PIK3C2G,CACNA1C
Nitric Oxide Signaling in the Cardiovascular System	2.12	1.2	0.0442	NaN	PRKG1,IRS1,GUCY1A2,PIK3C2G,CACNA1C
Basal Cell Carcinoma Signaling	2.12	1.2	0.0556	NaN	WNT9A,BMP5,WNT11,FZD7
Neuropathic Pain Signaling In Dorsal Horn Neurons	2.11	1.2	0.0439	NaN	FOS,NTRK2,IRS1,PIK3C2G,PLCL1
HIF1α Signaling	2.09	1.19	0.0435	NaN	IRS1,MMP16,PIK3C2G,MAPK11,MMP24
Antiproliferative Role of Somatostatin Receptor 2	2.06	1.19	0.0533	NaN	IRS1,CDKN1A,GUCY1A2,PIK3C2G
Pancreatic Adenocarcinoma Signaling	2.05	1.19	0.0424	NaN	JAK1,IRS1,CDKN1A,PIK3C2G,CDKN2B
IL-15 Signaling	2.04	1.19	0.0526	NaN	JAK1,IRS1,PIK3C2G,MAPK11
GDNF Family Ligand-Receptor Interactions	2.04	1.19	0.0526	NaN	FOS,IRS1,PIK3C2G,GFRA2
Neurotrophin/TRK Signaling	2.04	1.19	0.0526	NaN	FOS,NTRK2,IRS1,PIK3C2G
IL-17A Signaling in Airway Cells	2.02	1.18	0.0519	NaN	JAK1,IRS1,PIK3C2G,MAPK11
Gap Junction Signaling	2.01	1.18	0.0357	NaN	DBN1,PRKG1,IRS1,GUCY1A2,PIK3C2G,PLCL1
CD40 Signaling	2	1.18	0.0513	NaN	FOS,IRS1,PIK3C2G,MAPK11
Tec Kinase Signaling	1.99	1.18	0.0353	NaN	FYN,FOS,JAK1,IRS1,RHOU,PIK3C2G
Growth Hormone Signaling	1.95	1.16	0.0494	NaN	FOS,IRS1,PIK3C2G,A2M
Sperm Motility	1.94	1.16	0.04	NaN	PRKG1,GUCY1A2,RARRES3,PLCL1,PTK7
iNOS Signaling	1.93	1.16	0.0682	NaN	FOS,JAK1,MAPK11
IL-3 Signaling	1.91	1.16	0.0482	NaN	FOS,JAK1,IRS1,PIK3C2G
Prolactin Signaling	1.91	1.16	0.0482	NaN	FYN,FOS,IRS1,PIK3C2G
Granulocyte Adhesion and Diapedesis	1.91	1.16	0.0339	NaN	SDC2,MMP16,SDC3,IL1RAP,MMP24,MSN
IL-9 Signaling	1.9	1.16	0.0667	NaN	JAK1,IRS1,PIK3C2G
PI3K Signaling in B Lymphocytes	1.9	1.16	0.0391	NaN	FYN,FOS,IRS1,PLEKHA4,PLCL1
Glucocorticoid Receptor Signaling	1.9	1.16	0.0279	NaN	FOS,JAK1,IRS1,CDKN1A,PIK3C2G,SERPINE1,A2M,MAPK11
14-3-3-mediated Signaling	1.88	1.15	0.0385	NaN	FOS,IRS1,MAPT,PIK3C2G,PLCL1
p70S6K Signaling	1.86	1.14	0.0382	NaN	JAK1,IRS1,MAPT,PIK3C2G,PLCL1
LPS-stimulated MAPK Signaling	1.86	1.14	0.0465	NaN	FOS,IRS1,PIK3C2G,MAPK11
Hepatic Fibrosis / Hepatic Stellate Cell Activation	1.84	1.14	0.0328	NaN	COL16A1,COL4A5,TIMP1,SERPINE1,A2M,IL1RAP
Bladder Cancer Signaling	1.84	1.14	0.046	NaN	MMP16,FGF12,CDKN1A,MMP24
HER-2 Signaling in Breast Cancer	1.82	1.13	0.0455	NaN	IRS1,CDKN1A,PIK3C2G,AREG
FGF Signaling	1.79	1.11	0.0444	NaN	IRS1,FGF12,PIK3C2G,MAPK11
PDGF Signaling	1.79	1.11	0.0444	NaN	FOS,JAK1,IRS1,PIK3C2G
Reelin Signaling in Neurons	1.76	1.09	0.0435	NaN	FYN,IRS1,MAPT,PIK3C2G
GADD45 Signaling	1.76	1.09	0.105	NaN	GADD45A,CDKN1A
NRF2-mediated Oxidative Stress Response	1.74	1.08	0.0311	NaN	FOS,IRS1,DNAJC6,HSPB8,PIK3C2G,DNAJC15
Production of Nitric Oxide and Reactive Oxygen Species in Macrophages	1.74	1.08	0.0311	NaN	FOS,JAK1,IRS1,RHOU,PIK3C2G,MAPK11
Melanoma Signaling	1.67	1.02	0.0545	NaN	IRS1,CDKN1A,PIK3C2G
Relaxin Signaling	1.63	0.993	0.0333	NaN	FOS,PDE9A,IRS1,GUCY1A2,PIK3C2G
RANK Signaling in Osteoclasts	1.63	0.99	0.0396	NaN	FOS,IRS1,PIK3C2G,MAPK11
ATM Signaling	1.59	0.961	0.0508	NaN	GADD45A,CDKN1A,MAPK11
eNOS Signaling	1.58	0.957	0.0323	NaN	LPAR6,PRKG1,IRS1,GUCY1A2,PIK3C2G
IL-22 Signaling	1.57	0.947	0.0833	NaN	JAK1,MAPK11
IL-17A Signaling in Gastric Cells	1.53	0.925	0.08	NaN	FOS,MAPK11
Role of JAK family kinases in IL-6-type Cytokine Signaling	1.53	0.925	0.08	NaN	JAK1,MAPK11
T Cell Receptor Signaling	1.52	0.919	0.0367	NaN	FYN,FOS,IRS1,PIK3C2G
Glioma Signaling	1.51	0.912	0.0364	NaN	IRS1,CDKN1A,PIK3C2G,CDKN2B
Thyronamine and Iodothyronamine Metabolism	1.5	0.91	0.333	NaN	DIO1
Thyroid Hormone Metabolism I (via Deiodination)	1.5	0.91	0.333	NaN	DIO1
Thrombopoietin Signaling	1.48	0.902	0.0462	NaN	FOS,IRS1,PIK3C2G
IL-15 Production	1.47	0.895	0.0741	NaN	JAK1,PTK7
Role of IL-17A in Arthritis	1.45	0.882	0.0448	NaN	IRS1,PIK3C2G,MAPK11
HGF Signaling	1.45	0.882	0.0348	NaN	FOS,IRS1,CDKN1A,PIK3C2G
Fc Epsilon RI Signaling	1.4	0.855	0.0336	NaN	FYN,IRS1,PIK3C2G,MAPK11
Ephrin Receptor Signaling	1.4	0.855	0.0287	NaN	EPHA7,FYN,EFNB2,SDC2,PIK3C2G
Renin-Angiotensin Signaling	1.39	0.855	0.0333	NaN	FOS,IRS1,PIK3C2G,MAPK11
Role of JAK1 and JAK3 in γc Cytokine Signaling	1.39	0.855	0.0423	NaN	JAK1,IRS1,PIK3C2G
Chemokine Signaling	1.39	0.855	0.0423	NaN	FOS,PIK3C2G,MAPK11
Cardiac Hypertrophy Signaling	1.38	0.855	0.0255	NaN	IRS1,RHOU,PIK3C2G,CACNA1C,PLCL1,MAPK11
Catecholamine Biosynthesis	1.37	0.855	0.25	NaN	DDC
Acetate Conversion to Acetyl-CoA	1.37	0.855	0.25	NaN	ACSS3
Sphingosine-1-phosphate Signaling	1.37	0.855	0.0328	NaN	IRS1,RHOU,PIK3C2G,PLCL1
Role of Tissue Factor in Cancer	1.37	0.855	0.0328	NaN	FYN,IRS1,PIK3C2G,MAPK11
phagosome formation	1.37	0.855	0.0328	NaN	IRS1,RHOU,PIK3C2G,PLCL1
STAT3 Pathway	1.36	0.848	0.0411	NaN	NTRK2,CDKN1A,MAPK11
Role of Wnt/GSK-3β Signaling in the Pathogenesis of Influenza	1.31	0.811	0.0395	NaN	WNT9A,WNT11,FZD7
3-phosphoinositide Biosynthesis	1.31	0.811	0.0272	NaN	FYN,IRS1,PIK3C2G,ALPL,DUSP2
Estrogen-Dependent Breast Cancer Signaling	1.3	0.806	0.039	NaN	FOS,IRS1,PIK3C2G
CD28 Signaling in T Helper Cells	1.29	0.806	0.031	NaN	FYN,FOS,IRS1,PIK3C2G
Role of JAK2 in Hormone-like Cytokine Signaling	1.29	0.806	0.0588	NaN	JAK1,IRS1
Cellular Effects of Sildenafil (Viagra)	1.28	0.806	0.0308	NaN	PRKG1,GUCY1A2,CACNA1C,PLCL1
PKCθ Signaling in T Lymphocytes	1.28	0.806	0.0308	NaN	FYN,FOS,IRS1,PIK3C2G
Erythropoietin Signaling	1.27	0.804	0.038	NaN	FOS,IRS1,PIK3C2G
Coagulation System	1.27	0.804	0.0571	NaN	SERPINE1,A2M
IL-17A Signaling in Fibroblasts	1.27	0.804	0.0571	NaN	FOS,MAPK11
P2Y Purigenic Receptor Signaling Pathway	1.27	0.804	0.0303	NaN	FOS,IRS1,PIK3C2G,PLCL1
Dendritic Cell Maturation	1.26	0.804	0.0263	NaN	IRS1,FSCN1,PIK3C2G,PLCL1,MAPK11
Renal Cell Carcinoma Signaling	1.25	0.793	0.037	NaN	FOS,IRS1,PIK3C2G
Interferon Signaling	1.24	0.793	0.0556	NaN	IFITM3,JAK1
Complement System	1.22	0.776	0.0541	NaN	C1R,C4A/C4B
Small Cell Lung Cancer Signaling	1.21	0.772	0.0357	NaN	IRS1,PIK3C2G,CDKN2B
PEDF Signaling	1.21	0.772	0.0357	NaN	IRS1,PIK3C2G,MAPK11
Serotonin and Melatonin Biosynthesis	1.2	0.772	0.167	NaN	DDC
April Mediated Signaling	1.2	0.772	0.0526	NaN	FOS,MAPK11
FLT3 Signaling in Hematopoietic Progenitor Cells	1.2	0.772	0.0353	NaN	IRS1,PIK3C2G,MAPK11
Leptin Signaling in Obesity	1.2	0.772	0.0353	NaN	IRS1,PIK3C2G,PLCL1
ERK/MAPK Signaling	1.19	0.772	0.0251	NaN	FYN,FOS,IRS1,PIK3C2G,DUSP2
HIPPO signaling	1.18	0.769	0.0349	NaN	TEAD1,DLG2,CD44
Netrin Signaling	1.18	0.769	0.0513	NaN	PRKG1,ABLIM3
Hereditary Breast Cancer Signaling	1.17	0.769	0.0282	NaN	GADD45A,IRS1,CDKN1A,PIK3C2G
IL-4 Signaling	1.17	0.769	0.0345	NaN	JAK1,IRS1,PIK3C2G
TGF-β Signaling	1.17	0.769	0.0345	NaN	FOS,SERPINE1,MAPK11
Thrombin Signaling	1.16	0.767	0.0246	NaN	IRS1,RHOU,PIK3C2G,PLCL1,MAPK11
B Cell Activating Factor Signaling	1.16	0.767	0.05	NaN	FOS,MAPK11
VEGF Family Ligand-Receptor Interactions	1.16	0.767	0.0341	NaN	FOS,IRS1,PIK3C2G
Pregnenolone Biosynthesis	1.14	0.755	0.143	NaN	MICAL1
Synaptic Long Term Depression	1.14	0.755	0.0274	NaN	PRKG1,GUCY1A2,RARRES3,PLCL1
IL-12 Signaling and Production in Macrophages	1.14	0.755	0.0274	NaN	FOS,IRS1,PIK3C2G,MAPK11
UVC-Induced MAPK Signaling	1.13	0.75	0.0476	NaN	FOS,MAPK11
IL-1 Signaling	1.13	0.75	0.033	NaN	FOS,MAPK11,IL1RAP
Factors Promoting Cardiogenesis in Vertebrates	1.11	0.742	0.0326	NaN	BMP5,WNT11,FZD7
Role of p14/p19ARF in Tumor Suppression	1.11	0.739	0.0465	NaN	IRS1,PIK3C2G
Ceramide Signaling	1.1	0.737	0.0323	NaN	FOS,IRS1,PIK3C2G
Prostate Cancer Signaling	1.09	0.73	0.0319	NaN	IRS1,CDKN1A,PIK3C2G
Glycoaminoglycan-protein Linkage Region Biosynthesis	1.08	0.722	0.125	NaN	XYLT1
CTLA4 Signaling in Cytotoxic T Lymphocytes	1.04	0.69	0.0303	NaN	FYN,IRS1,PIK3C2G
CDK5 Signaling	1.04	0.69	0.0303	NaN	NTRK2,MAPT,MAPK11
FAK Signaling	1.04	0.69	0.0303	NaN	FYN,IRS1,PIK3C2G
Superpathway of Inositol Phosphate Compounds	1.02	0.676	0.0223	NaN	FYN,IRS1,PIK3C2G,ALPL,DUSP2
Virus Entry via Endocytic Pathways	1.01	0.672	0.0294	NaN	FYN,IRS1,PIK3C2G
Cell Cycle: G2/M DNA Damage Checkpoint Regulation	1.01	0.672	0.0408	NaN	GADD45A,CDKN1A
Dopamine-DARPP32 Feedback in cAMP Signaling	1.01	0.672	0.0247	NaN	PRKG1,GUCY1A2,CACNA1C,PLCL1
Antioxidant Action of Vitamin C	1	0.666	0.0291	NaN	RARRES3,PLCL1,MAPK11
Chronic Myeloid Leukemia Signaling	0.992	0.665	0.0288	NaN	IRS1,CDKN1A,PIK3C2G
SAPK/JNK Signaling	0.992	0.665	0.0288	NaN	GADD45A,IRS1,PIK3C2G
Histidine Degradation VI	0.989	0.665	0.1	NaN	MICAL1
CXCR4 Signaling	0.988	0.665	0.0242	NaN	FOS,IRS1,RHOU,PIK3C2G
Amyloid Processing	0.982	0.661	0.0392	NaN	MAPT,MAPK11
Docosahexaenoic Acid (DHA) Signaling	0.968	0.65	0.0385	NaN	IRS1,PIK3C2G
Wnt/β-catenin Signaling	0.96	0.645	0.0237	NaN	WNT9A,CD44,WNT11,FZD7
FcγRIIB Signaling in B Lymphocytes	0.954	0.645	0.0377	NaN	IRS1,PIK3C2G
Semaphorin Signaling in Neurons	0.954	0.645	0.0377	NaN	FYN,RHOU
Type I Diabetes Mellitus Signaling	0.938	0.632	0.0273	NaN	JAK1,MAPK11,IL1RAP
Germ Cell-Sertoli Cell Junction Signaling	0.933	0.631	0.0231	NaN	IRS1,RHOU,PIK3C2G,A2M
Corticotropin Releasing Hormone Signaling	0.93	0.631	0.027	NaN	FOS,GUCY1A2,MAPK11
Telomerase Signaling	0.93	0.631	0.027	NaN	IRS1,CDKN1A,PIK3C2G
Paxillin Signaling	0.913	0.617	0.0265	NaN	IRS1,PIK3C2G,MAPK11
Wnt/Ca+ pathway	0.902	0.61	0.0351	NaN	PLCL1,FZD7
Sertoli Cell-Sertoli Cell Junction Signaling	0.9	0.61	0.0225	NaN	PRKG1,GUCY1A2,A2M,MAPK11
Signaling by Rho Family GTPases	0.892	0.605	0.0202	NaN	FOS,IRS1,RHOU,PIK3C2G,MSN
Chondroitin Sulfate Biosynthesis	0.89	0.605	0.0345	NaN	XYLT1,HS6ST2
Fatty Acid Activation	0.882	0.604	0.0769	NaN	ACSL4
Rac Signaling	0.88	0.604	0.0256	NaN	IRS1,CD44,PIK3C2G
p38 MAPK Signaling	0.88	0.604	0.0256	NaN	MAPT,MAPK11,IL1RAP
MSP-RON Signaling Pathway	0.878	0.604	0.0339	NaN	IRS1,PIK3C2G
Role of NFAT in Regulation of the Immune Response	0.869	0.597	0.0219	NaN	FYN,FOS,IRS1,PIK3C2G
Dermatan Sulfate Biosynthesis	0.866	0.597	0.0333	NaN	XYLT1,HS6ST2
CREB Signaling in Neurons	0.863	0.596	0.0217	NaN	GRIK4,IRS1,PIK3C2G,PLCL1
iCOS-iCOSL Signaling in T Helper Cells	0.856	0.592	0.025	NaN	IRS1,PIK3C2G,PLEKHA4
Ubiquinol-10 Biosynthesis (Eukaryotic)	0.852	0.591	0.0714	NaN	MICAL1
Phospholipases	0.843	0.587	0.0323	NaN	RARRES3,PLCL1
Natural Killer Cell Signaling	0.841	0.587	0.0246	NaN	FYN,IRS1,PIK3C2G
Gustation Pathway	0.841	0.587	0.0246	NaN	LPAR6,SCNN1G,PDE9A
AMPK Signaling	0.833	0.581	0.0212	NaN	IRS1,CDKN1A,PIK3C2G,MAPK11
Endometrial Cancer Signaling	0.821	0.575	0.0312	NaN	IRS1,PIK3C2G
Cell Cycle: G1/S Checkpoint Regulation	0.821	0.575	0.0312	NaN	CDKN1A,CDKN2B
Role of NFAT in Cardiac Hypertrophy	0.816	0.571	0.0208	NaN	IRS1,PIK3C2G,PLCL1,MAPK11
Type II Diabetes Mellitus Signaling	0.805	0.563	0.0236	NaN	IRS1,PIK3C2G,ACSL4
Chondroitin Sulfate Degradation (Metazoa)	0.799	0.562	0.0625	NaN	CD44
Parkinson's Signaling	0.799	0.562	0.0625	NaN	MAPK11
ILK Signaling	0.793	0.559	0.0204	NaN	FOS,IRS1,RHOU,PIK3C2G
Lymphotoxin β Receptor Signaling	0.79	0.559	0.0299	NaN	IRS1,PIK3C2G
IL-8 Signaling	0.788	0.559	0.0203	NaN	FOS,IRS1,RHOU,PIK3C2G
CCR3 Signaling in Eosinophils	0.784	0.559	0.0231	NaN	IRS1,PIK3C2G,MAPK11
Gα12/13 Signaling	0.784	0.559	0.0231	NaN	LPAR6,IRS1,PIK3C2G
G-Protein Coupled Receptor Signaling	0.779	0.559	0.0185	NaN	FYN,NPR3,PDE9A,IRS1,PIK3C2G
γ-linolenate Biosynthesis II (Animals)	0.775	0.559	0.0588	NaN	ACSL4
Dermatan Sulfate Degradation (Metazoa)	0.775	0.559	0.0588	NaN	CD44
Mitochondrial L-carnitine Shuttle Pathway	0.775	0.559	0.0588	NaN	ACSL4
CCR5 Signaling in Macrophages	0.77	0.558	0.029	NaN	FOS,MAPK11
ErbB2-ErbB3 Signaling	0.77	0.558	0.029	NaN	IRS1,PIK3C2G
Myc Mediated Apoptosis Signaling	0.76	0.551	0.0286	NaN	IRS1,PIK3C2G
Role of MAPK Signaling in the Pathogenesis of Influenza	0.742	0.536	0.0278	NaN	RARRES3,MAPK11
ErbB4 Signaling	0.742	0.536	0.0278	NaN	IRS1,PIK3C2G
GM-CSF Signaling	0.732	0.529	0.0274	NaN	IRS1,PIK3C2G
Toll-like Receptor Signaling	0.723	0.523	0.027	NaN	FOS,MAPK11
Heparan Sulfate Biosynthesis	0.715	0.516	0.0267	NaN	XYLT1,HS6ST2
Cardiomyocyte Differentiation via BMP Receptors	0.711	0.515	0.05	NaN	BMP5
Role of PI3K/AKT Signaling in the Pathogenesis of Influenza	0.706	0.514	0.0263	NaN	IRS1,PIK3C2G
BMP signaling pathway	0.706	0.514	0.0263	NaN	MAPK11,BMP5
Angiopoietin Signaling	0.697	0.514	0.026	NaN	IRS1,PIK3C2G
Non-Small Cell Lung Cancer Signaling	0.697	0.514	0.026	NaN	IRS1,PIK3C2G
Maturity Onset Diabetes of Young (MODY) Signaling	0.692	0.514	0.0476	NaN	CACNA1C
Oxidative Ethanol Degradation III	0.692	0.514	0.0476	NaN	ACSS3
Inflammasome pathway	0.692	0.514	0.0476	NaN	NLRP1
VDR/RXR Activation	0.689	0.514	0.0256	NaN	GADD45A,CDKN1A
Role of BRCA1 in DNA Damage Response	0.689	0.514	0.0256	NaN	GADD45A,CDKN1A
Cyclins and Cell Cycle Regulation	0.689	0.514	0.0256	NaN	CDKN1A,CDKN2B
Regulation of IL-2 Expression in Activated and Anergic T Lymphocytes	0.681	0.507	0.0253	NaN	FYN,FOS
Integrin Signaling	0.677	0.506	0.0183	NaN	FYN,IRS1,RHOU,PIK3C2G
Macropinocytosis Signaling	0.665	0.495	0.0247	NaN	IRS1,PIK3C2G
Role of JAK1, JAK2 and TYK2 in Interferon Signaling	0.641	0.476	0.0417	NaN	JAK1
Estrogen-mediated S-phase Entry	0.641	0.476	0.0417	NaN	CDKN1A
Actin Cytoskeleton Signaling	0.637	0.474	0.0175	NaN	IRS1,FGF12,PIK3C2G,MSN
NF-κB Activation by Viruses	0.627	0.472	0.0233	NaN	IRS1,PIK3C2G
Bupropion Degradation	0.625	0.472	0.04	NaN	CYP4F8
Tryptophan Degradation X (Mammalian, via Tryptamine)	0.625	0.472	0.04	NaN	DDC
Gluconeogenesis I	0.625	0.472	0.04	NaN	ME3
Ethanol Degradation IV	0.625	0.472	0.04	NaN	ACSS3
Regulation of eIF4 and p70S6K Signaling	0.622	0.471	0.0191	NaN	IRS1,PIK3C2G,MAPK11
Gαq Signaling	0.607	0.457	0.0188	NaN	IRS1,RHOU,PIK3C2G
Acetone Degradation I (to Methylglyoxal)	0.597	0.449	0.037	NaN	CYP4F8
Acute Myeloid Leukemia Signaling	0.592	0.446	0.022	NaN	IRS1,PIK3C2G
Fcγ Receptor-mediated Phagocytosis in Macrophages and Monocytes	0.578	0.436	0.0215	NaN	FYN,PIK3C2G
PPAR Signaling	0.578	0.436	0.0215	NaN	FOS,IL1RAP
Tight Junction Signaling	0.573	0.433	0.018	NaN	MPDZ,FOS,SNAP25
TNFR2 Signaling	0.57	0.432	0.0345	NaN	FOS
Melanocyte Development and Pigmentation Signaling	0.565	0.429	0.0211	NaN	IRS1,PIK3C2G
Sonic Hedgehog Signaling	0.557	0.423	0.0333	NaN	DYRK1B
4-1BB Signaling in T Lymphocytes	0.545	0.415	0.0323	NaN	MAPK11
RhoGDI Signaling	0.545	0.415	0.0173	NaN	CD44,RHOU,MSN
Fatty Acid β-oxidation I	0.534	0.406	0.0312	NaN	ACSL4
Protein Ubiquitination Pathway	0.531	0.406	0.0157	NaN	DNAJC6,HSPB8,DNAJC15,HSPA12A
Cholecystokinin/Gastrin-mediated Signaling	0.529	0.406	0.0198	NaN	FOS,RHOU
PAK Signaling	0.529	0.406	0.0198	NaN	IRS1,PIK3C2G
PPARα/RXRα Activation	0.523	0.402	0.0169	NaN	IRS1,PLCL1,IL1RAP
VEGF Signaling	0.517	0.398	0.0194	NaN	IRS1,PIK3C2G
NF-κB Signaling	0.515	0.397	0.0167	NaN	NTRK2,IRS1,PIK3C2G
Oncostatin M Signaling	0.512	0.396	0.0294	NaN	JAK1
B Cell Receptor Signaling	0.495	0.381	0.0162	NaN	IRS1,PIK3C2G,MAPK11
Stearate Biosynthesis I (Animals)	0.491	0.381	0.0278	NaN	ACSL4
autophagy	0.491	0.381	0.0278	NaN	ATG9B
tRNA Splicing	0.482	0.375	0.027	NaN	PDE9A
Ethanol Degradation II	0.482	0.375	0.027	NaN	ACSS3
Agranulocyte Adhesion and Diapedesis	0.479	0.374	0.0159	NaN	MMP16,MMP24,MSN
RAR Activation	0.475	0.372	0.0158	NaN	FOS,PNRC1,MAPK11
Estrogen Biosynthesis	0.463	0.361	0.0256	NaN	CYP4F8
EIF2 Signaling	0.46	0.36	0.0155	NaN	IRS1,PPP1R15A,PIK3C2G
Thyroid Cancer Signaling	0.454	0.36	0.025	NaN	NTRK2
Neuroprotective Role of THOP1 in Alzheimer's Disease	0.454	0.36	0.025	NaN	MAPT
Thyroid Hormone Metabolism II (via Conjugation and/or Degradation)	0.454	0.36	0.025	NaN	DIO1
Clathrin-mediated Endocytosis Signaling	0.449	0.356	0.0152	NaN	IRS1,FGF12,PIK3C2G
MIF Regulation of Innate Immunity	0.446	0.355	0.0244	NaN	FOS
NGF Signaling	0.445	0.355	0.0171	NaN	IRS1,PIK3C2G
mTOR Signaling	0.442	0.354	0.0151	NaN	IRS1,RHOU,PIK3C2G
PTEN Signaling	0.436	0.35	0.0168	NaN	NTRK2,CDKN1A
Xenobiotic Metabolism Signaling	0.432	0.35	0.014	NaN	IRS1,PIK3C2G,HS6ST2,MAPK11
Synaptic Long Term Potentiation	0.431	0.35	0.0167	NaN	CACNA1C,PLCL1
Serotonin Receptor Signaling	0.429	0.35	0.0233	NaN	DDC
Breast Cancer Regulation by Stathmin1	0.428	0.35	0.0148	NaN	IRS1,CDKN1A,PIK3C2G
LXR/RXR Activation	0.427	0.35	0.0165	NaN	C4A/C4B,IL1RAP
fMLP Signaling in Neutrophils	0.427	0.35	0.0165	NaN	IRS1,PIK3C2G
RhoA Signaling	0.422	0.348	0.0164	NaN	LPAR6,MSN
PI3K/AKT Signaling	0.414	0.341	0.0161	NaN	JAK1,CDKN1A
Dermatan Sulfate Biosynthesis (Late Stages)	0.407	0.335	0.0217	NaN	HS6ST2
nNOS Signaling in Neurons	0.399	0.33	0.0213	NaN	DLG2
GNRH Signaling	0.393	0.328	0.0155	NaN	FOS,MAPK11
D-myo-inositol (1,4,5,6)-Tetrakisphosphate Biosynthesis	0.393	0.328	0.0155	NaN	ALPL,DUSP2
D-myo-inositol (3,4,5,6)-tetrakisphosphate Biosynthesis	0.393	0.328	0.0155	NaN	ALPL,DUSP2
TNFR1 Signaling	0.386	0.324	0.0204	NaN	FOS
Chondroitin Sulfate Biosynthesis (Late Stages)	0.386	0.324	0.0204	NaN	HS6ST2
LPS/IL-1 Mediated Inhibition of RXR Function	0.372	0.311	0.0136	NaN	ACSL4,HS6ST2,IL1RAP
Cardiac β-adrenergic Signaling	0.37	0.311	0.0148	NaN	PDE9A,CACNA1C
CD27 Signaling in Lymphocytes	0.366	0.309	0.0192	NaN	FOS
Role of Pattern Recognition Receptors in Recognition of Bacteria and Viruses	0.362	0.308	0.0146	NaN	IRS1,PIK3C2G
Systemic Lupus Erythematosus Signaling	0.36	0.308	0.0133	NaN	FOS,IRS1,PIK3C2G
Phototransduction Pathway	0.36	0.308	0.0189	NaN	GUCY1A2
Nicotine Degradation III	0.354	0.305	0.0185	NaN	CYP4F8
Unfolded protein response	0.354	0.305	0.0185	NaN	PPP1R15A
Aryl Hydrocarbon Receptor Signaling	0.351	0.303	0.0143	NaN	FOS,CDKN1A
Role of CHK Proteins in Cell Cycle Checkpoint Control	0.348	0.302	0.0182	NaN	CDKN1A
Actin Nucleation by ARP-WASP Complex	0.342	0.298	0.0179	NaN	RHOU
Glutamate Receptor Signaling	0.337	0.294	0.0175	NaN	GRIK4
3-phosphoinositide Degradation	0.331	0.289	0.0137	NaN	ALPL,DUSP2
D-myo-inositol-5-phosphate Metabolism	0.328	0.287	0.0136	NaN	ALPL,DUSP2
Huntington's Disease Signaling	0.318	0.279	0.0124	NaN	IRS1,PIK3C2G,SNAP25
Melatonin Degradation I	0.311	0.274	0.0161	NaN	CYP4F8
ERK5 Signaling	0.306	0.272	0.0159	NaN	FOS
Nicotine Degradation II	0.306	0.272	0.0159	NaN	CYP4F8
Heparan Sulfate Biosynthesis (Late Stages)	0.288	0.258	0.0149	NaN	HS6ST2
Superpathway of Melatonin Degradation	0.288	0.258	0.0149	NaN	CYP4F8
Eicosanoid Signaling	0.288	0.258	0.0149	NaN	RARRES3
Caveolar-mediated Endocytosis Signaling	0.271	0.244	0.0141	NaN	FYN
Melatonin Signaling	0.271	0.244	0.0141	NaN	PLCL1
Cdc42 Signaling	0.269	0.244	0.012	NaN	FOS,MAPK11
GPCR-Mediated Integration of Enteroendocrine Signaling Exemplified by an L Cell	0.267	0.243	0.0139	NaN	PLCL1
Ephrin B Signaling	0.263	0.24	0.0137	NaN	EFNB2
Dopamine Receptor Signaling	0.248	0.226	0.013	NaN	DDC
GPCR-Mediated Nutrient Sensing in Enteroendocrine Cells	0.221	0.201	0.0118	NaN	PLCL1
Neuregulin Signaling	0.212	0.193	0.0114	NaN	AREG
Crosstalk between Dendritic Cells and Natural Killer Cells	0.209	0.192	0.0112	NaN	FSCN1
Regulation of Actin-based Motility by Rho	0.203	0.187	0.011	NaN	RHOU
Death Receptor Signaling	0.2	0.186	0.0109	NaN	TNFSF15
